# Supplementary material for: Facile, catalyst-free cascade synthesis of sulfonyl guanidinesviacarbodiimide coupling with amines
Source: Royal Society of Chemistry journal article supplement (doi:10.1039/c8cc08564a), 2019-01-01

# Facile, Catalyst free Cascade Synthesis of Sulfonyl Guanidines via Carbodiimide Coupling with amines

Debojit Hazarika, Arun Jyoti Borah and Prodeep Phukan

Department of Chemistry, Gauhati University,  
Gopinath Bordoloi Nagar, Guwahati-781014, Assam, India

## Table of contents:

|                                                                                                                                                                                     |          |
|-------------------------------------------------------------------------------------------------------------------------------------------------------------------------------------|----------|
| 1. General information.....                                                                                                                                                         | S2       |
| 2. General procedure for synthesis of <i>N</i> -propargyl amines.....                                                                                                               | S2-S3    |
| 3. General procedure for synthesis of <i>N</i> -allyl benzylamine.....                                                                                                              | S3       |
| 4. General procedure for synthesis of 2-ethyl-6-methyl isocyanobenzene.....                                                                                                         | S4       |
| 5. General procedure for synthesis of sulfonyl guanidines and characterization.....                                                                                                 | S4-S23   |
| 6. Procedure for gram scale synthesis.....                                                                                                                                          | S23      |
| 7. General procedure for synthesis of sulfonyl carbodiimides and characterization.....                                                                                              | S23-S25  |
| 8. Synthesis of sulfonyl guanidine (4a) from carbodiimide (7a).....                                                                                                                 | S25-S26  |
| 9. Procedure for synthesis of<br>1-benzyl-4-methylidene-3-[(4-methylphenyl)sulfonyl]imidazolidin-2-one.....                                                                         | S26      |
| 10. Procedure for synthesis of<br><i>N</i> -Allyl- <i>N</i> -( <i>N</i> -allyl- <i>N</i> -benzyl- <i>N'</i> - <i>tert</i> -butylcarbamiidoyl)-4-methylbenzenesulfonamide..<br>..... | S26-S27  |
| 11. Procedure for synthesis of<br><i>N</i> -(1-benzyl-3-tosyl-3,4-dihydro-1 <i>H</i> -1,3-diazepin-2(7 <i>H</i> )-ylidene)-2-methylpropan-2-amine..<br>.....                        | S27-S28  |
| 12. Procedure for synthesis of<br>1-Benzyl-3-tosyl-1,3,4,7-tetrahydro-[1,3]diazepin-2-one.....                                                                                      | S28      |
| 13. References.....                                                                                                                                                                 | S29      |
| 14. Crystal structure data of<br><i>N</i> -( <i>tert</i> -Butylamino-dimethylamino-methylene)-4-nitrobenzenesulfonamide.....                                                        | S30      |
| 15. Copies of <sup>1</sup> H and <sup>13</sup> C NMR spectra.....                                                                                                                   | S32-S149 |

## 1. General Information:

All the reactions were carried out in open atmosphere using flame-dried glassware. Distilled analytical grade solvents were used. The starting materials *N,N*-dibromoarylsulfonamides were synthesized according to the literature procedures.<sup>1</sup> <sup>1</sup>H and <sup>13</sup>C spectra were recorded on a Bruker Ultrashield 300 MHz spectrometer. Chemical shifts are given in  $\delta$  units relative to the tetramethylsilane (TMS) signal as an internal reference in CDCl<sub>3</sub>. <sup>1</sup>H NMR coupling constants were reported in Hz, and multiplicity was indicated as follows: s (singlet); d (doublet); t (triplet); q (quartet); m (multiplet); br (broad). IR spectra were recorded in IR Affinity-1 (SHIMADZU) spectrometer. Mass spectra were recorded on Q-TOF ESI-MS instrument (model HAB 273) and Bruker MaXis 10138 Q-TOF ESI instrument. Chromatographic purification was performed using flash column chromatography over a manually packed column containing silica gel (230-400 mesh). Melting points were measured in Relitech melting point apparatus. Single crystal X-ray diffraction data was collected on a Bruker SMART APEX II CCD diffractometer equipped with a graphite monochromator and a Mo K $\alpha$  fine-focus sealed tube ( $\lambda = 0.71073 \text{ \AA}$ ). Data integration was done using SAINT. Intensities for absorption were corrected using SADABS. Structure solution and refinement were carried out using Bruker SHELXTL. The hydrogen atoms were refined isotropically, and all the other atoms were refined anisotropically. N-H hydrogen was located from difference electron density maps, and C-H hydrogens were fixed using the HFIX command in SHELXTL. Molecular graphics were prepared using Mercury version 1.4.1 (free version).

## 2. General procedure for synthesis of *N*-propargyl amines:<sup>2</sup>

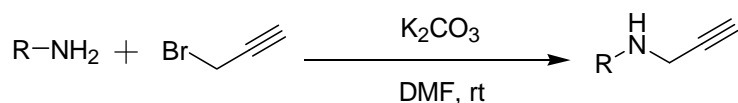

To a solution of amine (10 mmol, 1.0 equiv) in DMF (15 mL), K<sub>2</sub>CO<sub>3</sub> (5 mmol, 0.5 equiv) was added and stirred for 5 min at room temperature. Then a solution of propargyl bromide (2.5 mmol, 0.25 equiv) in DMF (5 mL) was added dropwise to the reaction mixture. The resulting mixture was stirred overnight at room temperature. After completion of the reaction, the mixture was diluted with ethyl acetate (20 mL) and washed with brine. The aqueous layer was extracted using ethyl acetate, dried over anhydrous Na<sub>2</sub>SO<sub>4</sub> and concentrated under reduced pressure. The

residue was purified by flash column chromatography on silica gel using petroleum ether-ethyl acetate (8:2) as eluent to afford *N*-propargyl amine.

**Benzyl-prop-2-ynyl-amine (A):**

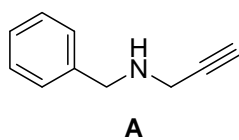

$^1\text{H NMR}$  ( $\text{CDCl}_3$ , 300 MHz):  $\delta$  7.35-7.29 (m, 5H), 3.89 (s, 2H), 3.43 (d,  $J$  = 2.4 Hz, 1H), 2.28 (t,  $J$  = 2. Hz, 1H);  $^{13}\text{C NMR}$  ( $\text{CDCl}_3$ , 75 MHz):  $\delta$  139.1, 128.34, 128.33, 127.0, 81.9, 71.5, 52.1, 37.1.

**Prop-2-ynyl-*p*-tolylamine (B):**

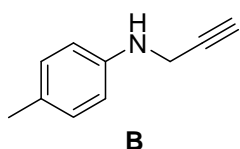

$^1\text{H NMR}$  ( $\text{CDCl}_3$ , 300 MHz):  $\delta$  7.06 (d,  $J$  = 7.8 Hz, 2H), 6.64 (d,  $J$  = 8.1 Hz, 2H), 3.93 (s, 2H), 3.77 (s, 1H), 2.28 (s, 3H), 2.22 (s, 1H);  $^{13}\text{C NMR}$  ( $\text{CDCl}_3$ , 75 MHz):  $\delta$  144.4, 129.6, 127.8, 113.6, 81.6, 71.1, 33.8, 20.3.

**3. General procedure for synthesis of *N*-allyl benzylamine (C):<sup>3</sup>**

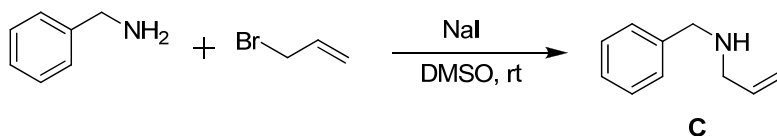

To a stirred solution of benzylamine (26.1 mmol, 2.05 equiv) and NaI (0.125 mmol, 0.01 equiv) in DMSO (20 mL), allyl bromide (12.7 mmol, 1.0 equiv) was added dropwise at 0 °C. The reaction was stirred for 18 h at room temperature. 1M aqueous  $\text{NaHCO}_3$  (30 mL) was added to the reaction mixture and the aqueous layer was extracted using diethyl ether. The combined organic layer was washed with saturated brine solution, dried over anhydrous  $\text{Na}_2\text{SO}_4$  and concentrated under reduced pressure. The crude product was purified by flash column chromatography using petroleum ether-ethyl acetate (7:3) as eluent to afford *N*-allyl benzylamine (C) as yellow oil.  $^1\text{H NMR}$  ( $\text{CDCl}_3$ , 300 MHz):  $\delta$  7.34-7.27 (m, 5H), 6.01-5.87 (m, 1H), 5.23-5.11 (m, 2H), 3.80 (s, 2H), 3.28 (d,  $J$  = 5.7 Hz, 2H);  $^{13}\text{C NMR}$  ( $\text{CDCl}_3$ , 75 MHz):  $\delta$  140.0, 136.5, 128.2, 128.0, 126.8, 115.9, 53.1, 51.6.

#### 4. General procedure for synthesis of 2-ethyl-6-methyl isocyanobenzene (**D**):<sup>4</sup>

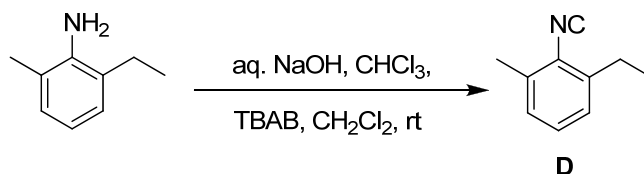

To a solution of 2-ethyl-6-methyl aniline (22 mmol, 1 equiv) in CH<sub>2</sub>Cl<sub>2</sub> (100 mL), 50 wt% of aqueous NaOH (50 mL), TBAB (1 mol%) and CHCl<sub>3</sub> (33 mmol, 1.5 equiv) was added and stirred at room temperature for 6 h. After completion of the reaction, the mixture was diluted with 200 mL of water and the organic layer was separated. The organic layer was further washed twice with 100 mL of water and once with 100 mL saturated NaCl solution. The organic layer was separated, dried over anhydrous Na<sub>2</sub>SO<sub>4</sub> and concentrated under reduced pressure. The crude mixture was purified by flash column chromatography using petroleum ether-dichloromethane (4:1) as eluent to afford 2-ethyl-6-methyl isocyanobenzene (**D**) as pale yellow liquid. <sup>1</sup>H NMR (CDCl<sub>3</sub>, 300 MHz): δ 7.25-7.20 (m, 1H), 7.10 (d, *J* = 7.5 Hz, 2H), 2.78 (q, *J* = 7.5 Hz, 2H), 2.43 (s, 3H), 1.27 (t, *J* = 7.5 Hz, 3H); <sup>13</sup>C NMR (CDCl<sub>3</sub>, 75 MHz): δ 167.5, 140.4, 134.9, 128.7, 127.6, 126.0, 25.6, 18.8, 13.7.

#### 5. General procedure for synthesis of sulfonyl guanidines and characterization:

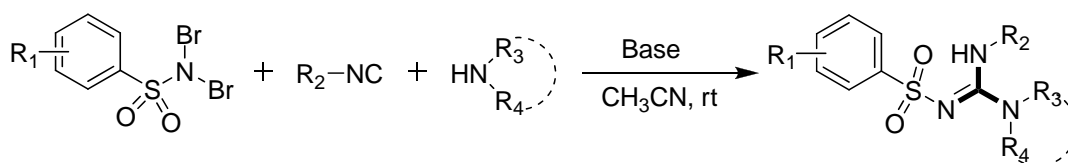

To a solution of isocyanide (0.5 mmol, 1.0 equiv) and amine (0.5 mmol, 1.0 equiv) in CH<sub>3</sub>CN (4 mL), *N,N*-dibromoarylsulfonamide (0.5 mmol, 1.0 equiv) and base (2-3 equiv) was added and stirred at room temperature. After completion of the reaction as monitored by TLC, the reaction mixture was pass through a short pad of celite and the washed with ethyl acetate. The solvent was concentrated under reduced pressure and further purified by flash column chromatography using petroleum ether-ethyl acetate as eluent to afford the desired product.

***N*-(*tert*-Butylamino-diethylamino-methylene)-4-methylbenzenesulfonamide (4a):**

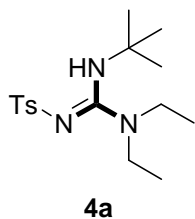

Following the general procedure, compound **4a** was prepared from *tert*-butyl isocyanide (57  $\mu$ L), *N,N*-dibromo-*p*-toluenesulfonamide (165 mg) and diethylamine (52  $\mu$ L) in presence of  $K_2CO_3$  (2 equiv., 138 mg). Purified by column chromatography on silica gel (Petroleum ether: EtOAc = 7:3). White solid (84%, 136.5 mg); mp 110-112  $^{\circ}C$ ;  $^1H$  NMR ( $CDCl_3$ , 300 MHz):  $\delta$  7.78 (d,  $J$  = 7.2 Hz, 2H), 7.21 (d,  $J$  = 7.8 Hz, 2H), 5.25 (s, 1H), 3.46 (q,  $J$  = 7.2 Hz, 4H), 2.37 (s, 3H), 1.18- 1.14 (m, 15H);  $^{13}C$  NMR ( $CDCl_3$ , 75 MHz):  $\delta$  157.5, 141.9, 141.1, 128.8, 125.8, 54.0, 44.0, 29.8, 21.3, 12.8; IR (KBr,  $cm^{-1}$ ):  $\nu$  3307, 2972, 2362, 1566, 1508, 1454, 1253, 1138, 1068, 862, 754, 711; HRMS  $m/z$  (ESI) calculated for  $C_{16}H_{28}N_3O_2S$  (M+H) $^{+}$  326.1896 found 326.1896.

***N*-(*tert*-Butylamino-dimethylamino-methylene)-4-methylbenzenesulfonamide (4b):**

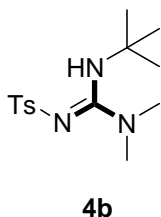

Following the general procedure, compound **4b** was prepared from *tert*-butyl isocyanide (57  $\mu$ L), *N,N*-dibromo-*p*-toluenesulfonamide (165 mg) and dimethylamine (34  $\mu$ L) in presence of  $K_2CO_3$  (2 equiv., 138 mg). Purified by column chromatography on silica gel (Petroleum ether: EtOAc = 7:3). White solid (82%, 121.7 mg); mp 152-154  $^{\circ}C$ ;  $^1H$  NMR ( $CDCl_3$ , 300 MHz):  $\delta$  7.79 (d,  $J$  = 8.1 Hz, 2H), 7.22 (d,  $J$  = 8.4 Hz, 2H), 4.92 (s, 1H), 3.06 (s, 6H), 2.38 (s, 3H), 1.15 (s, 9H);  $^{13}C$  NMR ( $CDCl_3$ , 75 MHz):  $\delta$  157.3, 142.1, 141.1, 128.8, 125.8, 53.6, 40.4, 29.6, 21.3; IR (KBr,  $cm^{-1}$ ):  $\nu$  3311, 2959, 2354, 1560, 1510, 1457, 1242, 1119, 1075, 860, 733; HRMS  $m/z$  (ESI) calculated for  $C_{14}H_{24}N_3O_2S$  (M+H) $^{+}$  298.1583 found 298.1580.

***N*-(*tert*-Butylamino-dipropylamino-methylene)-4-methylbenzenesulfonamide (4c):**

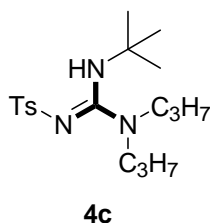

Following the general procedure, compound **4c** was prepared from *tert*-butyl isocyanide (57  $\mu$ L), *N,N*-dibromo-*p*-toluenesulfonamide (165 mg) and di-*n*-propylamine (68  $\mu$ L) in presence of  $K_2CO_3$  (2 equiv., 138 mg). Purified by column chromatography on silica gel (Petroleum ether: EtOAc = 4:1). White solid (84%, 148.2 mg); mp 138-140  $^{\circ}C$ ;  $^1H$  NMR ( $CDCl_3$ , 300 MHz):  $\delta$  7.77 (d,  $J$  = 8.1 Hz, 2H), 7.20 (d,  $J$  = 8.4 Hz, 2H), 5.26 (s, 1H), 3.34 (t,  $J$  = 7.5 Hz, 4H), 2.36 (s, 3H), 1.62-1.52 (m, 4H), 1.19 (s, 9H), 0.87 (t,  $J$  = 7.2 Hz, 6H);  $^{13}C$  NMR ( $CDCl_3$ , 75 MHz):  $\delta$  158.0, 141.9, 141.1, 128.8, 125.8, 54.1, 51.7, 29.8, 21.3, 20.9, 11.2; IR (KBr,  $cm^{-1}$ ):  $\nu$  3302, 2951,

2364, 1565, 1506, 1455, 1250, 1102, 1071, 857, 728; **HRMS m/z (ESI)** calculated for  $C_{18}H_{32}N_3O_2S$  (M+H)<sup>+</sup> 354.2209 found 354.2225.

***N*-(*tert*-Butylamino-dibutylamino-methylene)-4-methylbenzenesulfonamide (4d):**

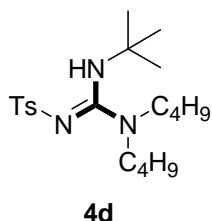

Following the general procedure, compound **4d** was prepared from *tert*-butyl isocyanide (57  $\mu$ L), *N,N*-dibromo-*p*-toluenesulfonamide (165 mg) and di-*n*-butylamine (84  $\mu$ L) in presence of  $K_2CO_3$  (2 equiv., 138 mg). Purified by column chromatography on silica gel (Petroleum ether: EtOAc = 4:1). White solid (87%, 165.7 mg); mp 110-112  $^{\circ}C$ ;  **$^1H$  NMR (CDCl<sub>3</sub>, 300 MHz):**  $\delta$  7.78 (d,  $J$  = 8.1 Hz, 2H), 7.21 (d,  $J$  = 8.1 Hz, 2H), 5.36 (s, 1H), 3.37 (t,  $J$  = 7.2 Hz, 4H), 2.37 (s, 3H), 1.55-1.48 (m, 4H), 1.32-1.21 (m, 13H), 0.89 (t,  $J$  = 7.2 Hz, 6H);  **$^{13}C$  NMR (CDCl<sub>3</sub>, 75 MHz):**  $\delta$  158.2, 141.9, 141.2, 128.8, 125.9, 54.4, 49.7, 30.0, 29.7, 21.3, 20.0, 13.7; **IR (KBr, cm<sup>-1</sup>):**  $\nu$  3332, 2964, 2362, 1566, 1508, 1458, 1255, 1136, 1074, 883, 719; **HRMS m/z (ESI)** calculated for  $C_{20}H_{36}N_3O_2S$  (M+H)<sup>+</sup> 382.2522 found 382.2528.

***N*-(*tert*-Butylamino-dioctylamino-methylene)-4-methylbenzenesulfonamide (4e):**

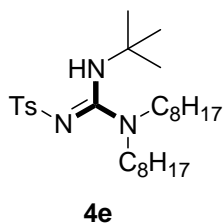

Following the general procedure, compound **4e** was prepared from *tert*-butyl isocyanide (57  $\mu$ L), *N,N*-dibromo-*p*-toluenesulfonamide (165 mg) and di-*n*-octylamine (151  $\mu$ L) in presence of  $K_2CO_3$  (2 equiv., 138 mg). Purified by column chromatography on silica gel (Petroleum ether: EtOAc = 9:1). Colorless oil (83%, 204.5 mg);  **$^1H$  NMR (CDCl<sub>3</sub>, 300 MHz):**  $\delta$  7.74 (d,  $J$  = 8.1 Hz, 2H), 7.17 (d,  $J$  = 8.1 Hz, 2H), 5.36 (s, 1H), 3.32 (t,  $J$  = 6.9 Hz, 4H), 2.33 (s, 3H), 1.47 (s, br, 4H), 1.33-1.17 (m, 29H), 0.84 (t,  $J$  = 6 Hz, 6H);  **$^{13}C$  NMR (CDCl<sub>3</sub>, 75 MHz):**  $\delta$  158.0, 141.9, 141.0, 128.7, 125.8, 54.2, 49.9, 31.6, 29.8, 29.1, 29.0, 27.5, 26.6, 22.4, 21.2, 13.9; **IR (KBr, cm<sup>-1</sup>):**  $\nu$  3320, 2948, 2367, 1558, 1514, 1447, 1236, 1108, 1069, 880, 751; **HRMS m/z (ESI)** calculated for  $C_{28}H_{52}N_3O_2S$  (M+H)<sup>+</sup> 494.3774 found 494.3774.

***N*-(*tert*-Butylamino-pyrrolidin-1-yl-methylene)-4-methylbenzenesulfonamide (4f):**

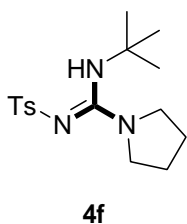

Following the general procedure, compound **4f** was prepared from *tert*-butyl isocyanide (57  $\mu$ L), *N,N*-dibromo-*p*-toluenesulfonamide (165 mg) and pyrrolidine (41  $\mu$ L) in presence of  $K_2CO_3$  (2 equiv., 138 mg). Purified by column chromatography on silica gel (Petroleum ether: EtOAc = 7:3). White solid (76%, 122.7 mg); mp 141-143  $^{\circ}C$ ;  $^1H$  NMR ( $CDCl_3$ , 300 MHz):  $\delta$  7.76 (d,  $J = 7.5$  Hz, 2H), 7.18 (d,  $J = 7.5$  Hz, 2H), 4.53 (s, 1H), 3.59 (s, br, 4H), 2.34 (s, 3H), 1.90 (s, br, 4H), 1.10 (s, 9H);  $^{13}C$  NMR ( $CDCl_3$ , 75 MHz):  $\delta$  152.5, 142.8, 140.5, 128.6, 125.5, 52.6, 49.6, 29.3, 25.3, 21.2; IR (KBr,  $cm^{-1}$ ):  $\nu$  3341, 2965, 2362, 1577, 1515, 1433, 1271, 1129, 1071, 866, 707; HRMS  $m/z$  (ESI) calculated for  $C_{16}H_{26}N_3O_2S$  (M+H) $^+$  324.1740 found 324.1744.

***N*-(*tert*-Butylamino-piperidin-1-yl-methylene)-4-methylbenzenesulfonamide (4g):**

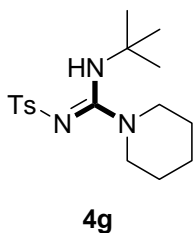

Following the general procedure, compound **4g** was prepared from *tert*-butyl isocyanide (57  $\mu$ L), *N,N*-dibromo-*p*-toluenesulfonamide (165 mg) and piperidine (49  $\mu$ L) in presence of  $K_2CO_3$  (2 equiv., 138 mg). Purified by column chromatography on silica gel (Petroleum ether: EtOAc = 7:3). White solid (83%, 139.8 mg); mp 115-117  $^{\circ}C$ ;  $^1H$  NMR ( $CDCl_3$ , 300 MHz):  $\delta$  7.78 (d,  $J = 8.4$  Hz, 2H), 7.21 (d,  $J = 8.1$  Hz, 2H), 5.17 (s, 1H), 3.44 (s, br, 4H), 2.37 (s, 3H), 1.63 (s, br, 6H), 1.16 (s, 9H);  $^{13}C$  NMR ( $CDCl_3$ , 75 MHz):  $\delta$  157.9, 141.8, 141.2, 128.8, 125.9, 54.0, 50.0, 29.8, 25.4, 24.2, 21.3; IR (KBr,  $cm^{-1}$ ):  $\nu$  3332, 2958, 2358, 1571, 1512, 1436, 1257, 1132, 1076, 879, 744; HRMS  $m/z$  (ESI) calculated for  $C_{17}H_{28}N_3O_2S$  (M+H) $^+$  338.1896 found 338.1907.

***N*-[*tert*-Butylamino-(4-methyl-piperidin-1-yl)-methylene]-4-methylbenzenesulfonamide (4h):**

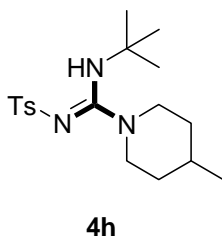

Following the general procedure, compound **4h** was prepared from *tert*-butyl isocyanide (57  $\mu$ L), *N,N*-dibromo-*p*-toluenesulfonamide (165 mg) and 4-methylpiperidine (59  $\mu$ L) in presence of  $K_2CO_3$  (2 equiv., 138 mg). Purified by column chromatography on silica gel (Petroleum ether: EtOAc = 4:1). Yellow oil (80%, 140.4 mg);  $^1H$  NMR ( $CDCl_3$ , 300 MHz):  $\delta$  7.75 (d,  $J = 8.1$  Hz, 2H), 7.19 (d,  $J = 8.1$  Hz, 2H), 5.16 (s, 1H), 3.92 (d,  $J = 13.2$  Hz, 2H), 2.92 (t,  $J = 12.6$  Hz,

2H), 2.34 (s, 3H), 1.65-1.54 (m, 3H), 1.32-1.20 (m, 2H), 1.13 (s, 9H), 0.92 (d,  $J = 6$  Hz, 3H);  $^{13}\text{C}$  NMR ( $\text{CDCl}_3$ , 75 MHz):  $\delta$  157.6, 141.7, 141.1, 128.8, 125.8, 53.8, 49.3, 33.5, 30.8, 29.7, 21.4, 21.3; IR (KBr,  $\text{cm}^{-1}$ ):  $\nu$  3330, 2953, 2365, 1576, 1511, 1440, 1241, 1137, 1080, 881, 739; HRMS  $m/z$  (ESI) calculated for  $\text{C}_{18}\text{H}_{30}\text{N}_3\text{O}_2\text{S}$  ( $\text{M}+\text{H}$ ) $^+$  352.2053 found 352.2058.

***N*-(*tert*-Butylamino-morpholin-4-yl-methylene)-4-methylbenzenesulfonamide (4i):**

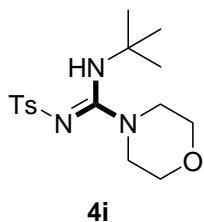

Following the general procedure, compound **4i** was prepared from *tert*-butyl isocyanide (57  $\mu\text{L}$ ), *N,N*-dibromo-*p*-toluenesulfonamide (165 mg) and morpholine (43  $\mu\text{L}$ ) in presence of  $\text{K}_2\text{CO}_3$  (2 equiv., 138 mg). Purified by column chromatography on silica gel (Petroleum ether: EtOAc = 7:3). White solid (82%, 138.9 mg); mp 159-161  $^\circ\text{C}$ ;  $^1\text{H}$  NMR ( $\text{CDCl}_3$ , 300 MHz):  $\delta$  7.77 (d,  $J = 8.4$  Hz, 2H), 7.23 (d,  $J = 7.8$  Hz, 2H), 5.20 (s, 1H), 3.77 (t,  $J = 4.8$  Hz, 4H), 3.49 (t,  $J = 4.8$  Hz, 4H), 2.38 (s, 3H), 1.17 (s, 9H);  $^{13}\text{C}$  NMR ( $\text{CDCl}_3$ , 75 MHz):  $\delta$  157.6, 141.5, 141.3, 129.0, 125.9, 66.2, 54.1, 49.2, 29.7, 21.4; IR (KBr,  $\text{cm}^{-1}$ ):  $\nu$  3410, 2970, 2358, 1570, 1517, 1450, 1274, 1138, 1078, 883, 705; HRMS  $m/z$  (ESI) calculated for  $\text{C}_{16}\text{H}_{26}\text{N}_3\text{O}_3\text{S}$  ( $\text{M}+\text{H}$ ) $^+$  340.1689 found 340.1701.

***N*-[*(*Benzyl-prop-2-ynyl-amino)-*tert*-butylamino-methylene]-4-methylbenzenesulfonamide (4j):**

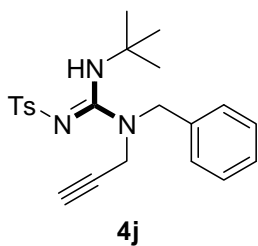

Following the general procedure, compound **4j** was prepared from *tert*-butyl isocyanide (57  $\mu\text{L}$ ), *N,N*-dibromo-*p*-toluenesulfonamide (165 mg) and *N*-propargyl benzylamine (73 mg) in presence of  $\text{K}_2\text{CO}_3$  (2 equiv., 138 mg). Purified by column chromatography on silica gel (Petroleum ether: EtOAc = 4:1). Colorless semi solid (71%, 140.9 mg);  $^1\text{H}$  NMR ( $\text{CDCl}_3$ , 300 MHz):  $\delta$  7.79 (d,  $J = 7.8$  Hz, 2H), 7.37-7.29 (m, 5H), 7.23 (d,  $J = 8.1$  Hz, 2H), 5.54 (s, 1H), 4.69 (s, 2H), 4.14 (d,  $J = 2.4$  Hz, 2H), 2.39 (s, 3H), 2.33-2.31 (m, 1H), 1.15 (s, 9 H);  $^{13}\text{C}$  NMR ( $\text{CDCl}_3$ , 75 MHz):  $\delta$  157.6, 141.5, 141.3, 135.3, 128.9, 128.6, 128.5, 127.9, 125.9, 54.4, 54.0, 39.9, 29.5, 21.3; IR (KBr,  $\text{cm}^{-1}$ ):  $\nu$  3353, 2924, 2374, 2067, 1593, 1413, 1382, 1267, 1078, 754; HRMS  $m/z$  (ESI) calculated for  $\text{C}_{22}\text{H}_{28}\text{N}_3\text{O}_2\text{S}$  ( $\text{M}+\text{H}$ ) $^+$  398.1896 found 398.1894.



***N*-(*tert*-Butylamino-(prop-2-ynyl-*p*-tolyl-amino)-methylene]-4-methylbenzenesulfonamide (4k):**

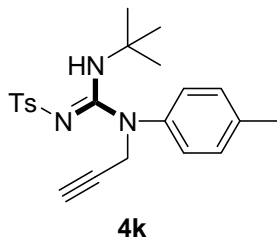

Following the general procedure, compound **4k** was prepared from *tert*-butyl isocyanide (57  $\mu$ L), *N,N*-dibromo-*p*-toluenesulfonamide (165 mg) and *N*-propargyl-*p*-tolylamine (73 mg) in presence of  $K_2CO_3$  (2 equiv., 138 mg). Purified by column chromatography on silica gel (Petroleum ether: EtOAc = 4:1). Colorless semi solid (69%, 136.9 mg);  $^1H$  NMR ( $CDCl_3$ , 300 MHz):  $\delta$  7.83 (d,  $J = 7.8$  Hz, 2H), 7.23 (d,  $J = 7.5$  Hz, 2H), 7.14 (s, br, 4H), 5.95 (s, 1H), 4.57 (s, 2H), 2.38 (s, 3H), 2.22 (s, 1H), 0.95 (s, 9 H);  $^{13}C$  NMR ( $CDCl_3$ , 75 MHz):  $\delta$  156.9, 141.7, 141.3, 140.8, 136.7, 130.1, 128.9, 126.2, 125.4, 79.0, 73.2, 54.5, 43.1, 29.3, 21.3, 20.9; IR (KBr,  $cm^{-1}$ ):  $\nu$  3339, 2941, 2362, 2066, 1581, 1377, 1254, 1073, 749; HRMS  $m/z$  (ESI) calculated for  $C_{22}H_{28}N_3O_2S$  (M+H) $^+$  398.1896 found 398.1903.

***N*-[*(*Allyl-benzyl-amino)-*tert*-butylamino-methylene]-4-methylbenzenesulfonamide (4l):**

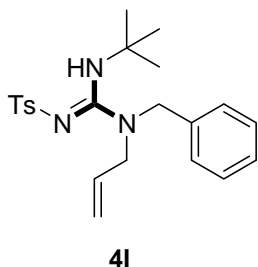

Following the general procedure, compound **4l** was prepared from *tert*-butyl isocyanide (57  $\mu$ L), *N,N*-dibromo-*p*-toluenesulfonamide (165 mg) and *N*-allyl benzylamine (74 mg) in presence of  $K_2CO_3$  (2 equiv., 138 mg). Purified by column chromatography on silica gel (Petroleum ether: EtOAc = 4:1). Pale yellow oil (65%, 129.6 mg);  $^1H$  NMR ( $CDCl_3$ , 300 MHz):  $\delta$  7.80 (d,  $J = 8.4$  Hz, 2H), 7.34-7.28 (m, 5H), 7.22 (d,  $J = 8.1$  Hz, 2H), 5.85-5.72 (m, 1H), 5.21 (d,  $J = 8.7$  Hz, 1H), 5.13 (d,  $J = 13.8$  Hz, 1H), 4.62 (s, 2H), 4.05 (d,  $J = 6.3$  Hz, 2H), 2.38 (s, 3H) 1.05 (s, 9 H);  $^{13}C$  NMR ( $CDCl_3$ , 75 MHz):  $\delta$  156.8, 142.0, 141.0, 136.1, 133.4, 128.8, 128.6, 127.9, 127.7, 125.8, 119.4, 53.9, 53.68, 53.60, 29.3, 21.3; IR (KBr,  $cm^{-1}$ ):  $\nu$  3327, 2929, 2381, 1644, 1505, 1389, 1251, 1070, 737; HRMS  $m/z$  (ESI) calculated for  $C_{22}H_{30}N_3O_2S$  (M+H) $^+$  400.2053 found 400.2041.

***N*-[*tert*-Butylamino-(4-hydroxy-piperidin-1-yl)-methylene]-4-methylbenzenesulfonamide (4m):**

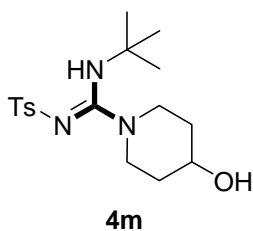

Following the general procedure, compound **4m** was prepared from *tert*-butyl isocyanide (57  $\mu$ L), *N,N*-dibromo-*p*-toluenesulfonamide (165 mg) and 4-hydroxypiperidine (51 mg) in presence of  $K_2CO_3$  (2 equiv., 138 mg).

Purified by column chromatography on silica gel (Petroleum ether: EtOAc = 1:1). Yellow oil (72%, 127.0 mg); **<sup>1</sup>H NMR (CDCl<sub>3</sub>, 300 MHz)**: δ 7.77 (d, *J* = 8.1 Hz, 2H), 7.23 (d, *J* = 7.8 Hz, 2H), 5.24 (s, 1H), 3.95-3.93 (m, 1H), 3.80-3.74 (m, 2H), 3.30-3.23 (m, 2H), 2.38 (s, 3H), 1.99-1.96 (m, 3H), 1.70-1.63 (m, 2H), 1.17 (s, 9H); **<sup>13</sup>C NMR (CDCl<sub>3</sub>, 75 MHz)**: δ 157.8, 141.5, 141.4, 128.9, 125.9, 66.7, 54.2, 46.1, 33.5, 29.8, 21.4; **IR (KBr, cm<sup>-1</sup>)**: ν 3445, 3327, 2944, 2360, 1587, 1448, 1259, 1053, 855, 756; **HRMS m/z (ESI)** calculated for C<sub>17</sub>H<sub>28</sub>N<sub>3</sub>O<sub>3</sub>S (M+H)<sup>+</sup> 354.1845 found 354.1853.

***N*-[(Benzyl-methyl-amino)-*tert*-butylamino-methylene]-4-methylbenzenesulfonamide (4n):**

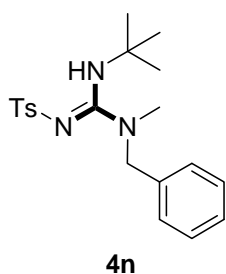

Following the general procedure, compound **4n** was prepared from *tert*-butyl isocyanide (57 μL), *N,N*-dibromo-*p*-toluenesulfonamide (165 mg) and *N*-methyl benzylamine (64 μL) in presence of K<sub>2</sub>CO<sub>3</sub> (2 equiv., 138 mg). Purified by column chromatography on silica gel (Petroleum ether: EtOAc = 4:1). Colorless semi solid (79%, 147.3 mg); **<sup>1</sup>H NMR (CDCl<sub>3</sub>, 300 MHz)**: δ 7.79 (d, *J* = 8.1 Hz, 2H), 7.36-7.29 (m, 3H), 7.24-7.19 (m, 4H), 5.03 (s, 1H),

4.58 (s, 2H), 3.04 (s, 3H), 2.36 (s, 3H), 1.08 (s, 9H); **<sup>13</sup>C NMR (CDCl<sub>3</sub>, 75 MHz)**: δ 157.3, 142.0, 141.1, 135.6, 128.8, 127.7, 127.4, 125.7, 56.0, 53.6, 39.3, 29.5, 21.3; **IR (KBr, cm<sup>-1</sup>)**: ν 3352, 2968, 2360, 1570, 1510, 1440, 1263, 1136, 1091, 887, 743; **HRMS m/z (ESI)** calculated for C<sub>20</sub>H<sub>28</sub>N<sub>3</sub>O<sub>2</sub>S (M+H)<sup>+</sup> 374.1896 found 374.1897.

***N*-(*tert*-Butylamino-phenylamino-methylene)-4-methylbenzenesulfonamide (4o):<sup>5</sup>**

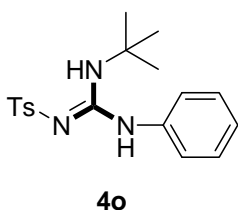

Following the general procedure, compound **4o** was prepared from *tert*-butyl isocyanide (57 μL), *N,N*-dibromo-*p*-toluenesulfonamide (165 mg) and aniline (46 μL) in presence of KF (2 equiv., 58 mg). Purified by column chromatography on silica gel (Petroleum ether: EtOAc = 4:1). White solid

(47%, 81.0 mg); mp 93-95 °C; **<sup>1</sup>H NMR (CDCl<sub>3</sub>, 300 MHz)**: δ 8.87 (s, 1H), 7.82 (t, *J* = 6.9 Hz, 2H), 7.40 (t, *J* = 7.8 Hz, 2H), 7.30-7.24 (m, 3H), 7.11 (d, *J* = 7.5 Hz, 2H), 4.68 (s, 1H), 2.40 (s, 3H), 1.29 (s, 9H); **<sup>13</sup>C NMR (CDCl<sub>3</sub>, 75 MHz)**: δ 152.8, 141.8, 140.8, 135.7, 130.1, 129.1, 127.2, 125.8, 125.5, 52.5, 29.1, 21.4; **IR (KBr, cm<sup>-1</sup>)**: ν 3315, 3009, 2971, 2368, 1634, 1444, 1237, 1054, 766.

***N*-(*tert*-Butylamino-*p*-tolylamino-methylene)-4-methylbenzenesulfonamide (**4p**):<sup>6</sup>**

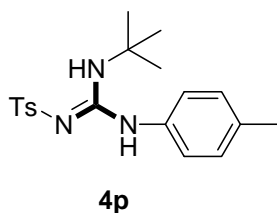

Following the general procedure, compound **4p** was prepared from *tert*-butyl isocyanide (57  $\mu$ L), *N,N*-dibromo-*p*-toluenesulfonamide (165 mg) and *p*-toluidine (54 mg) in presence of KF (2 equiv., 58 mg). Purified by column chromatography on silica gel (Petroleum ether: EtOAc = 4:1). White solid (54%, 96.9 mg); mp 129-131  $^{\circ}$ C;  $^1\text{H NMR}$  ( $\text{CDCl}_3$ , 300 MHz):  $\delta$  8.77 (s, 1H), 7.83 (d,  $J$  = 8.4 Hz, 2H), 7.25 (d,  $J$  = 8.1 Hz, 2H), 7.18 (d,  $J$  = 8.4 Hz, 2H), 6.99 (d,  $J$  = 8.1 Hz, 2H), 4.62 (s, 1H), 2.40 (s, 3H), 2.34 (s, 3H), 1.28 (s, 9H);  $^{13}\text{C NMR}$  ( $\text{CDCl}_3$ , 75 MHz):  $\delta$  153.2, 141.7, 140.9, 137.4, 132.8, 130.6, 129.0, 125.8, 125.7, 52.4, 29.1, 21.4, 20.9; IR (KBr,  $\text{cm}^{-1}$ ):  $\nu$  3345, 2983, 2365, 1622, 1439, 1248, 1055, 844, 751.

***N*-(*tert*-Butylamino-(4-*tert*-butyl-phenylamino)-methylene)-4-methylbenzenesulfonamide (**4q**):<sup>6</sup>**

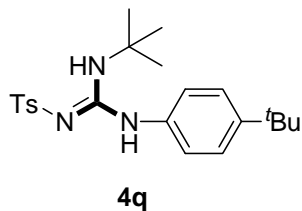

Following the general procedure, compound **4q** was prepared from *tert*-butyl isocyanide (57  $\mu$ L), *N,N*-dibromo-*p*-toluenesulfonamide (165 mg) and 4-*t*-butylaniline (80  $\mu$ L) in presence of KF (2 equiv., 58 mg). Purified by column chromatography on silica gel (Petroleum ether: EtOAc = 4:1). Colorless oil (57%, 114.2 mg);  $^1\text{H NMR}$  ( $\text{CDCl}_3$ , 300 MHz):  $\delta$  8.80 (s, 1H), 7.83 (d,  $J$  = 8.1 Hz, 2H), 7.40 (d,  $J$  = 8.7 Hz, 2H), 7.25 (d,  $J$  = 7.5 Hz, 2H), 7.03 (d,  $J$  = 8.4 Hz, 2H), 4.71 (s, 1H), 2.40 (s, 3H), 1.31-1.30 (m, 18H);  $^{13}\text{C NMR}$  ( $\text{CDCl}_3$ , 75 MHz):  $\delta$  152.9, 150.3, 141.6, 140.9, 132.8, 128.9, 126.8, 125.8, 125.0, 52.3, 34.4, 31.1, 29.1, 21.3; IR (KBr,  $\text{cm}^{-1}$ ):  $\nu$  3331, 2976, 2380, 1655, 1428, 1211, 1063, 851, 755.

***N*-(*tert*-Butylamino-(4-methoxy-phenylamino)-methylene)-4-methylbenzenesulfonamide (**4r**):<sup>6</sup>**

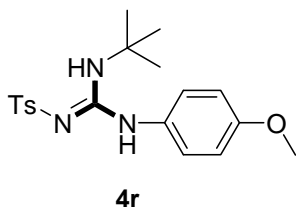

Following the general procedure, compound **4r** was prepared from *tert*-butyl isocyanide (57  $\mu$ L), *N,N*-dibromo-*p*-toluenesulfonamide (165 mg) and *p*-anisidine (57 mg) in presence of KF (2 equiv., 58 mg). Purified by column chromatography on silica gel (Petroleum ether: EtOAc = 4:1). Colorless semi solid (52%, 97.5 mg);  $^1\text{H NMR}$  ( $\text{CDCl}_3$ , 300 MHz):  $\delta$  8.70 (s, 1H), 7.83 (d,  $J$  = 7.8 Hz, 2H), 7.26 (d,  $J$  = 7.5 Hz, 2H), 7.04 (d,  $J$  = 8.7 Hz, 2H), 6.90 (d,  $J$  = 8.7 Hz, 2H), 4.47

(s, 1H), 3.81 (s, 3H), 2.41 (s, 3H), 1.27 (s, 9H);  $^{13}\text{C}$  NMR ( $\text{CDCl}_3$ , 75 MHz):  $\delta$  158.8, 153.6, 141.7, 141.0, 129.0, 128.0, 127.8, 125.8, 115.2, 55.4, 52.4, 29.2, 21.4; IR (KBr,  $\text{cm}^{-1}$ ):  $\nu$  3357, 2994, 2366, 1635, 1441, 1230, 1054, 749.

***N*-[(4-Bromo-phenylamino)-*tert*-butylamino-methylene]-4-methylbenzenesulfonamide (4s):<sup>6</sup>**

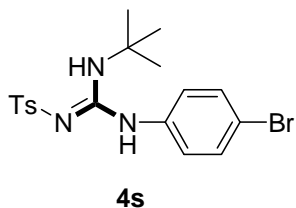

**4s**

Following the general procedure, compound **4s** was prepared from *tert*-butyl isocyanide (57  $\mu\text{L}$ ), *N,N*-dibromo-*p*-toluenesulfonamide (165 mg) and 4-bromoaniline (86 mg) in presence of KF (2 equiv., 58 mg).

Purified by column chromatography on silica gel (Petroleum ether: EtOAc = 4:1). White solid (43%, 91.1 mg); mp 98-100  $^{\circ}\text{C}$ ;  $^1\text{H}$  NMR ( $\text{CDCl}_3$ , 300 MHz):  $\delta$  8.80 (s, 1H), 7.81 (d,  $J$  = 8.4 Hz, 2H), 7.51 (d,  $J$  = 8.7 Hz, 2H), 7.25 (d,  $J$  = 7.8 Hz, 2H), 7.00 (d,  $J$  = 8.7 Hz, 2H), 4.63 (s, 1H), 2.40 (s, 3H), 1.30 (s, 9H);  $^{13}\text{C}$  NMR ( $\text{CDCl}_3$ , 75 MHz):  $\delta$  152.4, 141.9, 140.6, 134.8, 133.2, 129.1, 127.1, 125.8, 120.6, 52.7, 29.1, 21.4; IR (KBr,  $\text{cm}^{-1}$ ):  $\nu$  3337, 2985, 2369, 1640, 1422, 1238, 1031, 842, 750.

***N*-[(*tert*-Butylamino)-(4-fluoro-phenylamino)-methylene]-4-methylbenzenesulfonamide (4t):<sup>6</sup>**

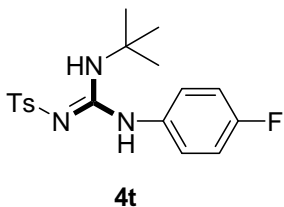

**4t**

Following the general procedure, compound **4t** was prepared from *tert*-butyl isocyanide (57  $\mu\text{L}$ ), *N,N*-dibromo-*p*-toluenesulfonamide (165 mg) and 4-fluoroaniline (47  $\mu\text{L}$ ) in presence of KF (2 equiv., 58 mg).

Purified by column chromatography on silica gel (Petroleum ether: EtOAc = 4:1). White solid (46%, 83.4 mg); mp 90-92  $^{\circ}\text{C}$ ;  $^1\text{H}$  NMR ( $\text{CDCl}_3$ , 300 MHz):  $\delta$  8.76 (s, 1H), 7.81 (d,  $J$  = 7.5 Hz, 2H), 7.25 (d,  $J$  = 7.8 Hz, 2H), 7.15-7.05 (m, 4H), 4.50 (s, 1H), 2.39 (s, 3H), 1.27 (s, 9H);  $^{13}\text{C}$  NMR ( $\text{CDCl}_3$ , 75 MHz):  $\delta$  161.3 ( $J_{\text{CF}}$  = 247.1 Hz), 153.0, 141.8, 140.7, 131.44, 131.40, 129.0 ( $J_{\text{CF}}$  = 3.3 Hz), 128.0 ( $J_{\text{CF}}$  = 8.7 Hz), 125.7, 116.9 ( $J_{\text{CF}}$  = 22.4 Hz), 52.5, 29.0, 21.3; IR (KBr,  $\text{cm}^{-1}$ ):  $\nu$  3319, 2990, 2372, 1636, 1438, 1221, 1023, 757.

***N*-[(3-Bromo-phenylamino)-*tert*-butylamino-methylene]-4-methylbenzenesulfonamide (4u):**

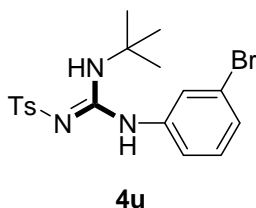

**4u**

Following the general procedure, compound **4u** was prepared from *tert*-butyl isocyanide (57  $\mu\text{L}$ ), *N,N*-dibromo-*p*-toluenesulfonamide (165 mg) and 3-bromoaniline (54  $\mu\text{L}$ ) in presence of KF (2 equiv., 58 mg). Purified

by column chromatography on silica gel (Petroleum ether: EtOAc = 4:1). Semi solid (42%, 89.0 mg); **<sup>1</sup>H NMR (CDCl<sub>3</sub>, 300 MHz):** δ 8.86 (s, 1H), 7.81 (d, *J* = 8.4 Hz, 2H), 7.41 (d, *J* = 6.9 Hz, 1H), 7.29-7.25 (m, 4H), 7.07 (d, *J* = 7.5 Hz, 1H), 4.71 (s, 1H), 2.41 (s, 3H), 1.31 (s, 9H); **<sup>13</sup>C NMR (CDCl<sub>3</sub>, 75 MHz):** δ 152.2, 141.9, 140.5, 137.1, 131.1, 130.0, 129.1, 128.2, 125.7, 123.7, 123.3, 52.7, 29.0, 21.3; **IR (KBr, cm<sup>-1</sup>):** ν 3331, 2983, 2376, 1621, 1444, 1219, 1042, 831, 745; **HRMS m/z (ESI)** calculated for C<sub>18</sub>H<sub>23</sub>BrN<sub>3</sub>O<sub>2</sub>S (M+H)<sup>+</sup> 424.0688 found 424.0693.

***N*-[*tert*-Butylamino-(pyridine-2-ylamino)-methylene]-4-methylbenzenesulfonamide (4v):**

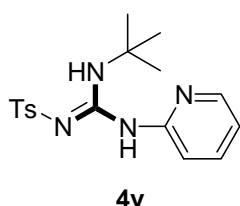

Following the general procedure, compound **4v** was prepared from *tert*-butyl isocyanide (57 μL), *N,N*-dibromo-*p*-toluenesulfonamide (165 mg) and 2-aminopyridine (47 mg) in presence of KF (3 equiv., 87 mg). Purified by column chromatography on silica gel (Petroleum ether: EtOAc = 4:1). Semi solid (22%, 38.0 mg); **<sup>1</sup>H NMR (CDCl<sub>3</sub>, 300 MHz):** δ 10.51 (s, 1H), 10.11 (s, 1H), 8.16 (d, *J* = 4.2 Hz, 1H), 7.81 (d, *J* = 8.4 Hz, 2H), 7.66 (t, *J* = 6.9 Hz, 1H), 7.24 (d, *J* = 9 Hz, 2H), 6.97 (t, *J* = 5.4 Hz, 1H), 6.81 (d, *J* = 8.4 Hz, 1H), 2.38 (s, 3H), 1.41 (s, 9H); **<sup>13</sup>C NMR (CDCl<sub>3</sub>, 75 MHz):** δ 152.5, 150.8, 145.7, 141.7, 141.2, 138.7, 129.1, 125.6, 118.0, 113.1, 52.3, 29.0, 21.4; **IR (KBr, cm<sup>-1</sup>):** ν 3342, 2977, 2371, 1645, 1381, 1223, 1051, 847, 752; **HRMS m/z (ESI)** calculated for C<sub>17</sub>H<sub>23</sub>N<sub>4</sub>O<sub>2</sub>S (M+H)<sup>+</sup> 347.1536 found 347.1545.

***N*-(*tert*-Butylamino-diethylamino-methylene)-benzenesulfonamide (5a):**

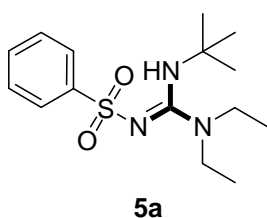

Following the general procedure, compound **5a** was prepared from *tert*-butyl isocyanide (57 μL), *N,N*-dibromobenzenesulfonamide (158 mg) and diethylamine (52 μL) in presence of K<sub>2</sub>CO<sub>3</sub> (2 equiv., 138 mg). Purified by column chromatography on silica gel (Petroleum ether: EtOAc = 7:3). Colorless semi solid (82%, 127.5 mg); **<sup>1</sup>H NMR (CDCl<sub>3</sub>, 300 MHz):** δ 7.81 (d, *J* = 7.5 Hz, 2H), 7.36-7.35 (m, 3H), 5.17 (s, 1H), 3.39 (q, *J* = 7.2 Hz, 4H), 1.10-1.05 (m, 15H); **<sup>13</sup>C NMR (CDCl<sub>3</sub>, 75 MHz):** δ 156.7, 144.6, 130.6, 128.0, 125.5, 53.5, 43.8, 29.4, 12.5; **IR (KBr, cm<sup>-1</sup>):** ν 3325, 2993, 2365, 1621, 1586, 1435, 1236, 1134, 1048, 734; **HRMS m/z (ESI)** calculated for C<sub>15</sub>H<sub>26</sub>N<sub>3</sub>O<sub>2</sub>S (M+H)<sup>+</sup> 312.1740 found 312.1755.

#### 4-Butyl-*N*-(*tert*-butylamino-diethylamino-methylene)-benzenesulfonamide (**5b**):

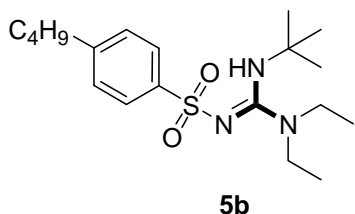

Following the general procedure, compound **5b** was prepared from *tert*-butyl isocyanide (57  $\mu\text{L}$ ), *N,N*-dibromo-4-butylbenzenesulfonamide (186 mg) and diethylamine (52  $\mu\text{L}$ ) in presence of  $\text{K}_2\text{CO}_3$  (2 equiv., 138 mg). Purified by column chromatography on silica gel (Petroleum ether: EtOAc = 4:1). Pale yellow oil (84%, 154.1 mg);  $^1\text{H NMR}$  ( $\text{CDCl}_3$ , 300 MHz):  $\delta$  7.78 (d,  $J = 8.1$  Hz, 2H), 7.20 (d,  $J = 8.1$  Hz, 2H), 5.25 (s, 1H), 3.45 (q,  $J = 6.6$  Hz, 4H), 2.61 (t,  $J = 7.5$  Hz, 2H), 1.59-1.56 (m, 2H), 1.34-1.29 (m, 3H), 1.23-1.12 (m, 14H), 0.89 (t,  $J = 7.2$  Hz, 3H);  $^{13}\text{C NMR}$  ( $\text{CDCl}_3$ , 75 MHz):  $\delta$  157.5, 146.0, 142.0, 128.2, 125.8, 54.0, 43.9, 35.3, 33.2, 29.7, 22.0, 13.8, 12.7; IR (KBr,  $\text{cm}^{-1}$ ):  $\nu$  3317, 2974, 2362, 1581, 1505, 1422, 1245, 1154, 1030, 810, 716; HRMS  $m/z$  (ESI) calculated for  $\text{C}_{19}\text{H}_{34}\text{N}_3\text{O}_2\text{S}$  ( $\text{M}+\text{H}$ ) $^+$  368.2366 found 368.2363.

#### *N*-(*tert*-Butylamino-diethylamino-methylene)-4-methoxybenzenesulfonamide (**5c**):

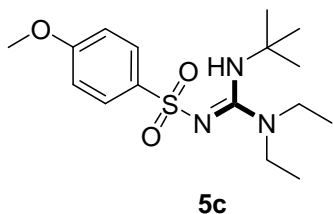

Following the general procedure, compound **5c** was prepared from *tert*-butyl isocyanide (57  $\mu\text{L}$ ), *N,N*-dibromo-4-methoxybenzenesulfonamide (173 mg) and diethylamine (52  $\mu\text{L}$ ) in presence of  $\text{K}_2\text{CO}_3$  (2 equiv., 138 mg). Purified by column chromatography on silica gel (Petroleum ether: EtOAc = 3:2). Colorless semi solid (81%, 138.1 mg);  $^1\text{H NMR}$  ( $\text{CDCl}_3$ , 300 MHz):  $\delta$  7.85 (d,  $J = 9$  Hz, 2H), 6.91 (d,  $J = 9$  Hz, 2H), 5.25 (s, 1H), 3.84 (s, 3H), 3.47 (q,  $J = 7.2$  Hz, 4H), 1.25-1.15 (m, 15H);  $^{13}\text{C NMR}$  ( $\text{CDCl}_3$ , 75 MHz):  $\delta$  161.3, 157.3, 137.0, 127.7, 113.2, 55.3, 53.9, 43.9, 29.7, 12.7; IR (KBr,  $\text{cm}^{-1}$ ):  $\nu$  3326, 2980, 2368, 1651, 1577, 1434, 1228, 1147, 757; HRMS  $m/z$  (ESI) calculated for  $\text{C}_{16}\text{H}_{28}\text{N}_3\text{O}_3\text{S}$  ( $\text{M}+\text{H}$ ) $^+$  342.1845 found 342.1845.

#### 4-Bromo-*N*-(*tert*-butylamino-diethylamino-methylene)-benzenesulfonamide (**5d**):

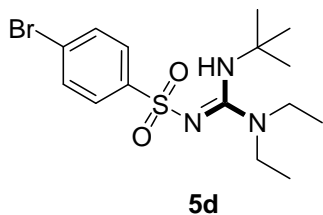

Following the general procedure, compound **5d** was prepared from *tert*-butyl isocyanide (57  $\mu\text{L}$ ), *N,N*-dibromo-4-bromobenzenesulfonamide (197 mg) and diethylamine (52  $\mu\text{L}$ ) in presence of  $\text{K}_2\text{CO}_3$  (2 equiv., 138 mg). Purified by column chromatography on silica gel (Petroleum ether: EtOAc = 7:3). White solid (81%, 157.9 mg); mp

102-104 °C;  $^1\text{H NMR}$  ( $\text{CDCl}_3$ , 300 MHz):  $\delta$  7.74 (d,  $J = 8.7$  Hz, 2H), 7.53 (d,  $J = 8.4$  Hz, 2H), 5.02 (s, 1H), 3.44 (q,  $J = 7.2$  Hz, 4H), 1.17-1.14 (m, 15H);  $^{13}\text{C NMR}$  ( $\text{CDCl}_3$ , 75 MHz):  $\delta$  156.5, 144.0, 131.3, 127.4, 125.1, 53.6, 43.9, 29.5, 12.7; **IR** (**KBr**,  $\text{cm}^{-1}$ ):  $\nu$  3345, 2970, 2359, 1584, 1446, 1268, 1109, 1056, 854, 742; **HRMS m/z** (**ESI**) calculated for  $\text{C}_{15}\text{H}_{25}\text{BrN}_3\text{O}_2\text{S}$  ( $\text{M}+\text{H}$ ) $^+$  390.0845 found 390.0843.

***N*-(*tert*-Butylamino-diethylamino-methylene)-4-nitrobenzenesulfonamide (5e):**

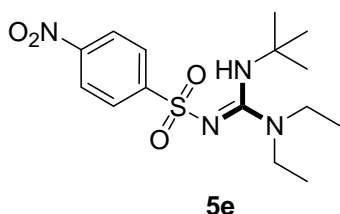

Following the general procedure, compound **5e** was prepared from *tert*-butyl isocyanide (57  $\mu\text{L}$ ), *N,N*-dibromo-4-nitrobenzenesulfonamide (180 mg) and diethylamine (52  $\mu\text{L}$ ) in presence of  $\text{K}_2\text{CO}_3$  (2 equiv., 138 mg). Purified by column chromatography on silica gel (Petroleum ether: EtOAc = 1:1). Yellow solid (79%, 140.6 mg); mp 108-110 °C;  $^1\text{H NMR}$  ( $\text{CDCl}_3$ , 300 MHz):  $\delta$  8.27 (d,  $J = 8.7$  Hz, 2H), 8.06 (d,  $J = 9$  Hz, 2H), 4.87 (s, 1H), 3.49 (q,  $J = 6.9$  Hz, 4H), 1.20 (t,  $J = 7.2$  Hz, 6H), 1.13 (s, 9H);  $^{13}\text{C NMR}$  ( $\text{CDCl}_3$ , 75 MHz):  $\delta$  156.9, 150.6, 148.6, 126.9, 123.6, 53.4, 44.0, 29.4, 12.7; **IR** (**KBr**,  $\text{cm}^{-1}$ ):  $\nu$  3359, 2961, 2363, 1644, 1599, 1469, 1363, 1282, 1087, 878, 756; **HRMS m/z** (**ESI**) calculated for  $\text{C}_{15}\text{H}_{25}\text{N}_4\text{O}_4\text{S}$  ( $\text{M}+\text{H}$ ) $^+$  357.1591 found 357.1600.

***N*-(*tert*-Butylamino-diethylamino-methylene)-2-methylbenzenesulfonamide (5f):**

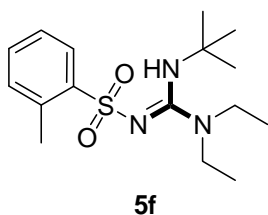

Following the general procedure, compound **5f** was prepared from *tert*-butyl isocyanide (57  $\mu\text{L}$ ), *N,N*-dibromo-*o*-toluenesulfonamide (165 mg) and diethylamine (52  $\mu\text{L}$ ) in presence of  $\text{K}_2\text{CO}_3$  (2 equiv., 138 mg). Purified by column chromatography on silica gel (Petroleum ether: EtOAc = 7:3). White solid (83%, 134.8 mg); mp 85-87 °C;  $^1\text{H NMR}$  ( $\text{CDCl}_3$ , 300 MHz):  $\delta$  7.94 (d,  $J = 7.8$  Hz, 1H), 7.32-7.29 (m, 1H), 7.25-7.20 (m, 2H), 5.22 (s, 1H), 3.45 (q,  $J = 7.2$  Hz, 4H), 2.73 (s, 3H) 1.31-1.13 (m, 15H);  $^{13}\text{C NMR}$  ( $\text{CDCl}_3$ , 75 MHz):  $\delta$  157.6, 142.7, 136.6, 131.7, 130.9, 126.6, 125.2, 53.9, 43.9, 29.8, 20.4, 12.8; **IR** (**KBr**,  $\text{cm}^{-1}$ ):  $\nu$  3315, 2978, 2370, 1560, 1507, 1423, 1228, 1178, 1016, 844, 748; **HRMS m/z** (**ESI**) calculated for  $\text{C}_{16}\text{H}_{28}\text{N}_3\text{O}_2\text{S}$  ( $\text{M}+\text{H}$ ) $^+$  326.1896 found 326.1891.

***N*-(*tert*-Butylamino-diethylamino-methylene)-2-fluorobenzenesulfonamide (5g):**

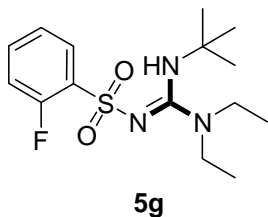

Following the general procedure, compound **5g** was prepared from *tert*-butyl isocyanide (57  $\mu$ L), *N,N*-dibromo-2-fluorobenzenesulfonamide (167 mg) and diethylamine (52  $\mu$ L) in presence of  $K_2CO_3$  (2 equiv., 138 mg). Purified by column chromatography on silica gel (Petroleum ether: EtOAc = 7:3). White solid (74%, 121.7 mg); mp 80-82  $^{\circ}C$ ;  $^1H$  NMR ( $CDCl_3$ , 300 MHz):  $\delta$  7.89-7.86 (m, 1H), 7.43-7.41 (m, 1H), 7.18-7.09 (m, 2H), 5.13 (s, 1H), 3.47 (q,  $J$  = 7.2 Hz, 4H), 1.18-1.14 (m, 15H);  $^{13}C$  NMR ( $CDCl_3$ , 75 MHz):  $\delta$  158.7 ( $J_{CF}$  = 252.6 Hz), 156.9, 132.9 ( $J_{CF}$  = 8.25 Hz), 132.5 ( $J_{CF}$  = 14.7 Hz), 128.2, 123.4, 116.5 ( $J_{CF}$  = 21.9 Hz), 53.8, 43.9, 29.6, 12.7; IR (KBr,  $cm^{-1}$ ):  $\nu$  3320, 2972, 2358, 1627, 1568, 1421, 1254, 1056, 852, 757; HRMS  $m/z$  (ESI) calculated for  $C_{15}H_{25}FN_3O_2S$  (M+H) $^+$  330.1646 found 330.1655.

***N*-(*tert*-Butylamino-diethylamino-methylene)-2-chlorobenzenesulfonamide (5h):**

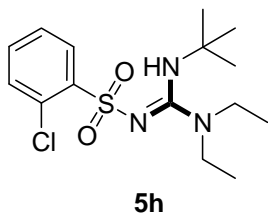

Following the general procedure, compound **5h** was prepared from *tert*-butyl isocyanide (57  $\mu$ L), *N,N*-dibromo-2-chlorobenzenesulfonamide (175 mg) and diethylamine (52  $\mu$ L) in presence of  $K_2CO_3$  (2 equiv., 138 mg). Purified by column chromatography on silica gel (Petroleum ether: EtOAc = 7:3). White solid (77%, 132.8 mg); mp 107-109  $^{\circ}C$ ;  $^1H$  NMR ( $CDCl_3$ , 300 MHz):  $\delta$  8.08-8.05 (m, 1H), 7.45 (d,  $J$  = 7.5 Hz, 1H), 7.36-7.29 (m, 2H), 5.10 (s, 1H), 3.48 (q,  $J$  = 7.2 Hz, 4H), 1.23-1.15 (m, 15H);  $^{13}C$  NMR ( $CDCl_3$ , 75 MHz):  $\delta$  157.2, 141.8, 131.78, 131.71, 131.3, 128.7, 126.2, 53.9, 43.9, 29.7, 12.7; IR (KBr,  $cm^{-1}$ ):  $\nu$  3329, 2977, 2363, 1577, 1503, 1454, 1238, 808, 743; HRMS  $m/z$  (ESI) calculated for  $C_{15}H_{25}ClN_3O_2S$  (M+H) $^+$  346.1350 found 346.1365.

***N*-(*tert*-Butylamino-diethylamino-methylene)-2-naphthylsulfonamide (5i):**

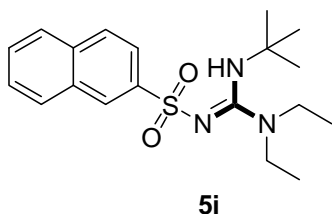

Following the general procedure, compound **5i** was prepared from *tert*-butyl isocyanide (57  $\mu$ L), *N,N*-dibromo-2-naphthalenesulfonamide (183 mg) and diethylamine (52  $\mu$ L) in presence of  $K_2CO_3$  (2 equiv., 138 mg). Purified by column chromatography on silica gel (Petroleum ether: EtOAc = 7:3). Colorless semi solid (80%, 144.4



mg); **<sup>1</sup>H NMR (CDCl<sub>3</sub>, 300 MHz)**: δ 8.43 (s, 1H), 7.95-7.88 (m, 4H), 7.57-7.54 (m, 2H), 5.16 (s, 1H), 3.50 (q, *J* = 7.2 Hz, 4H), 1.22-1.17 (m, 15H); **<sup>13</sup>C NMR (CDCl<sub>3</sub>, 75 MHz)**: δ 157.1, 141.7, 133.9, 132.0, 129.0, 128.4, 127.6, 126.7, 125.5, 122.7, 53.9, 44.0, 29.7, 12.7; **IR (KBr, cm<sup>-1</sup>)**: ν 3345, 2985, 2360, 1572, 1440, 1224, 1058, 826, 759; **HRMS m/z (ESI)** calculated for C<sub>19</sub>H<sub>28</sub>N<sub>3</sub>O<sub>2</sub>S (M+H)<sup>+</sup> 362.1896 found 362.1901.

***N*-(Diethylamino-pentylamino-methylene)-4-methylbenzenesulfonamide (6a):**

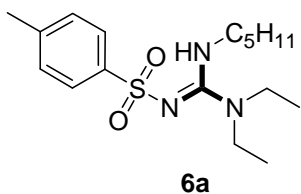

Following the general procedure, compound **6a** was prepared from 1-pentyl isocyanide (67 μL), *N,N*-dibromo-*p*-toluenesulfonamide (165 mg) and diethylamine (52 μL) in presence of K<sub>2</sub>CO<sub>3</sub> (2 equiv., 138 mg). Purified by column chromatography on silica gel (Petroleum ether: EtOAc = 4:1). White solid (83%, 140.6 mg); mp 67-69 °C; **<sup>1</sup>H NMR (CDCl<sub>3</sub>, 300 MHz)**: δ 7.75 (d, *J* = 7.8 Hz, 2H), 7.21 (d, *J* = 8.1 Hz, 2H), 6.62 (s, 1H), 3.26 (q, *J* = 7.2 Hz, 4H), 3.05 (q, *J* = 5.4 Hz, 2H), 2.37 (s, 3H), 1.44-1.43 (m, 2H), 1.24 (s, br, 4H), 1.11-1.06 (m, 6H), 0.85 (t, *J* = 6.3 Hz, 3H); **<sup>13</sup>C NMR (CDCl<sub>3</sub>, 75 MHz)**: δ 159.8, 141.5, 141.2, 129.0, 125.9, 46.1, 43.1, 29.9, 28.6, 22.1, 21.3, 13.8, 13.0; **IR (KBr, cm<sup>-1</sup>)**: ν 3332, 2931, 2362, 1577, 1502, 1429, 1253, 1138, 1085, 871, 810, 709; **HRMS m/z (ESI)** calculated for C<sub>17</sub>H<sub>30</sub>N<sub>3</sub>O<sub>2</sub>S (M+H)<sup>+</sup> 340.2053 found 340.2041.

***N*-(Diethylamino-isopropylamino-methylene)-4-methylbenzenesulfonamide (6b):**

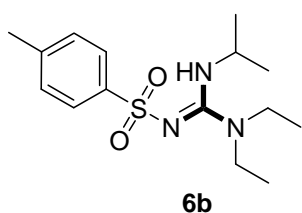

Following the general procedure, compound **6b** was prepared from isopropyl isocyanide (47 μL), *N,N*-dibromo-*p*-toluenesulfonamide (165 mg) and diethylamine (52 μL) in presence of K<sub>2</sub>CO<sub>3</sub> (2 equiv., 138 mg). Purified by column chromatography on silica gel (Petroleum ether: EtOAc = 4:1). Colorless semi solid (79%, 122.8 mg); **<sup>1</sup>H NMR (CDCl<sub>3</sub>, 300 MHz)**: δ 7.73 (d, *J* = 8.4 Hz, 2H), 7.18 (d, *J* = 8.1 Hz, 2H), 6.36 (d, *J* = 8.7 Hz, 1H), 3.57-3.50 (m, 1H), 3.25 (q, *J* = 7.2 Hz, 4H), 2.33 (s, 3H), 1.07-1.01 (m, 12H); **<sup>13</sup>C NMR (CDCl<sub>3</sub>, 75 MHz)**: δ 158.8, 141.4, 141.2, 128.8, 125.9, 47.4, 43.2, 23.1, 21.2, 12.8; **IR (KBr, cm<sup>-1</sup>)**: ν 3321, 2960, 2358, 1561, 1443, 1218, 1071, 858, 702; **HRMS m/z (ESI)** calculated for C<sub>15</sub>H<sub>26</sub>N<sub>3</sub>O<sub>2</sub>S (M+H)<sup>+</sup> 312.1740 found 312.1729.

***N*-(Cyclohexylamino-diethylamino-methylene)-4-methylbenzenesulfonamide (6c):**

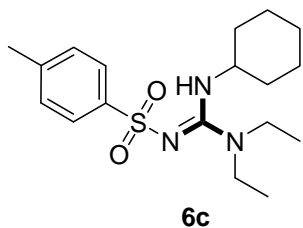

Following the general procedure, compound **6c** was prepared from cyclohexyl isocyanide (62  $\mu$ L), *N,N*-dibromo-*p*-toluenesulfonamide (165 mg) and diethylamine (52  $\mu$ L) in presence of  $K_2CO_3$  (2 equiv., 138 mg). Purified by column chromatography on silica gel (Petroleum ether: EtOAc = 3:2). Colorless semi solid (80%, 140.4 mg);  $^1H$  NMR ( $CDCl_3$ , 300 MHz):  $\delta$  7.75 (d,  $J$  = 8.4 Hz, 2H), 7.20 (d,  $J$  = 7.8 Hz, 2H), 6.45 (d,  $J$  = 9 Hz, 1H), 3.27 (q,  $J$  = 7.2 Hz, 4H), 3.14-3.11 (m, 1H), 2.35 (s, 3H), 1.78-1.66 (m, 4H), 1.56-1.54 (m, 1H), 1.22-1.05 (m, 11H);  $^{13}C$  NMR ( $CDCl_3$ , 75 MHz):  $\delta$  158.8, 141.5, 141.2, 128.9, 125.9, 54.6, 43.5, 33.5, 25.0, 24.8, 21.3, 12.8; IR (KBr,  $cm^{-1}$ ):  $\nu$  3309, 2972, 2365, 1568, 1451, 1232, 1068, 855, 749; HRMS  $m/z$  (ESI) calculated for  $C_{18}H_{30}N_3O_2S$  ( $M+H$ ) $^+$  352.2053 found 352.2055.

**{[Diethylamino-(toluene-4-sulfonylimino)-methyl]-amino}-acetic acid ethyl ester (6d):**

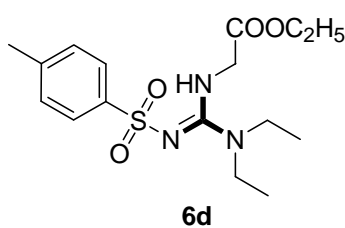

Following the general procedure, compound **6d** was prepared from ethyl isocyanoacetate (55  $\mu$ L), *N,N*-dibromo-*p*-toluenesulfonamide (165 mg) and diethylamine (52  $\mu$ L) in presence of  $K_2CO_3$  (2 equiv., 138 mg). Purified by column chromatography on silica gel (Petroleum ether: EtOAc = 2:3). Semi solid (70%, 124.2 mg);  $^1H$  NMR ( $CDCl_3$ , 300 MHz):  $\delta$  7.78 (d,  $J$  = 7.8 Hz, 2H), 7.20 (d,  $J$  = 8.1 Hz, 2H), 6.26 (s, 1H), 4.24-4.16 (m, 4H), 3.27 (q,  $J$  = 7.2 Hz, 4H), 2.36 (s, 3H), 1.26 (t,  $J$  = 7.2 Hz, 3H), 1.08 (t,  $J$  = 7.2 Hz, 6H);  $^{13}C$  NMR ( $CDCl_3$ , 75 MHz):  $\delta$  169.9, 156.4, 142.2, 141.2, 128.9, 125.6, 61.8, 46.7, 43.3, 21.3, 14.0, 12.9; IR (KBr,  $cm^{-1}$ ):  $\nu$  3332, 2981, 2357, 1761, 1589, 1455, 1248, 1057, 841, 751, 713; HRMS  $m/z$  (ESI) calculated for  $C_{16}H_{26}N_3O_4S$  ( $M+H$ ) $^+$  356.1638 found 356.1638.

***N*-[Diethylamino-(2-ethyl-6-methyl-phenylamino)-methylene]-4-methylbenzenesulfonamide (6e):**

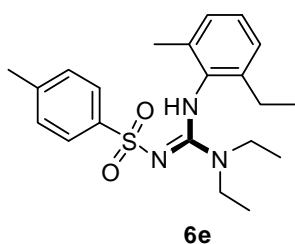

Following the general procedure, compound **6e** was prepared from 2-ethyl-6-methyl isocyanobenzene (194 mg), *N,N*-dibromo-*p*-toluenesulfonamide (165 mg) and diethylamine (52  $\mu$ L) in presence of  $K_2CO_3$  (2 equiv., 138 mg). Purified by column chromatography on silica gel (Petroleum ether: EtOAc = 4:1). Brown oil (76%, 147.0 mg);

**<sup>1</sup>H NMR (CDCl<sub>3</sub>, 300 MHz):** δ 8.51 (s, 1H), 7.83 (d, *J* = 8.1 Hz, 2H), 7.23 (d, *J* = 8.4 Hz, 2H), 7.11 (t, *J* = 7.5 Hz, 2H), 7.01-6.99 (m, 1H), 3.08 (s, br, 4H), 2.49-2.39 (m, 5H), 1.93 (s, 3H), 1.13 (t, *J* = 7.5 Hz, 3H), 0.87-0.85 (m, 6H); **<sup>13</sup>C NMR (CDCl<sub>3</sub>, 75 MHz):** δ 156.0, 141.9, 140.6, 139.4, 135.6, 134.0, 129.0, 128.8, 127.0, 126.6, 126.4, 42.9, 24.3, 21.4, 18.4, 13.9, 12.5; **IR (KBr, cm<sup>-1</sup>):** ν 3318, 2977, 2361, 1655, 1606, 1366, 1257, 1081, 736; **HRMS m/z (ESI)** calculated for C<sub>21</sub>H<sub>30</sub>N<sub>3</sub>O<sub>2</sub>S (M+H)<sup>+</sup> 388.2053 found 388.2057.

***N*-(*tert*-Butylamino-dibutylamino-methylene)-benzenesulfonamide (6f):**

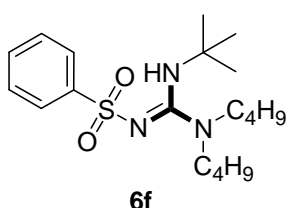

Following the general procedure, compound **6f** was prepared from *tert*-butyl isocyanide (57 μL), *N,N*-dibromobenzenesulfonamide (158 mg) and di-*n*-butylamine (84 μL) in presence of K<sub>2</sub>CO<sub>3</sub> (2 equiv., 138 mg). Purified by column chromatography on silica gel (Petroleum ether: EtOAc = 4:1). Colorless semi solid (79%, 144.9 mg); **<sup>1</sup>H NMR (CDCl<sub>3</sub>, 300 MHz):** δ 7.88-7.85 (m, 2H), 7.40-7.38 (m, 3H), 5.28 (s, 1H), 3.34 (t, *J* = 7.2 Hz, 4H), 1.52-1.45 (m, 4H), 1.29-1.21 (m, 4H), 1.16 (s, 9H), 0.86 (t, *J* = 7.5 Hz, 6H); **<sup>13</sup>C NMR (CDCl<sub>3</sub>, 75 MHz):** δ 157.8, 144.7, 130.7, 128.1, 125.7, 54.0, 49.6, 29.7, 29.6, 19.8, 13.6; **IR (KBr, cm<sup>-1</sup>):** ν 3341, 2967, 2360, 1580, 1443, 1237, 1124, 1060, 711; **HRMS m/z (ESI)** calculated for C<sub>19</sub>H<sub>34</sub>N<sub>3</sub>O<sub>2</sub>S (M+H)<sup>+</sup> 368.2366 found 368.2368

***N*-(*tert*-Butylamino-pyrrolidin-1-yl-methylene)-benzenesulfonamide (6g):**

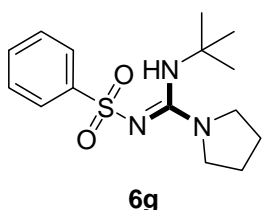

Following the general procedure, compound **6g** was prepared from *tert*-butyl isocyanide (57 μL), *N,N*-dibromobenzenesulfonamide (158 mg) and pyrrolidine (41 μL) in presence of K<sub>2</sub>CO<sub>3</sub> (2 equiv., 138 mg). Purified by column chromatography on silica gel (Petroleum ether: EtOAc = 3:2). Pale yellow solid (73%, 112.7 mg); mp 150-152 °C; **<sup>1</sup>H NMR (CDCl<sub>3</sub>, 300 MHz):** δ 7.91-7.88 (m, 2H), 7.41-7.39 (m, 3H), 4.50 (s, 1H), 3.60 (t, *J* = 6 Hz, 4H), 1.96-1.89 (m, 4H), 1.09 (s, 9H); **<sup>13</sup>C NMR (CDCl<sub>3</sub>, 75 MHz):** δ 152.4, 145.5, 130.3, 128.1, 125.5, 52.6, 49.6, 29.2, 25.3; **IR (KBr, cm<sup>-1</sup>):** ν 3337, 2972, 2358, 1562, 1451, 1257, 1138, 1059, 851, 747 711; **HRMS m/z (ESI)** calculated for C<sub>15</sub>H<sub>24</sub>N<sub>3</sub>O<sub>2</sub>S (M+H)<sup>+</sup> 310.1583 found 310.1575.

***N*-(*tert*-Butylamino-morpholin-4-yl-methylene)-benzenesulfonamide (6h):**

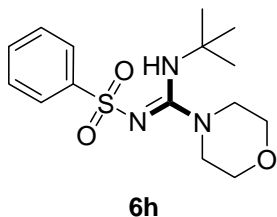

Following the general procedure, compound **6h** was prepared from *tert*-butyl isocyanide (57  $\mu$ L), *N,N*-dibromobenzenesulfonamide (158 mg) and morpholine (43  $\mu$ L) in presence of  $K_2CO_3$  (2 equiv., 138 mg). Purified by column chromatography on silica gel (Petroleum ether: EtOAc = 3:2). White solid (81%, 131.6 mg); mp 173-175  $^{\circ}C$ ;  $^1H$  NMR ( $CDCl_3$ , 300 MHz):  $\delta$  7.91-7.88 (m, 2H), 7.46-7.42 (m, 3H), 5.12 (s, 1H), 3.78 (t,  $J$  = 4.8 Hz, 4H), 3.51 (t,  $J$  = 4.8 Hz, 4H), 1.16 (s, 9H);  $^{13}C$  NMR ( $CDCl_3$ , 75 MHz):  $\delta$  157.4, 144.2, 131.1, 128.4, 125.8, 66.2, 54.0, 49.2, 29.6; IR (KBr,  $cm^{-1}$ ):  $\nu$  3392, 2981, 2377, 1581, 1437, 1246, 1117, 1063, 869, 719; HRMS  $m/z$  (ESI) calculated for  $C_{15}H_{24}N_3O_3S$  ( $M+H$ ) $^+$  326.1532 found 326.1534.

***N*-[*(*Benzyl-methyl-amino)-*tert*-butylamino-methylene]-benzenesulfonamide (6i):**

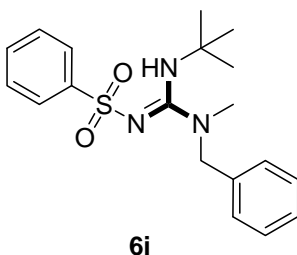

Following the general procedure, compound **6i** was prepared from *tert*-butyl isocyanide (57  $\mu$ L), *N,N*-dibromobenzenesulfonamide (158 mg) and *N*-methyl benzylamine (64  $\mu$ L) in presence of  $K_2CO_3$  (2 equiv., 138 mg). Purified by column chromatography on silica gel (Petroleum ether: EtOAc = 7:3). Semi solid (77%, 138.2 mg);  $^1H$  NMR ( $CDCl_3$ , 300 MHz):  $\delta$  7.92-7.89 (m, 2H), 7.43-7.41 (m, 3H), 7.33-7.31 (m, 3H), 7.24-7.21 (m, 2H), 4.99 (s, 1H), 4.58 (s, 2H), 3.06 (s, 3H), 1.05 (s, 9H);  $^{13}C$  NMR ( $CDCl_3$ , 75 MHz):  $\delta$  157.1, 144.7, 135.4, 130.8, 128.8, 128.2, 127.8, 127.3, 125.7, 56.0, 53.5, 39.3, 29.3; IR (KBr,  $cm^{-1}$ ):  $\nu$  3339, 2971, 2368, 1588, 1502, 1426, 1151, 1079, 755; HRMS  $m/z$  (ESI) calculated for  $C_{19}H_{26}N_3O_2S$  ( $M+H$ ) $^+$  360.1740 found 360.1743.

***N*-(*tert*-Butylamino-dipropylamino-methylene)-2-methylbenzenesulfonamide (6j):**

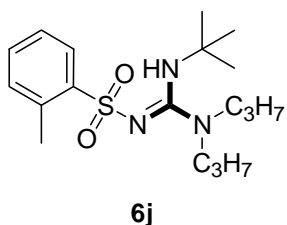

Following the general procedure, compound **6j** was prepared from *tert*-butyl isocyanide (57  $\mu$ L), *N,N*-dibromo-*o*-toluenesulfonamide (165 mg) and di-*n*-propylamine (68  $\mu$ L) in presence of  $K_2CO_3$  (2 equiv., 138 mg). Purified by column chromatography on silica gel (Petroleum ether: EtOAc = 4:1). White solid (82%, 144.7 mg); mp 123-125  $^{\circ}C$ ;  $^1H$  NMR ( $CDCl_3$ , 300 MHz):  $\delta$  7.93 (d,  $J$  = 7.5 Hz, 1H), 7.32-7.18 (m, 3H), 5.28 (s, 1H), 3.31 (t,  $J$  = 7.5

Hz, 4H), 2.71 (s, 3H), 1.60-1.50 (m, 4H), 1.17 (s, 9H), 0.84 (t,  $J = 7.2$  Hz, 6H);  $^{13}\text{C}$  NMR ( $\text{CDCl}_3$ , 75 MHz):  $\delta$  158.1, 142.6, 136.6, 131.7, 130.8, 126.7, 125.1, 54.0, 51.6, 29.8, 20.8, 20.3, 11.1; IR (KBr,  $\text{cm}^{-1}$ ):  $\nu$  3317, 2962, 2358, 1561, 1453, 1248, 1112, 1075, 862, 744; HRMS  $m/z$  (ESI) calculated for  $\text{C}_{18}\text{H}_{32}\text{N}_3\text{O}_2\text{S}$  ( $\text{M}+\text{H}$ ) $^+$  354.2209 found 354.2208.

***N*-(*tert*-Butylamino-piperidin-1-yl-methylene)-2-methylbenzenesulfonamide (6k):**

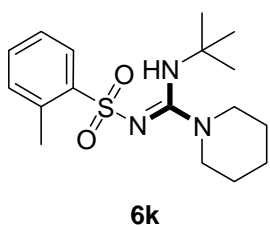

Following the general procedure, compound **6k** was prepared from *tert*-butyl isocyanide (57  $\mu\text{L}$ ), *N,N*-dibromo-*o*-toluenesulfonamide (158 mg) and piperidine (49  $\mu\text{L}$ ) in presence of  $\text{K}_2\text{CO}_3$  (2 equiv., 138 mg). Purified by column chromatography on silica gel (Petroleum ether: EtOAc = 7:3). White solid (78%, 131.4 mg); mp 119-121  $^\circ\text{C}$ ;  $^1\text{H}$  NMR ( $\text{CDCl}_3$ , 300 MHz):  $\delta$  7.94 (d,  $J = 8.1$  Hz, 1H), 7.31 (d,  $J = 6.3$  Hz, 1H), 7.25-7.20 (m, 2H), 5.17 (s, 1H), 3.42 (s, br, 4H), 2.73 (s, 3H), 1.61 (s, br, 6H), 1.14 (s, 9H);  $^{13}\text{C}$  NMR ( $\text{CDCl}_3$ , 75 MHz):  $\delta$  158.0, 142.5, 136.6, 131.8, 130.9, 126.8, 125.2, 53.9, 50.0, 29.8, 25.3, 24.2, 20.4; IR (KBr,  $\text{cm}^{-1}$ ):  $\nu$  3329, 2977, 2364, 1582, 1522, 1424, 1255, 1134, 1080, 867, 751; HRMS  $m/z$  (ESI) calculated for  $\text{C}_{17}\text{H}_{28}\text{N}_3\text{O}_2\text{S}$  ( $\text{M}+\text{H}$ ) $^+$  338.1896 found 338.1903.

**4-Bromo-*N*-(*tert*-butylamino-dioctylamino-methylene)-benzenesulfonamide (6l):**

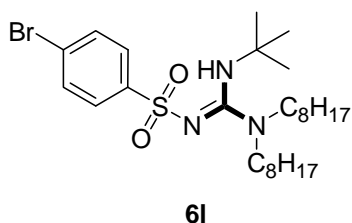

Following the general procedure, compound **6l** was prepared from *tert*-butyl isocyanide (57  $\mu\text{L}$ ), *N,N*-dibromo-4-bromobenzenesulfonamide (197 mg) and di-*n*-octylamine (151  $\mu\text{L}$ ) in presence of  $\text{K}_2\text{CO}_3$  (2 equiv., 138 mg). Purified by column chromatography on silica gel (Petroleum ether: EtOAc = 9:1). Pale yellow oil (77%, 214.8 mg);  $^1\text{H}$  NMR ( $\text{CDCl}_3$ , 300 MHz):  $\delta$  7.73 (d,  $J = 8.7$  Hz, 2H), 7.51 (d,  $J = 8.7$  Hz, 2H), 5.11 (s, 1H), 3.32 (t,  $J = 7.2$  Hz, 4H), 1.49 (s, br, 4H), 1.21-1.16 (m, 30H), 0.84 (t,  $J = 6.9$  Hz, 6H);  $^{13}\text{C}$  NMR ( $\text{CDCl}_3$ , 75 MHz):  $\delta$  157.1, 144.0, 131.3, 127.4, 125.1, 53.8, 49.9, 31.6, 29.7, 29.1, 29.0, 27.5, 26.6, 22.4, 13.9; IR (KBr,  $\text{cm}^{-1}$ ):  $\nu$  3330, 2968, 2362, 1576, 1451, 1257, 1117, 1061, 850, 745, 709; HRMS  $m/z$  (ESI) calculated for  $\text{C}_{27}\text{H}_{49}\text{BrN}_3\text{O}_2\text{S}$  ( $\text{M}+\text{H}$ ) $^+$  558.2723 found 558.2720.

***N*-(*tert*-Butylamino-dimethylamino-methylene)-4-nitrobenzenesulfonamide (**6m**):**

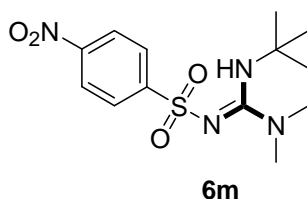

**6m**

Following the general procedure, compound **6m** was prepared from *tert*-butyl isocyanide (57  $\mu\text{L}$ ), *N,N*-dibromo-4-nitrobenzenesulfonamide (180 mg) and dimethylamine (34  $\mu\text{L}$ ) in presence of  $\text{K}_2\text{CO}_3$  (2 equiv., 138 mg). Purified by column chromatography on silica gel (Petroleum ether: EtOAc = 1:1). White solid (73%, 119.7 mg); mp 164-166  $^\circ\text{C}$ ;  $^1\text{H NMR}$  ( $\text{CDCl}_3$ , 300 MHz):  $\delta$  8.29 (d,  $J$  = 8.7 Hz, 2H), 8.08 (d,  $J$  = 8.7 Hz, 2H), 4.60 (s, 1H), 3.13 (s, 6H), 1.12 (s, 9H);  $^{13}\text{C NMR}$  ( $\text{CDCl}_3$ , 75 MHz):  $\delta$  156.2, 150.6, 148.7, 127.0, 123.7, 53.2, 40.4, 29.4; IR (KBr,  $\text{cm}^{-1}$ ):  $\nu$  3340, 2972, 2362, 1587, 1510, 1446, 1269, 1143, 1068, 852, 690; HRMS  $m/z$  (ESI) calculated for  $\text{C}_{13}\text{H}_{21}\text{N}_4\text{O}_4\text{S}$  ( $\text{M}+\text{H}$ ) $^+$  329.1278 found 329.1279.

**4-Bromo-*N*-(*tert*-butylamino-morpholin-4-yl-methylene)-benzenesulfonamide (**6n**):**

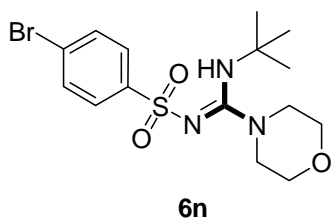

**6n**

Following the general procedure, compound **6n** was prepared from *tert*-butyl isocyanide (57  $\mu\text{L}$ ), *N,N*-dibromo-4-bromobenzenesulfonamide (197 mg) and morpholine (43  $\mu\text{L}$ ) in presence of  $\text{K}_2\text{CO}_3$  (2 equiv., 138 mg). Purified by column chromatography on silica gel (Petroleum ether: EtOAc = 7:3). Pale yellow solid (78%, 157.5 mg); mp 126-128  $^\circ\text{C}$ ;  $^1\text{H NMR}$  ( $\text{CDCl}_3$ , 300 MHz):  $\delta$  7.74 (d,  $J$  = 9 Hz, 2H), 7.56 (d,  $J$  = 8.7 Hz, 2H), 5.00 (s, 1H), 3.76 (t,  $J$  = 4.8 Hz, 4H), 3.48 (t,  $J$  = 4.8 Hz, 4H), 1.13 (s, 9H);  $^{13}\text{C NMR}$  ( $\text{CDCl}_3$ , 75 MHz):  $\delta$  156.7, 143.4, 131.5, 127.4, 125.5, 66.1, 53.7, 49.1, 29.4; IR (KBr,  $\text{cm}^{-1}$ ):  $\nu$  3373, 2981, 2369, 1581, 1444, 1265, 1142, 1069, 878, 751, 709; HRMS  $m/z$  (ESI) calculated for  $\text{C}_{15}\text{H}_{23}\text{BrN}_3\text{O}_3\text{S}$  ( $\text{M}+\text{H}$ ) $^+$  404.0638 found 404.0639.

***N*-(*tert*-Butylamino-(4-methyl-piperidin-1-yl)-methylene]-4-nitrobenzenesulfonamide (**6o**):**

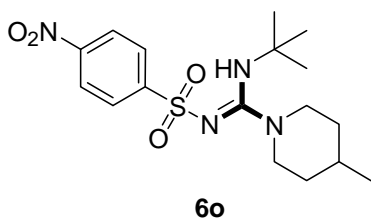

**6o**

Following the general procedure, compound **6o** was prepared from *tert*-butyl isocyanide (57  $\mu\text{L}$ ), *N,N*-dibromo-4-nitrobenzenesulfonamide (180 mg) and 4-methyl piperidine (59  $\mu\text{L}$ ) in presence of  $\text{K}_2\text{CO}_3$  (2 equiv., 138 mg). Purified by column chromatography on silica gel (Petroleum ether: EtOAc = 3:2). Yellow solid (76%, 145.1 mg); mp 141-143  $^\circ\text{C}$ ;  $^1\text{H NMR}$  ( $\text{CDCl}_3$ , 300 MHz):  $\delta$  8.27 (d,  $J$  = 8.7 Hz, 2H), 8.06 (d,  $J$  = 8.7

Hz, 2H), 4.76 (s, 1H), 3.96 (d,  $J = 12.9$  Hz, 2H), 3.01 (t,  $J = 12.9$  Hz, 2H), 1.79-1.60 (m, 3H), 1.38-1.23 (m, 2H), 1.11 (s, 9H), 0.96 (d,  $J = 6.6$  Hz, 3H);  $^{13}\text{C}$  NMR ( $\text{CDCl}_3$ , 75 MHz):  $\delta$  156.2, 150.4, 148.7, 127.0, 123.7, 53.4, 49.3, 33.5, 30.8, 29.4, 21.4; IR (KBr,  $\text{cm}^{-1}$ ):  $\nu$  3353, 2969, 2358, 1582, 1507, 1438, 1255, 1150, 1072, 873, 747, 702; HRMS  $m/z$  (ESI) calculated for  $\text{C}_{17}\text{H}_{27}\text{N}_4\text{O}_4\text{S}$  ( $\text{M}+\text{H}$ ) $^+$  383.1747 found 383.1748.

## 6. Procedure for gram scale synthesis:

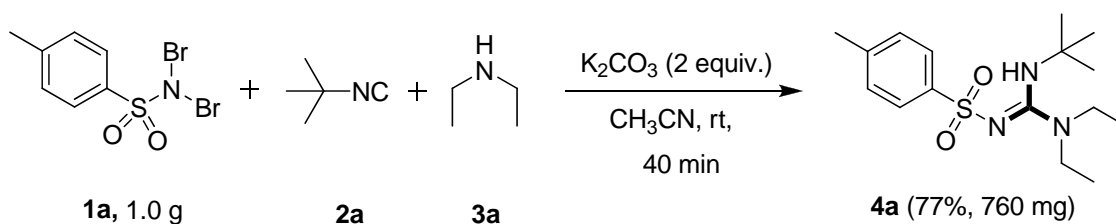

To an ice cooled solution of *t*-butyl isocyanide (3.04 mmol, 1 equiv),  $\text{K}_2\text{CO}_3$  (6.08 mmol, 2 equiv) and diethylamine (3.04 mmol, 1 equiv) in  $\text{CH}_3\text{CN}$  (20 mL),  $\text{TsNBr}_2$  (3.04 mmol, 1g, 1 equiv) was added in portion. The resultant mixture was then allowed to stir at room temperature. After completion of the reaction as monitored by TLC, the reaction mixture was passed through a short pad of celite and washed with ethyl acetate. The solvent was concentrated under reduced pressure and the crude was purified by flash column chromatography using petroleum ether-ethyl acetate (7:3) as eluent to afford *N*-(*tert*-Butylamino-diethylamino-methylene)-4-methylbenzenesulfonamide (**4a**) with 77% yield (760 mg).

## 7. General procedure for synthesis of sulfonyl carbodiimides and characterization:

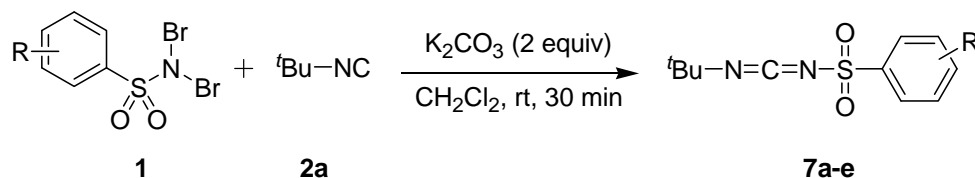

To a stirred solution of *t*-Butyl isocyanide (0.5 mmol, 1.0 equiv) in  $\text{CH}_2\text{Cl}_2$  (4 mL) at room temperature, dibromoarylsulfonamide (0.5 mmol, 1.0 equiv) and  $\text{K}_2\text{CO}_3$  (1 mmol, 2.0 equiv) was added. After completion of the reaction, the reaction mixture was passed through a celite pad and

washed with CH<sub>2</sub>Cl<sub>2</sub>. The filtrate was concentrated under reduced pressure. Purification by flash column chromatography using petroleum ether-ethyl acetate (9:1) afforded the product.

***N*-(*tert*-Butyliminomethylene)-4-methylbenzenesulfonamide (7a):**

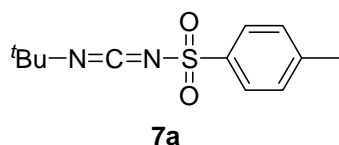

Following the general procedure, compound **7a** was prepared from *tert*-butyl isocyanide (57  $\mu$ L) and *N,N*-dibromo-*p*-toluenesulfonamide (165 mg) in presence of K<sub>2</sub>CO<sub>3</sub> (138 mg).

Purified by column chromatography on silica gel (Petroleum ether: EtOAc = 9:1). Semi solid (55%, 69.3 mg); <sup>1</sup>H NMR (CDCl<sub>3</sub>, 300 MHz):  $\delta$  7.82 (d, *J* = 7.8 Hz, 2H), 7.32 (d, *J* = 7.8 Hz, 2H), 2.43 (s, 3H), 1.37 (s, 9H); <sup>13</sup>C NMR (CDCl<sub>3</sub>, 75 MHz):  $\delta$  144.0, 138.0, 129.5, 126.5, 122.1, 59.6, 30.8, 21.4; IR (KBr, cm<sup>-1</sup>):  $\nu$  2978, 2929, 2162, 1597, 1381, 1340, 1165, 1089, 842, 752; HRMS *m/z* (ESI) calculated for C<sub>12</sub>H<sub>17</sub>N<sub>2</sub>O<sub>2</sub>S (M+H)<sup>+</sup> 253.1005 found 253.1007.

***N*-(*tert*-Butyliminomethylene)benzenesulfonamide (7b):**

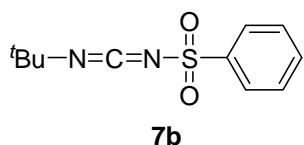

Following the general procedure, compound **7b** was prepared from *tert*-butyl isocyanide (57  $\mu$ L) and *N,N*-dibromobenzenesulfonamide (158 mg) in presence of K<sub>2</sub>CO<sub>3</sub> (138 mg). Purified by column

chromatography on silica gel (Petroleum ether: EtOAc = 9:1). Colorless oil (68%, 80.9 mg); <sup>1</sup>H NMR (CDCl<sub>3</sub>, 300 MHz):  $\delta$  7.94 (d, *J* = 7.8 Hz, 2H), 7.62-7.51 (m, 3H), 1.37 (s, 9H); <sup>13</sup>C NMR (CDCl<sub>3</sub>, 75 MHz):  $\delta$  140.9, 133.2, 129.0, 126.5, 121.4, 59.8, 30.8; IR (KBr, cm<sup>-1</sup>):  $\nu$  2983, 2167, 1592, 1394, 1157, 1081, 849, 741; HRMS *m/z* (ESI) calculated for C<sub>11</sub>H<sub>15</sub>N<sub>2</sub>O<sub>2</sub>S (M+H)<sup>+</sup> 239.0848 found 239.0853.

***N*-(*tert*-Butyliminomethylene)-4-nitrobenzenesulfonamide (7c):**

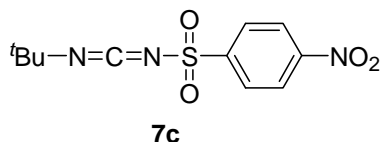

Following the general procedure, compound **7c** was prepared from *tert*-butyl isocyanide (57  $\mu$ L) and *N,N*-dibromo-4-nitrobenzenesulfonamide (180 mg) in presence of K<sub>2</sub>CO<sub>3</sub> (138

mg). Purified by column chromatography on silica gel (Petroleum ether: EtOAc = 9:1). White solid (59%, 83.4 mg); mp 76-78 °C; <sup>1</sup>H NMR (CDCl<sub>3</sub>, 300 MHz):  $\delta$  8.39 (d, *J* = 8.7 Hz, 2H), 8.12 (d, *J* = 8.7 Hz, 2H), 1.47 (s, 9H); <sup>13</sup>C NMR (CDCl<sub>3</sub>, 75 MHz):  $\delta$  150.0, 146.5, 127.8,



124.2, 117.7, 60.2, 30.8; **IR (KBr, cm<sup>-1</sup>):**  $\nu$  2995, 2916, 2158, 1588, 1376, 1323, 1184, 1096, 861, 755; **HRMS m/z (ESI)** calculated for C<sub>11</sub>H<sub>14</sub>N<sub>3</sub>O<sub>4</sub>S (M+H)<sup>+</sup> 284.0699 found 284.0706.

***N*-(*tert*-Butyliminomethylene)-2-naphthalenesulfonamide (7d):**

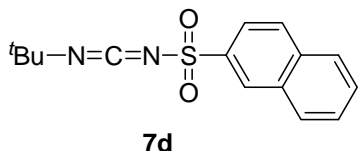

Following the general procedure, compound **7d** was prepared from *tert*-butyl isocyanide (57  $\mu$ L) and *N,N*-dibromo-2-naphthalenesulfonamide (183 mg) in presence of K<sub>2</sub>CO<sub>3</sub> (138 mg). Purified by column chromatography on silica gel (Petroleum ether: EtOAc = 9:1). Colorless oil (63%, 90.7 mg); **<sup>1</sup>H NMR (CDCl<sub>3</sub>, 300 MHz):**  $\delta$  8.51 (s, 1H), 8.00-7.90 (m, 4H), 7.66-7.61 (m, 2H), 1.37 (s, 9H); **<sup>13</sup>C NMR (CDCl<sub>3</sub>, 75 MHz):**  $\delta$  137.8, 134.9, 131.8, 129.4, 129.2, 128.9, 127.8, 127.7, 127.6, 121.8, 59.8, 30.8; **IR (KBr, cm<sup>-1</sup>):**  $\nu$  2932, 2162, 1593, 1329, 1181, 1077, 848, 752; **HRMS m/z (ESI)** calculated for C<sub>15</sub>H<sub>17</sub>N<sub>2</sub>O<sub>2</sub>S (M+H)<sup>+</sup> 289.1005 found 289.1009.

***N*-(*tert*-Butyliminomethylene)-2-methylbenzenesulfonamide (7e):**

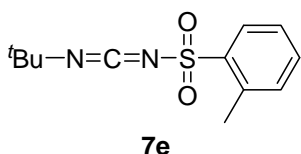

Following the general procedure, compound **7e** was prepared from *tert*-butyl isocyanide (57  $\mu$ L) and *N,N*-dibromo-*o*-toluenesulfonamide (165 mg) in presence of K<sub>2</sub>CO<sub>3</sub> (138 mg). Purified by column chromatography on silica gel (Petroleum ether: EtOAc = 9:1). Colorless oil (48%, 60.4 mg); **<sup>1</sup>H NMR (CDCl<sub>3</sub>, 300 MHz):**  $\delta$  8.03 (d, *J* = 7.2 Hz, 1H), 7.48 (t, *J* = 7.2 Hz, 1H), 7.35-7.30 (m, 2H), 2.70 (s, 3H), 1.38 (s, 9H); **<sup>13</sup>C NMR (CDCl<sub>3</sub>, 75 MHz):**  $\delta$  139.2, 137.6, 133.1, 132.4, 128.2, 126.0, 59.7, 30.9, 20.3; **IR (KBr, cm<sup>-1</sup>):**  $\nu$  2981, 2947, 2165, 1595, 1377, 1332, 1159, 1086, 844, 750; **HRMS m/z (ESI)** calculated for C<sub>12</sub>H<sub>17</sub>N<sub>2</sub>O<sub>2</sub>S (M+H)<sup>+</sup> 253.1005 found 253.1012.

**8. Synthesis of 4a from the carbodiimide (7a):**

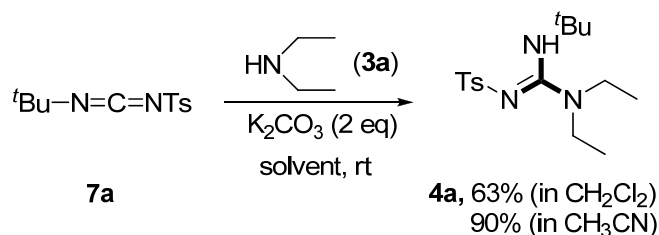

In the next step the carbodiimide *N*-(*tert*-Butyliminomethylene)-4-methylbenzenesulfonamide (**7a**) (0.5 mmol, 1.0 equiv) was added with diethylamine (0.5 mmol, 1equiv) in presence of K<sub>2</sub>CO<sub>3</sub> in CH<sub>3</sub>CN and allowed to stir for appropriate time at room temperature. The desired sulfonyl guanidine product **4a** was isolated in 90% yield.

9. Procedure for synthesis of 1-benzyl-4-methylidene-3-[(4-methylphenyl)sulfonyl]imidazolidin-2-one (**8**):

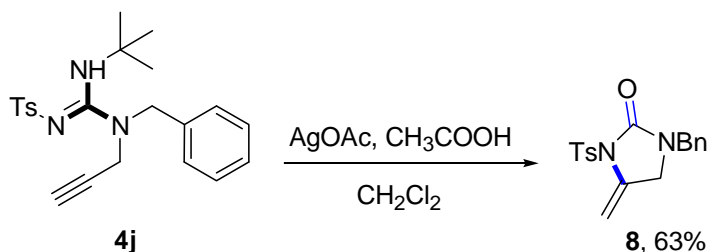

To a solution of *N*-[(Benzyl-prop-2-ynyl-amino)-*tert*-butylamino-methylene]-4-methylbenzenesulfonamide (**4j**, 0.20 mmol, 1.0 equiv) in CH<sub>2</sub>Cl<sub>2</sub> (3 mL), silver acetate (0.02 mmol, 0.1 equiv) and acetic acid (0.60 mmol, 3 equiv) was added and stirred at room temperature. After 2h (completion of the reaction as monitored by TLC), a saturated solution of NaHCO<sub>3</sub> was added to the reaction mixture. The aqueous layer was extracted with CH<sub>2</sub>Cl<sub>2</sub>, washed with water and dried over anhydrous Na<sub>2</sub>SO<sub>4</sub>. The residue was concentrated under reduced pressure and purified by flash chromatography using petroleum ether-ethyl acetate (4:1) as eluent to afford 1-benzyl-4-methylidene-3-[(4-methylphenyl)sulfonyl]imidazolidin-2-one (**8**). Colorless oil (63%, 43.0 mg); <sup>1</sup>H NMR (CDCl<sub>3</sub>, 300 MHz):<sup>7</sup> δ 7.96 (d, *J* = 7.5 Hz, 2H), 7.36-7.29 (m, 5H), 7.14 (d, *J* = 3 Hz, 2H), 5.51 (s, br, 1H), 4.43 (s, br, 1H), 4.36 (s, 2H), 3.81 (s, 2H), 2.45 (s, 3H); <sup>13</sup>C NMR (CDCl<sub>3</sub>, 75 MHz): δ 152.8, 145.0, 135.3, 134.7, 134.2, 129.5, 128.7, 128.0, 127.9, 127.8, 91.8, 47.1, 47.0, 21.6; IR (KBr, cm<sup>-1</sup>): ν 3412, 2924, 1741, 1658, 1436, 1377, 1273, 1176, 1087, 875, 754; HRMS *m/z* (ESI) calculated for C<sub>18</sub>H<sub>19</sub>N<sub>2</sub>O<sub>3</sub>S (M+H)<sup>+</sup> 343.1110 found 343.1118.

10. Procedure for synthesis of *N*- Allyl-*N*-(*N*-allyl-*N*-benzyl-*N'*-*tert*-butylcarbamimidoyl)-4-methylbenzenesulfonamide (**9**):

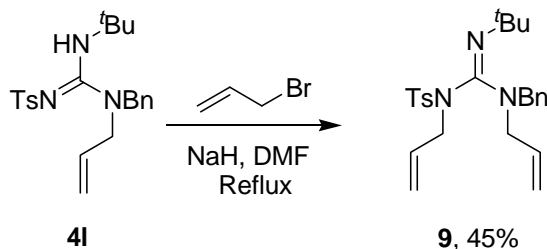

To a solution of *N*-[(Allyl-benzyl-amino)-*tert*-butylamino-methylene]-4-methylbenzenesulfonamide (**41**, 0.50 mmol, 1.0 equiv) in dry DMF (2 mL), NaH (1.0 mmol, 2.0 equiv) and allyl bromide (1.0 mmol, 2.0 equiv.) was added and refluxed under nitrogen atmosphere. After completion of the reaction (monitored by TLC), water was added and the aqueous layer was extracted using diethyl ether. The organic layer was dried over anhydrous Na<sub>2</sub>SO<sub>4</sub> and concentrated under reduce pressure. The crude mixture was purified by flash chromatography using petroleum ether-ethyl acetate (9:1) as eluent to afford *N*- Allyl-*N*-(*N*-allyl-*N*-benzyl-*N'*-*tert*-butylcarbamimidoyl)-4-methylbenzenesulfonamide (**9**). Colorless oil (45%, 98.7 mg); <sup>1</sup>H NMR (CDCl<sub>3</sub>, 300 MHz): δ 7.86 (d, *J* = 8.1 Hz, 2H), 7.33-7.29 (m, 5H), 7.26-7.23 (m, 2H), 5.94-5.77 (m, 2H), 5.22-5.04 (m, 4H), 4.75 (d, *J* = 14.4 Hz, 1H), 4.43 (d, *J* = 14.1 Hz, 1H), 3.81 (s, br, 4H), 2.39 (s, 3H), 1.18 (s, 9H); <sup>13</sup>C NMR (CDCl<sub>3</sub>, 75 MHz): δ 160.2, 141.9, 141.3, 136.2, 135.8, 133.0, 128.9, 128.5, 127.7, 126.2, 119.5, 116.9, 57.8, 53.6, 53.1, 51.5, 28.9, 21.4; IR (KBr, cm<sup>-1</sup>): ν 3336, 2917, 2369, 1660, 1501, 1371, 1283, 1089, 834, 749.

11. Procedure for synthesis of {1-Benzyl-3-tosyl-1,3,4,7-tetrahydro-[1,3]diazepin-2-ylidene}-*tert*-butylamine (**10**):

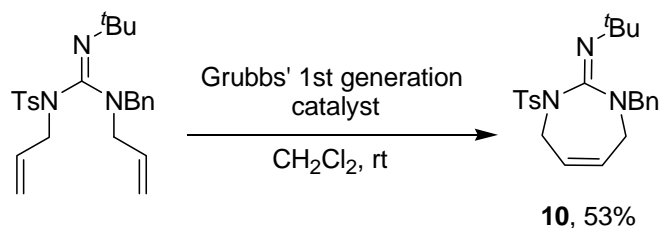

To a stirred solution of *N*-Allyl-*N*-(*N*-allyl-*N*-benzyl-*N'*-*tert*-butylcarbamimidoyl)-4-methylbenzenesulfonamide (**9**, 0.20 mmol, 1.0 equiv) in dry CH<sub>2</sub>Cl<sub>2</sub> (2 mL), Grubbs' 1st generation catalyst (5 mol%) was added under nitrogen atmosphere. The resulting purple solution becomes brown after 10-15 min. The reaction was allowed to stir at room temperature

overnight under nitrogen atmosphere. After completion the reaction, the crude mixture was concentrated under reduced pressure and the residue was purified by flash chromatography using petroleum ether-ethyl acetate (4:1) as eluent to afford {1-Benzyl-3-tosyl-1,3,4,7-tetrahydro-[1,3]diazepin-2-ylidene}-*tert*-butylamine (**10**). White semi solid (53%, 43.5 mg);  $^1\text{H NMR}$  ( $\text{CDCl}_3$ , 300 MHz):  $\delta$  7.84 (d,  $J = 7.8$  Hz, 2H), 7.29 (s, br, 5H), 7.23 (d,  $J = 8.1$  Hz, 2H), 5.56 (d,  $J = 10.2$  Hz, 1H), 5.32 (d,  $J = 10.2$  Hz, 1H), 4.81 (br, 1H), 4.53 (br, 1H), 3.89 (br, 2H), 3.56 (br, 2H), 2.39 (s, 3H), 1.18 (s, 9H);  $^{13}\text{C NMR}$  ( $\text{CDCl}_3$ , 75 MHz):  $\delta$  161.9, 141.9, 141.3, 136.9, 128.9, 128.8, 128.4, 127.6, 126.4, 126.1, 125.4, 57.0, 56.8, 49.5, 45.5, 28.6, 21.4; IR (KBr,  $\text{cm}^{-1}$ ):  $\nu$  3412, 2924, 1741, 1658, 1436, 1377, 1273, 1176, 1087, 875, 754; HRMS  $m/z$  (ESI) calculated for  $\text{C}_{23}\text{H}_{30}\text{N}_3\text{O}_2\text{S}$  ( $\text{M}+\text{H}$ ) $^+$  412.2053 found 412.2058.

## 12. Procedure for synthesis of 1-Benzyl-3-tosyl-1,3,4,7-tetrahydro-[1,3]diazepin-2-one (**11**):

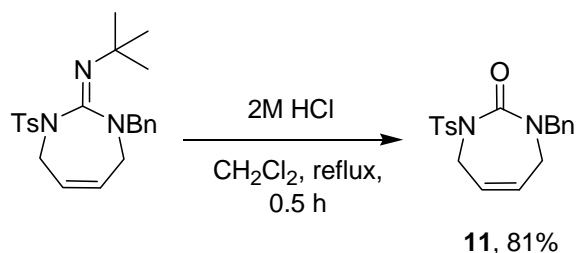

2M HCl solution (0.2 mL) was added to a stirred solution of {1-Benzyl-3-tosyl-1,3,4,7-tetrahydro-[1,3]diazepin-2-ylidene}-*tert*-butylamine (**10**, 0.1 mmol, 1.0 equiv.) in  $\text{CH}_2\text{Cl}_2$  (0.5 mL) and the mixture was refluxed for 30 min. Then  $\text{CH}_2\text{Cl}_2$  was evaporated and added  $\text{NaHCO}_3$  solution. The mixture was extracted with EtOAc, dried over anhydrous  $\text{Na}_2\text{SO}_4$  and concentrated under reduced pressure to afford the product 1-Benzyl-3-tosyl-1,3,4,7-tetrahydro-[1,3]diazepin-2-one (**11**) without any further chromatographic purification. Colorless semi solid (81%, 28.8 mg);  $^1\text{H NMR}$  ( $\text{CDCl}_3$ , 300 MHz):  $\delta$  7.73 (d,  $J = 8.1$  Hz, 2H), 7.25-7.16 (m, 7H), 5.68-5.65 (m, 2H), 4.57 (s, 2H), 3.81-3.75 (m, 4H), 2.40 (s, 3H);  $^{13}\text{C NMR}$  ( $\text{CDCl}_3$ , 75 MHz):  $\delta$  157.3, 143.4, 136.7, 129.2, 128.5, 127.8, 126.7, 126.0, 125.3, 54.6, 48.4, 44.2, 21.4; IR (KBr,  $\text{cm}^{-1}$ ):  $\nu$  3081, 2933, 1681, 1459, 1256, 1080, 861, 742.

### 13. References:

1. a) M. Tajbakhsh, A. Khazaei, M. S. Mahalli and R. G. Vaghi, *Phosphorus, Sulfur Silicon Relat. Elem.*, 2004, **179**, 1159; b) A. Khazaei, A. Rostami, Z. Tanbakouchian and Z. Zinati, *Catal. Commun.*, 2006, **7**, 214; c) A. J. Borah and P. Phukan, *Chem. Commun.*, 2012, **48**, 5491.
2. B. K. Das, S. Pradhan and T. Punniyamurthy, *Org. Lett.*, 2018, **20**, 4444.
3. T. Makino and K. Itoh, *J. Org. Chem.*, 2004, **69**, 395.
4. B. Kim, J. M. Beebe, Y. Jun, X. -Y. Zhu, C. D. Frisbie, *J. Am. Chem. Soc.*, 2006, 128, 4970.
5. Z. Zhang, B. Huang, G. Qiao, L. Zhu, F. Xiao, F. Chen, B. Fu and Z. Zhang, *Angew. Chem. Int. Ed.*, 2017, **56**, 4320.
6. Z. -Y. Gu, Y. Liu, F. Wang, X. Bao, S. -Y. Wang and S. -J. Ji, *ACS Catal.*, 2017, **7**, 3893.
7. M. Nagamoto, T. Nishimura and H. Yorimitsu, *Synthesis*, 2017, **49**, 4272.
8. E. Kanno, K. Yamanoi, S. Koya, I. Azumaya, H. Masu, R. Yamasaki and S. Saito, *J. Org. Chem.*, 2012, **77**, 2142.

14. Crystal structure data of *N*-(*tert*-Butylamino-dimethylamino-methylene)-4-nitrobenzenesulfonamide (**6m**)

CCDC No. 1882434

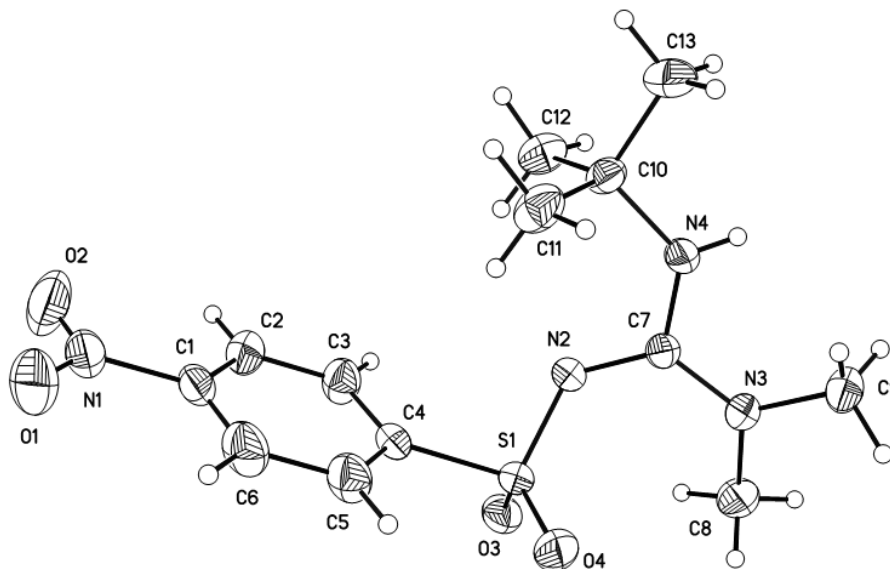

**Figure:** ORTEP of compound *N*-(*tert*-Butylamino-dimethylamino-methylene)-4-nitrobenzenesulfonamide (**6m**) with 35% probability ellipsoid

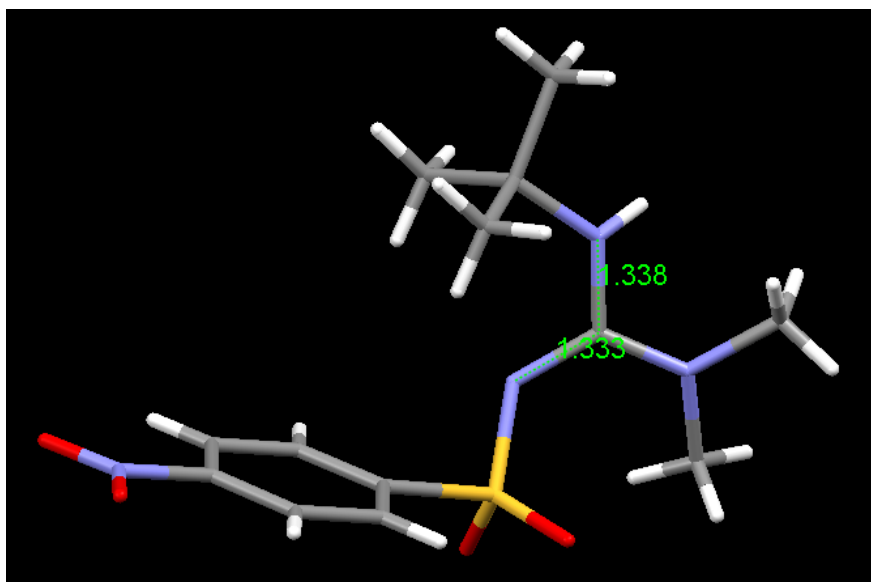

**Figure:** Bond length of C=NNs (1.333 Å) and C-NH(*t*Bu) (1.338 Å) (Measured by using Mercury free version 1.4.1).

**Table: Crystal structure data of *N*-(*tert*-Butylamino-dimethylamino-methylene)-4-nitrobenzenesulfonamide (6m)**

|                                                            |                                                                 |
|------------------------------------------------------------|-----------------------------------------------------------------|
| Chemical formula                                           | C <sub>13</sub> H <sub>20</sub> N <sub>4</sub> O <sub>4</sub> S |
| <i>M</i> <sub>r</sub>                                      | 328.39                                                          |
| Crystal system                                             | Monoclinic                                                      |
| Space group                                                | <i>P</i> 2 <sub>1</sub> / <i>c</i>                              |
| Temperature (K)                                            | 296                                                             |
| <i>a</i> , Å                                               | 5.8970 (4)                                                      |
| <i>b</i> , Å                                               | 12.6136 (9)                                                     |
| <i>c</i> , Å                                               | 21.8512 (16)                                                    |
| <i>α</i> , deg                                             | 90                                                              |
| <i>β</i> , deg                                             | 90.674 (4)                                                      |
| <i>γ</i> , deg                                             | 90                                                              |
| <i>V</i> (Å <sup>3</sup> )                                 | 1625.2 (2)                                                      |
| <i>Z</i>                                                   | 4                                                               |
| <i>μ</i> (mm <sup>-1</sup> )                               | 0.22                                                            |
| No. of measured                                            | 14152                                                           |
| Observed [ <i>I</i> > 2σ( <i>I</i> )] reflections          | 2733                                                            |
| <i>R</i> <sub>1</sub>                                      | 0.045                                                           |
| <i>wR</i> <sub>2(all)</sub>                                | 0.145                                                           |
| GOF                                                        | 1.12                                                            |
| Δρ <sub>max</sub> , Δρ <sub>min</sub> (e Å <sup>-3</sup> ) | 0.37, -0.28                                                     |
| Diffractometer                                             | Bruker <i>APEX-II</i> CCD diffractometer                        |
| CCDC No.                                                   | 1882434                                                         |

15.  $^1\text{H}$  and  $^{13}\text{C}$  NMR spectra of compounds:

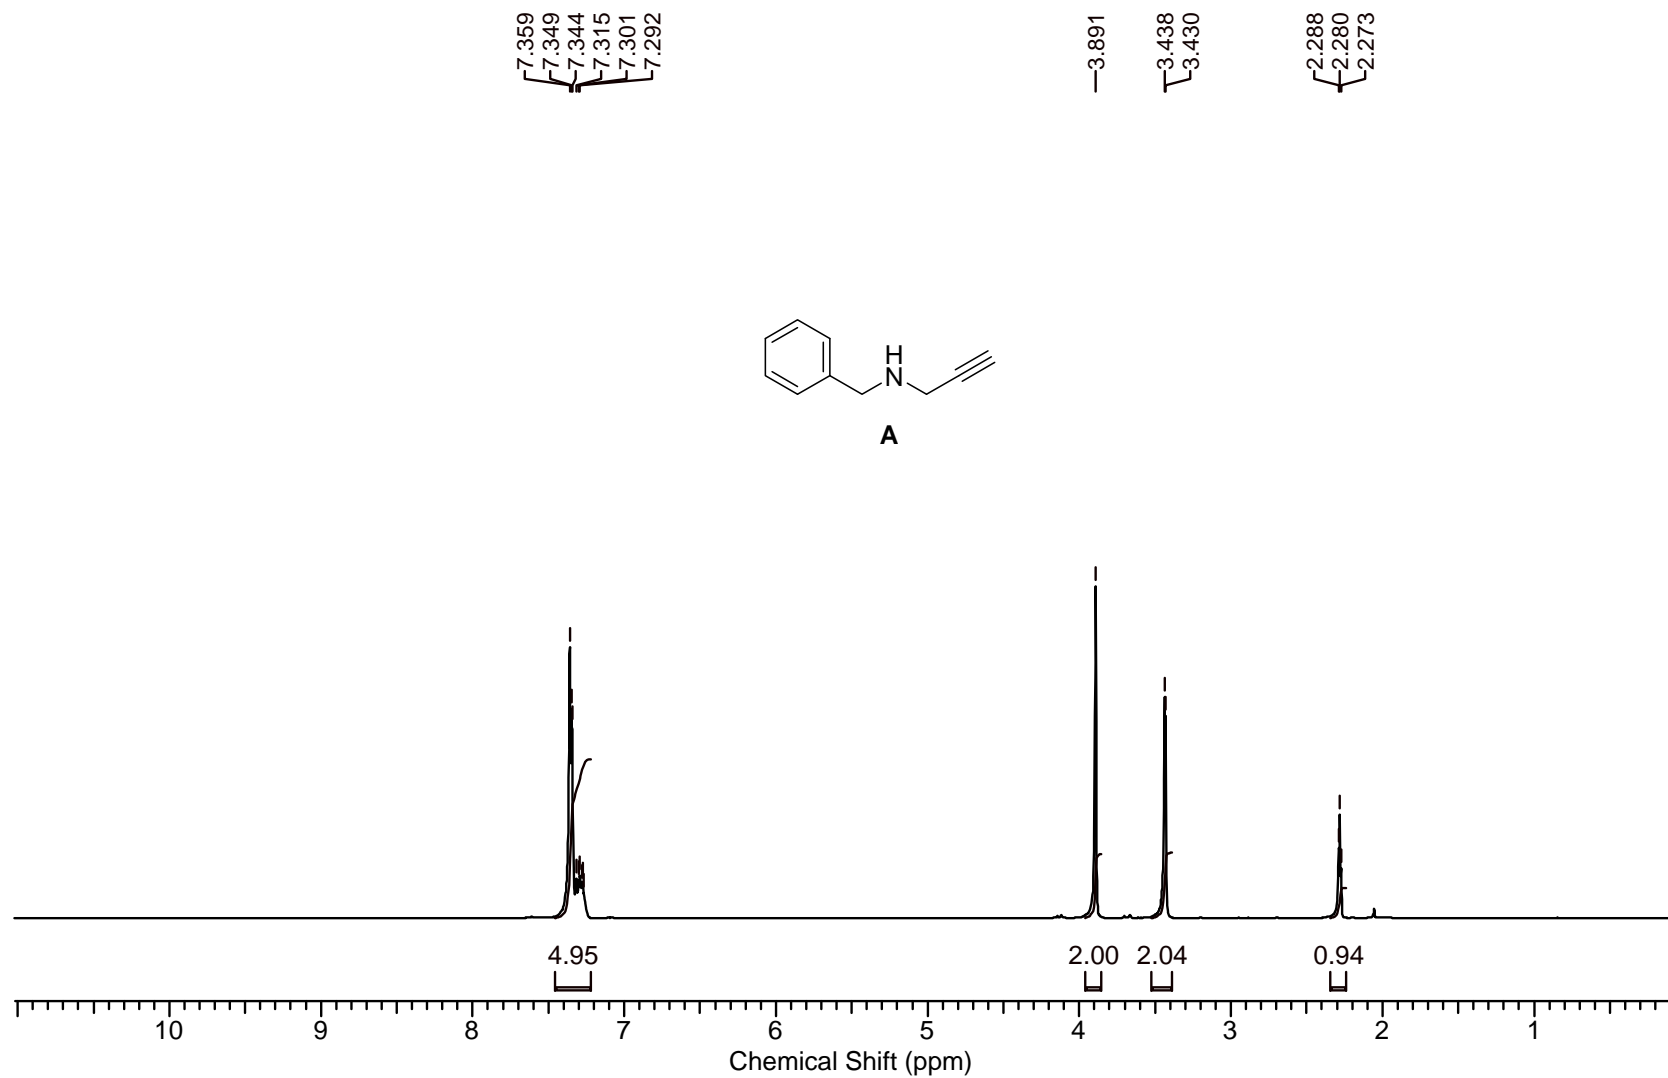



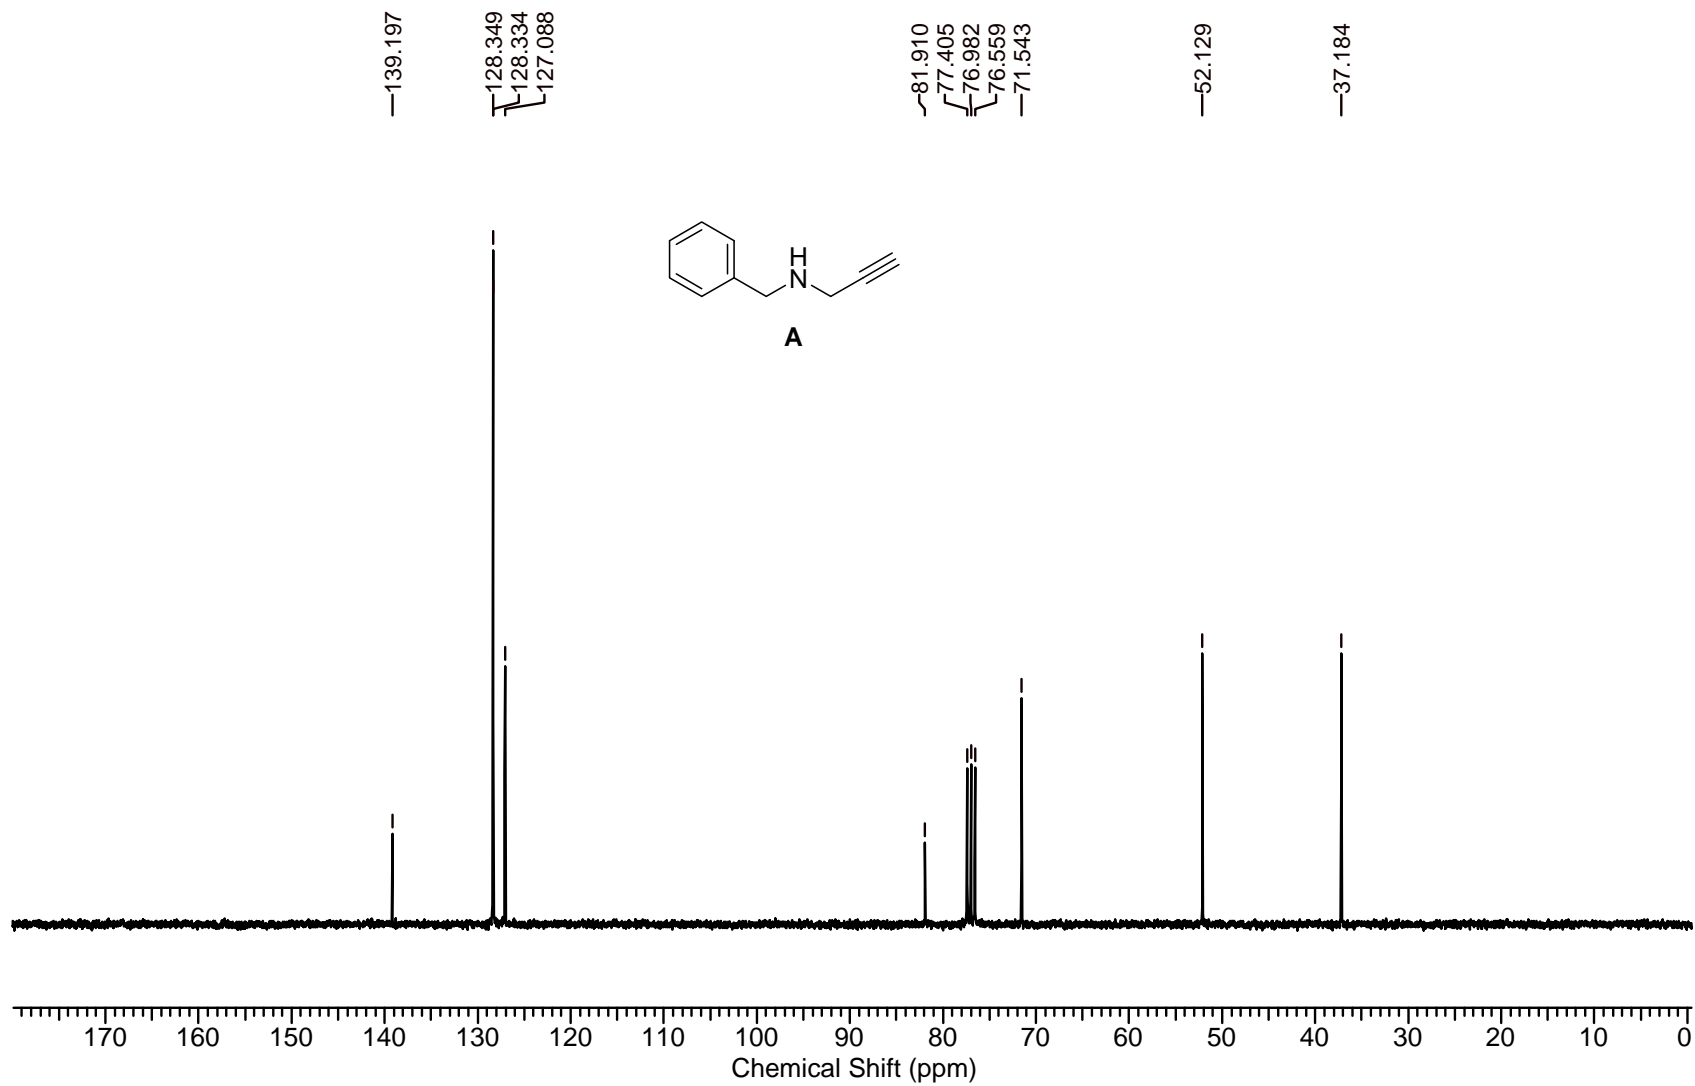

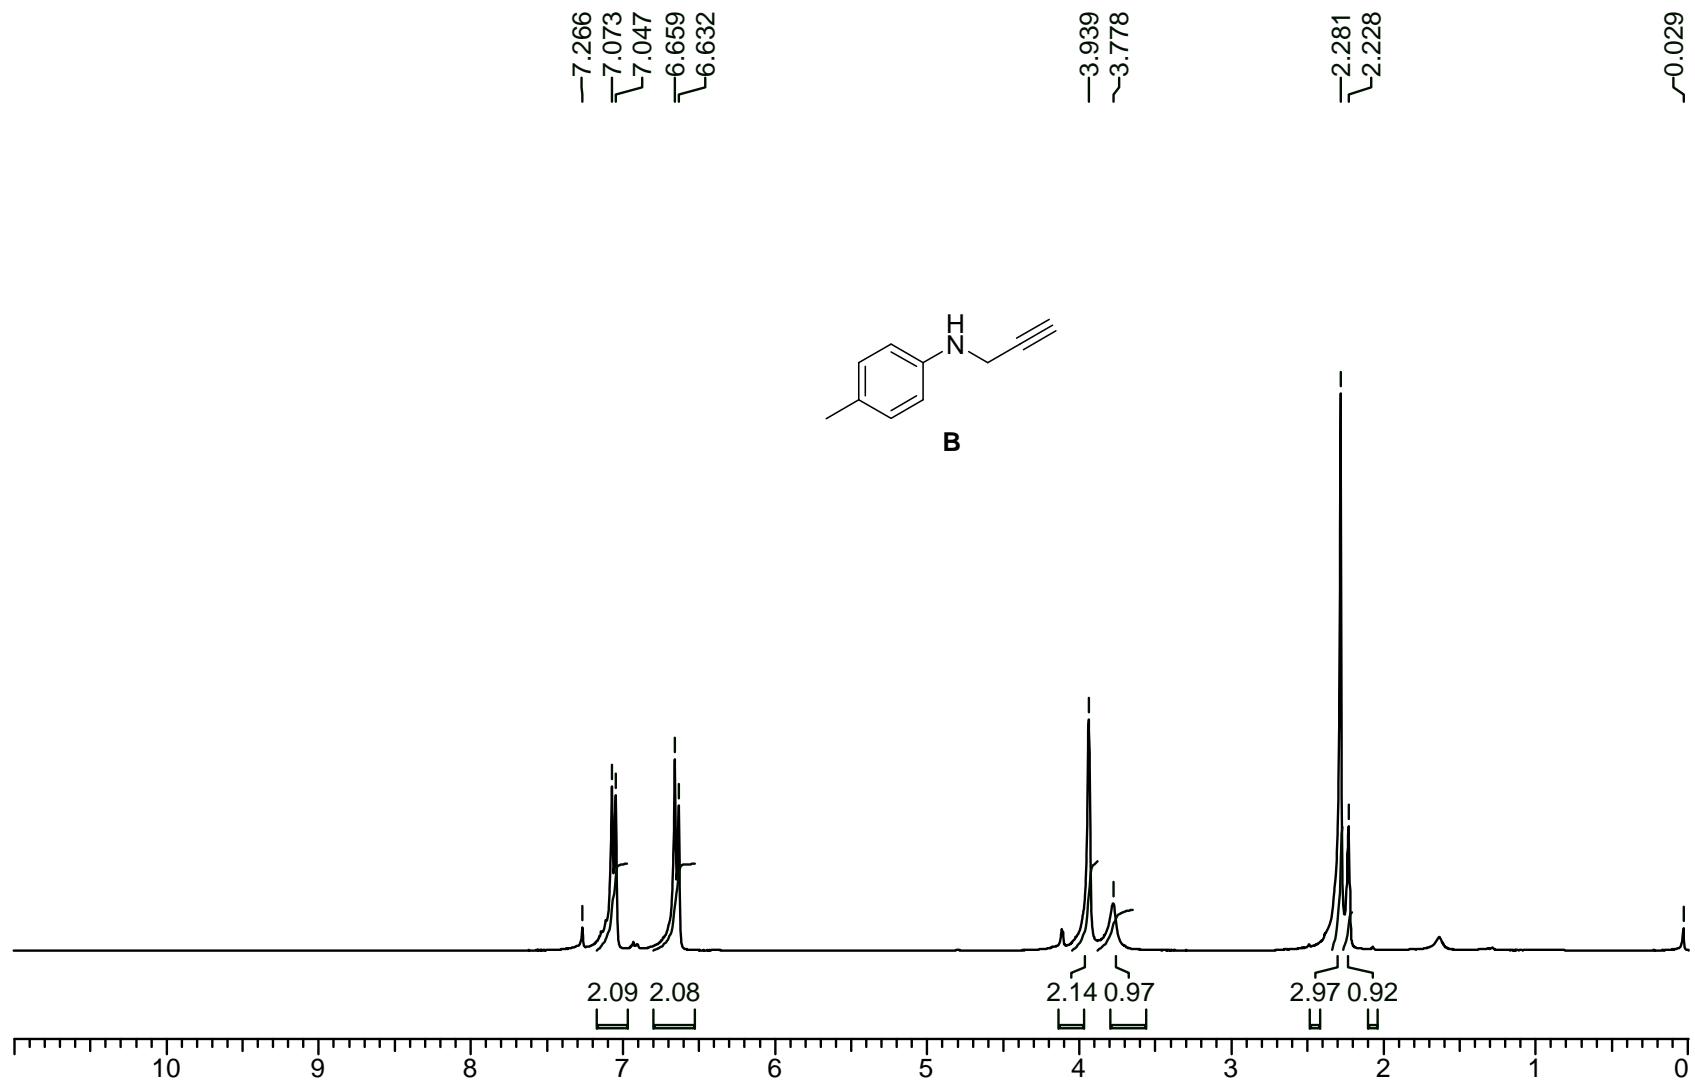

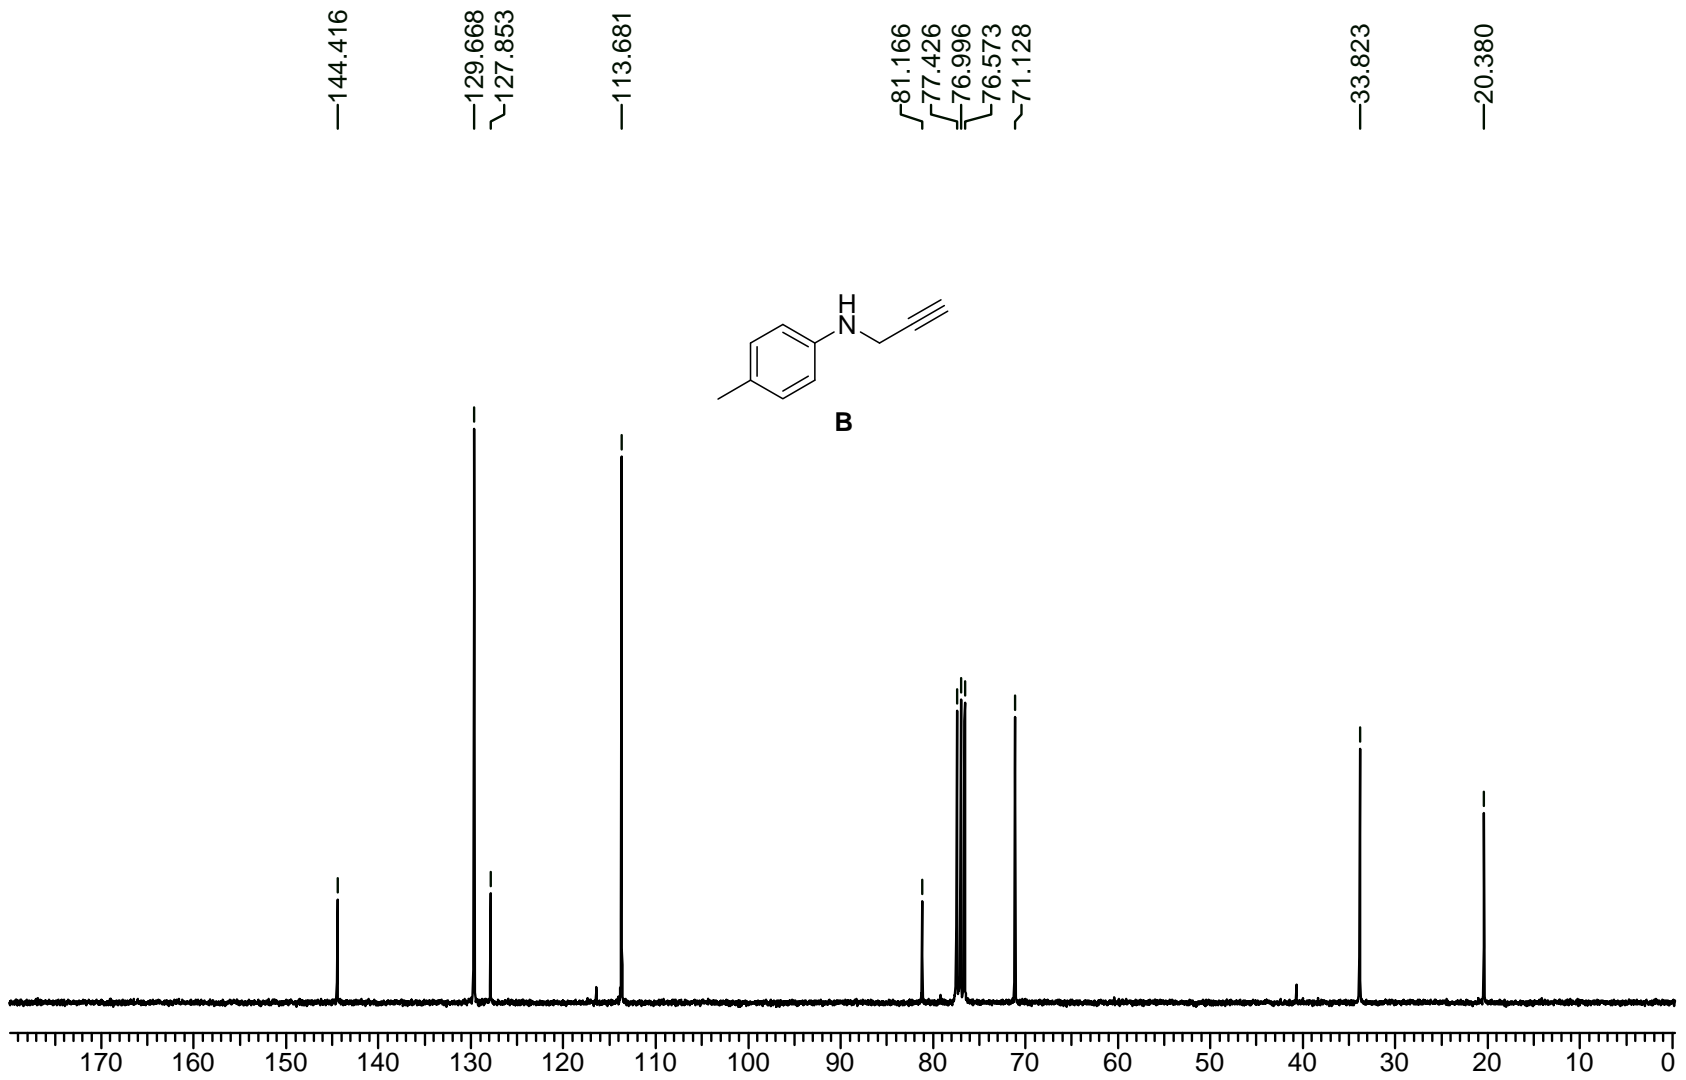

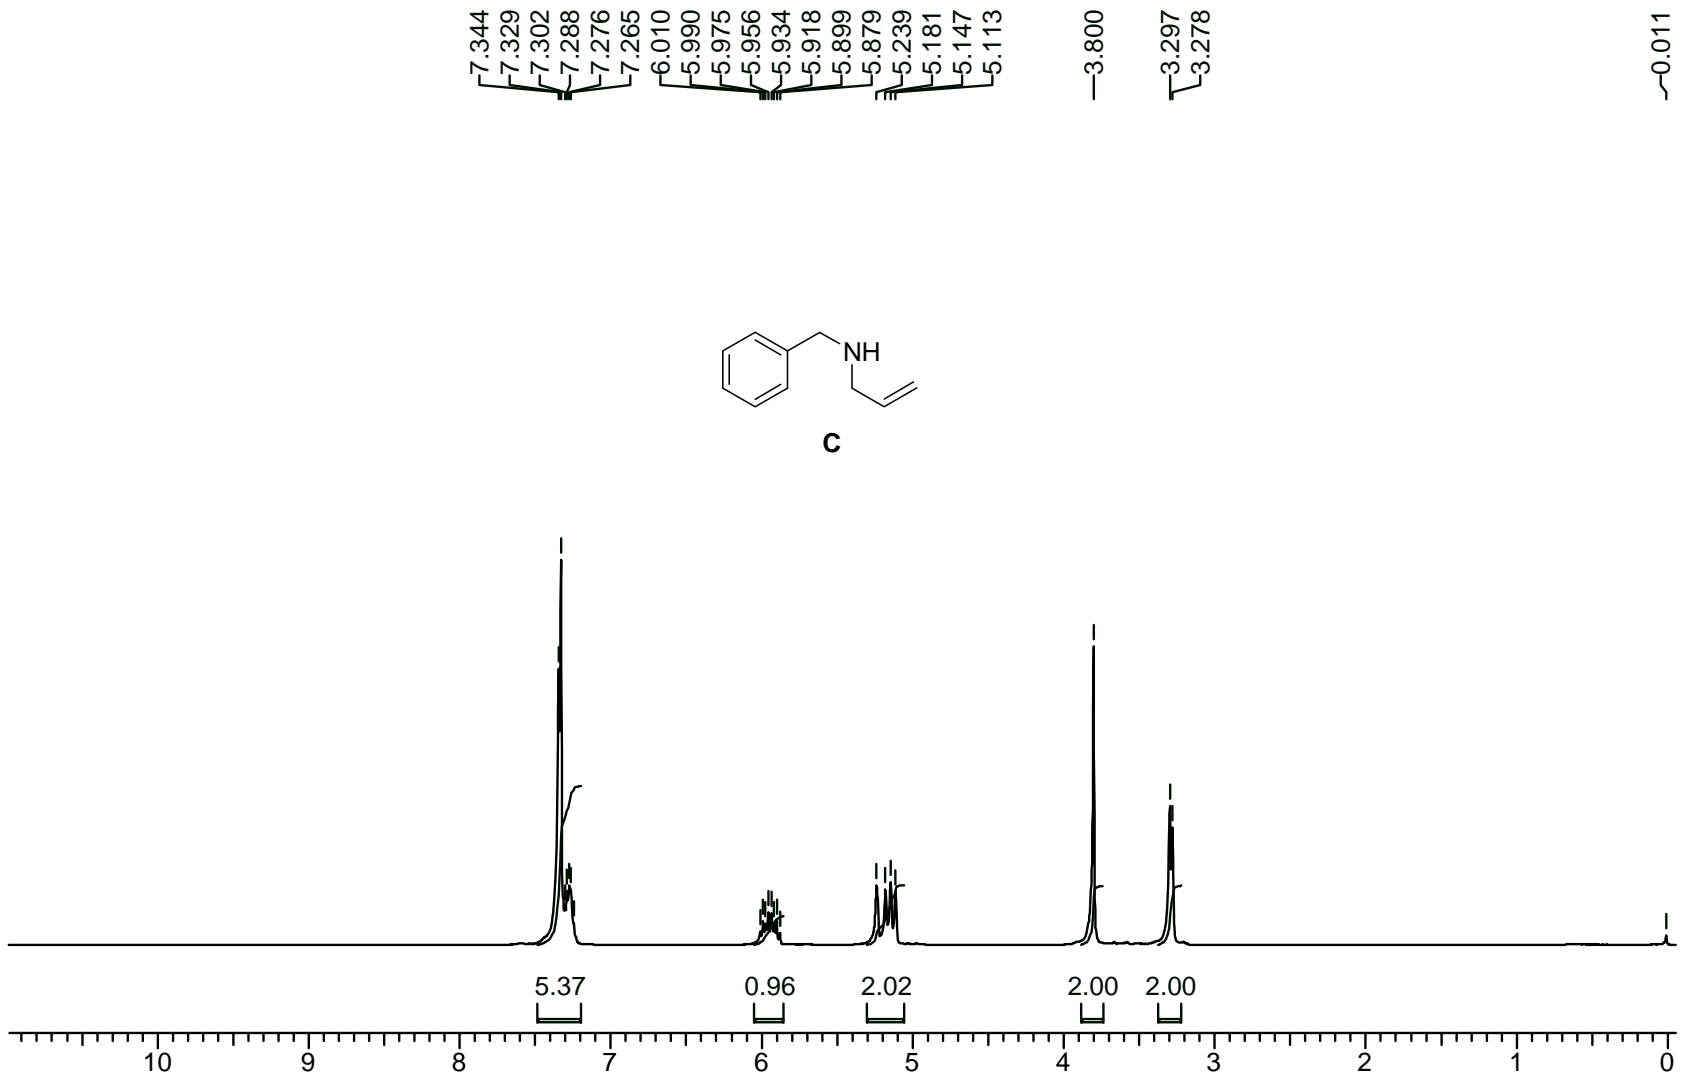

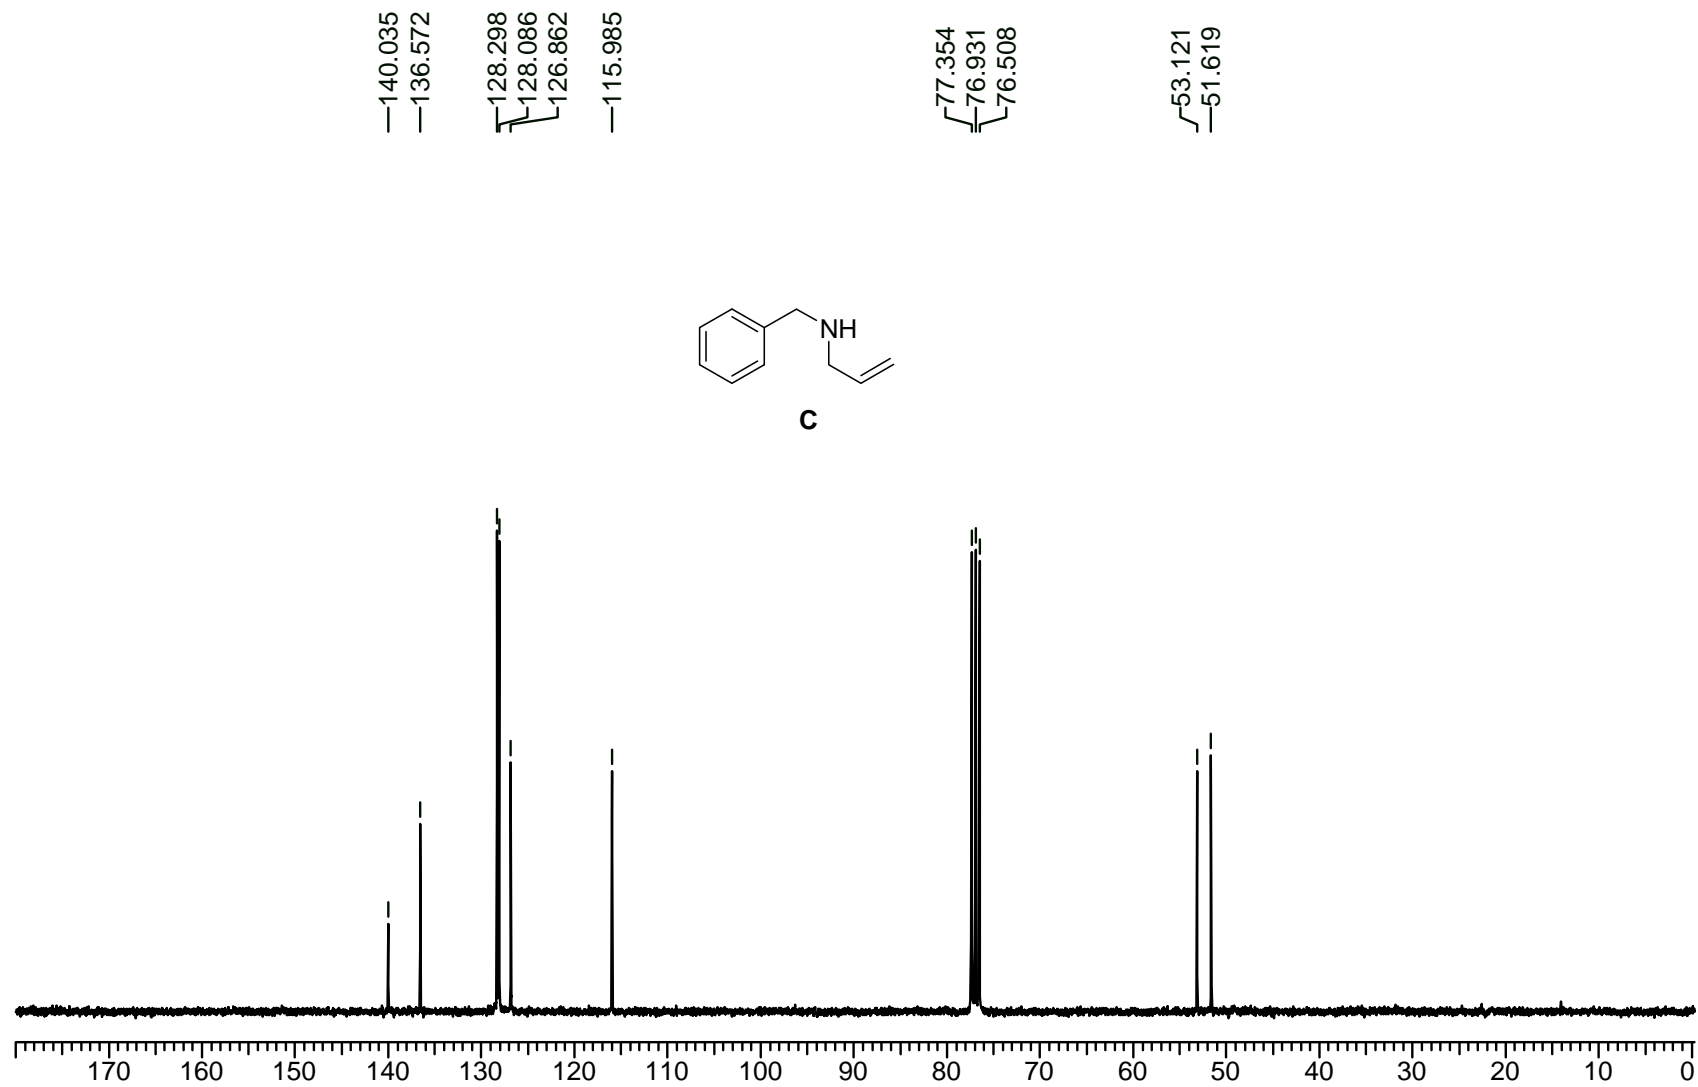

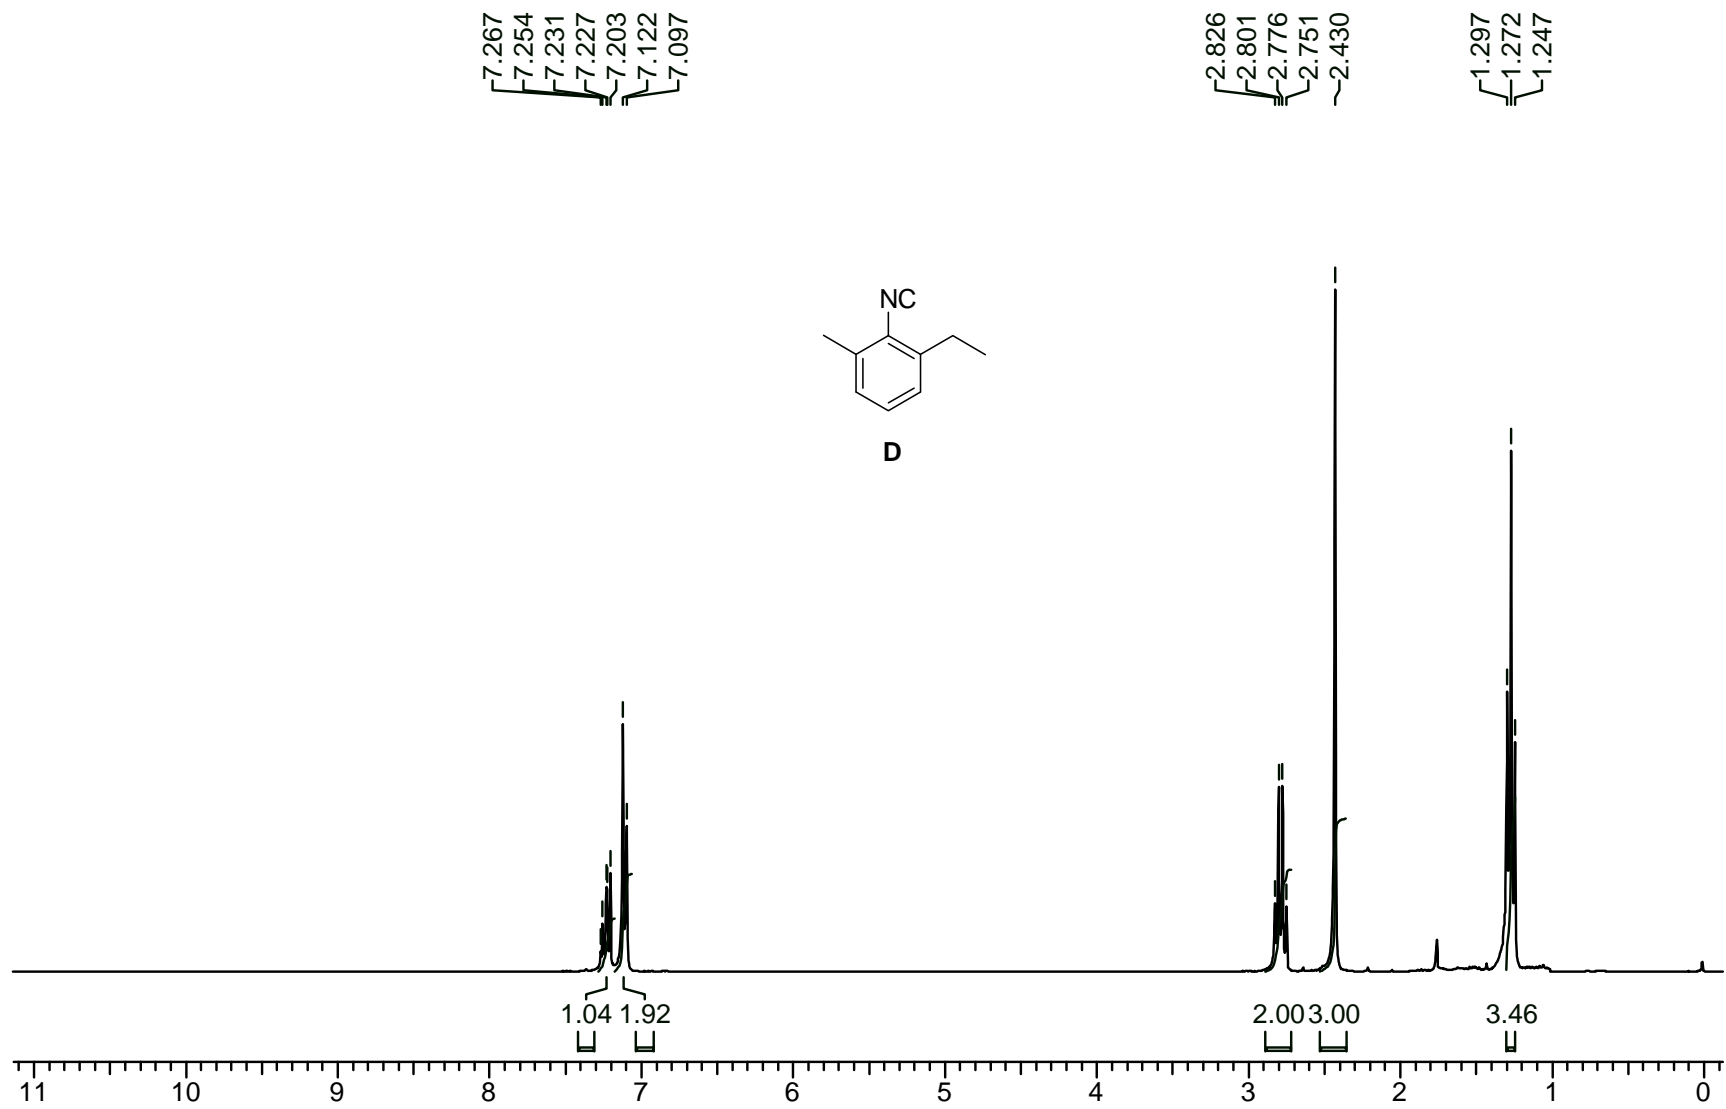

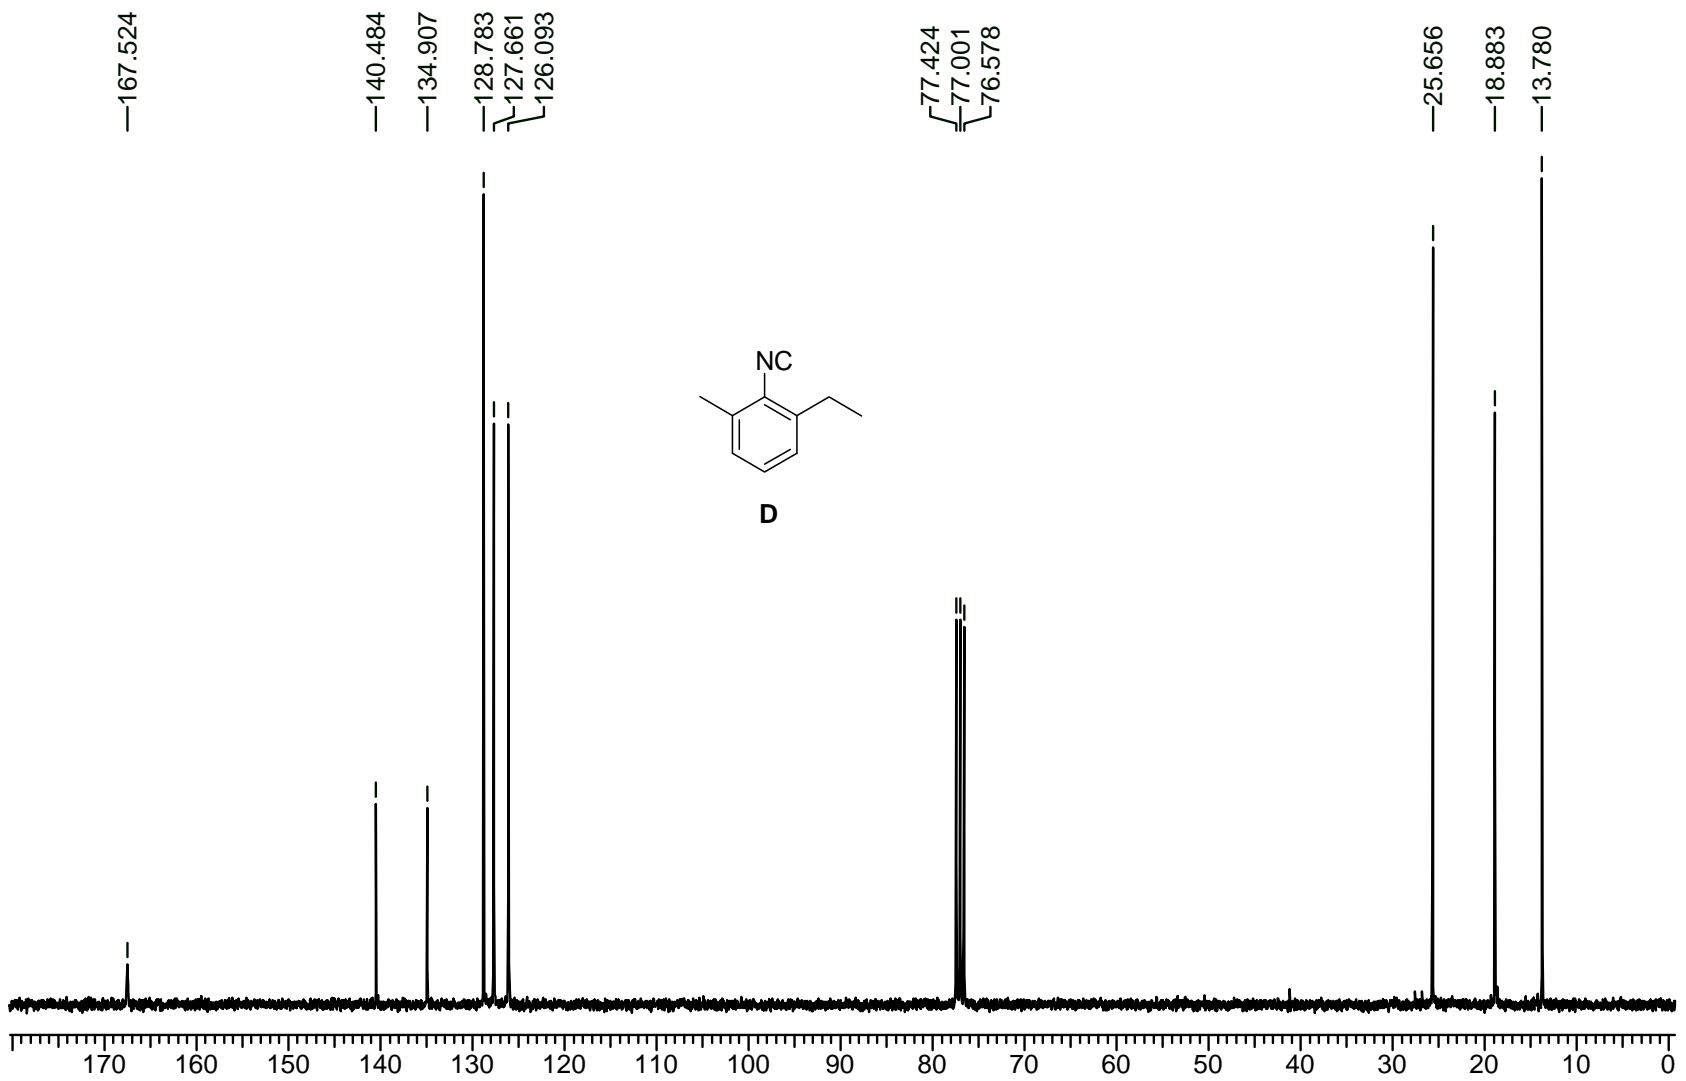

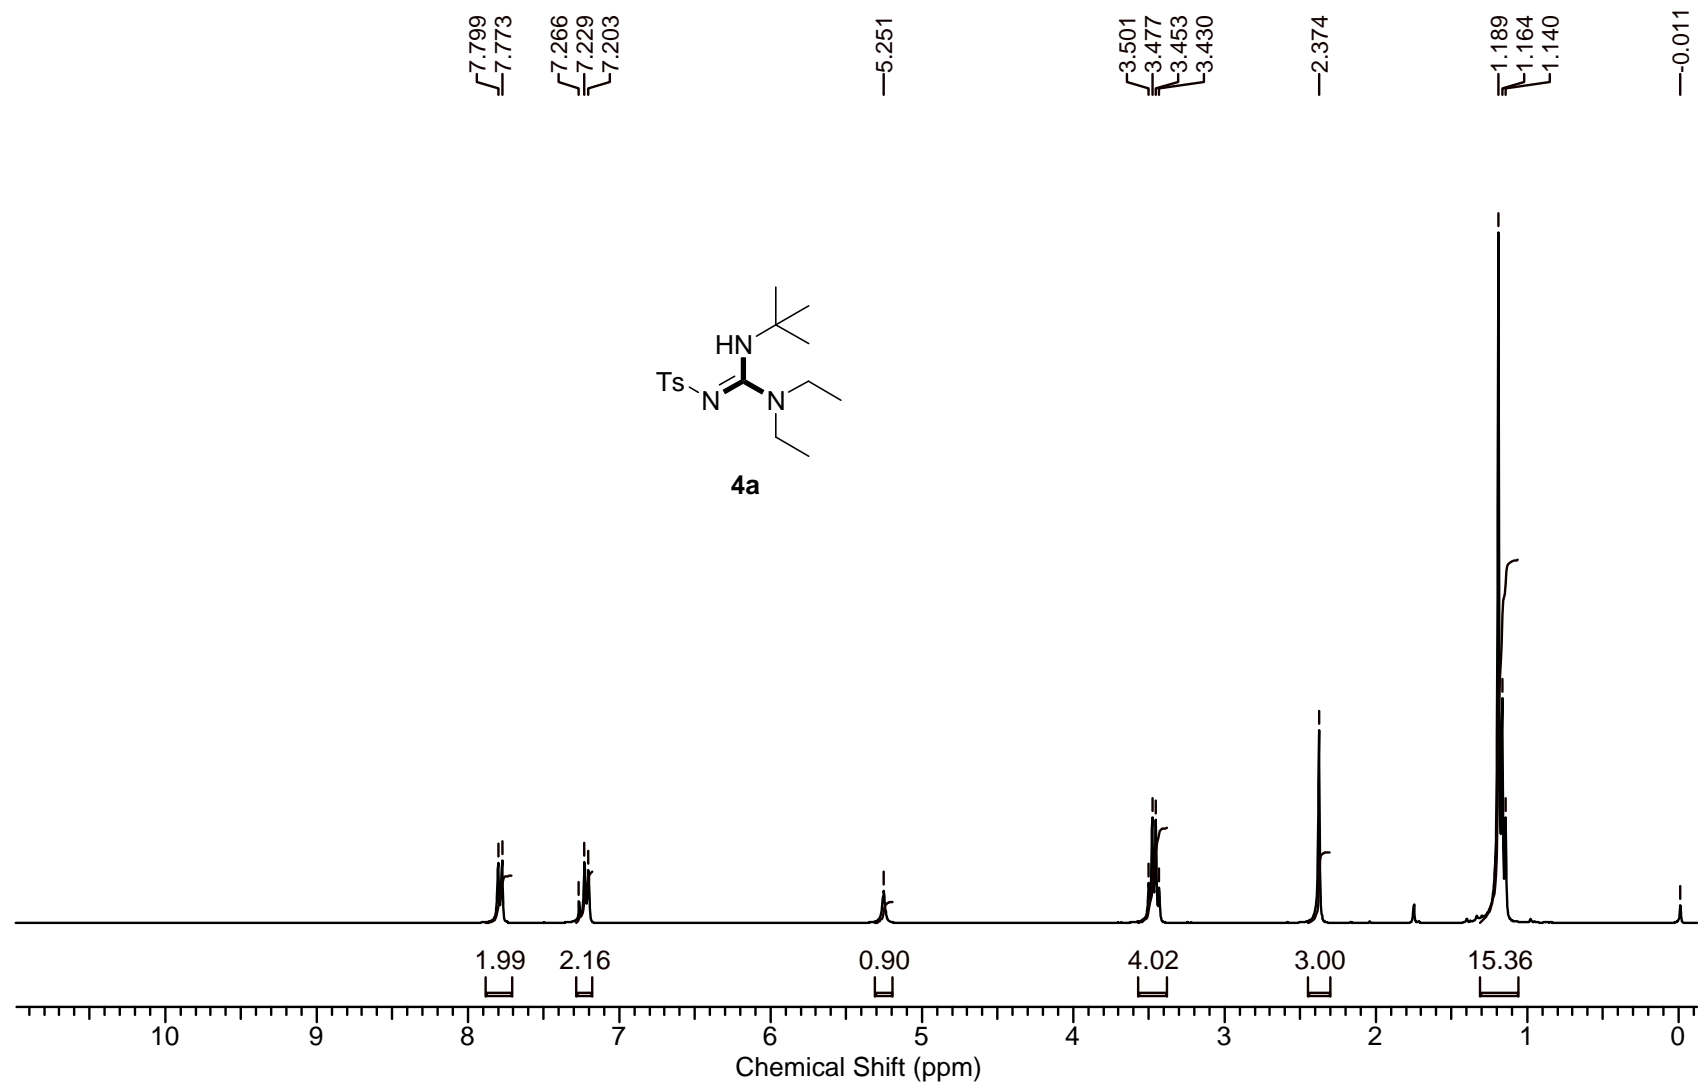



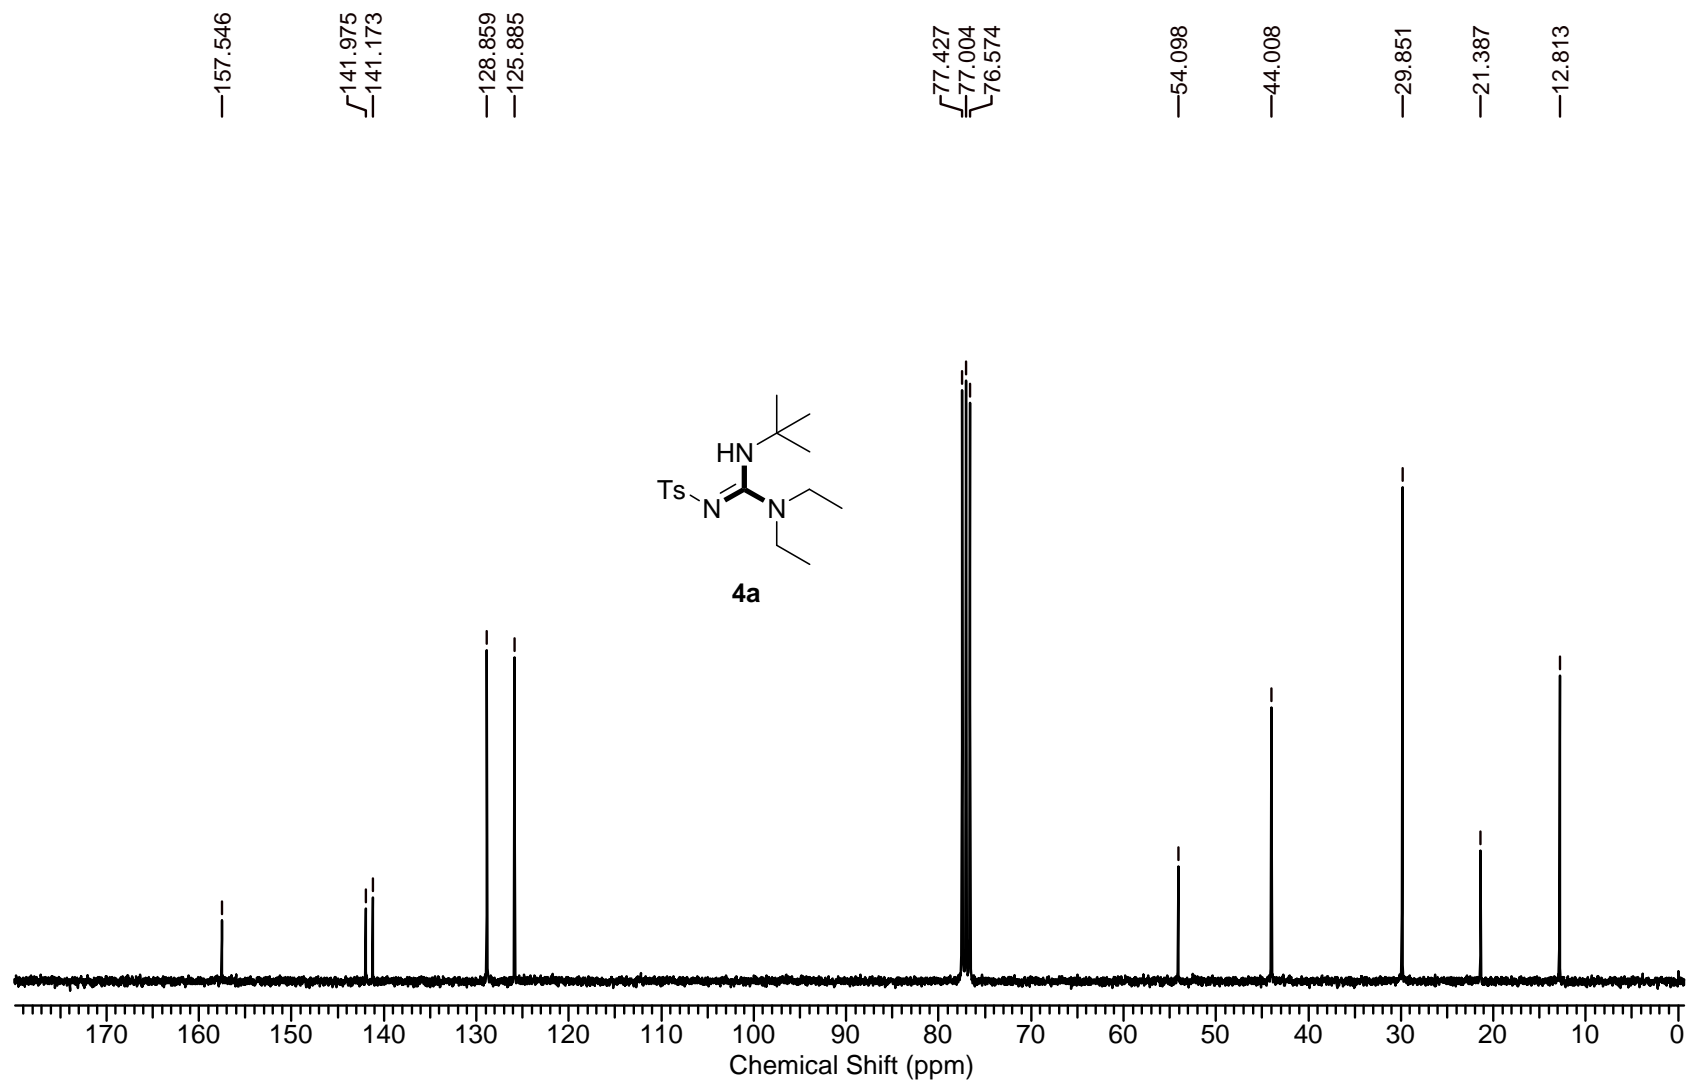

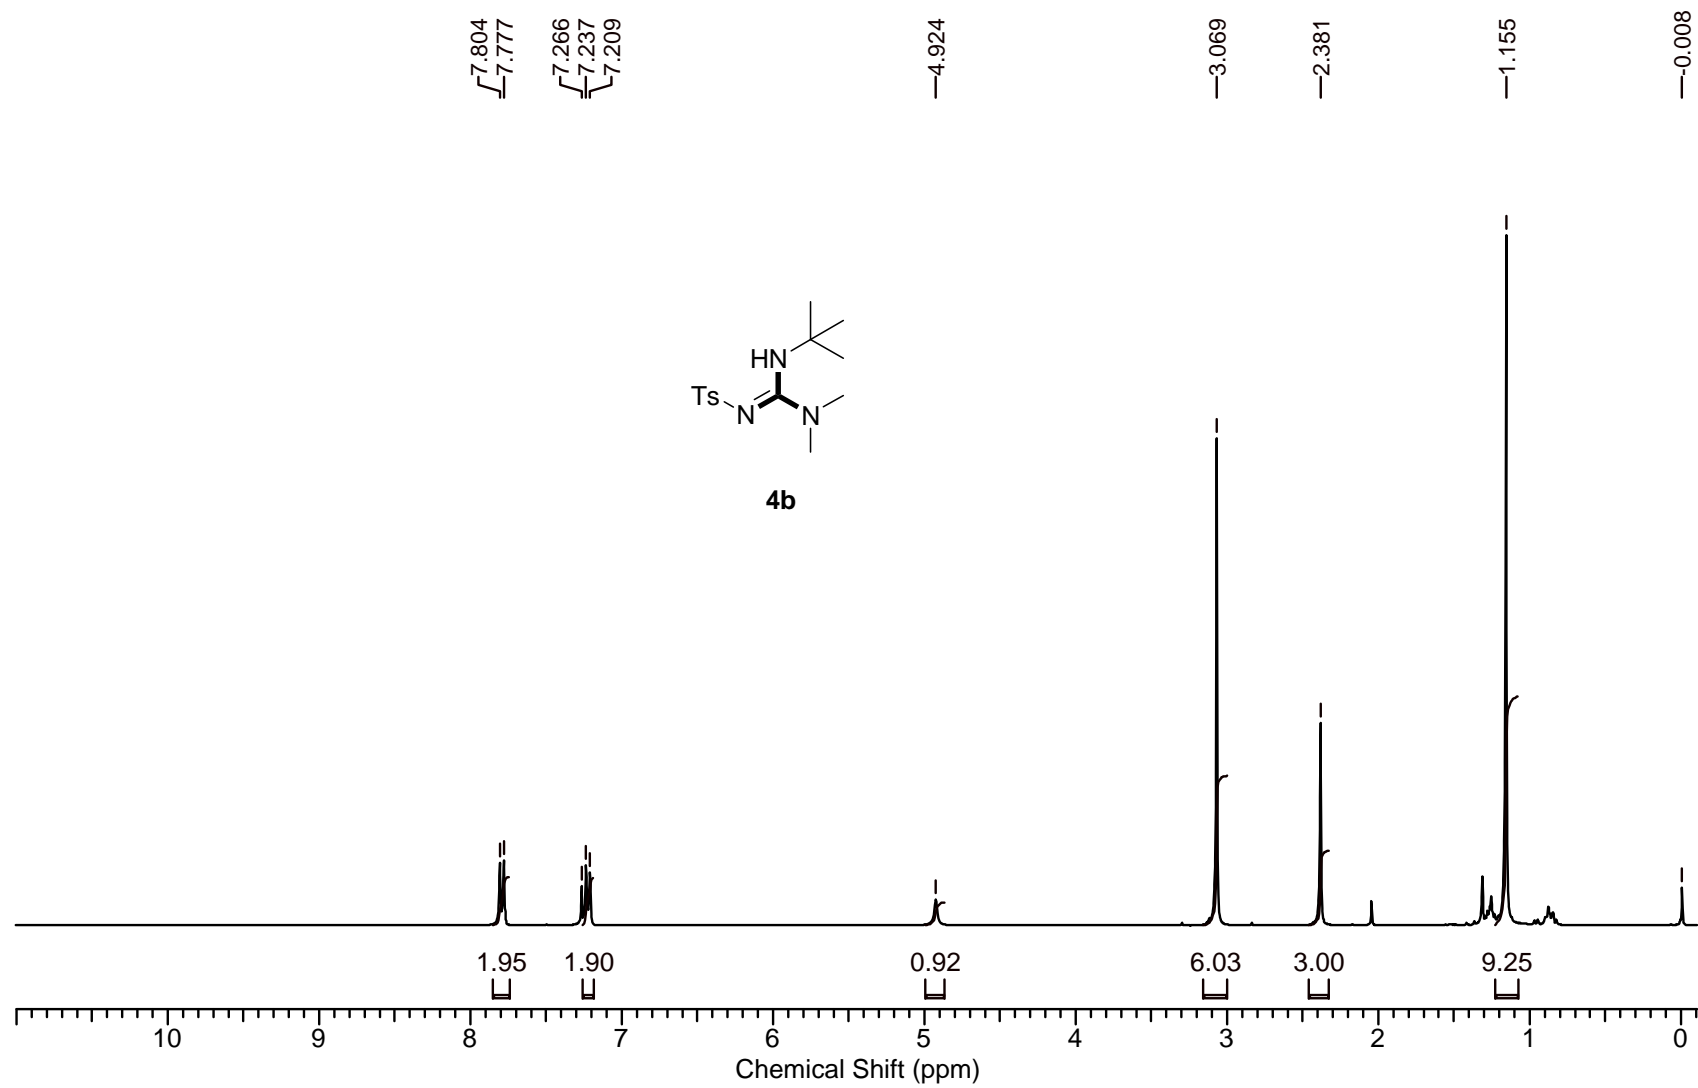

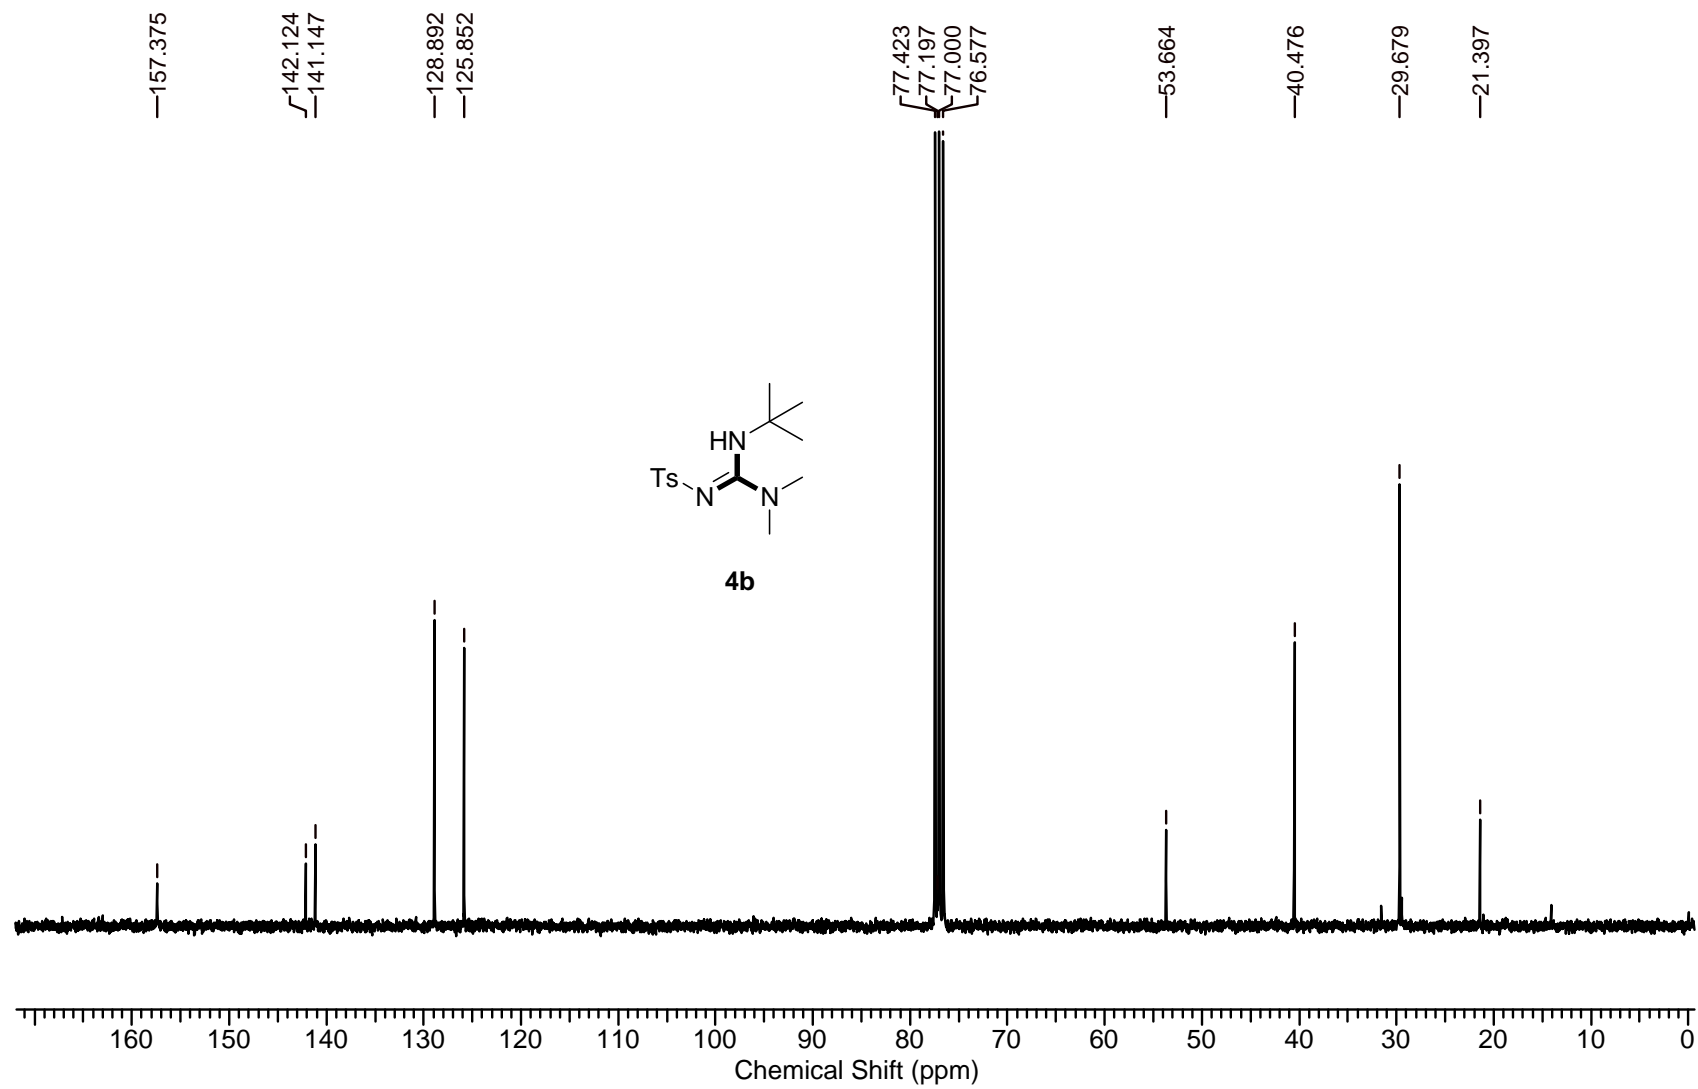

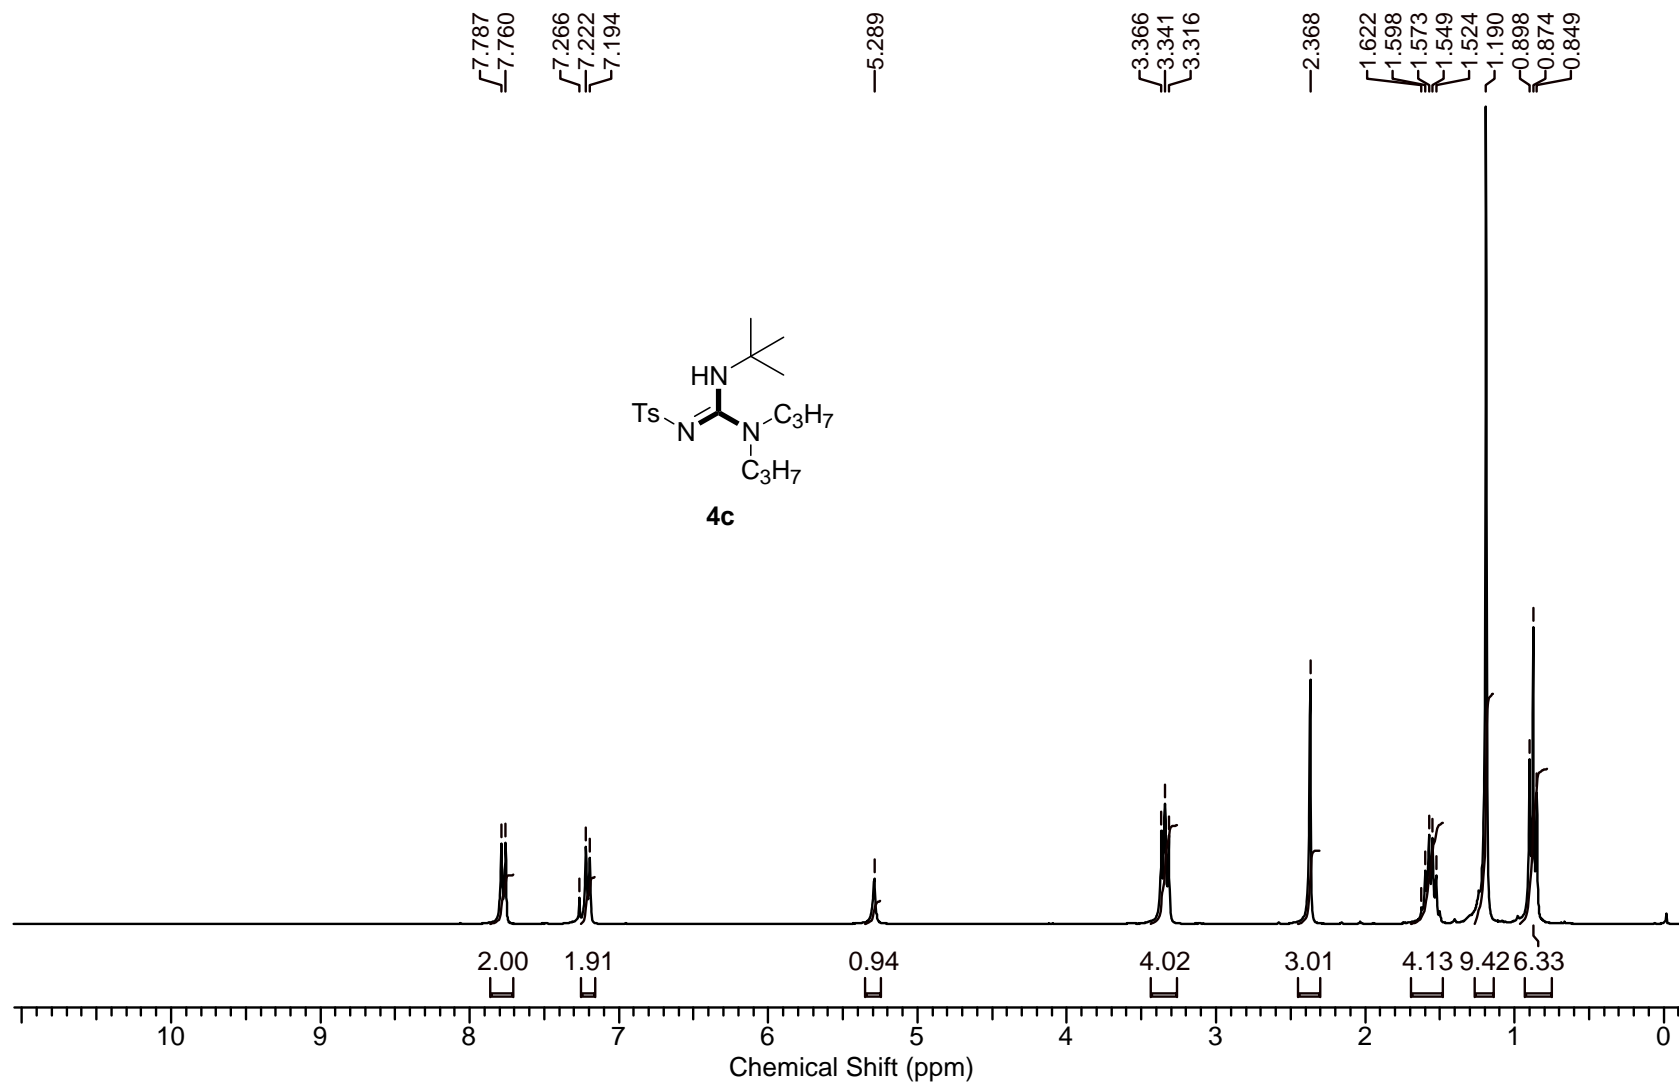

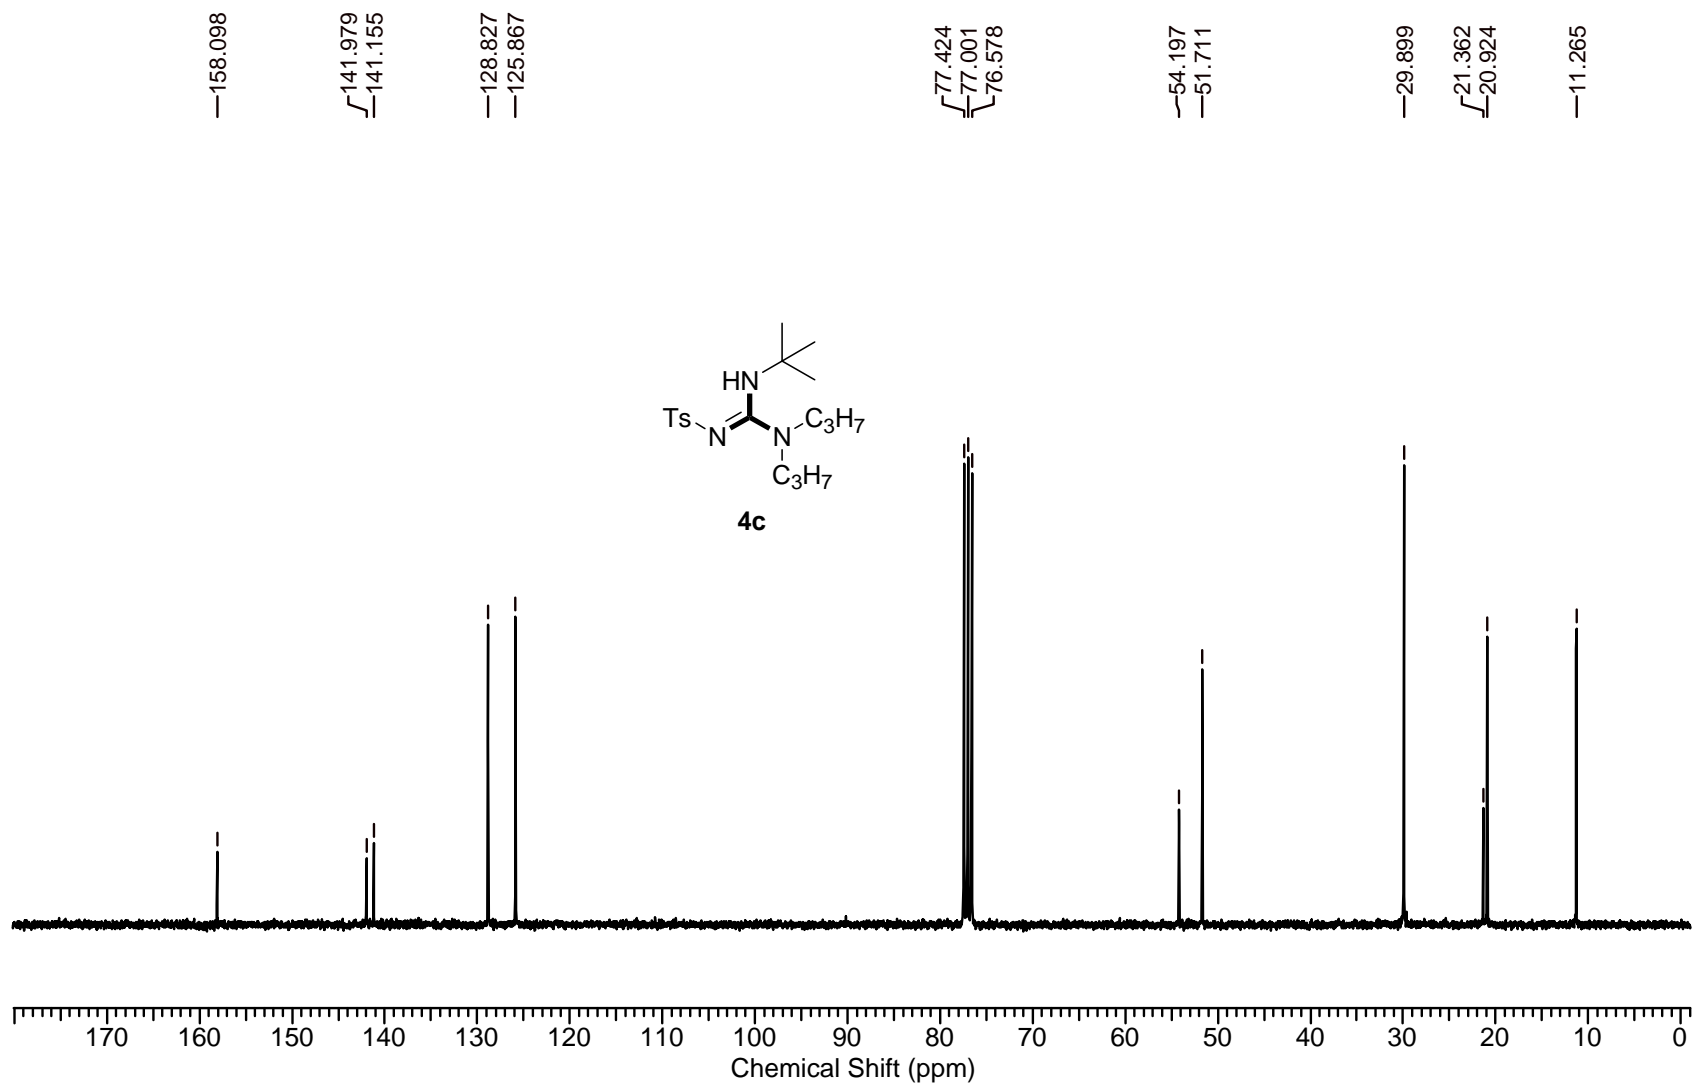

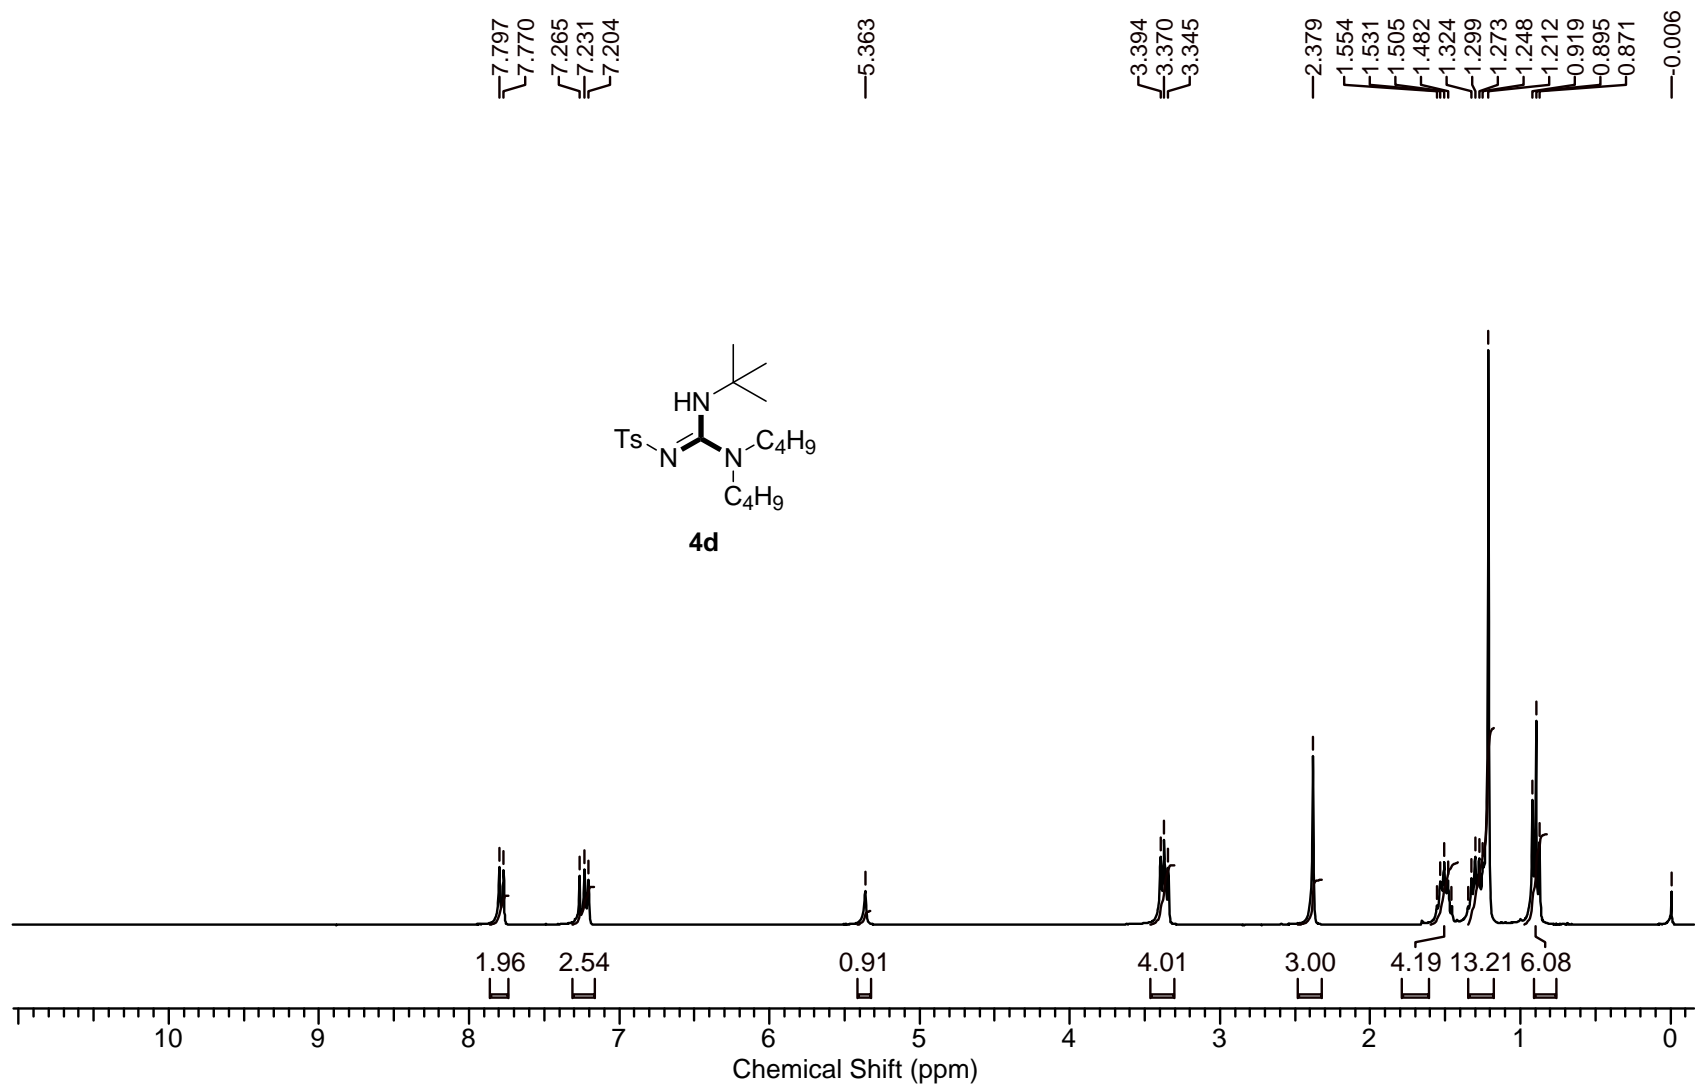

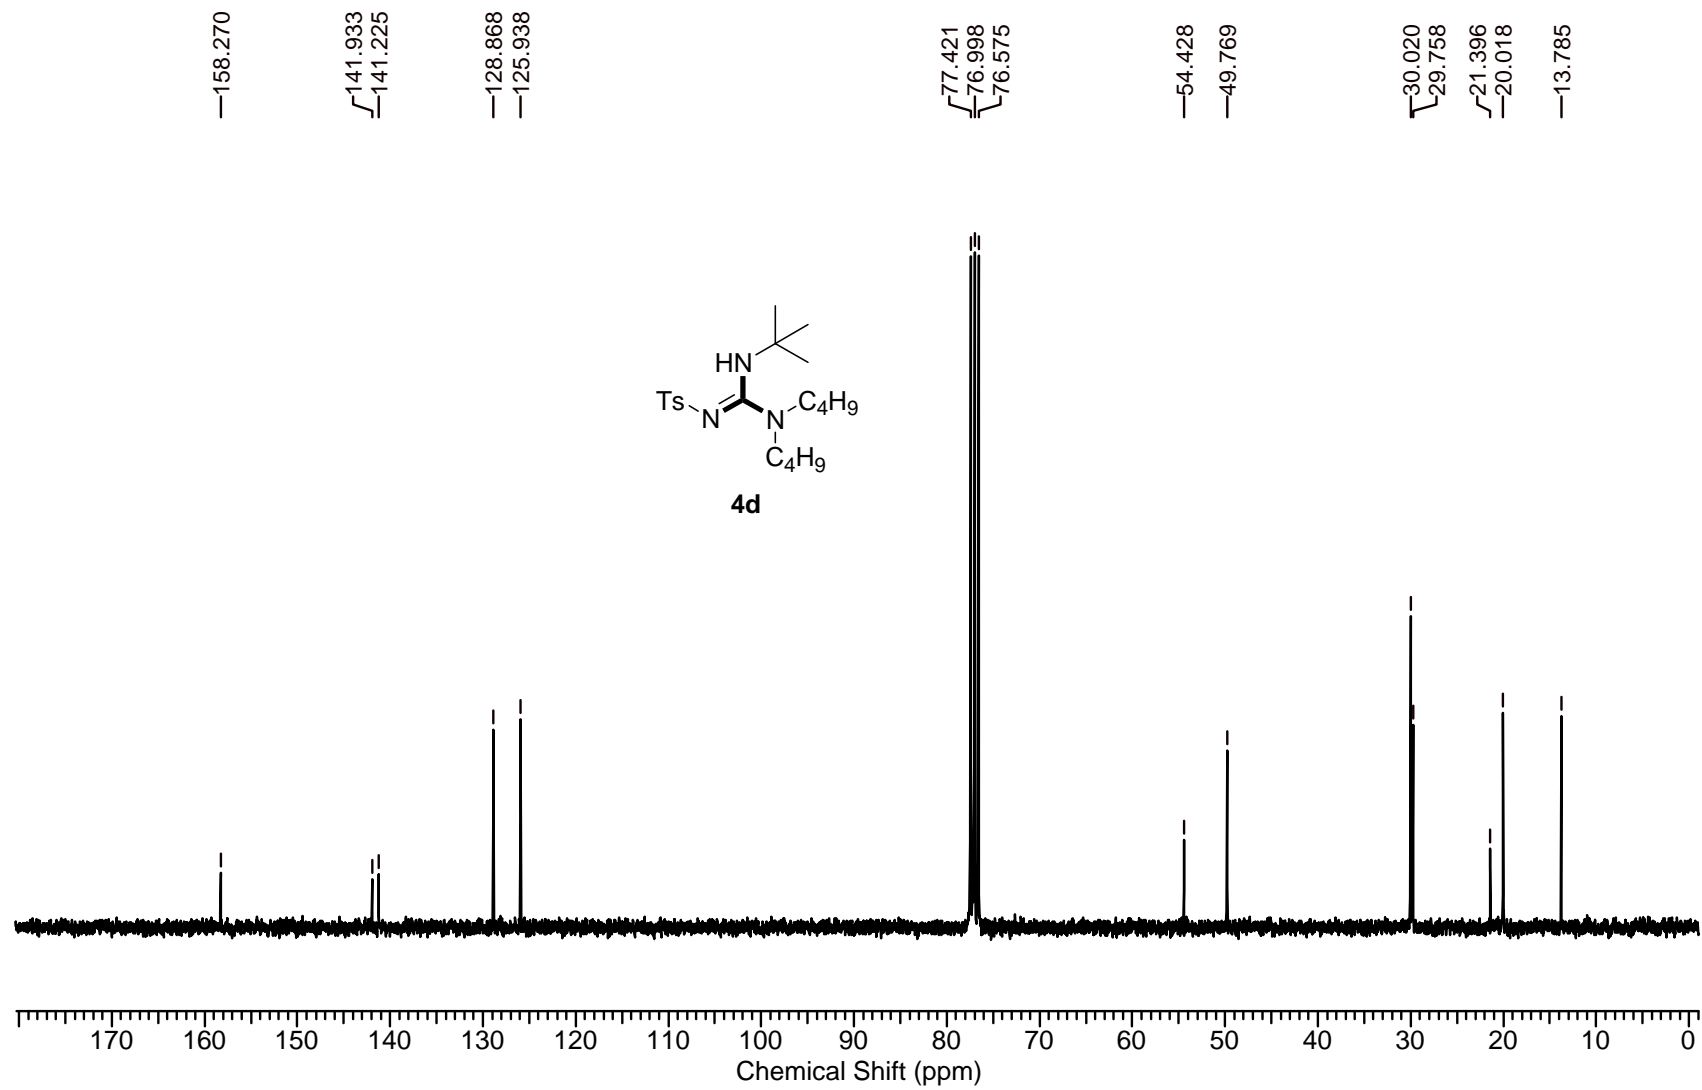

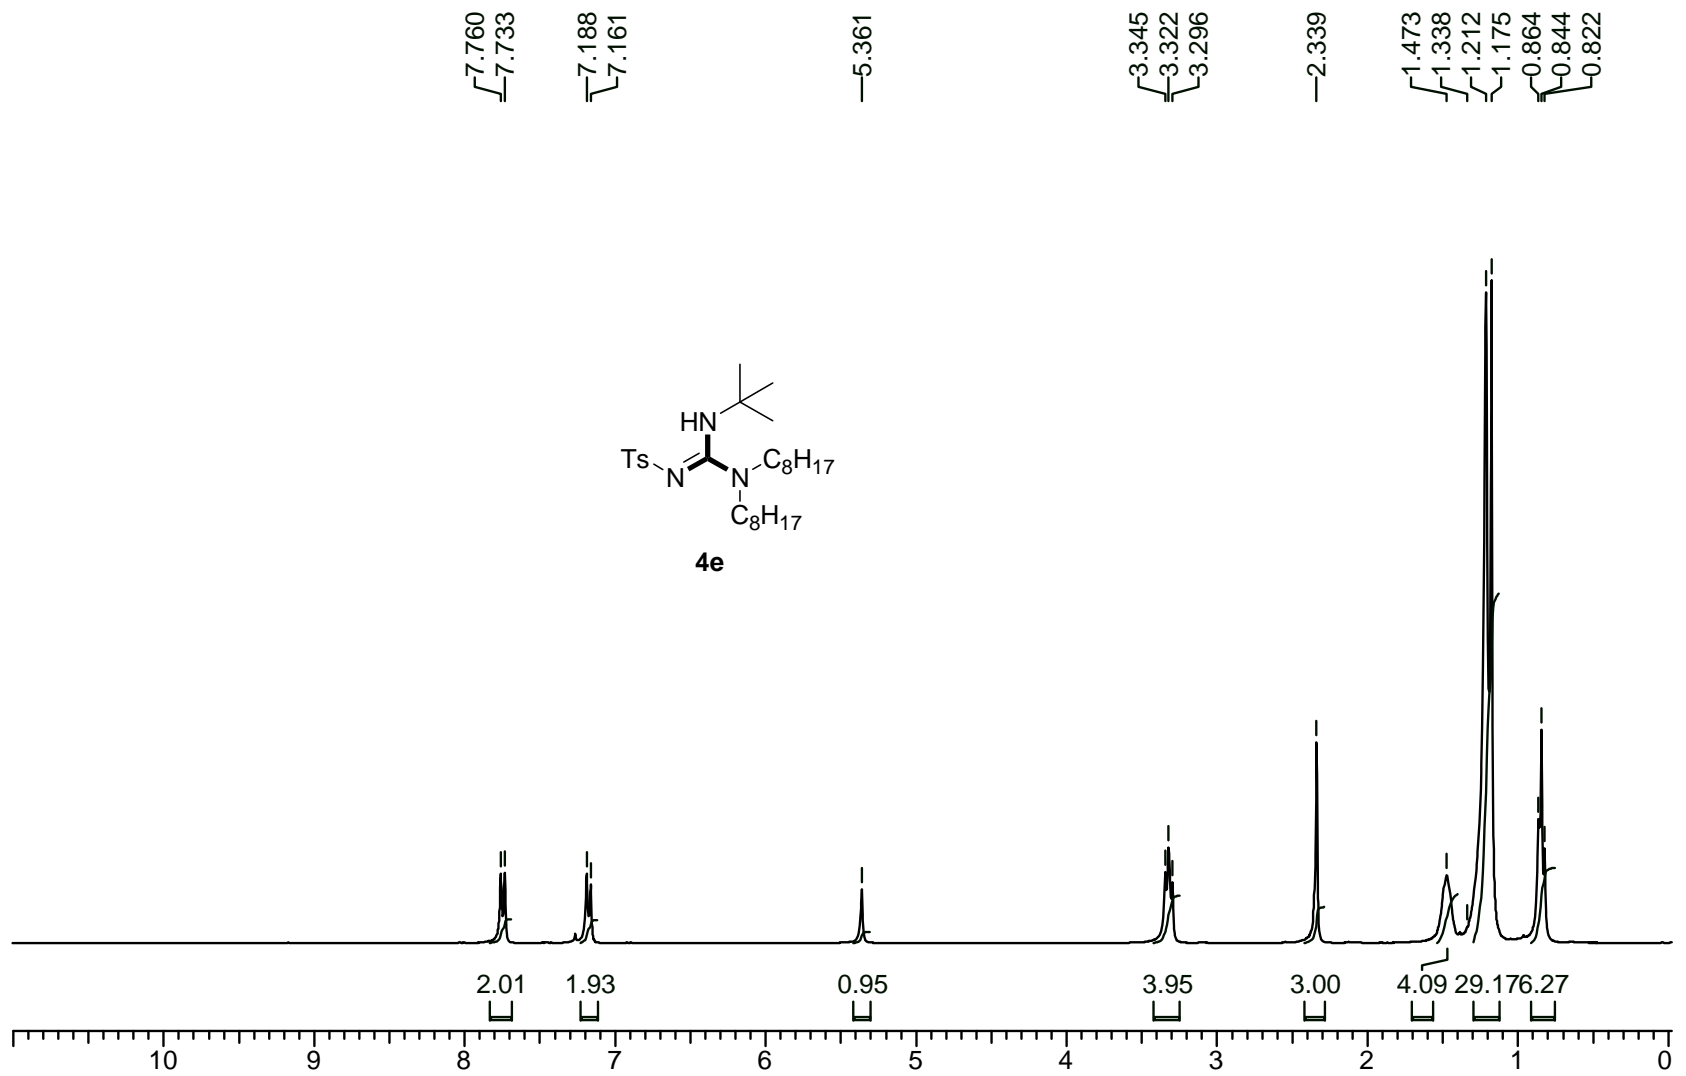



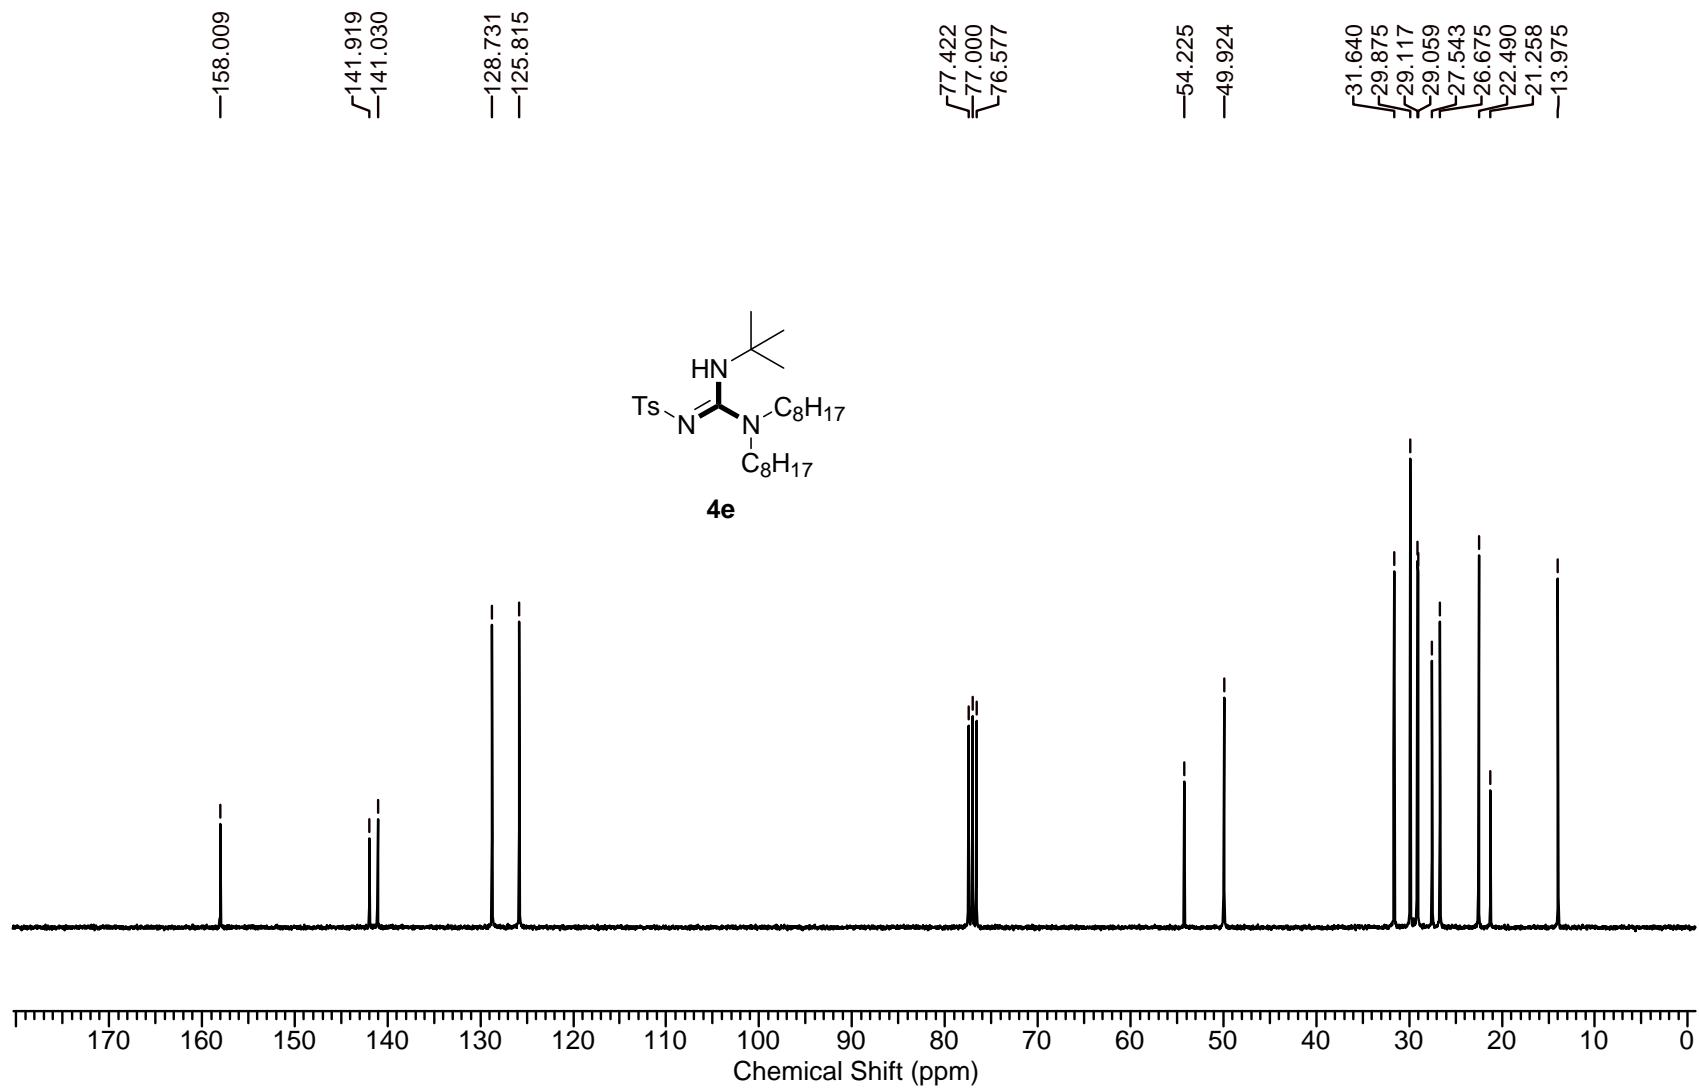

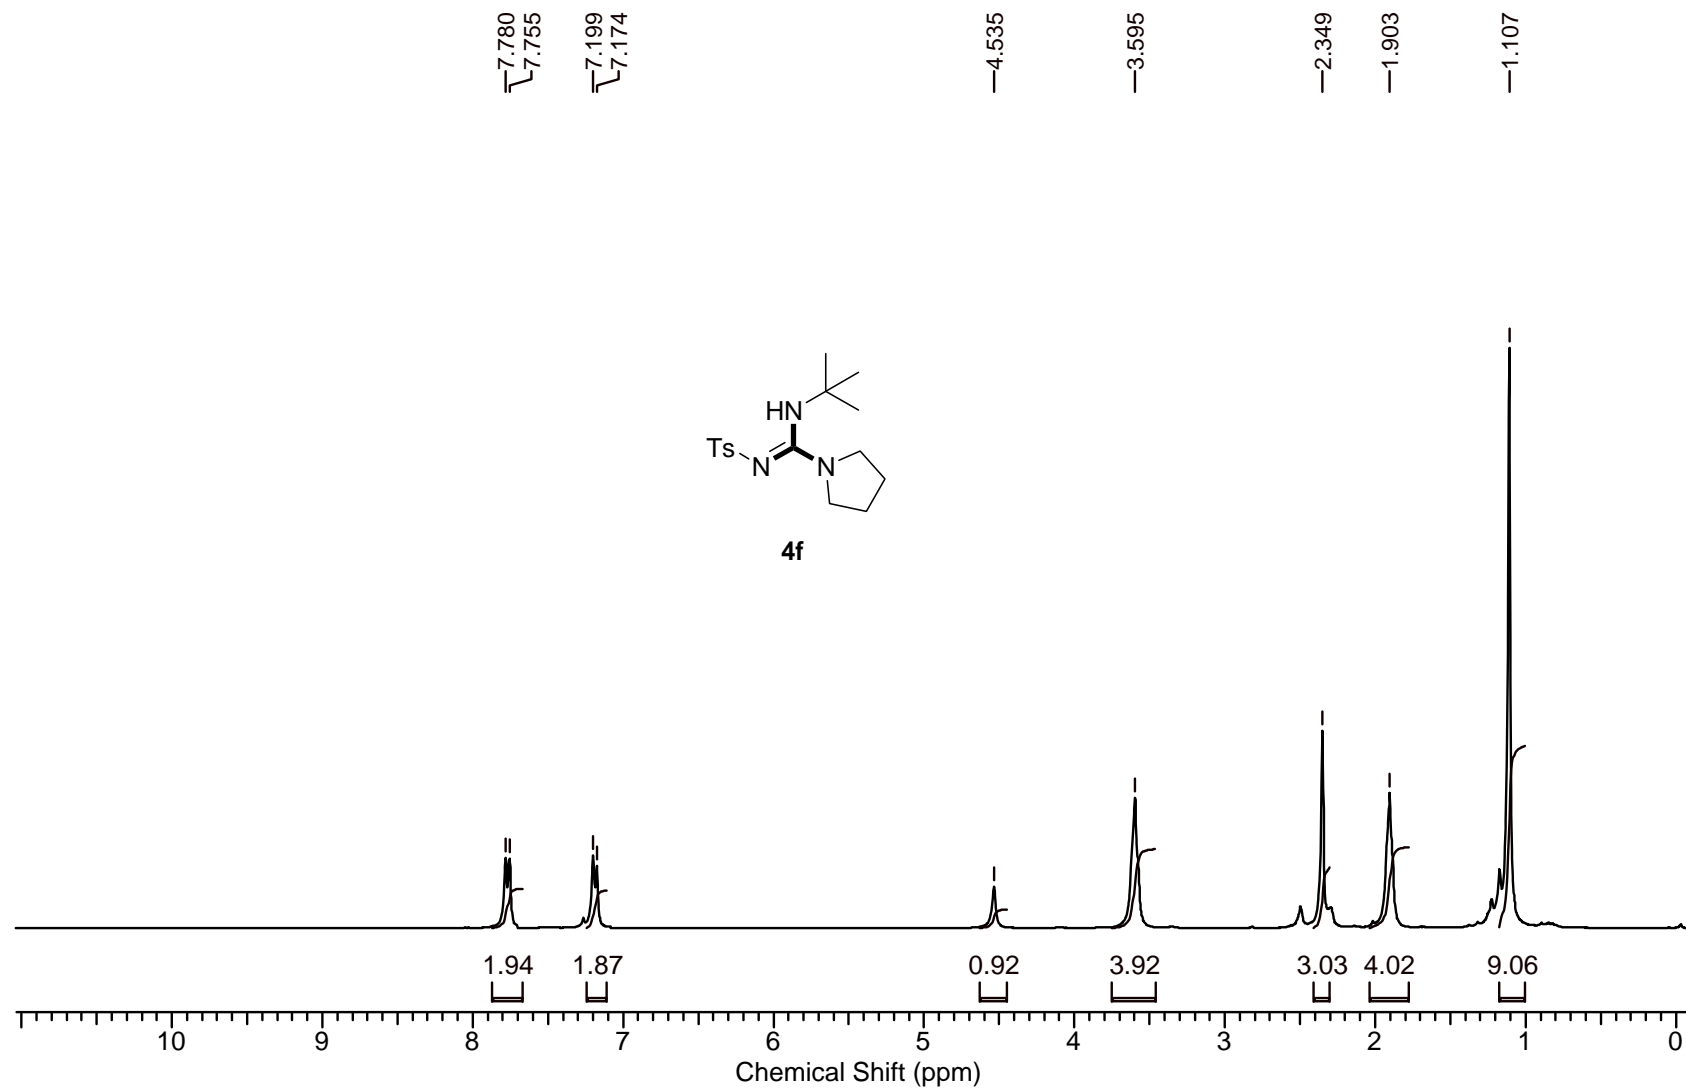

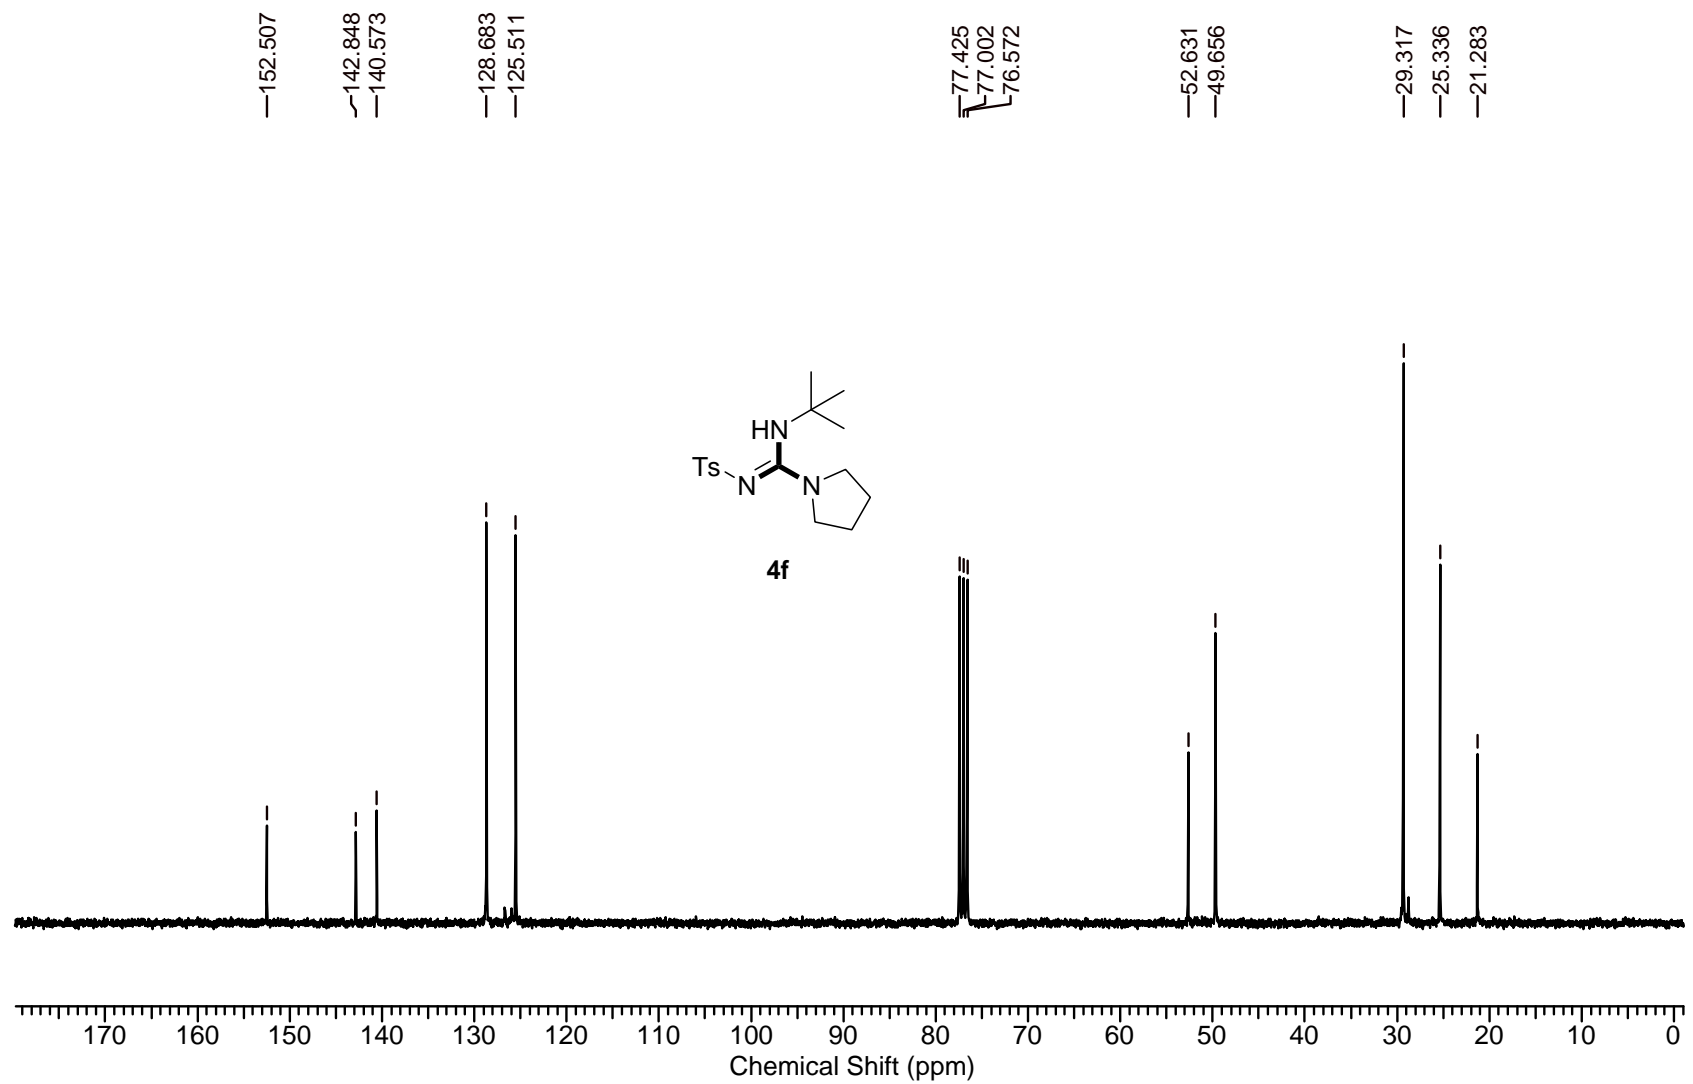

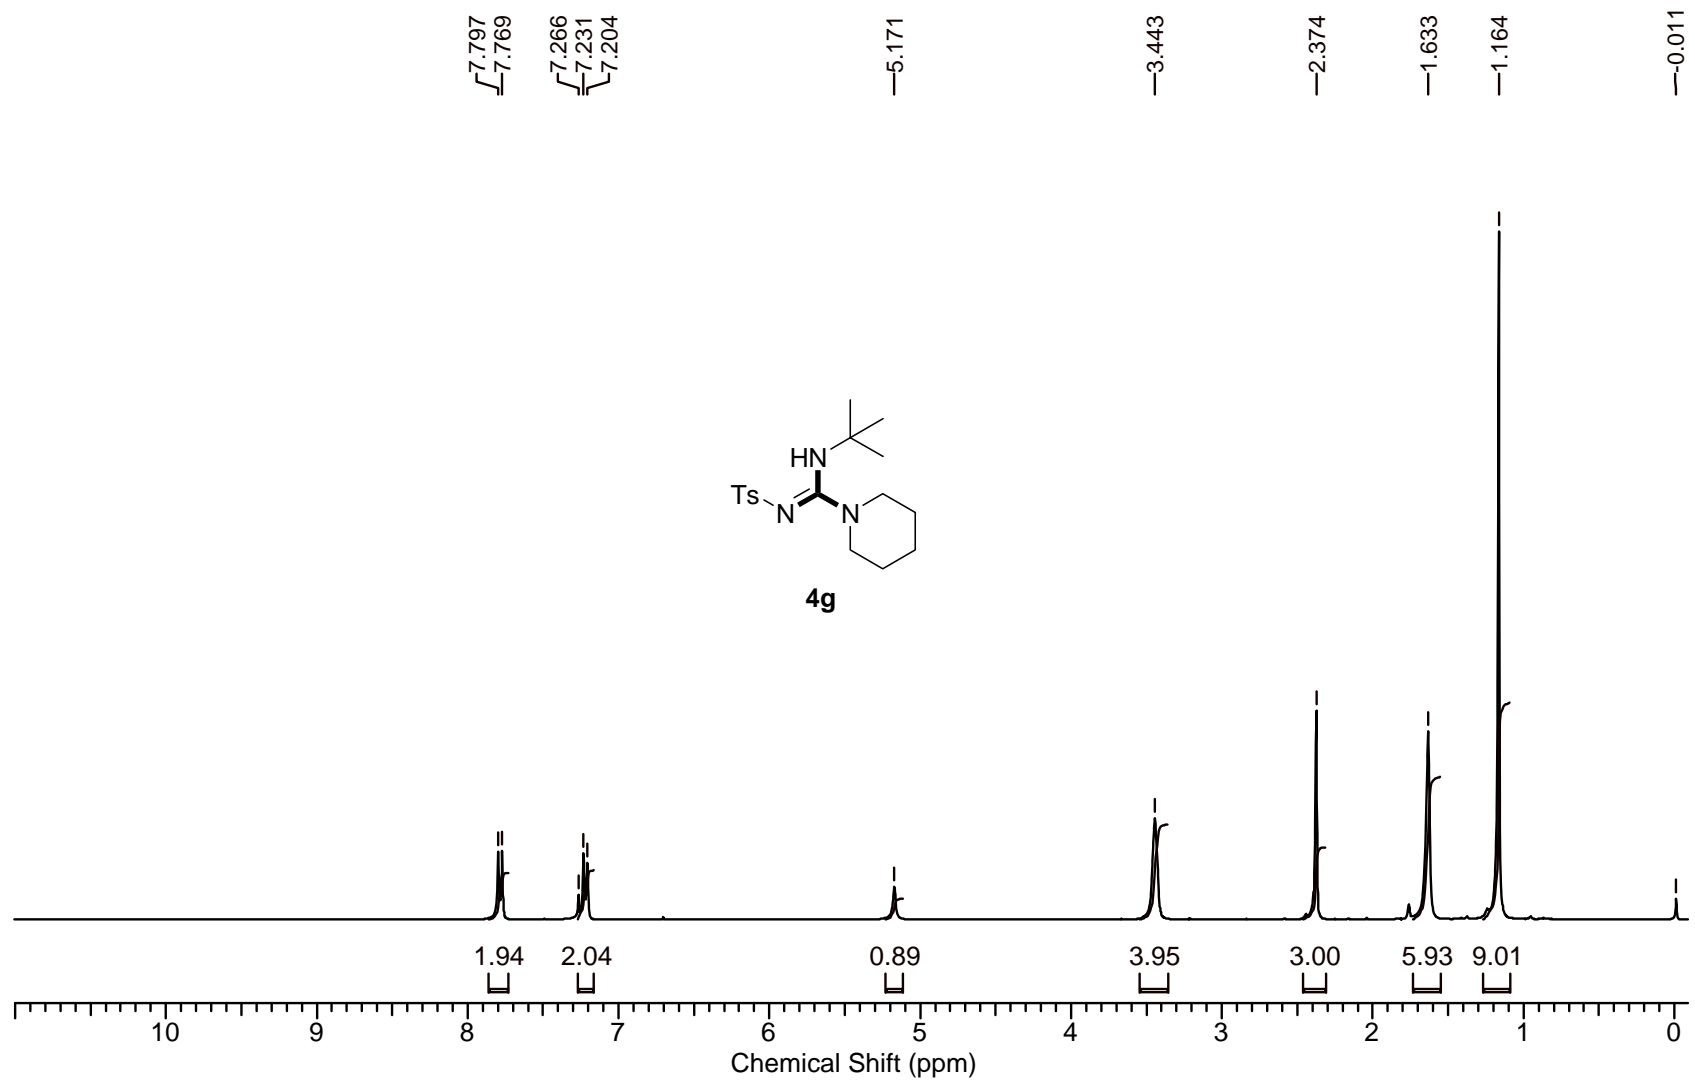

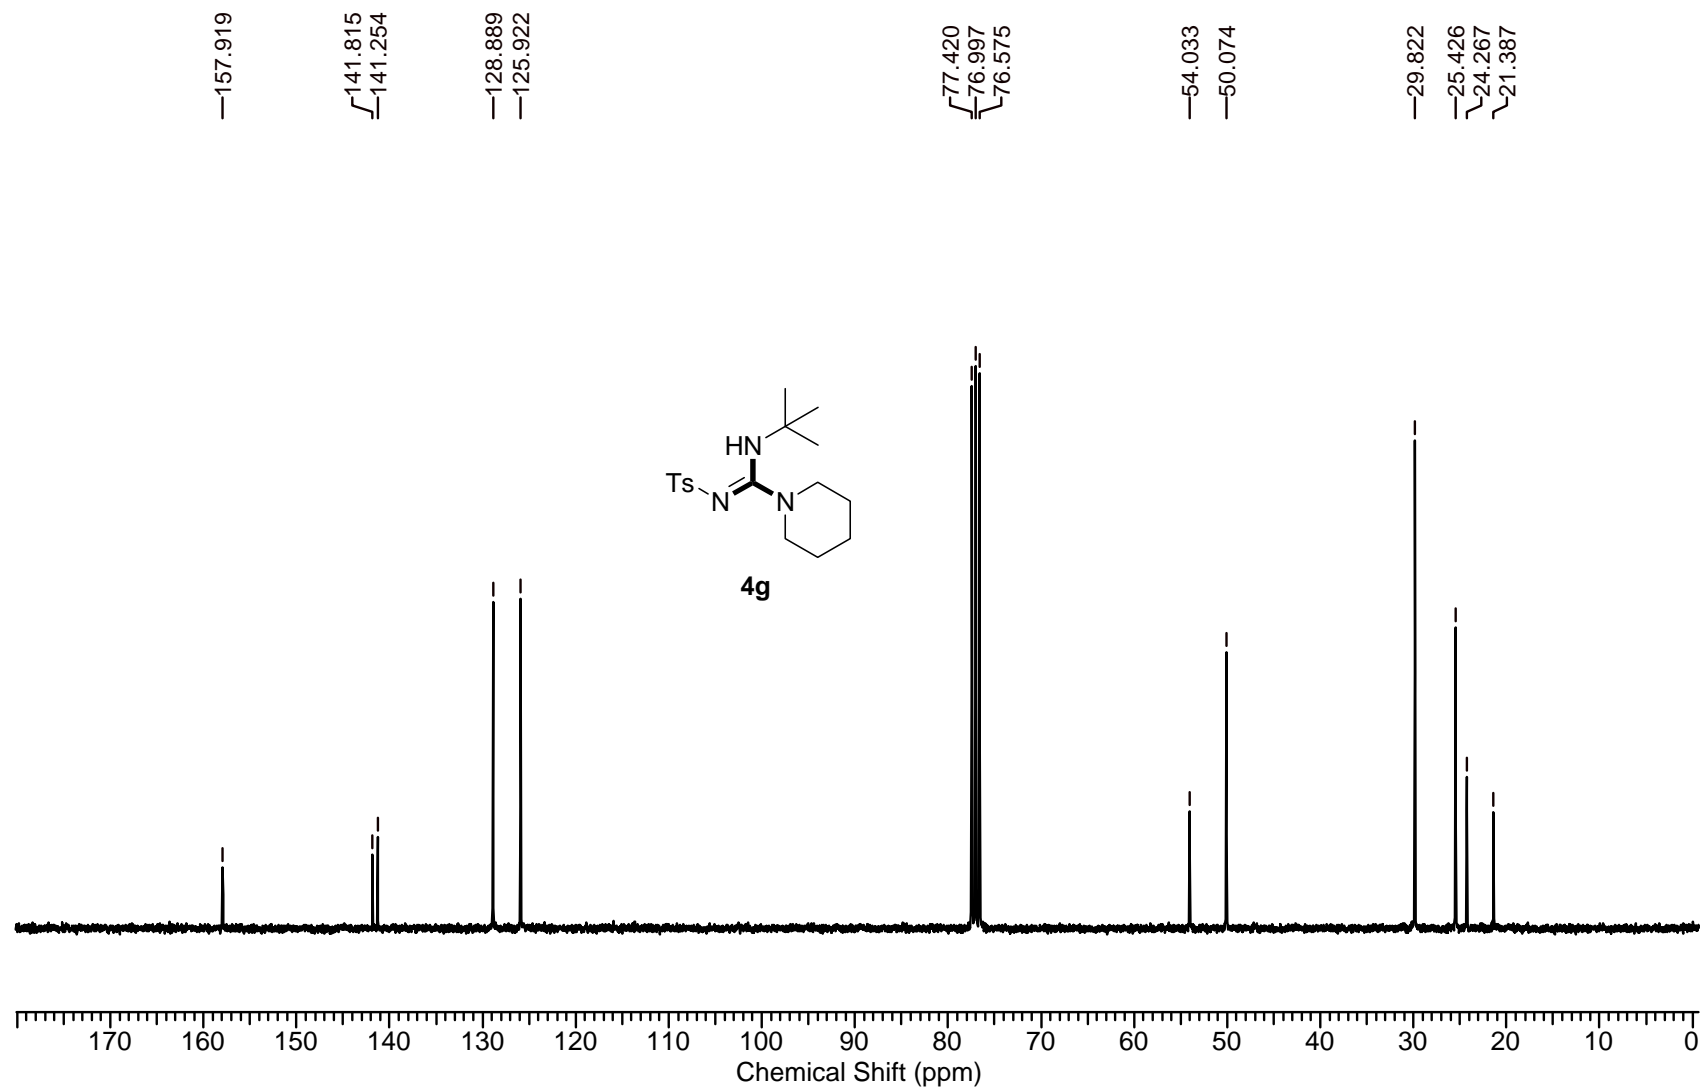

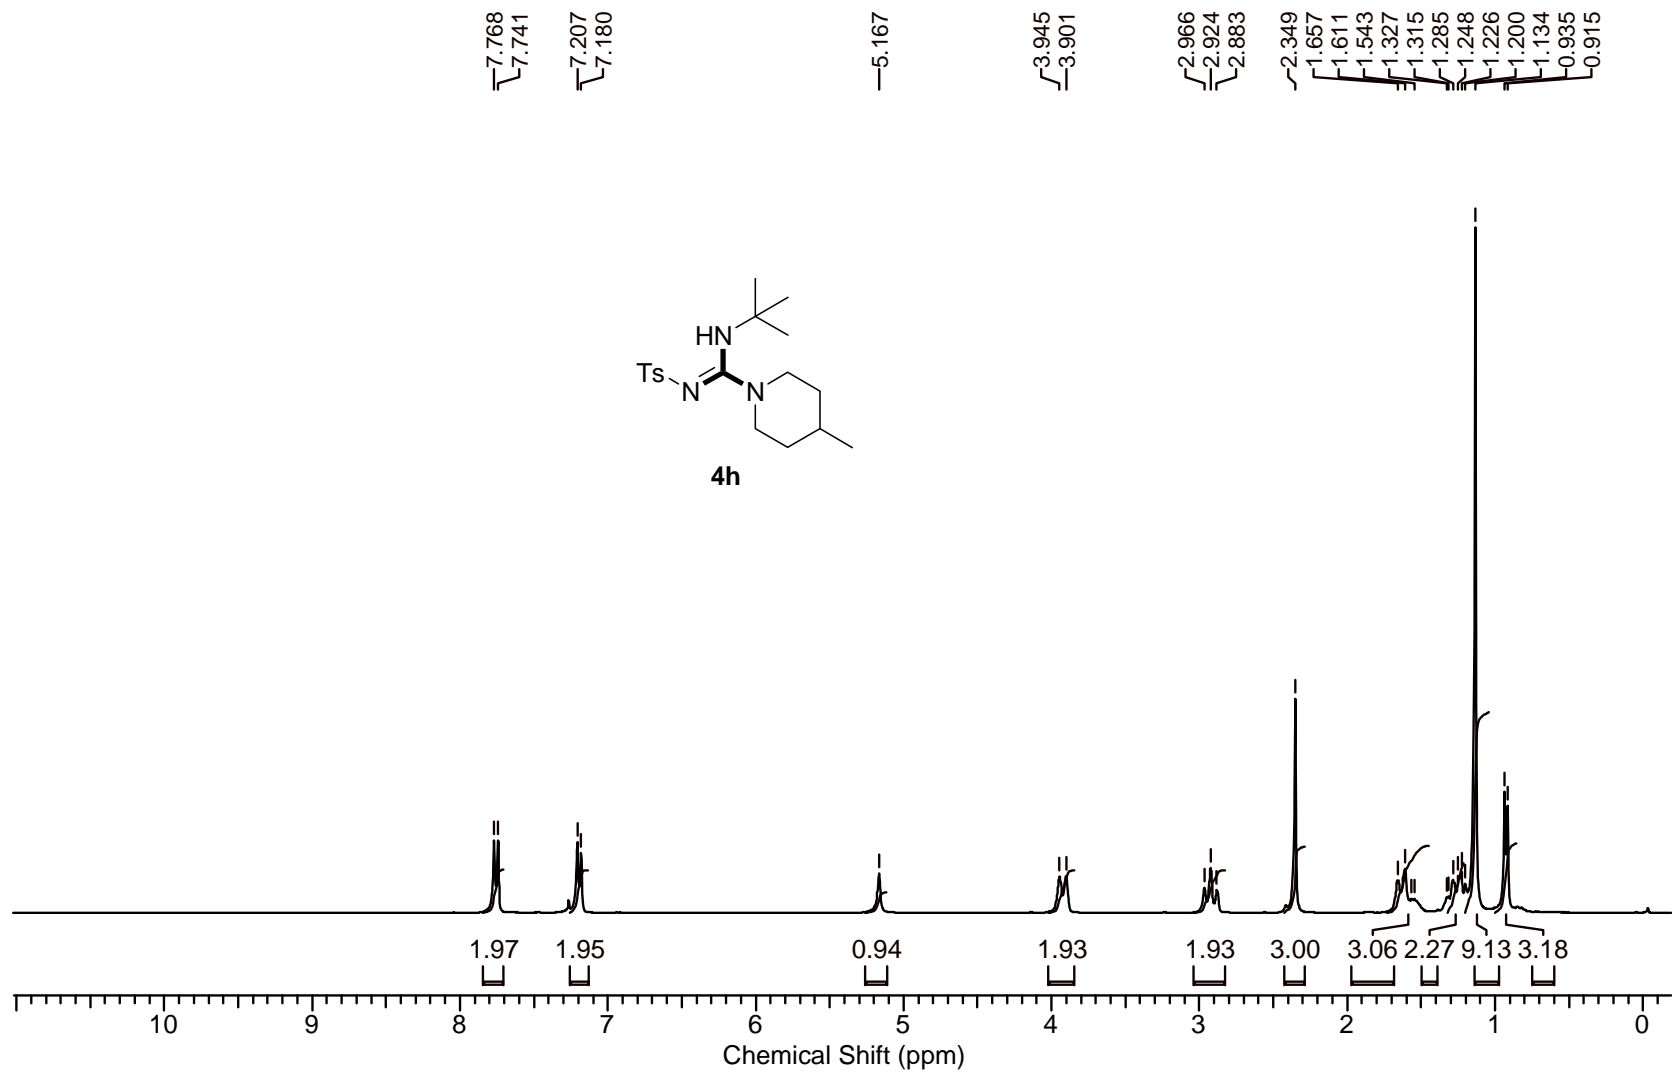

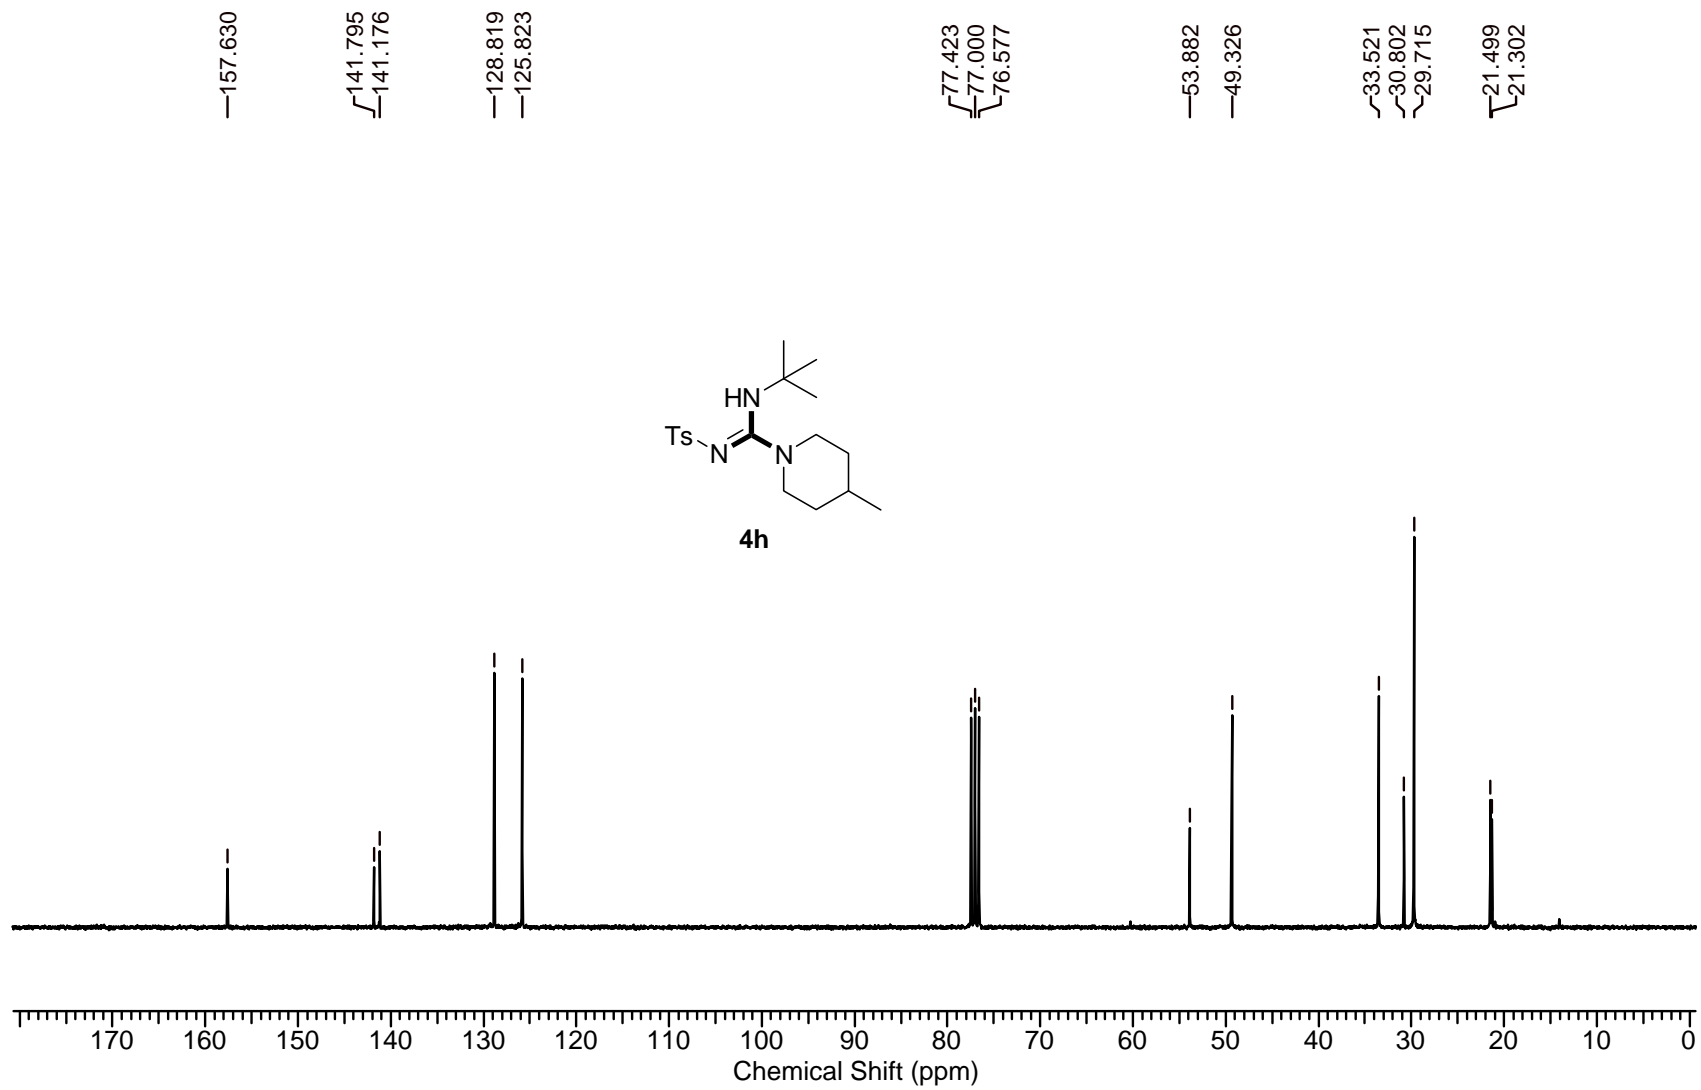

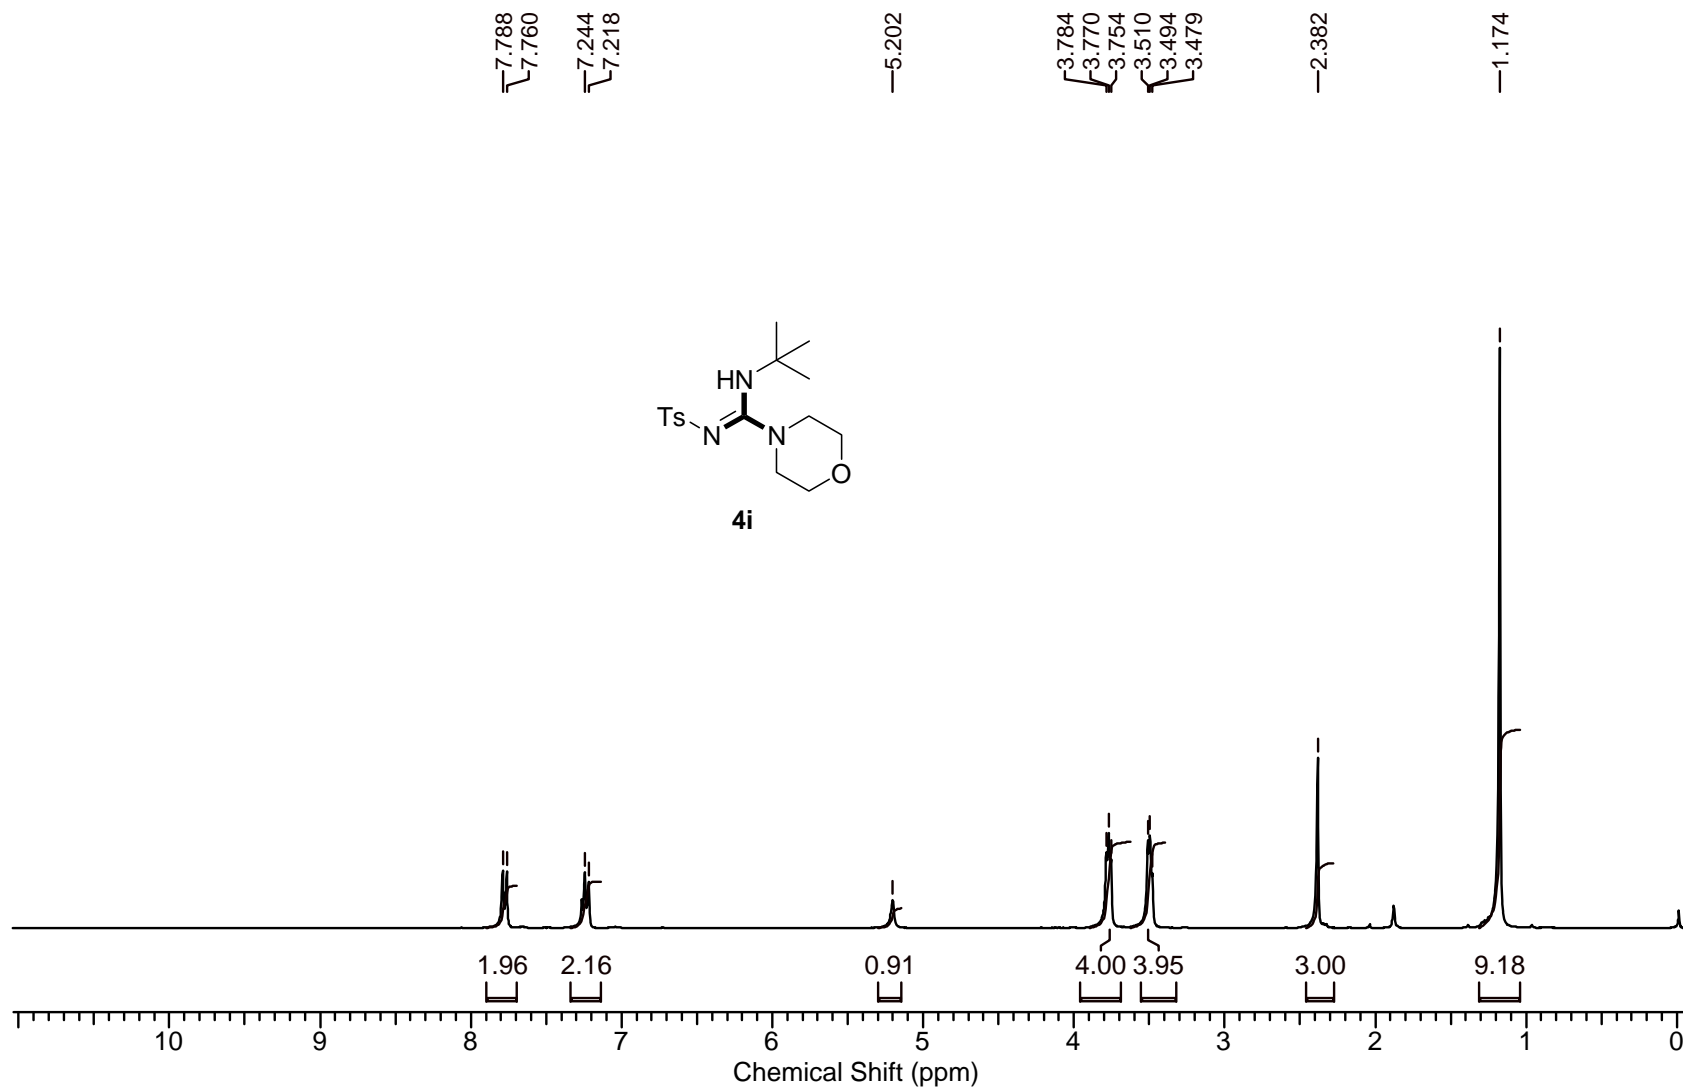



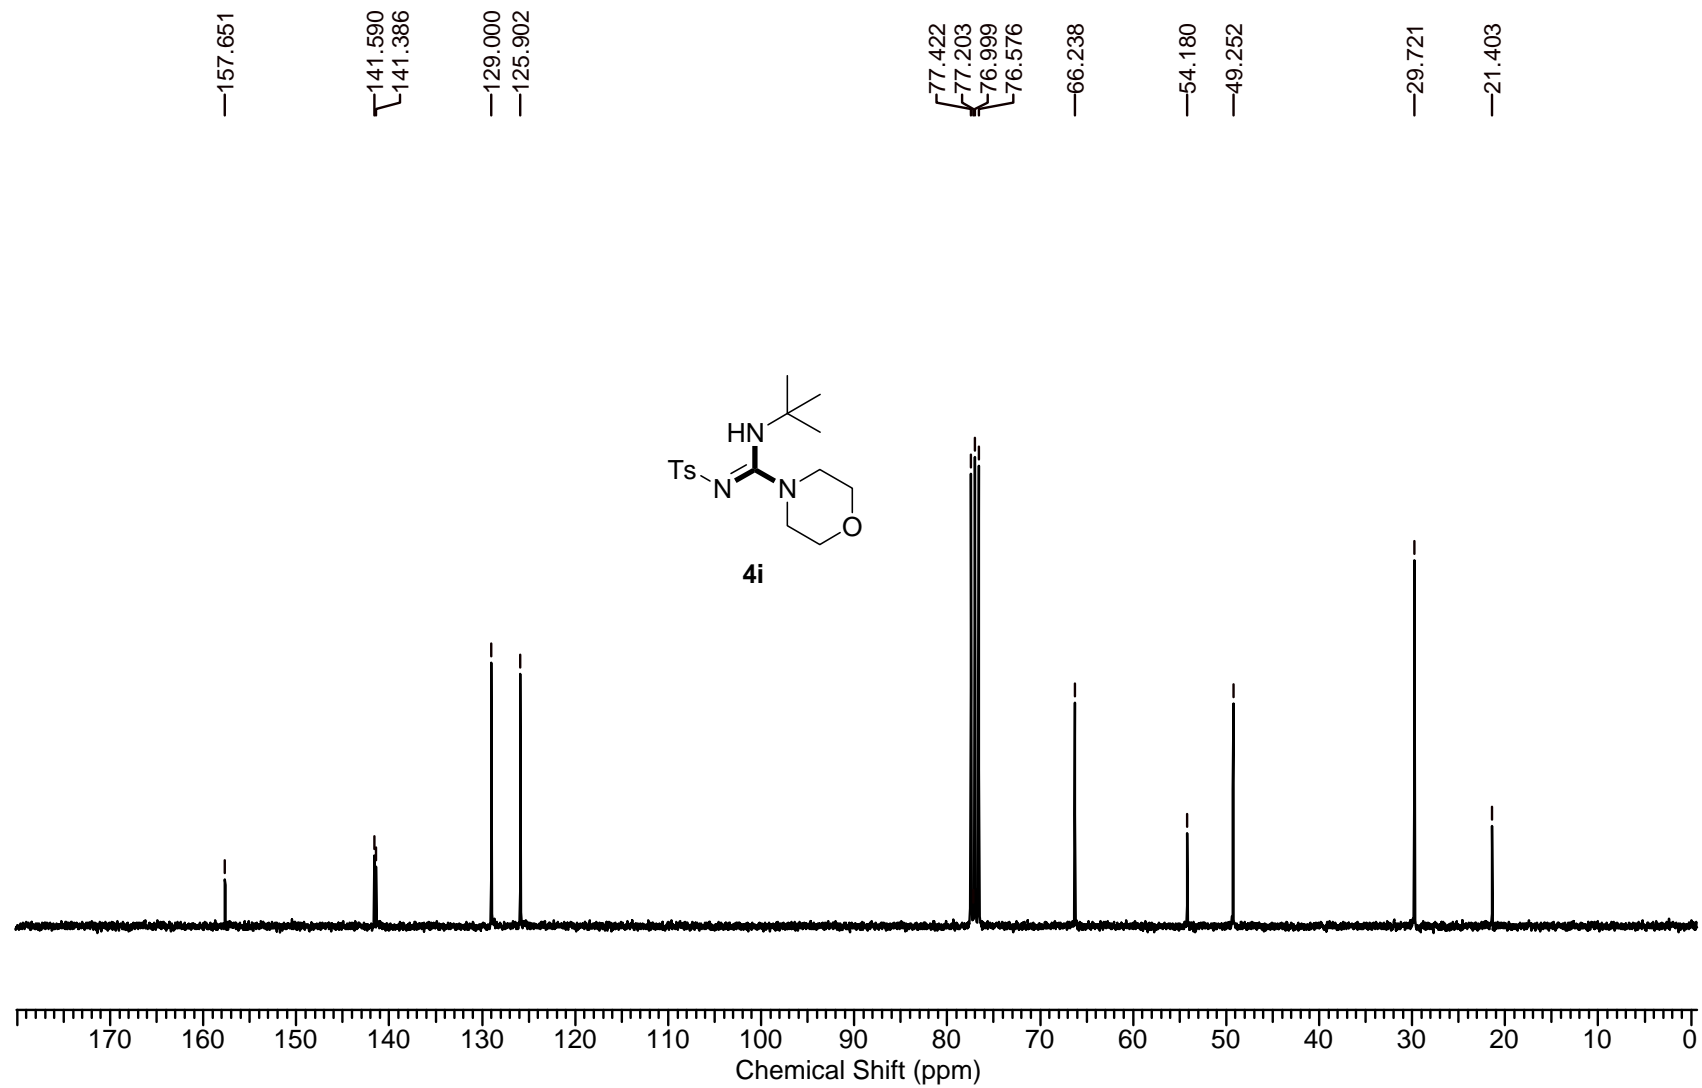

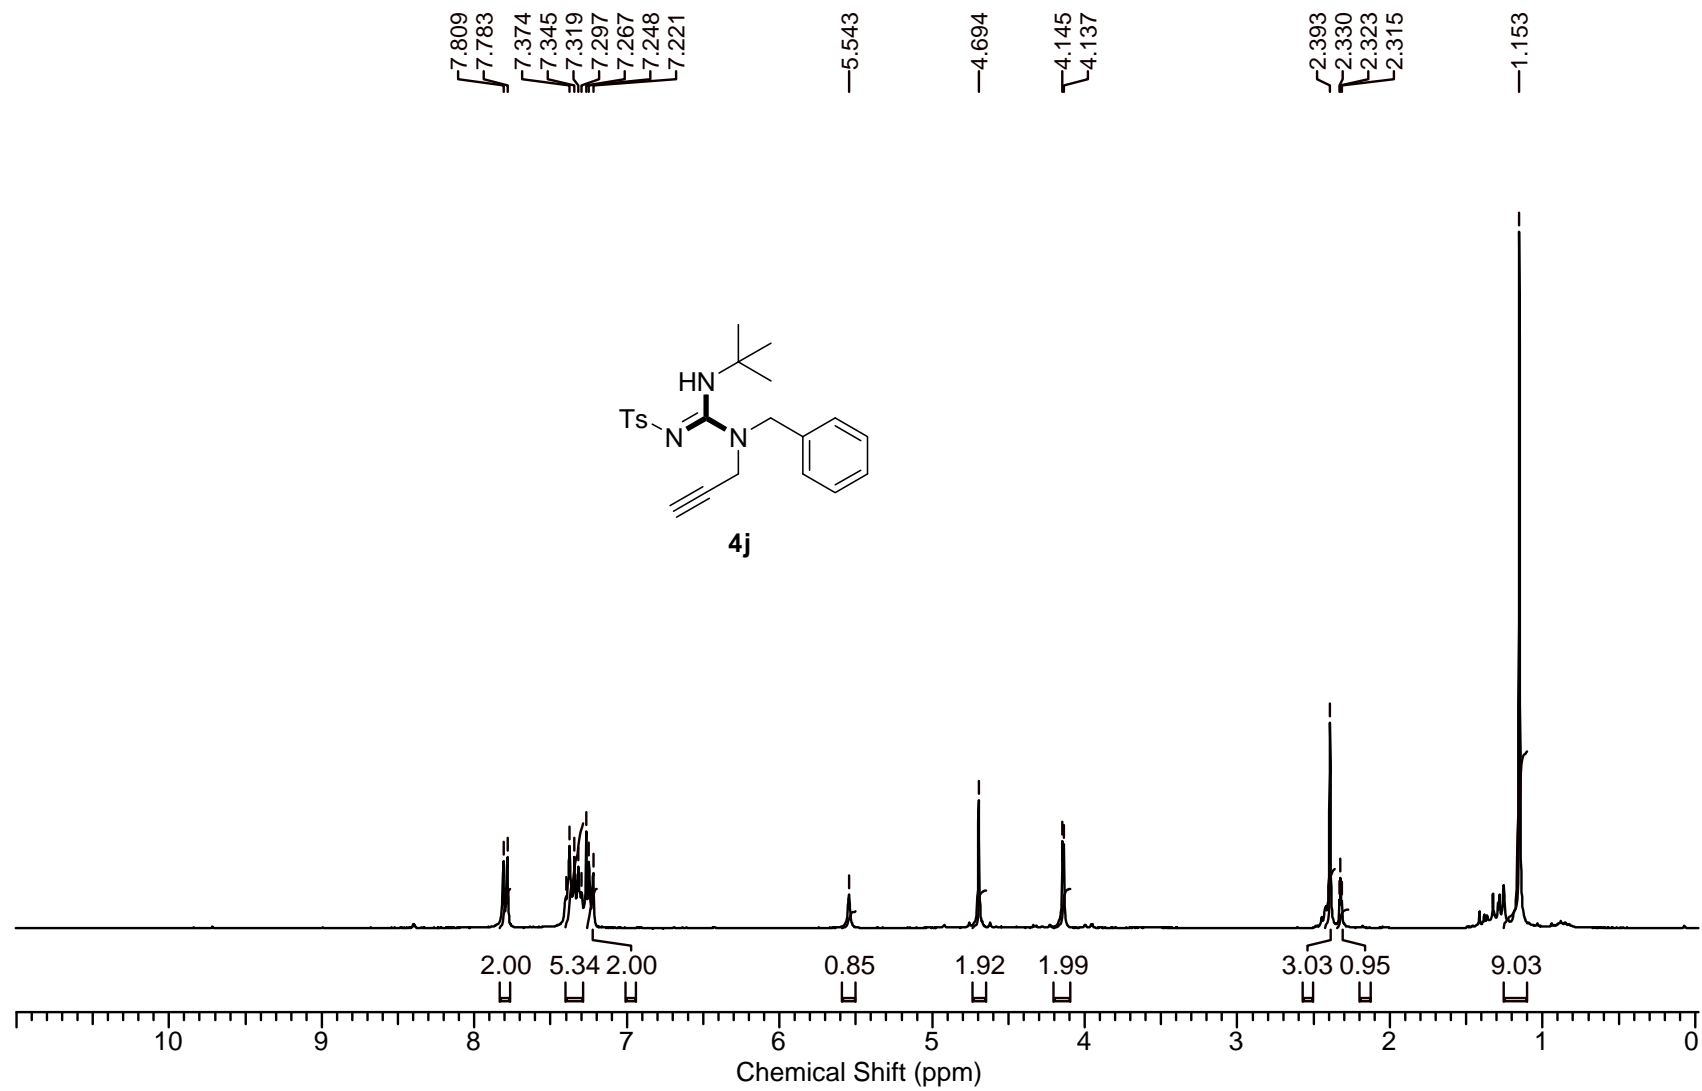

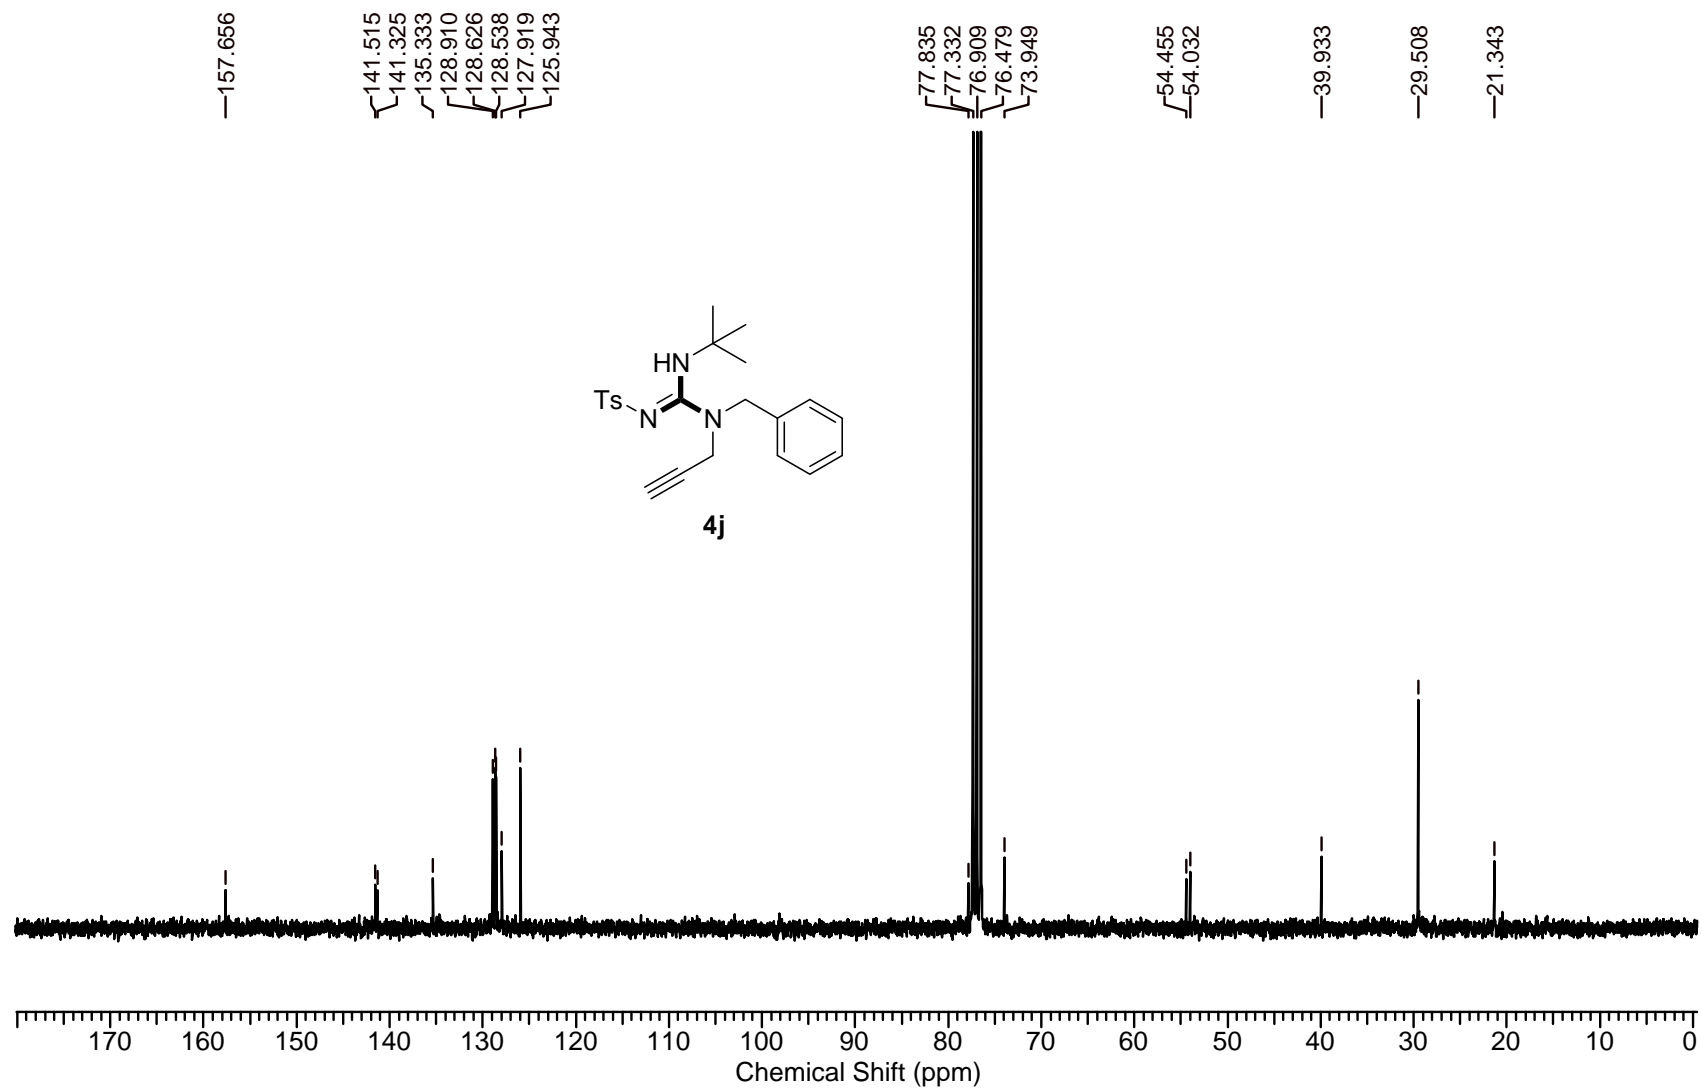

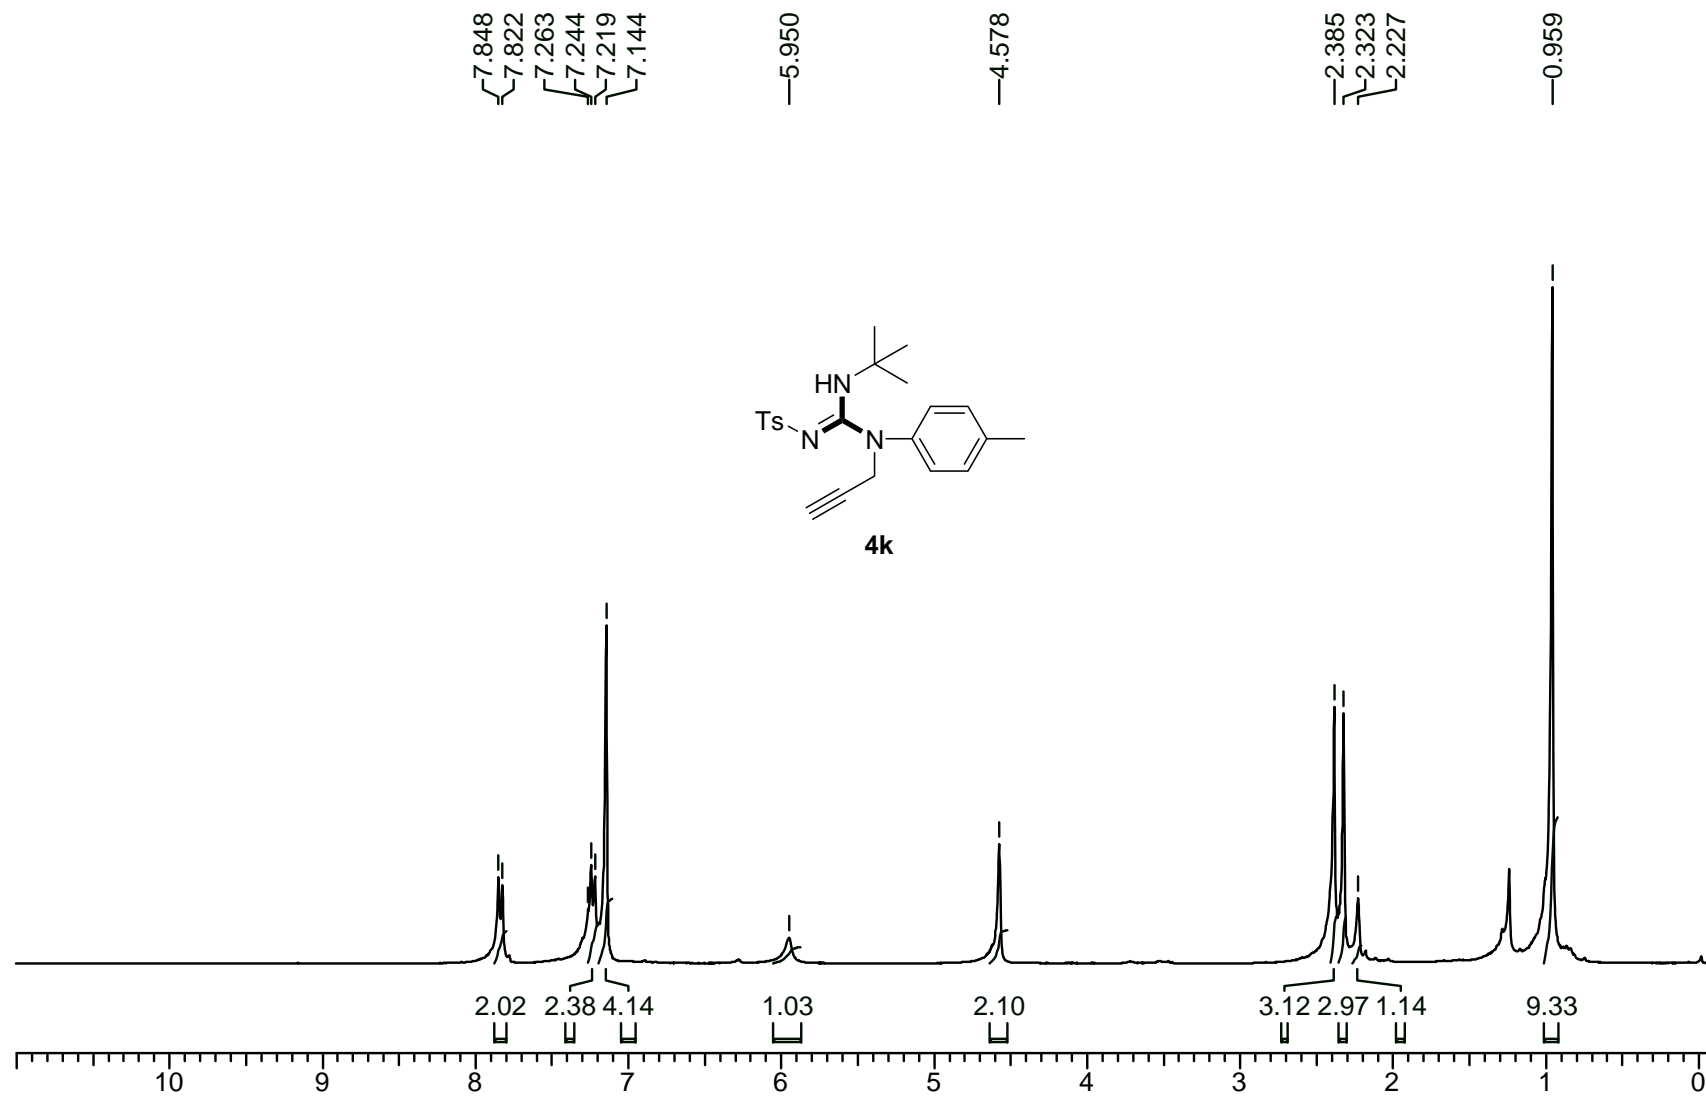

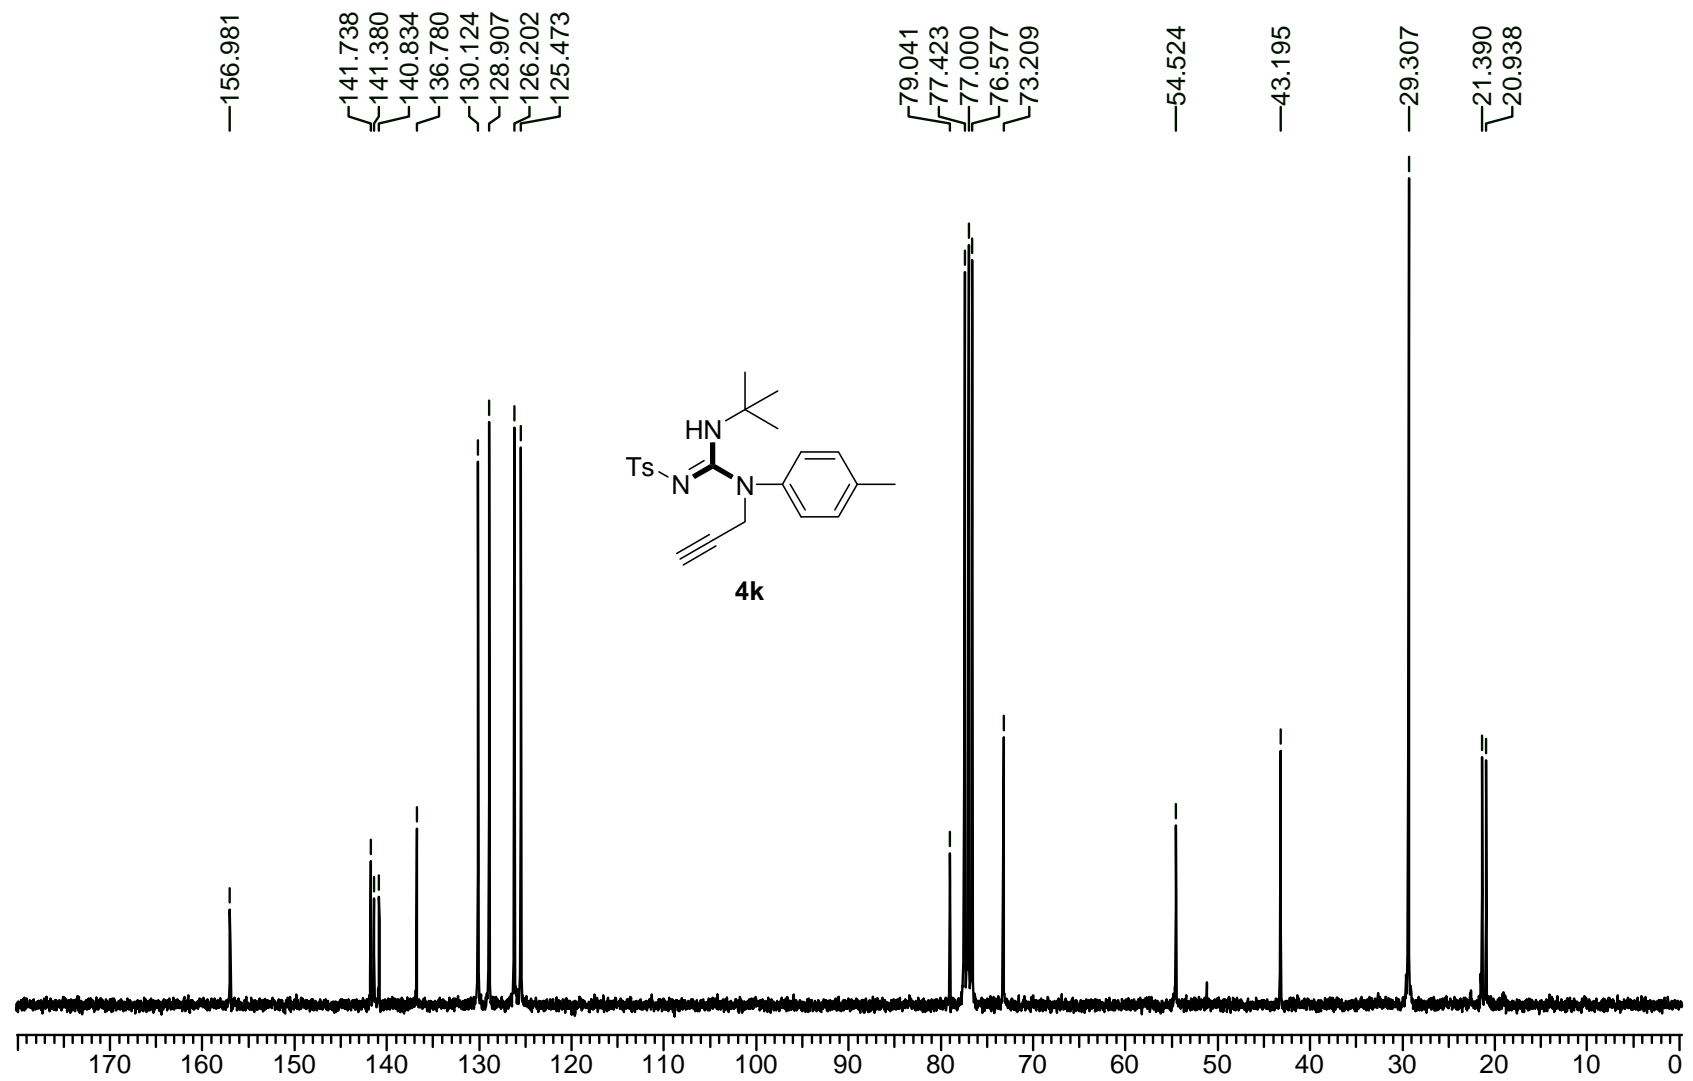

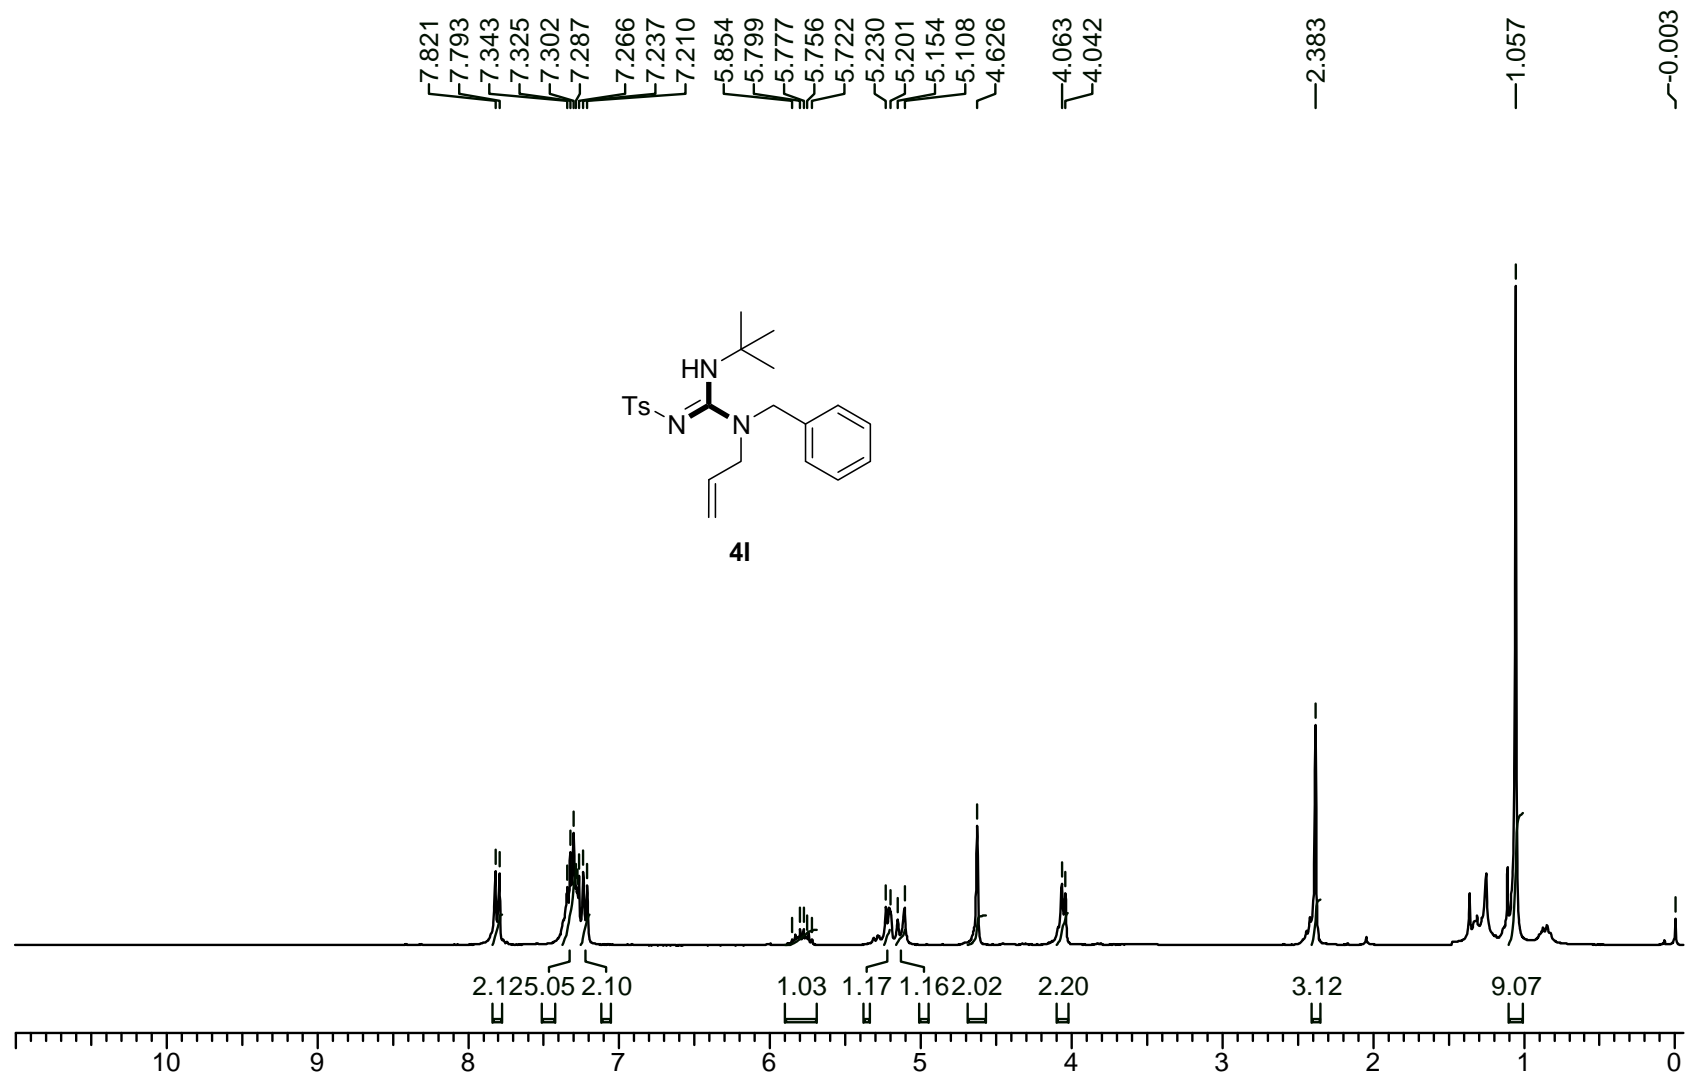

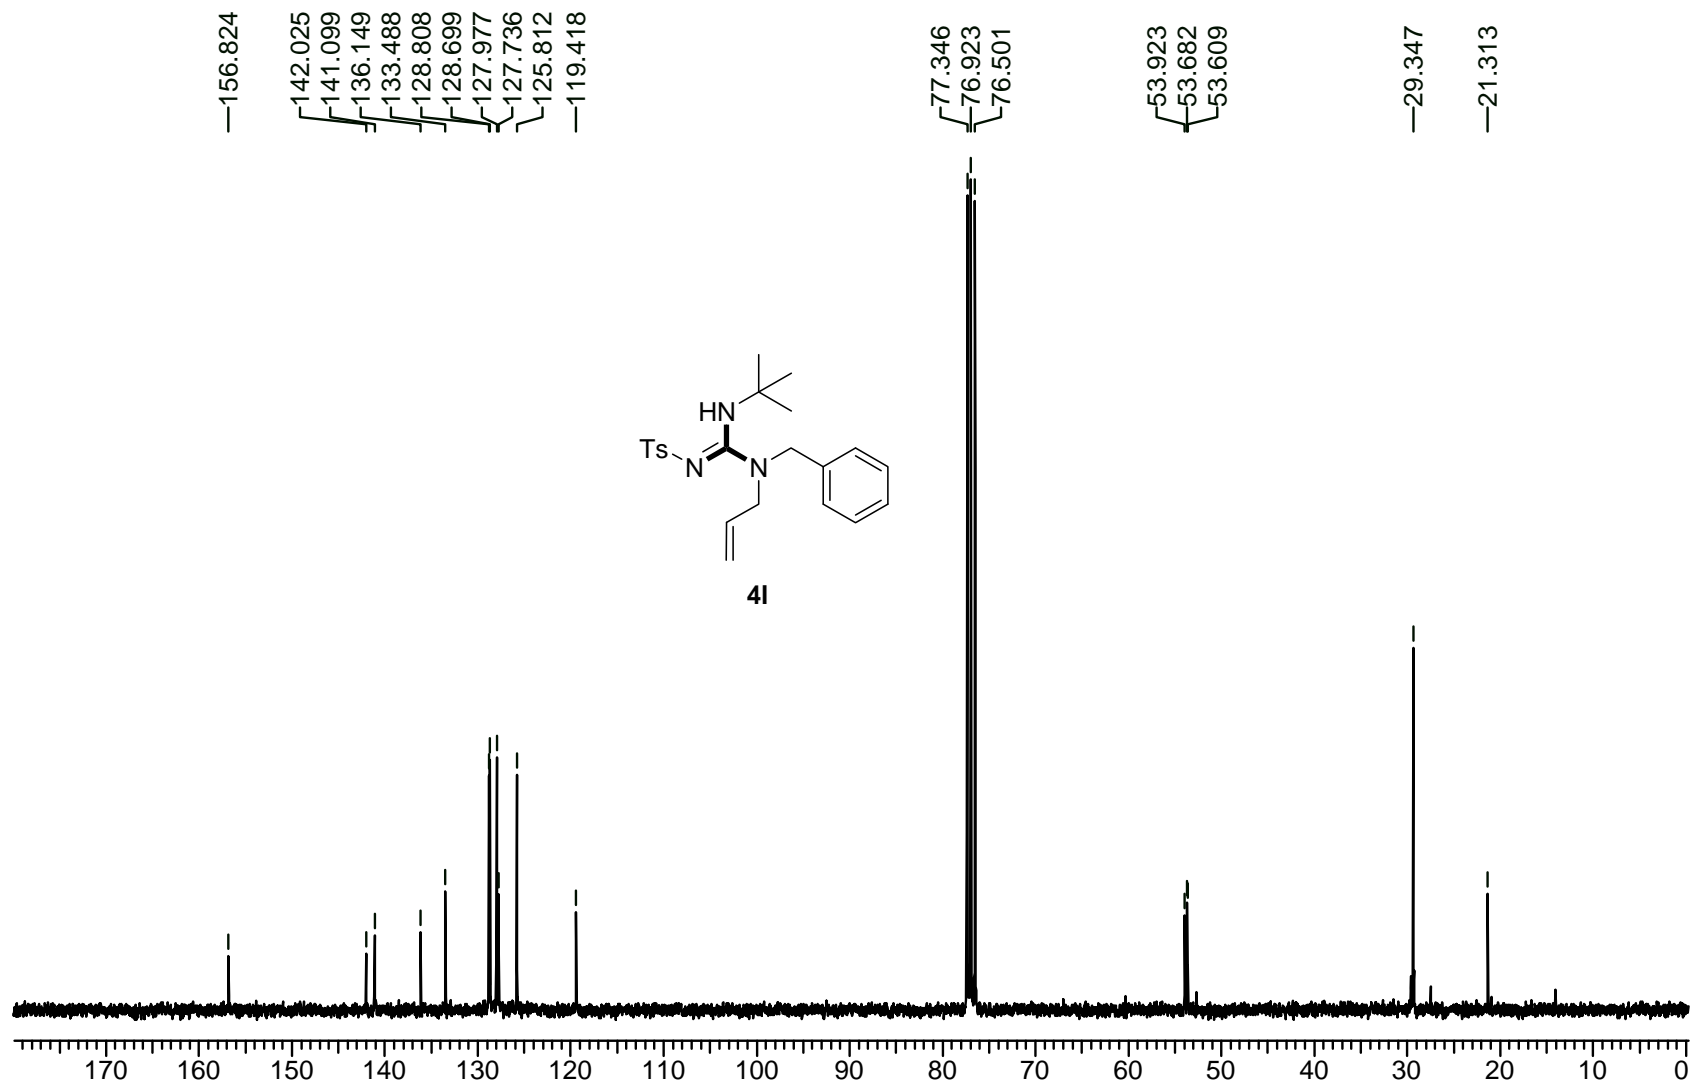

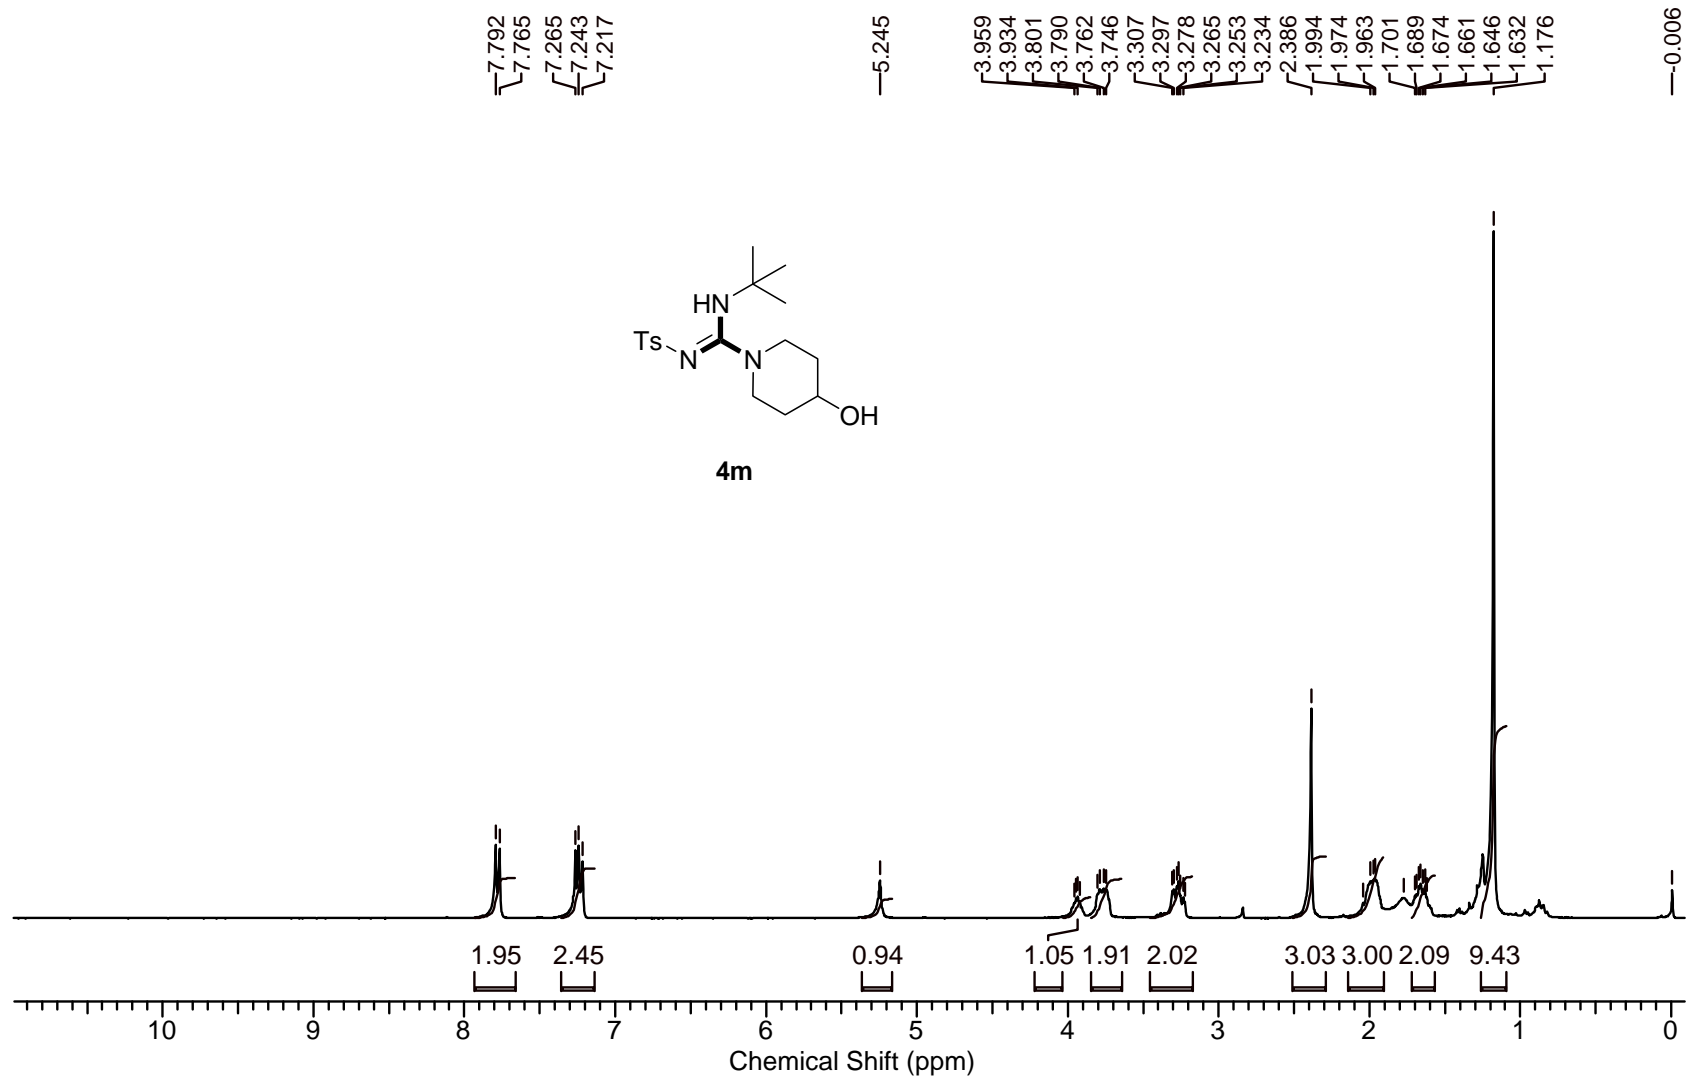



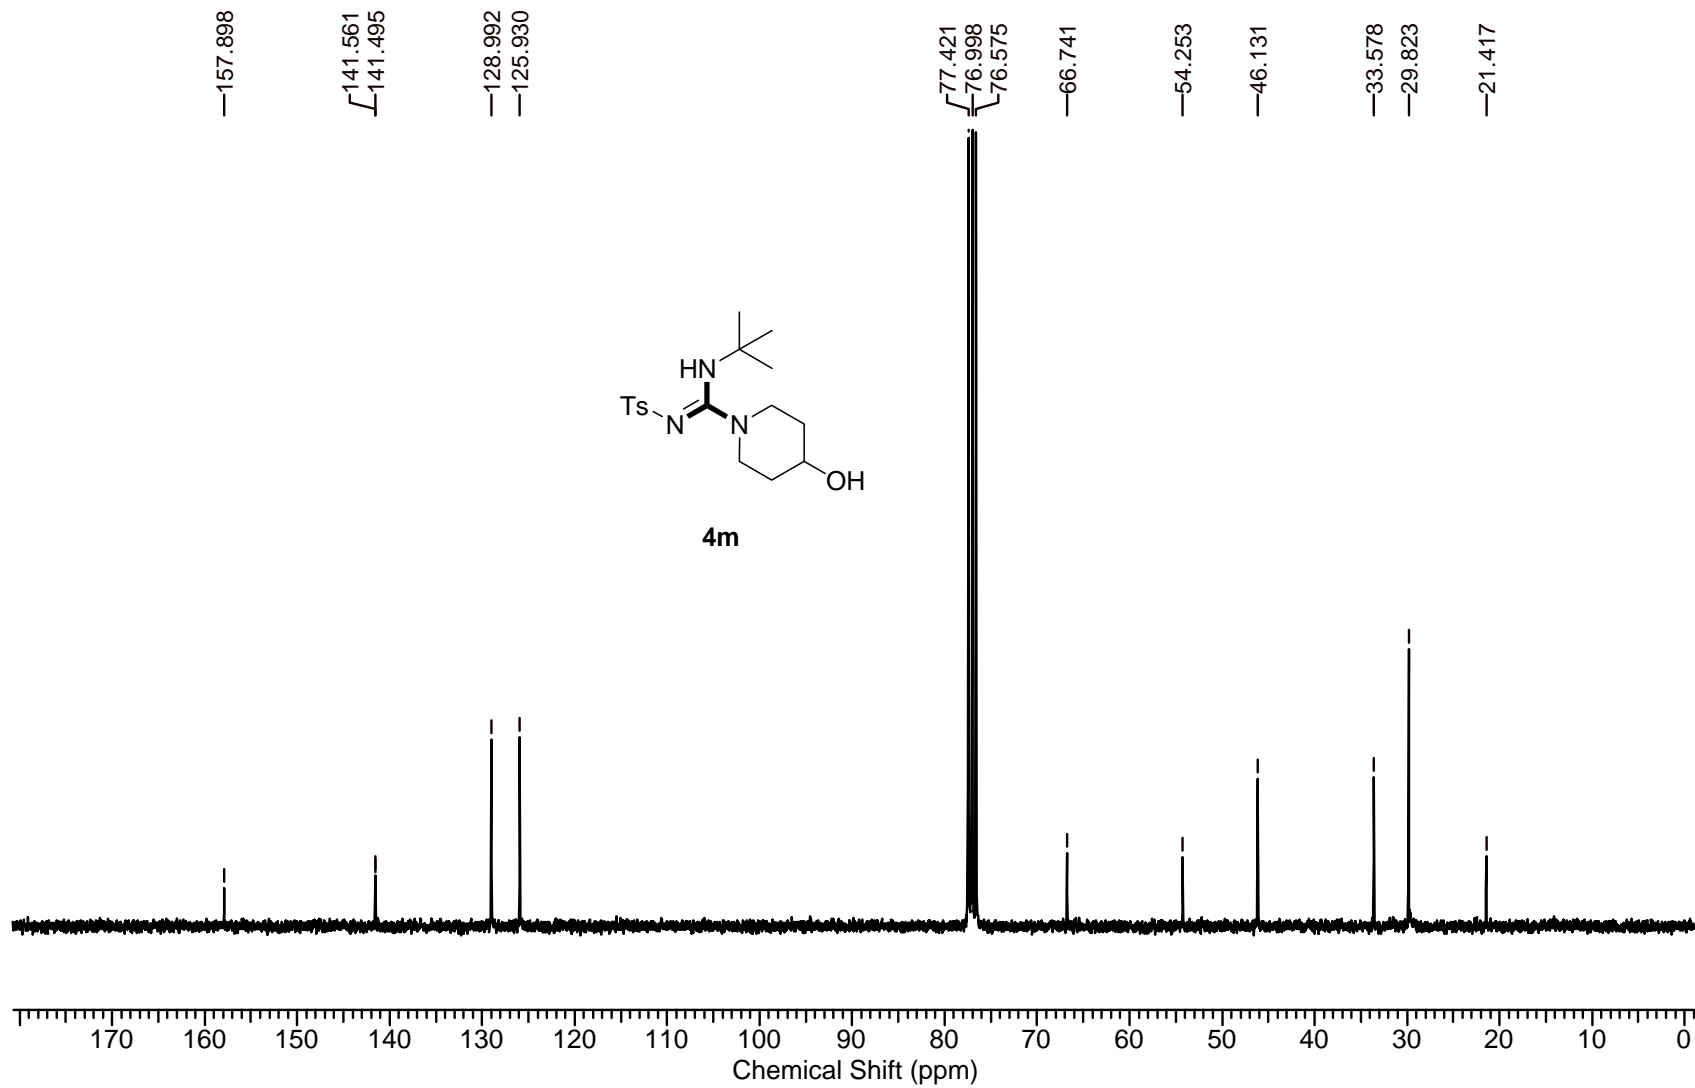

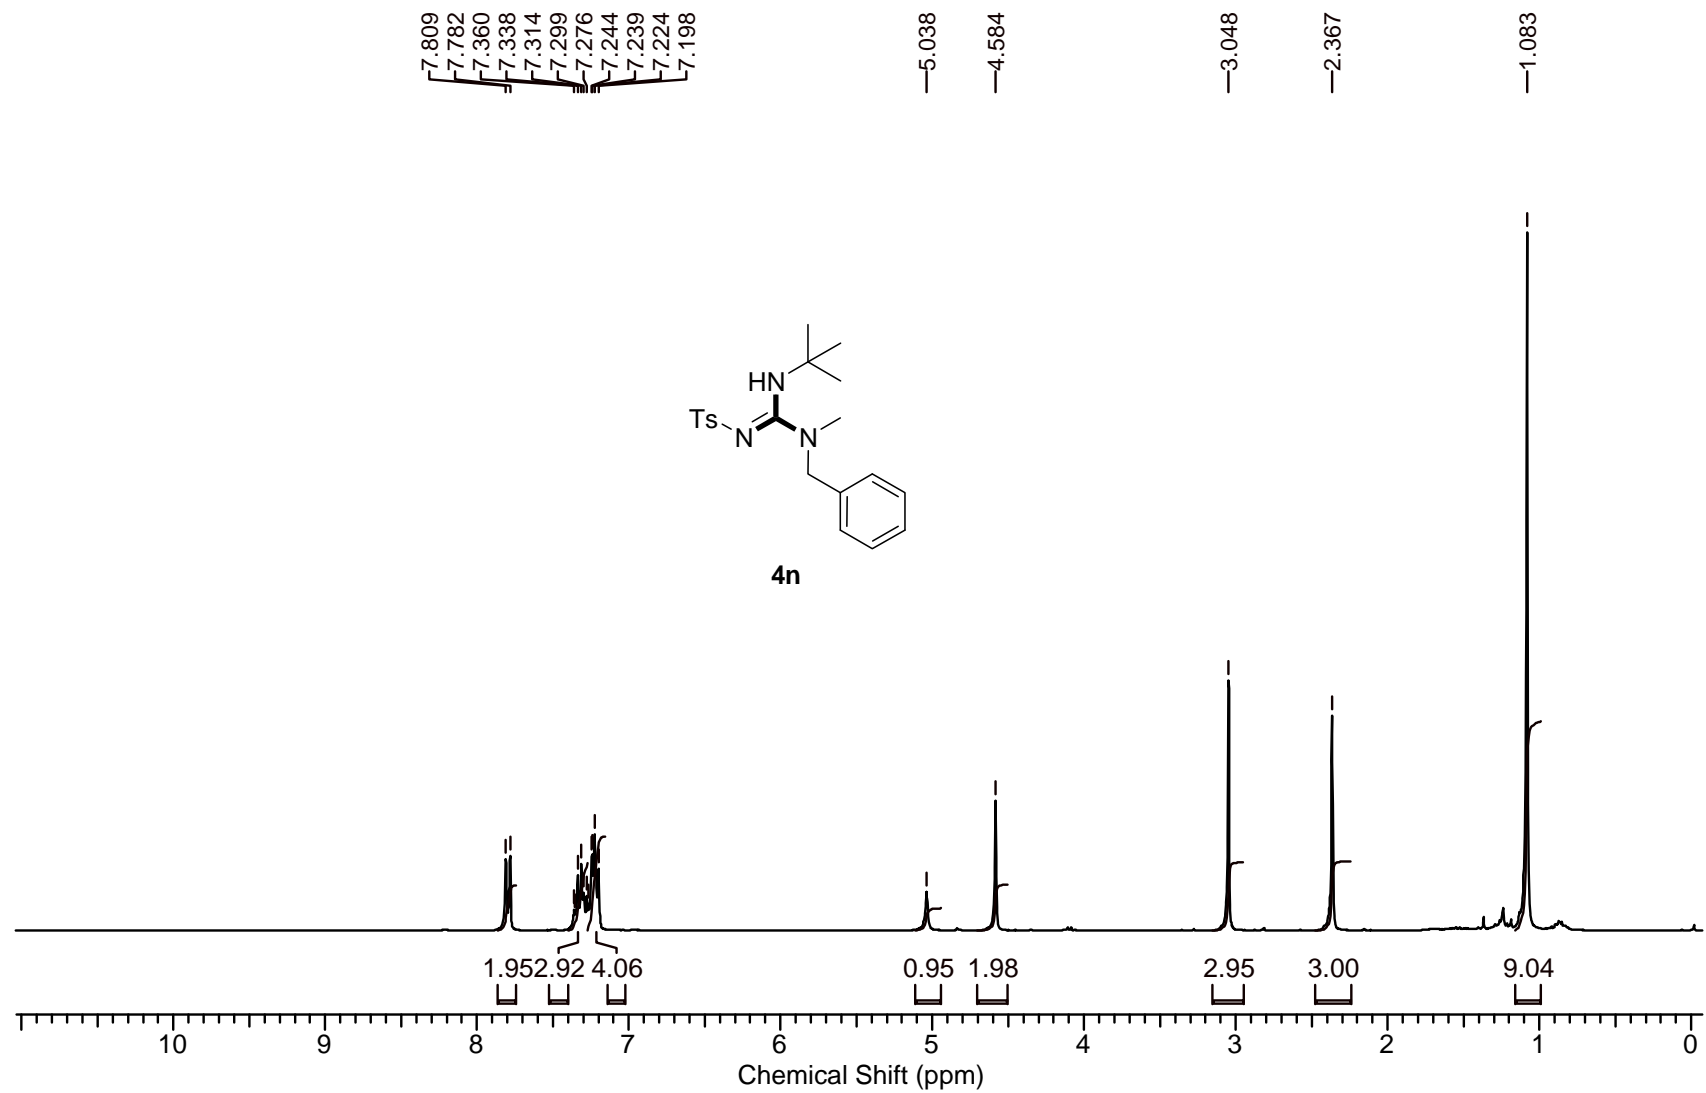

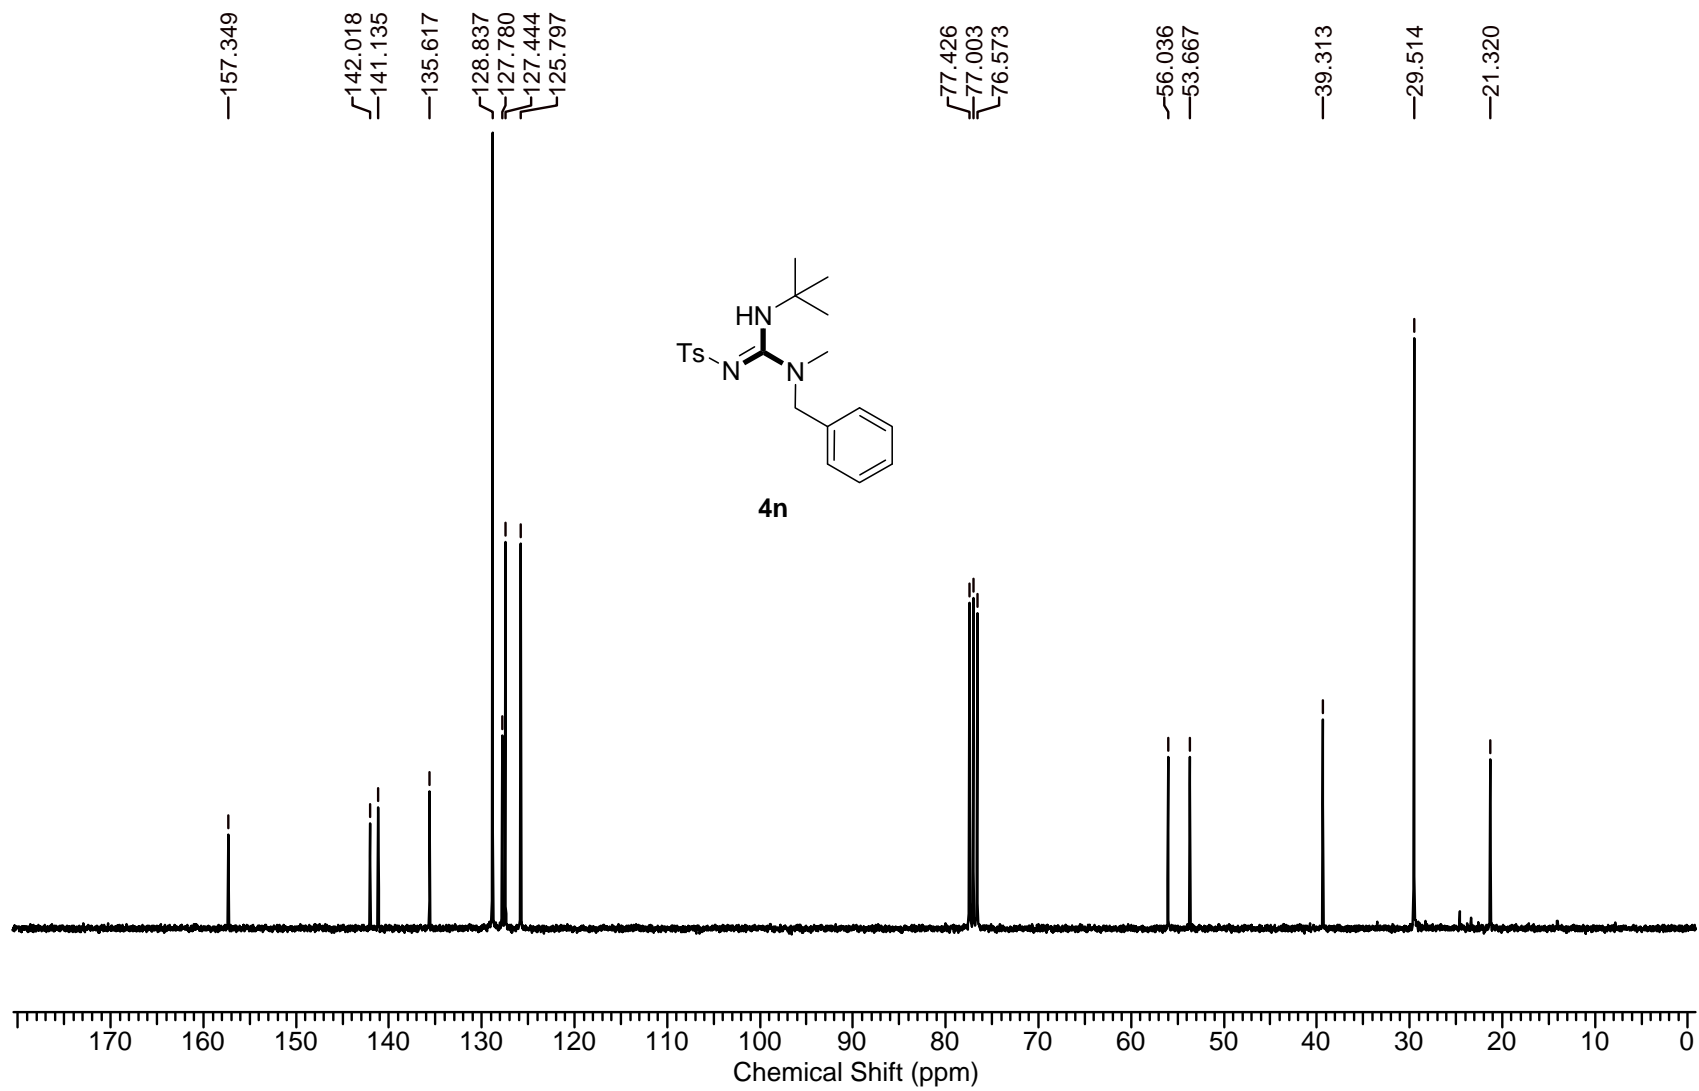

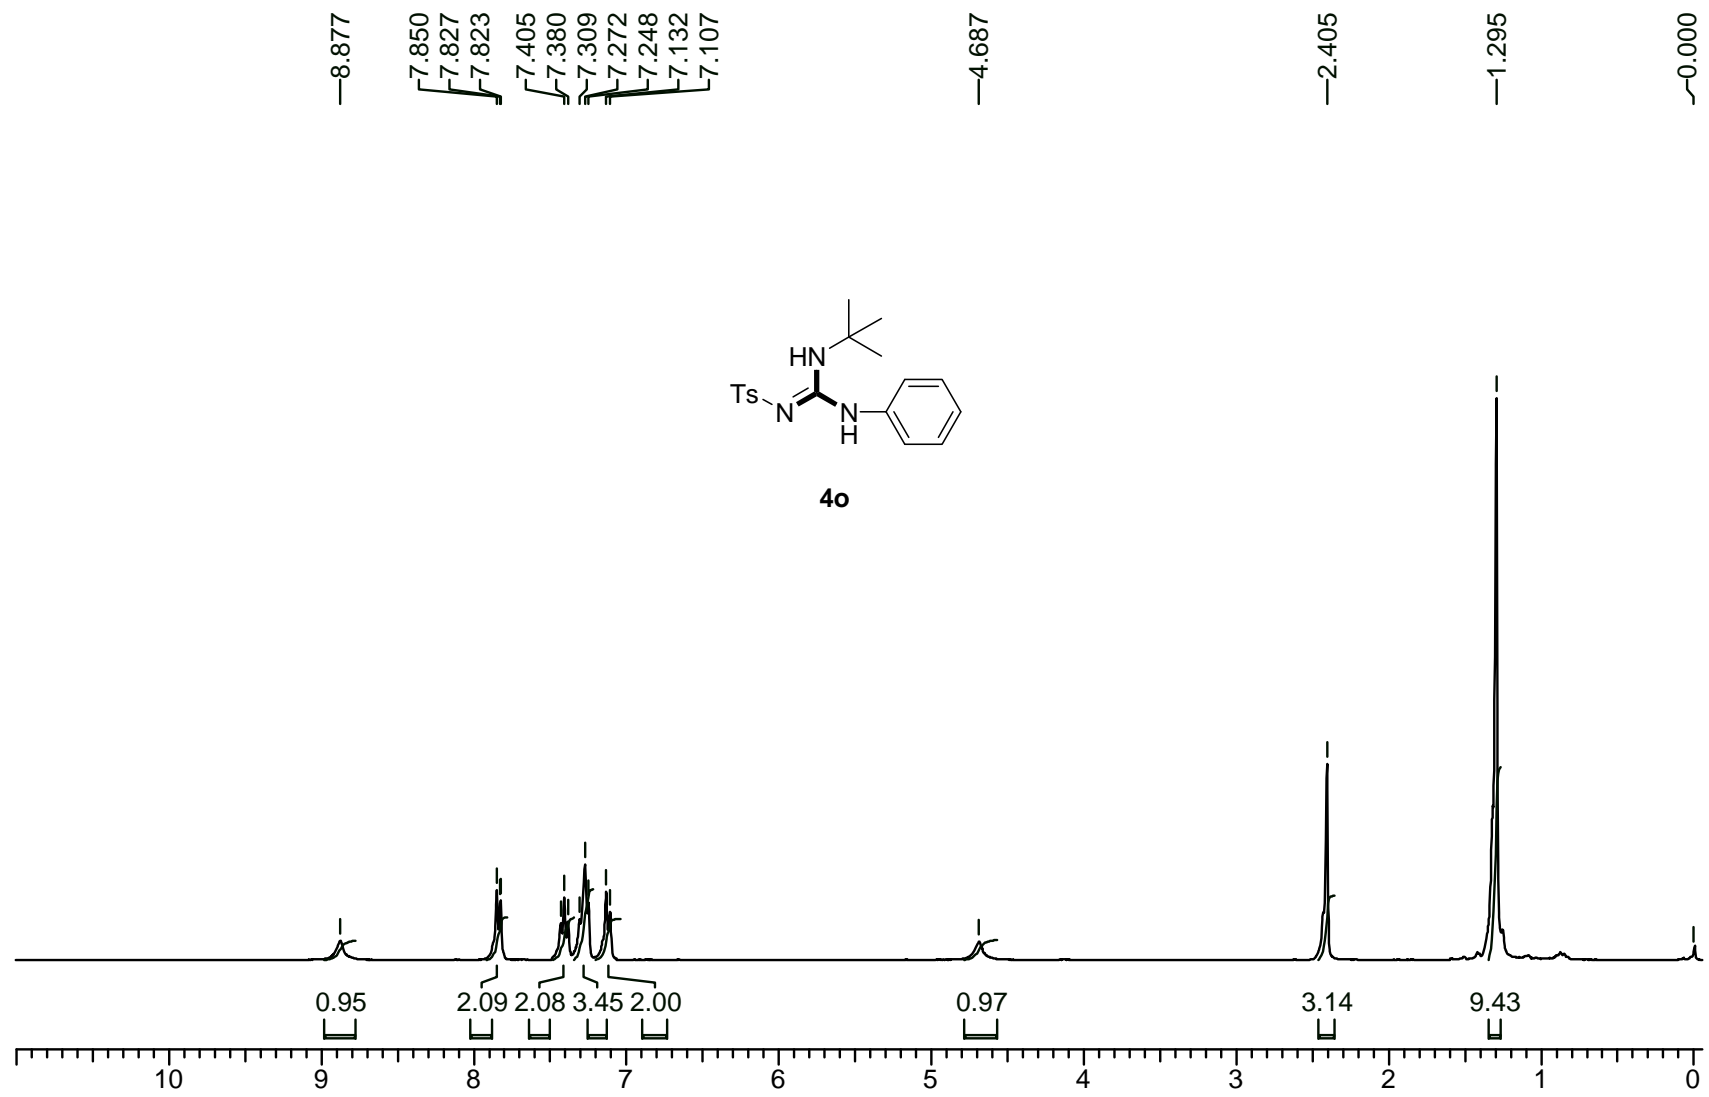

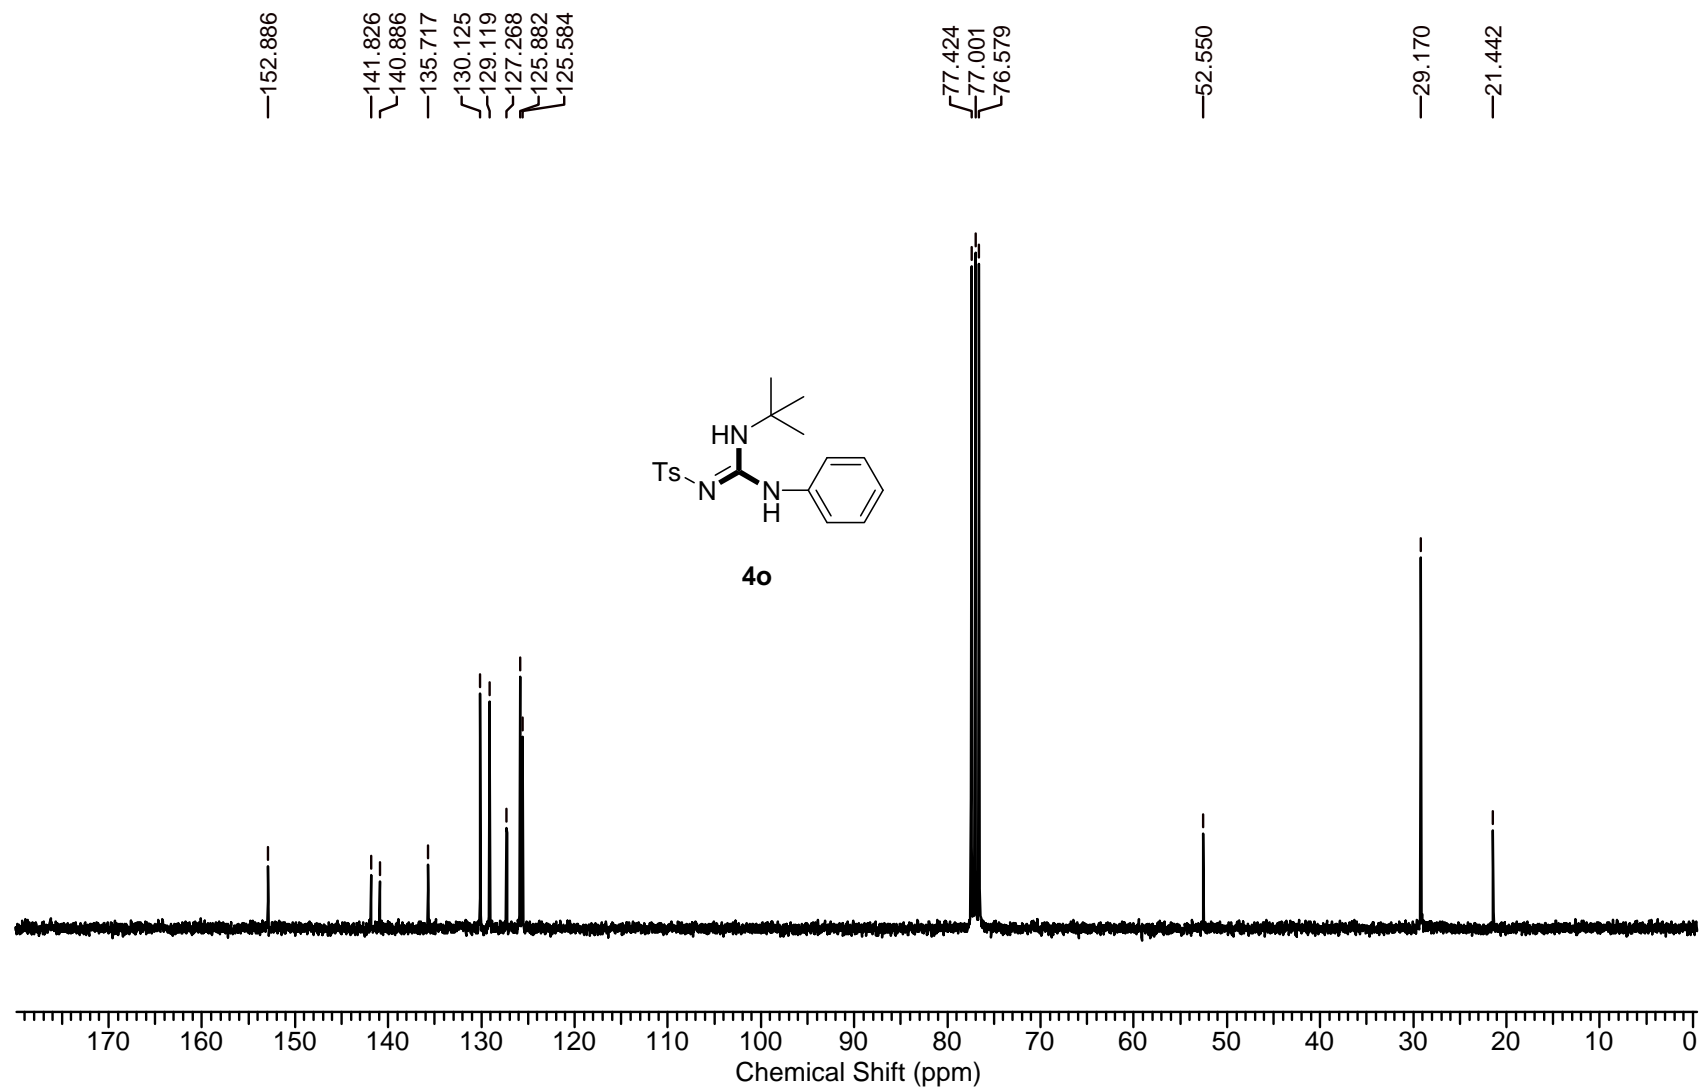

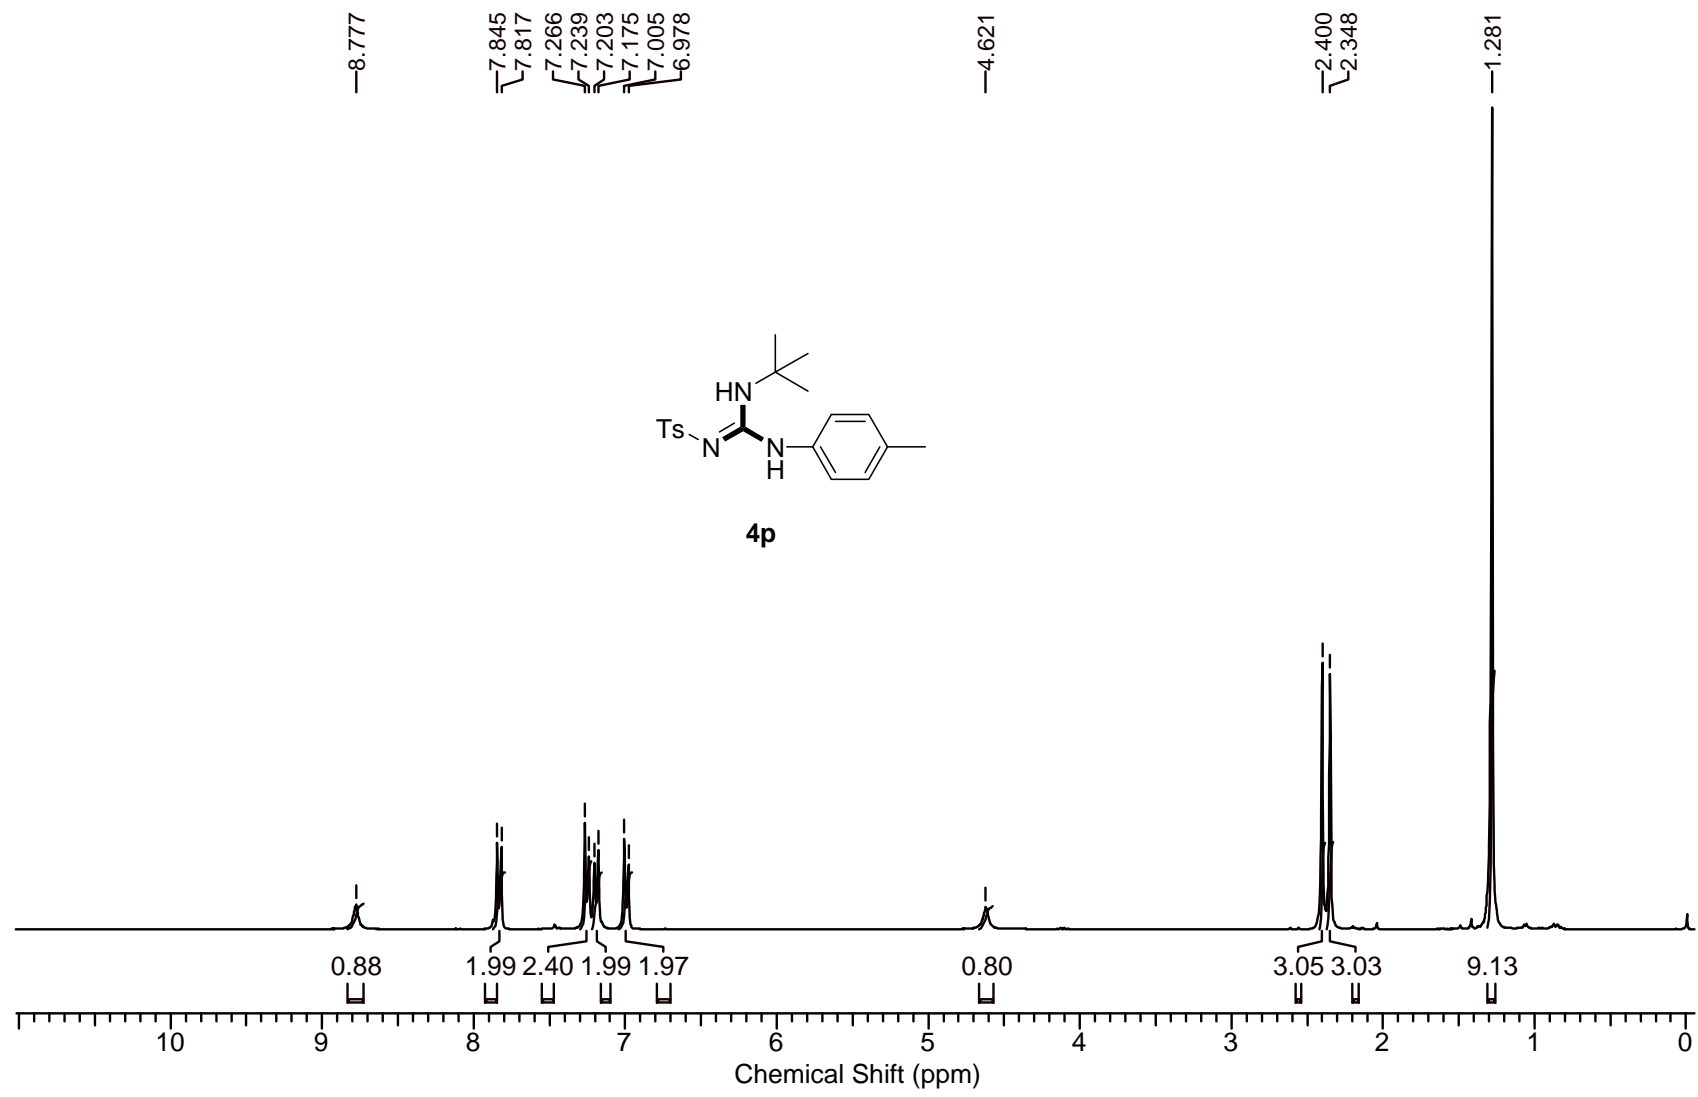

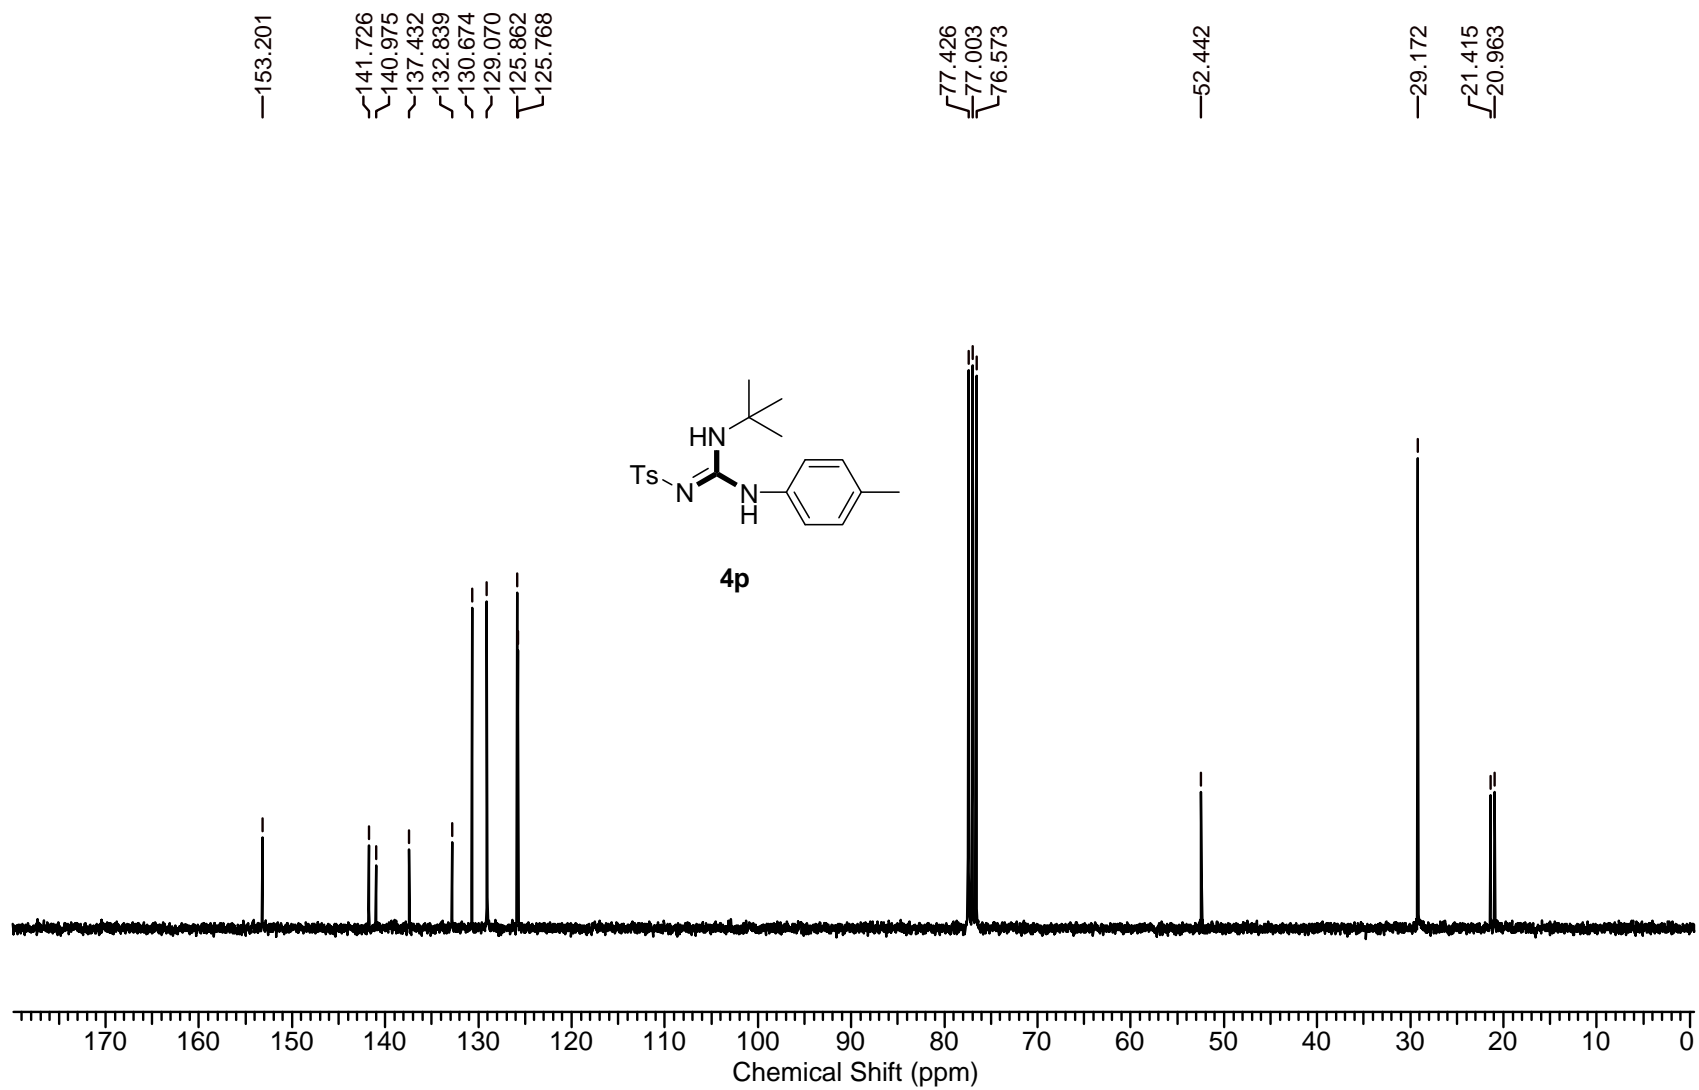

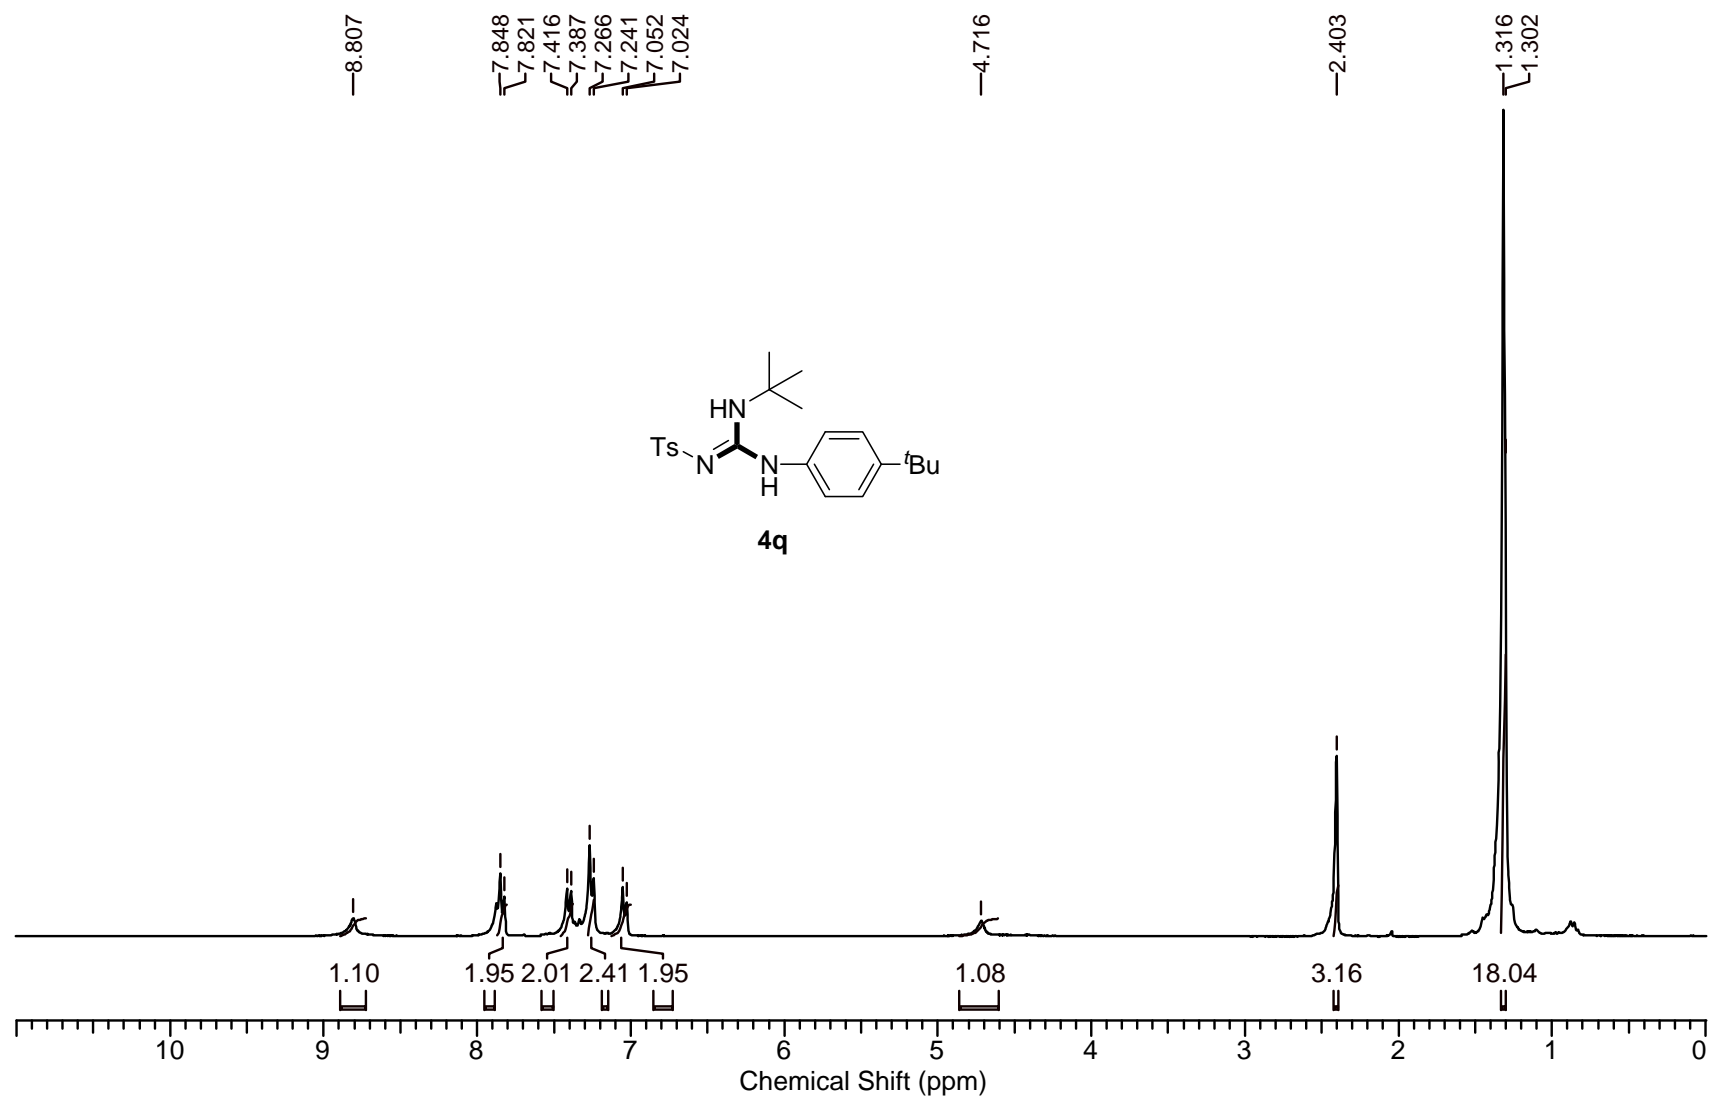



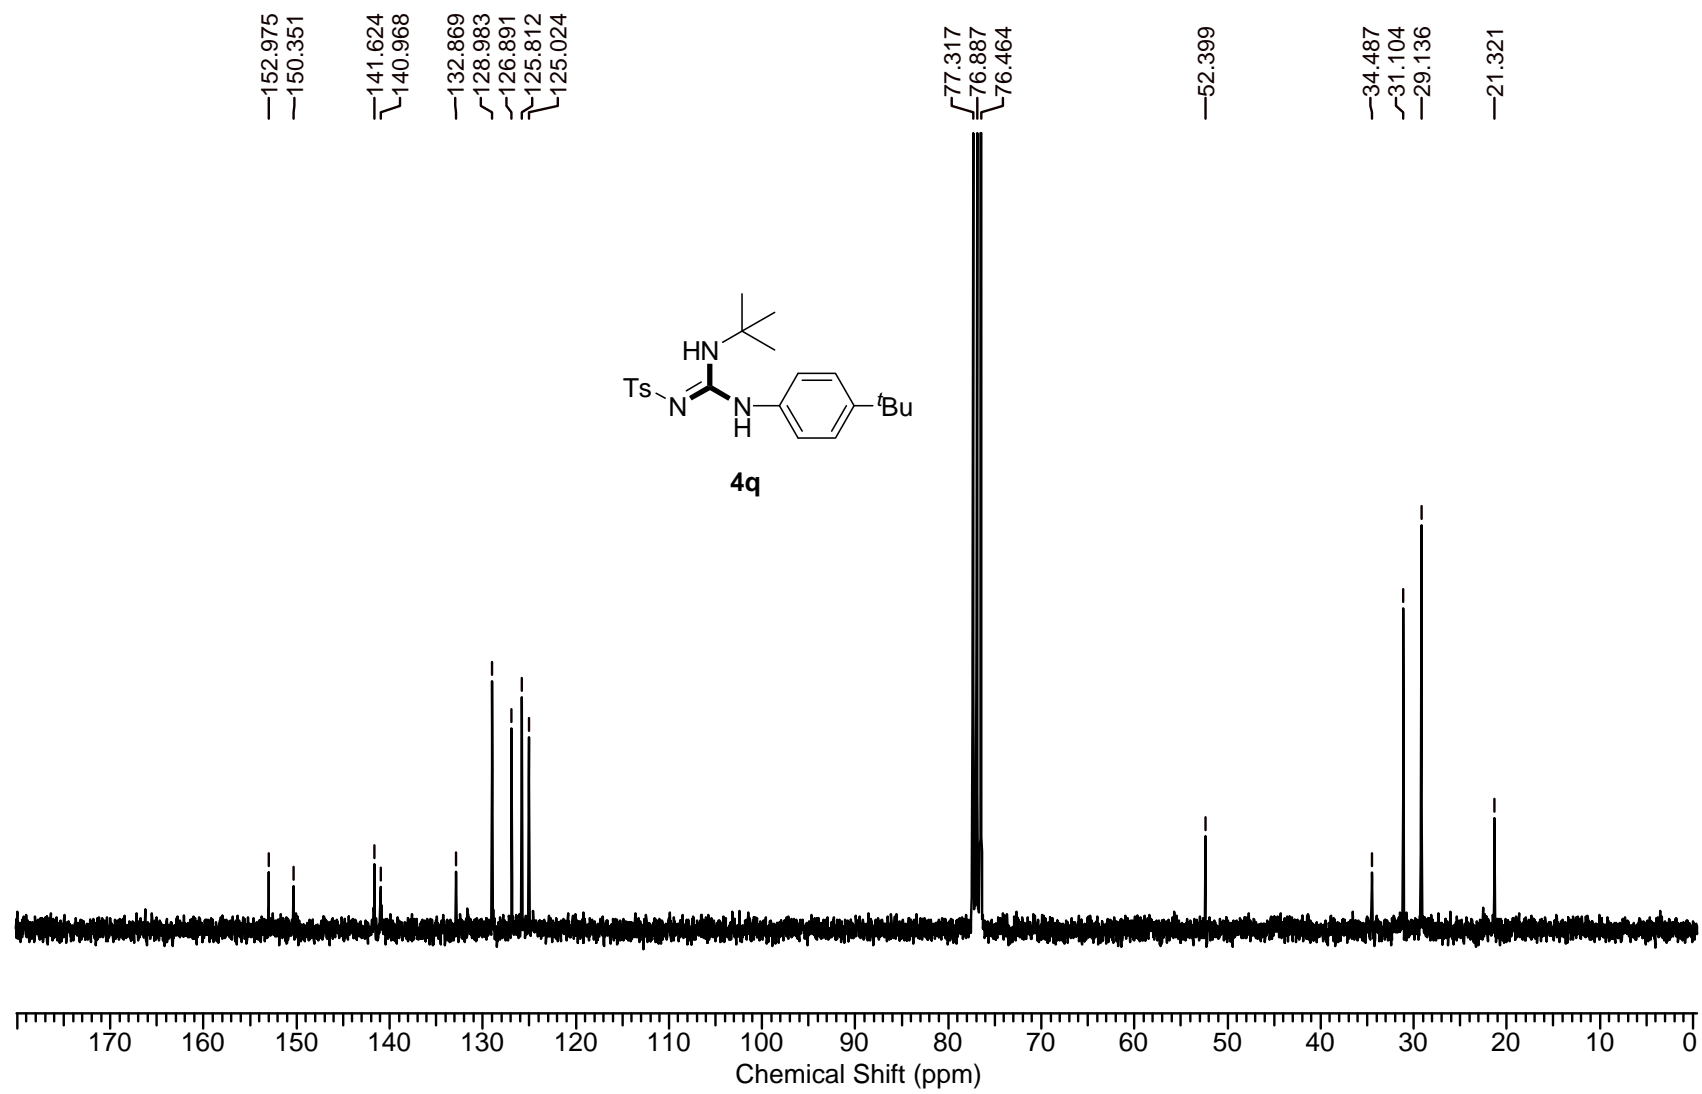

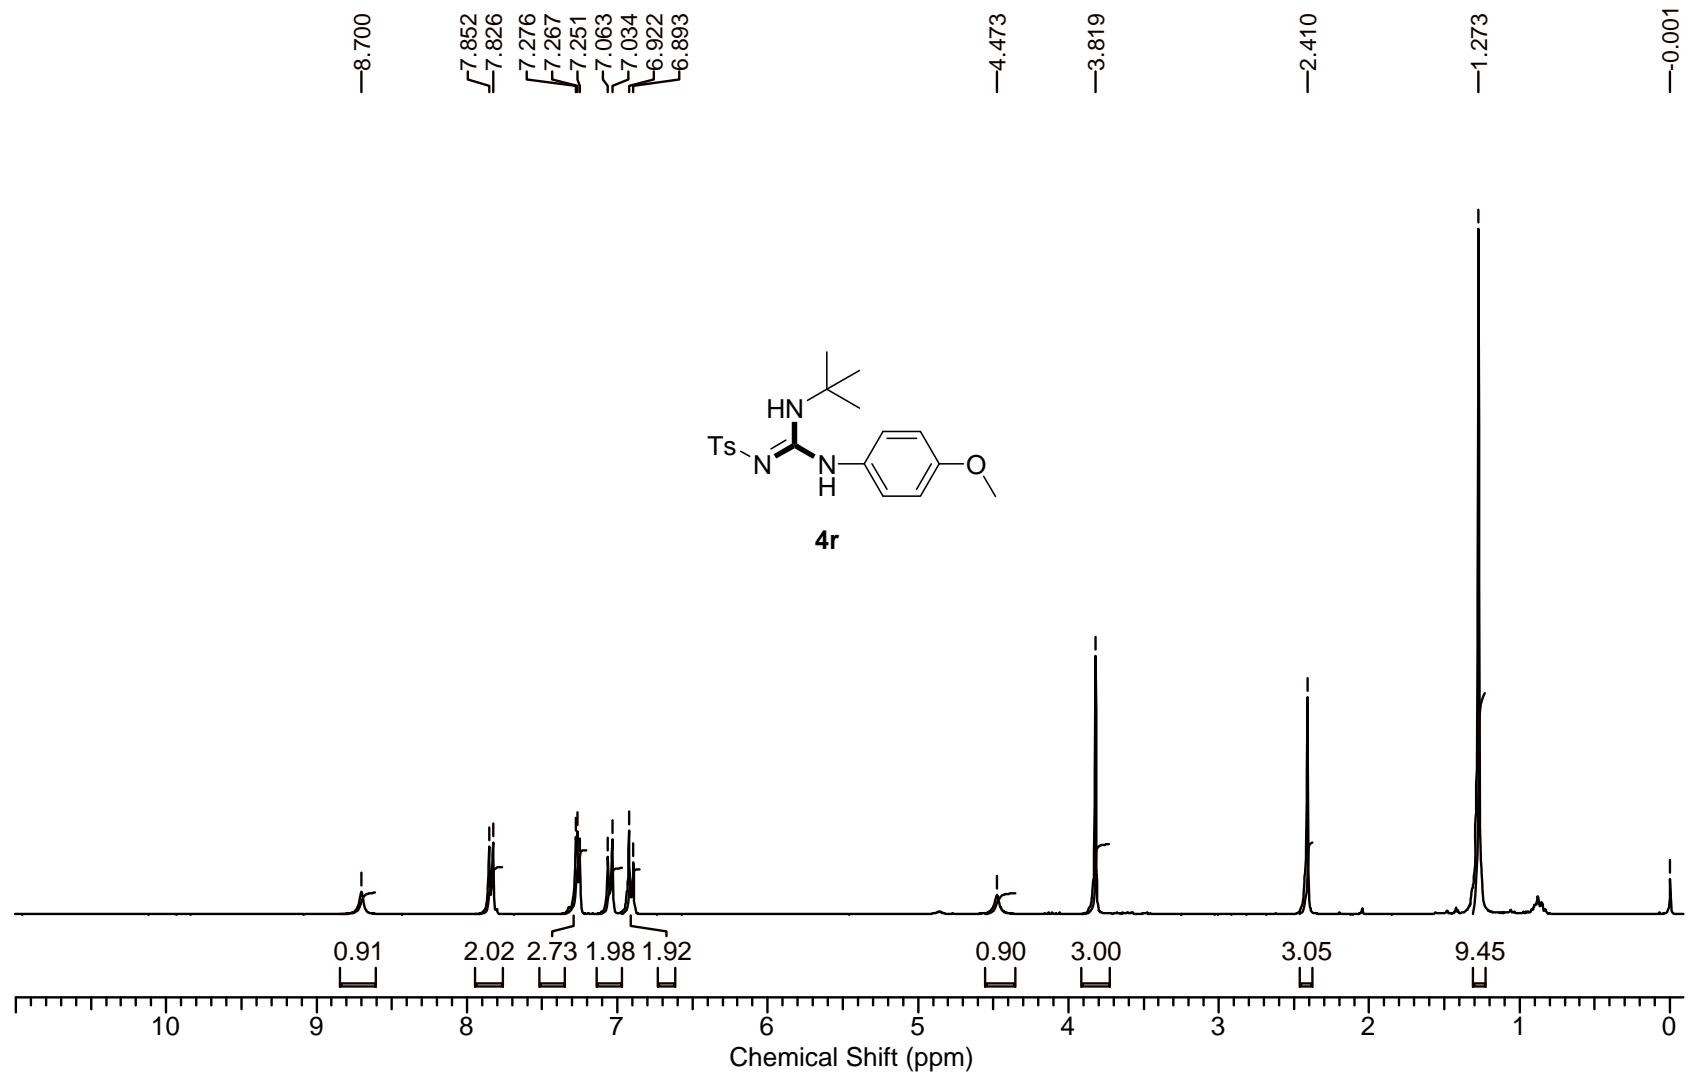

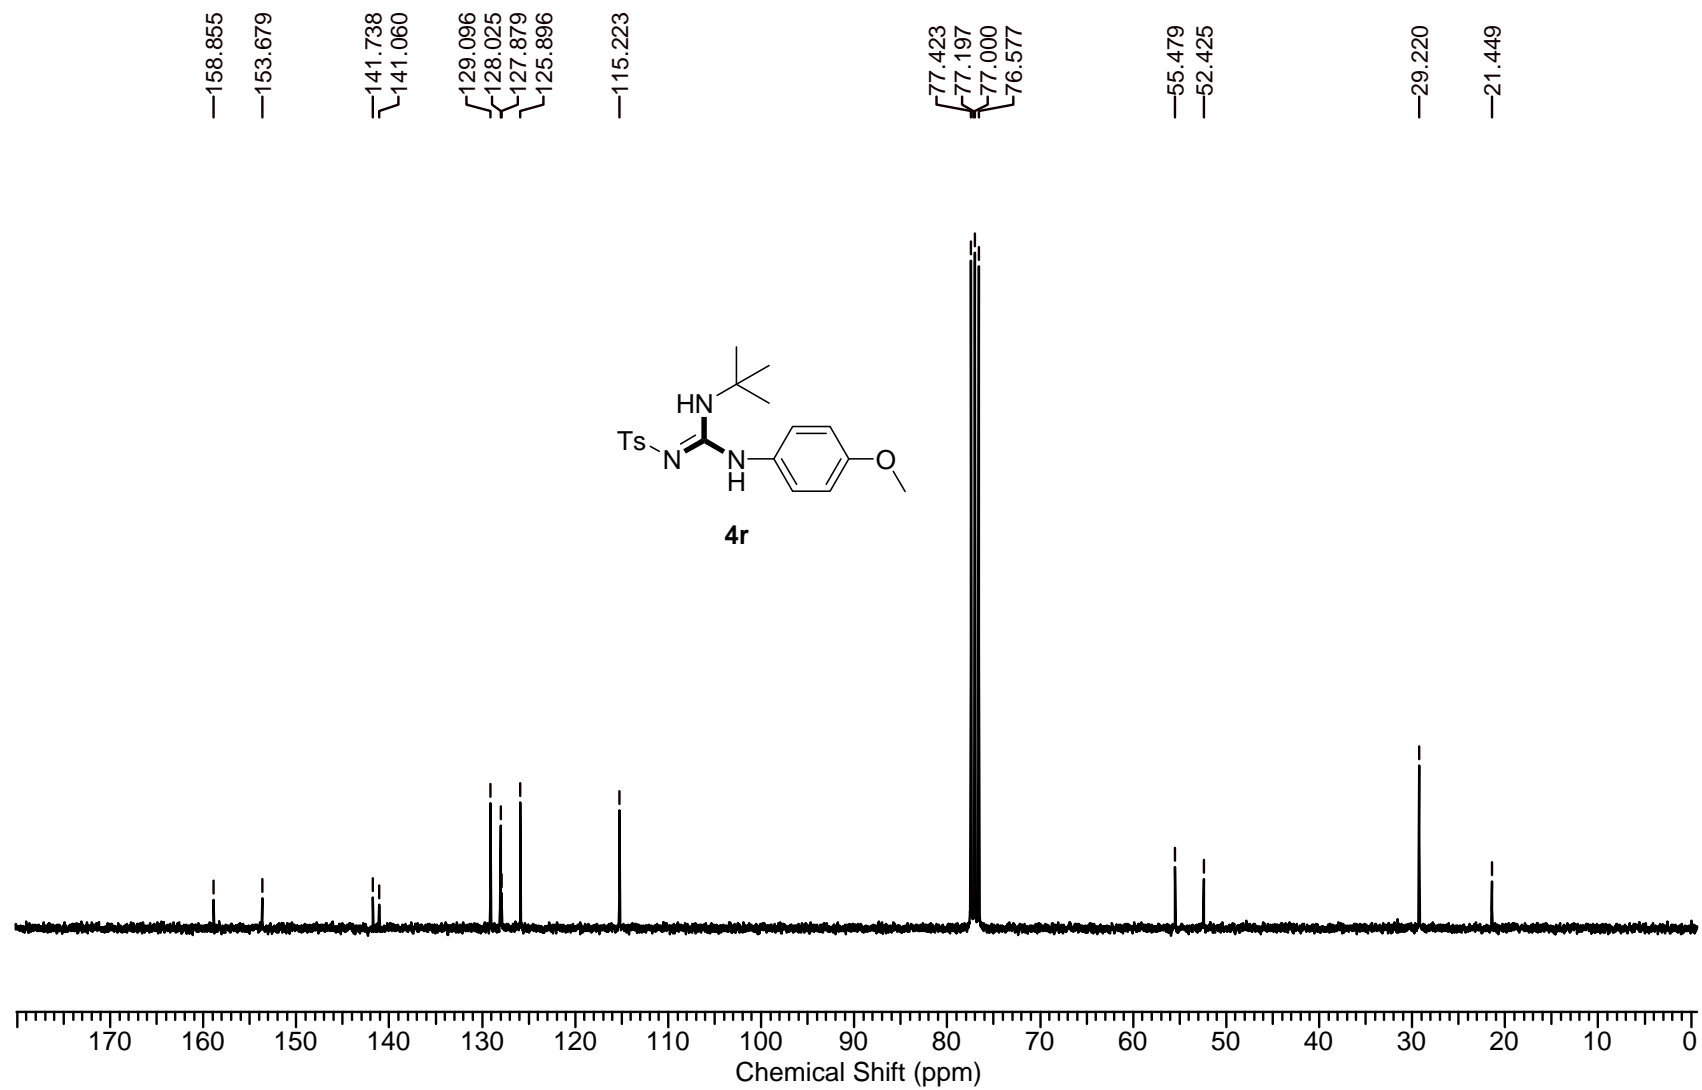

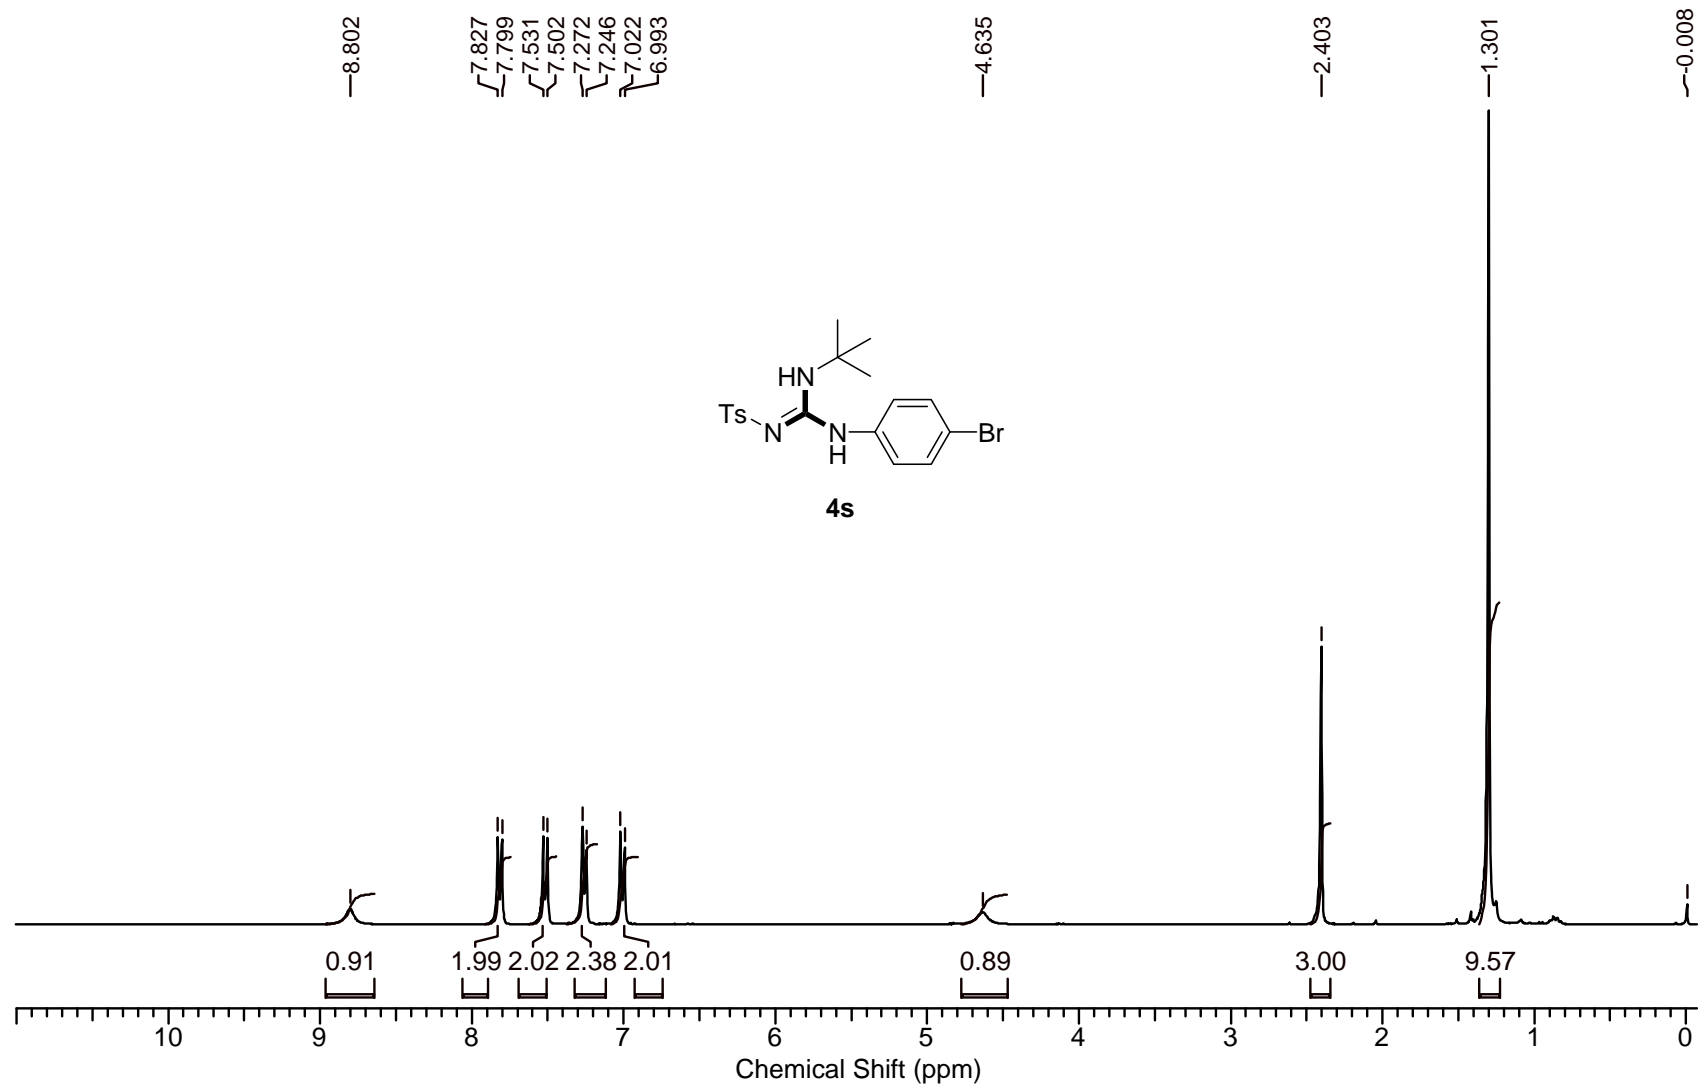

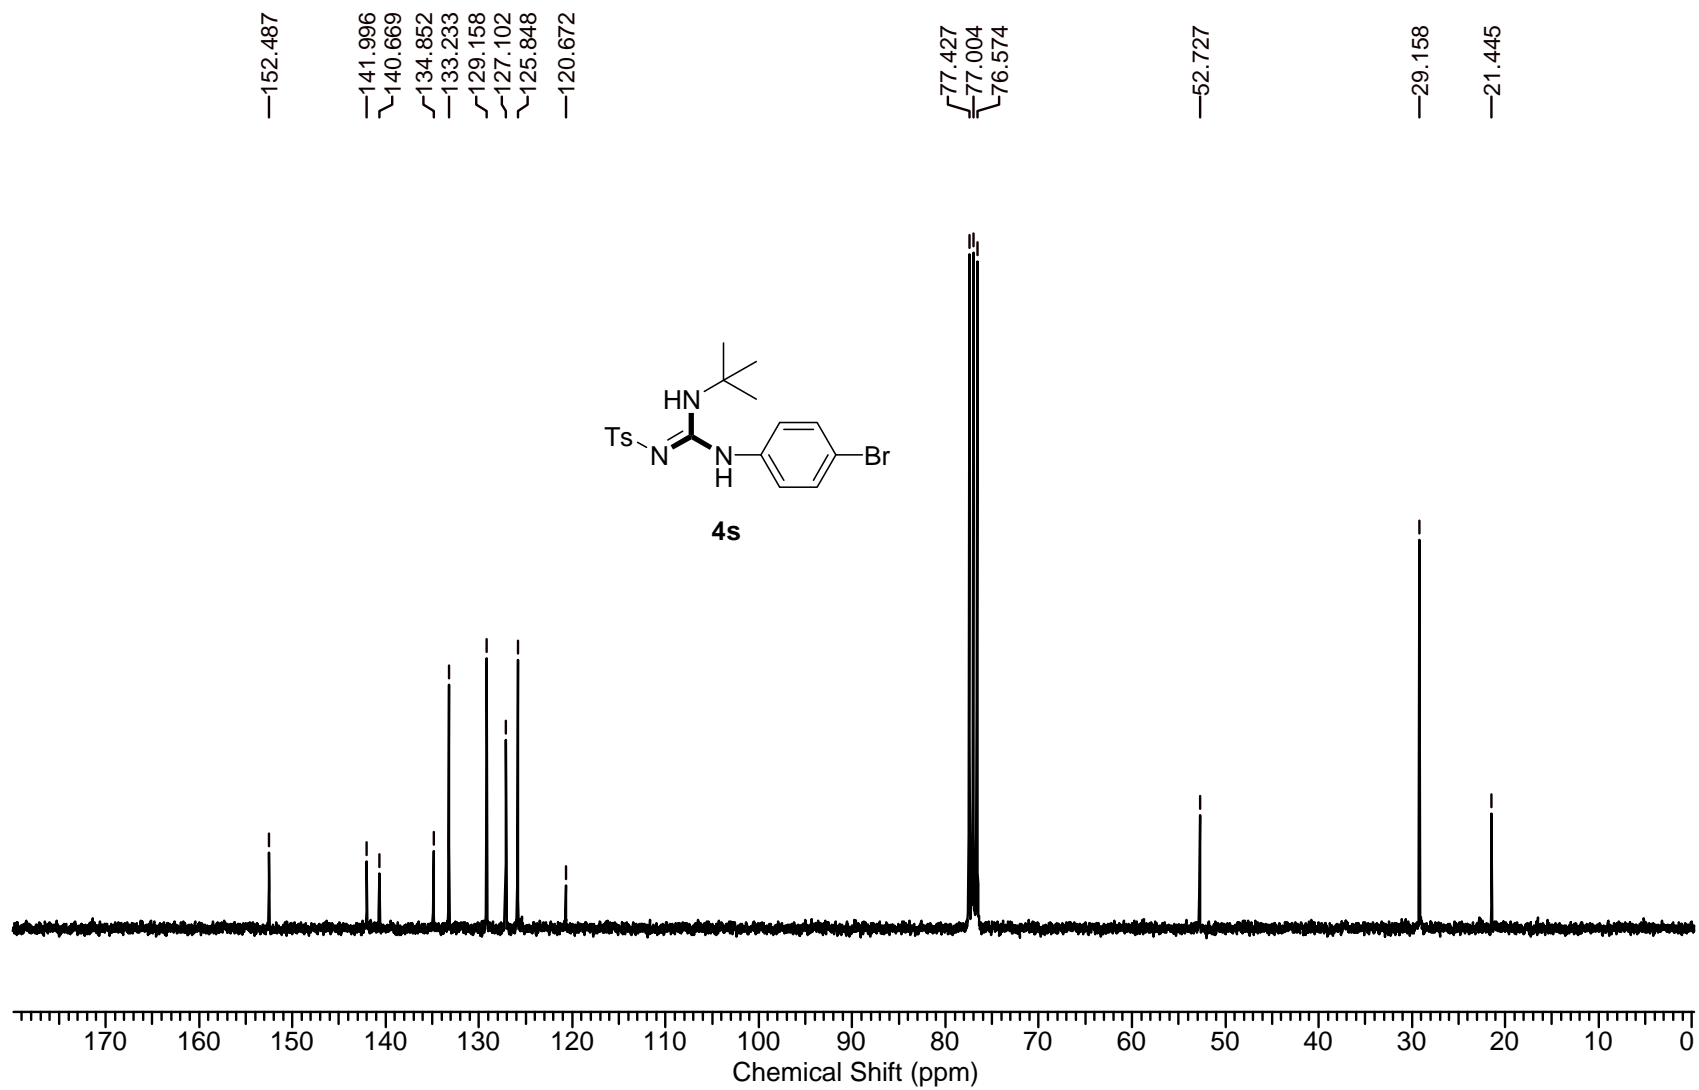

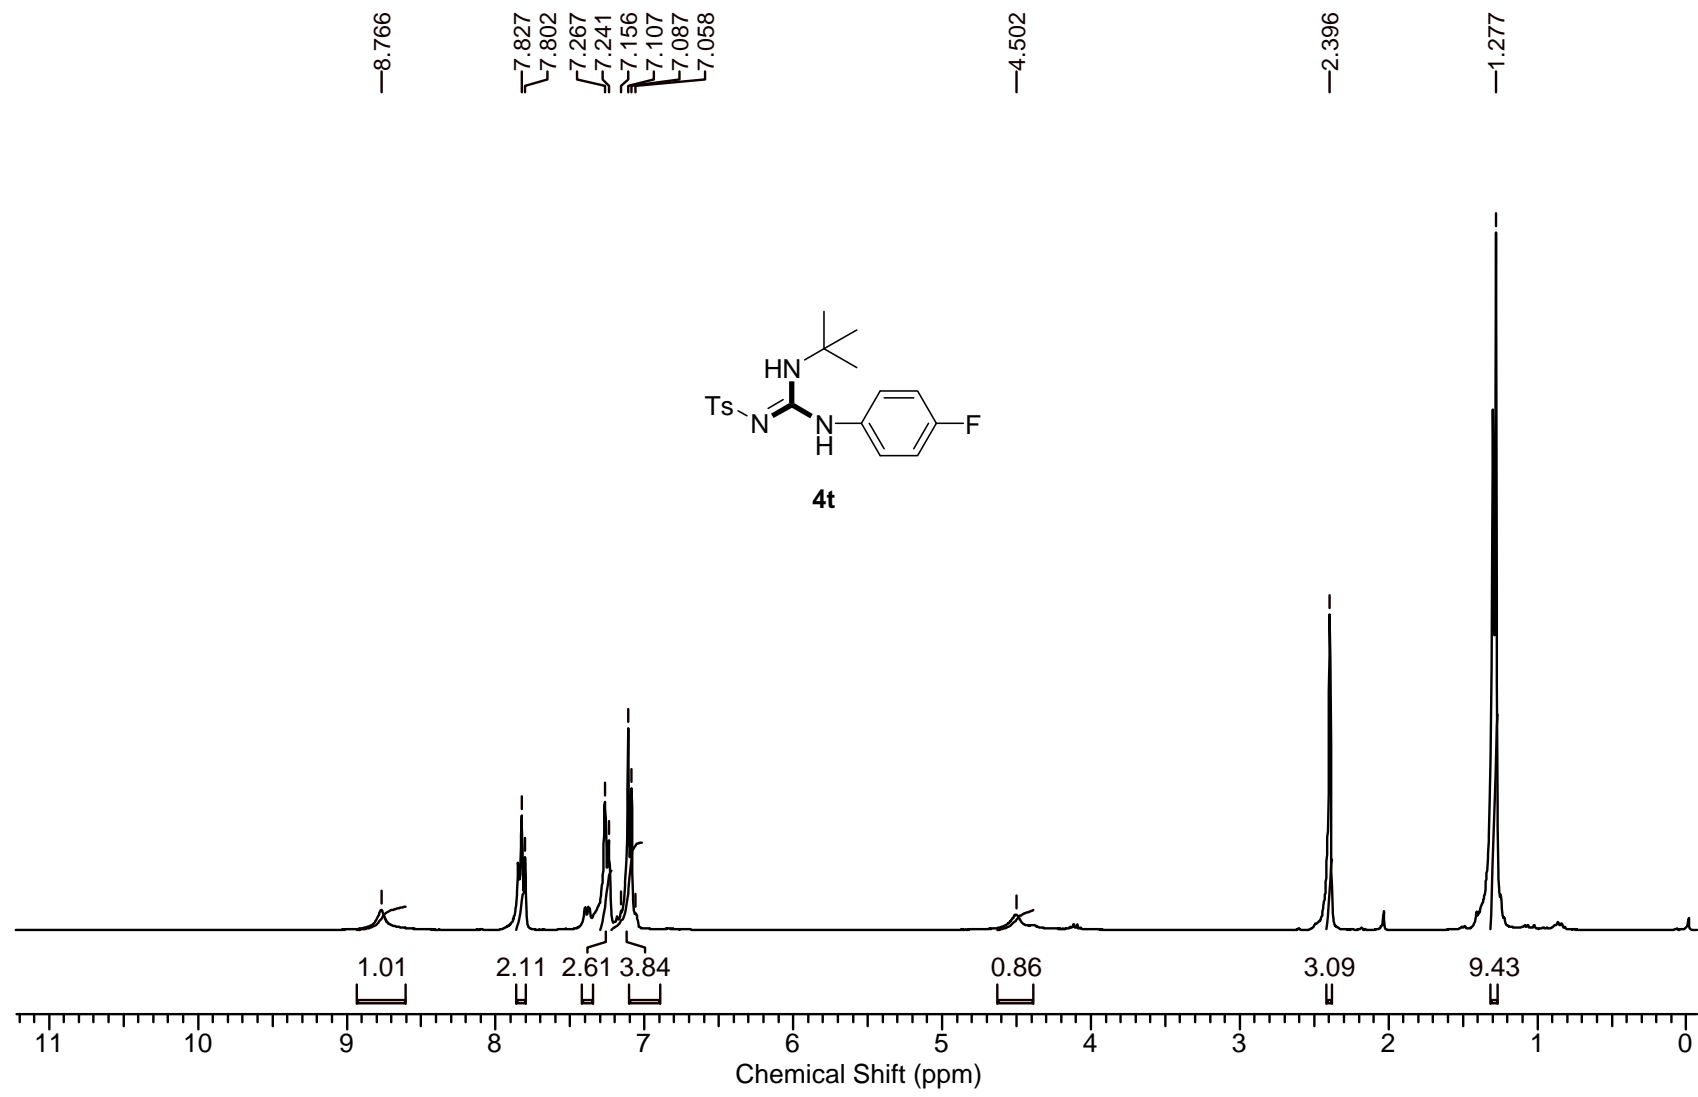

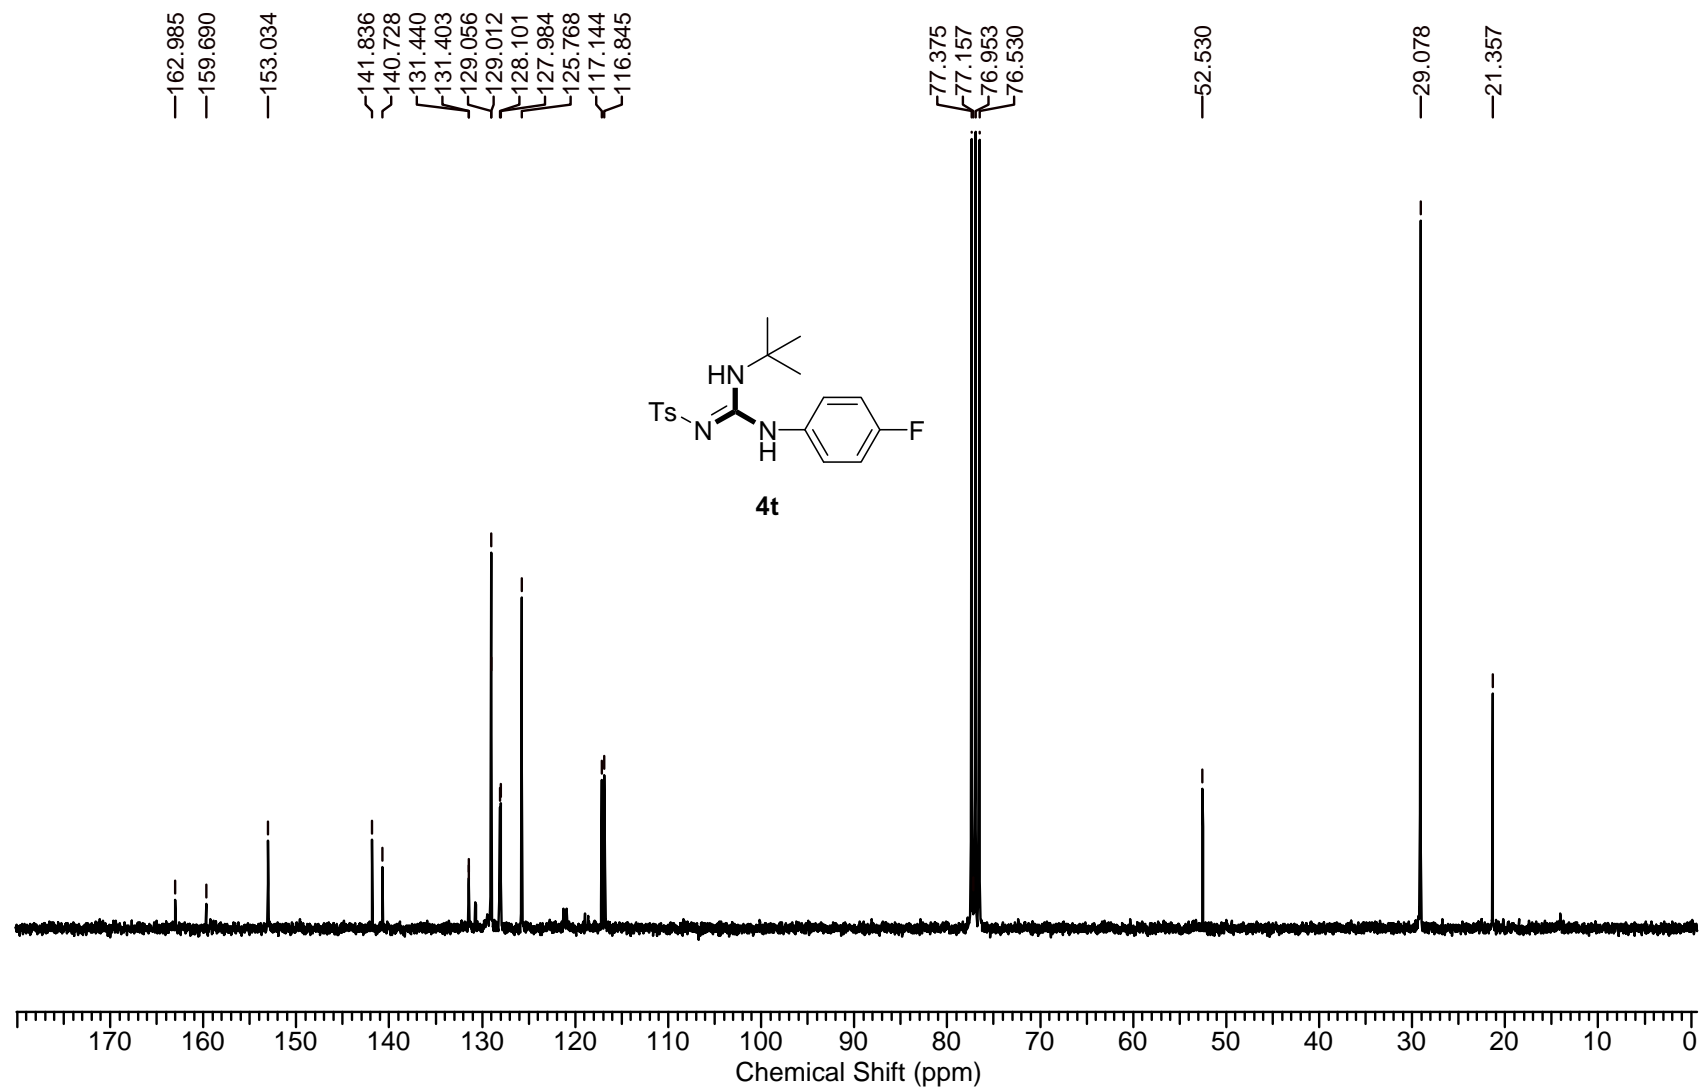

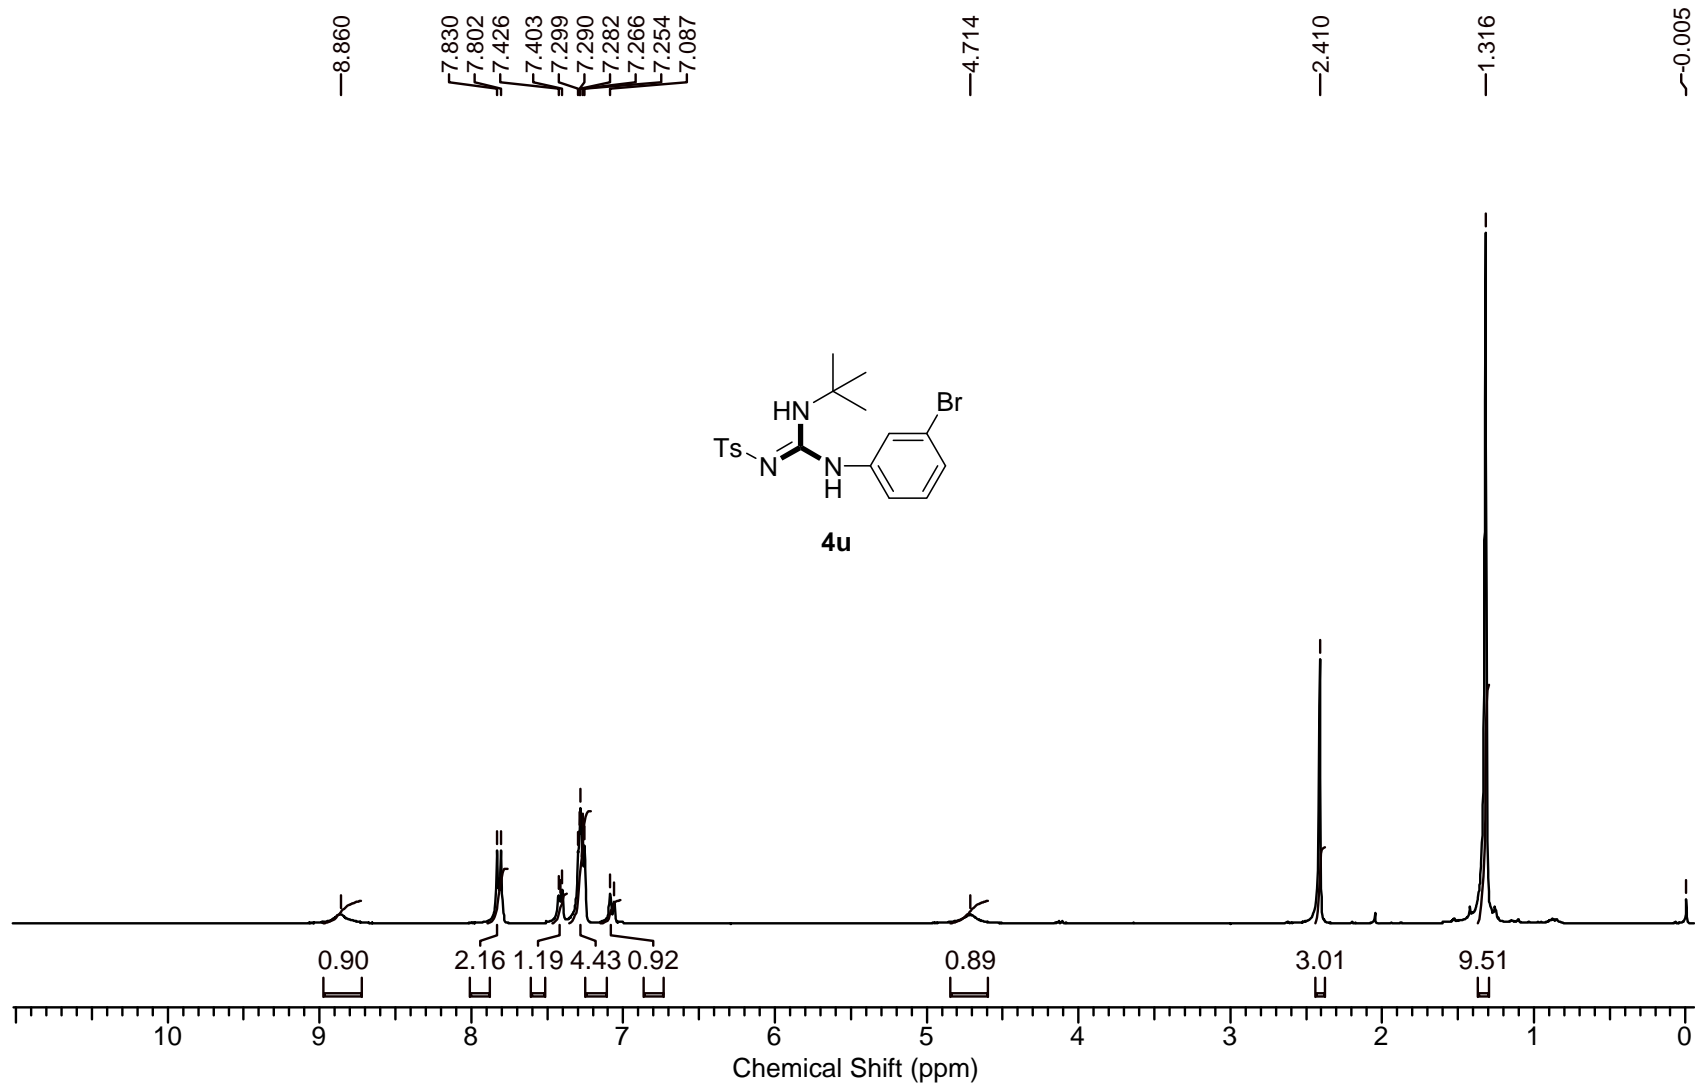



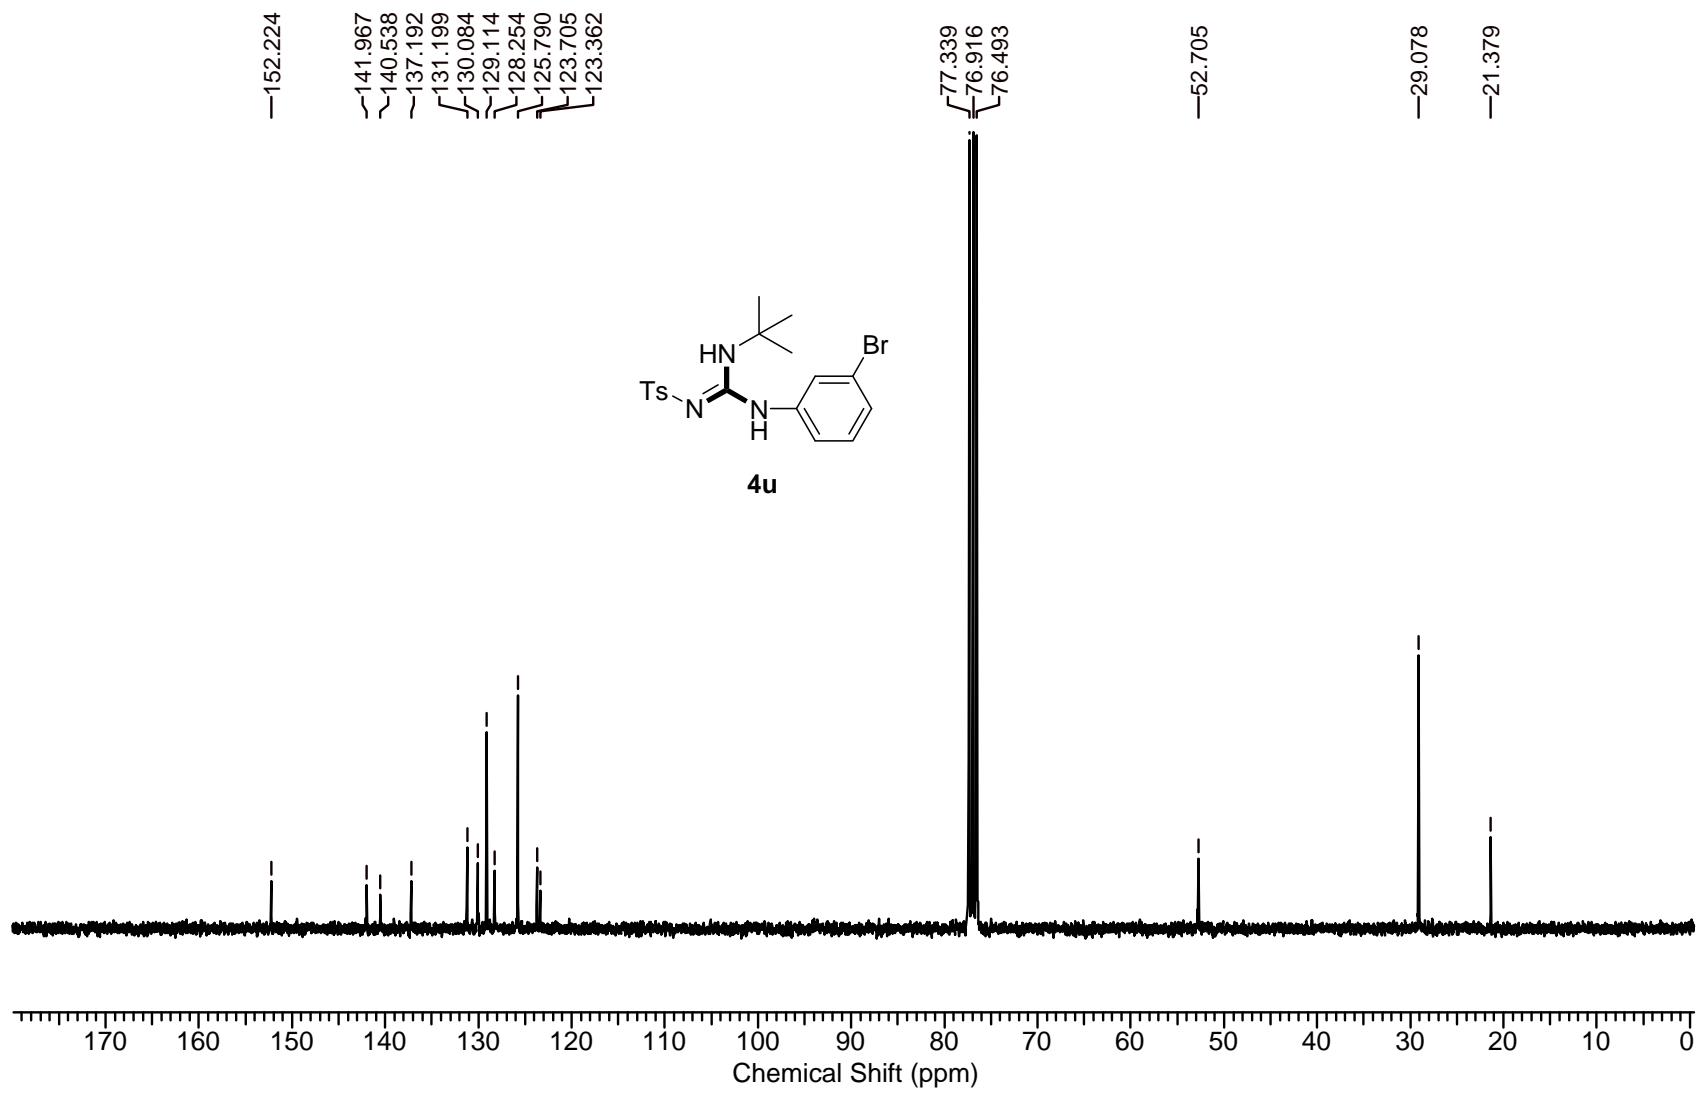

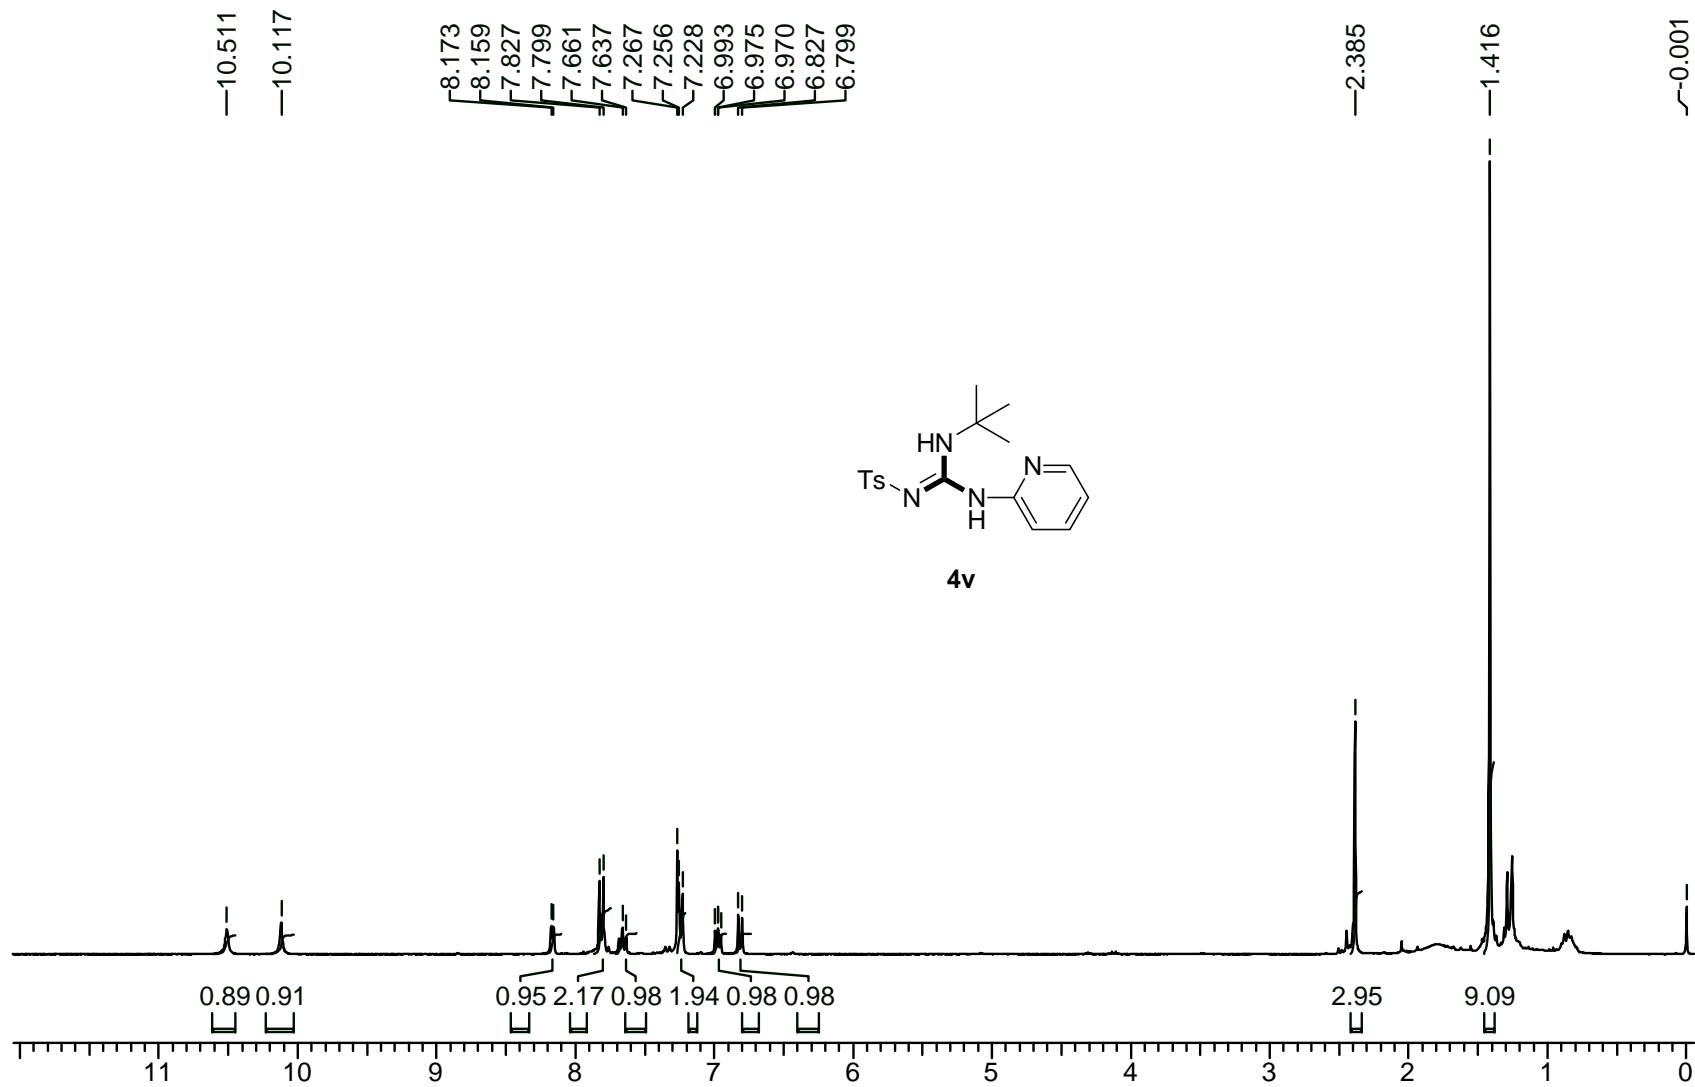

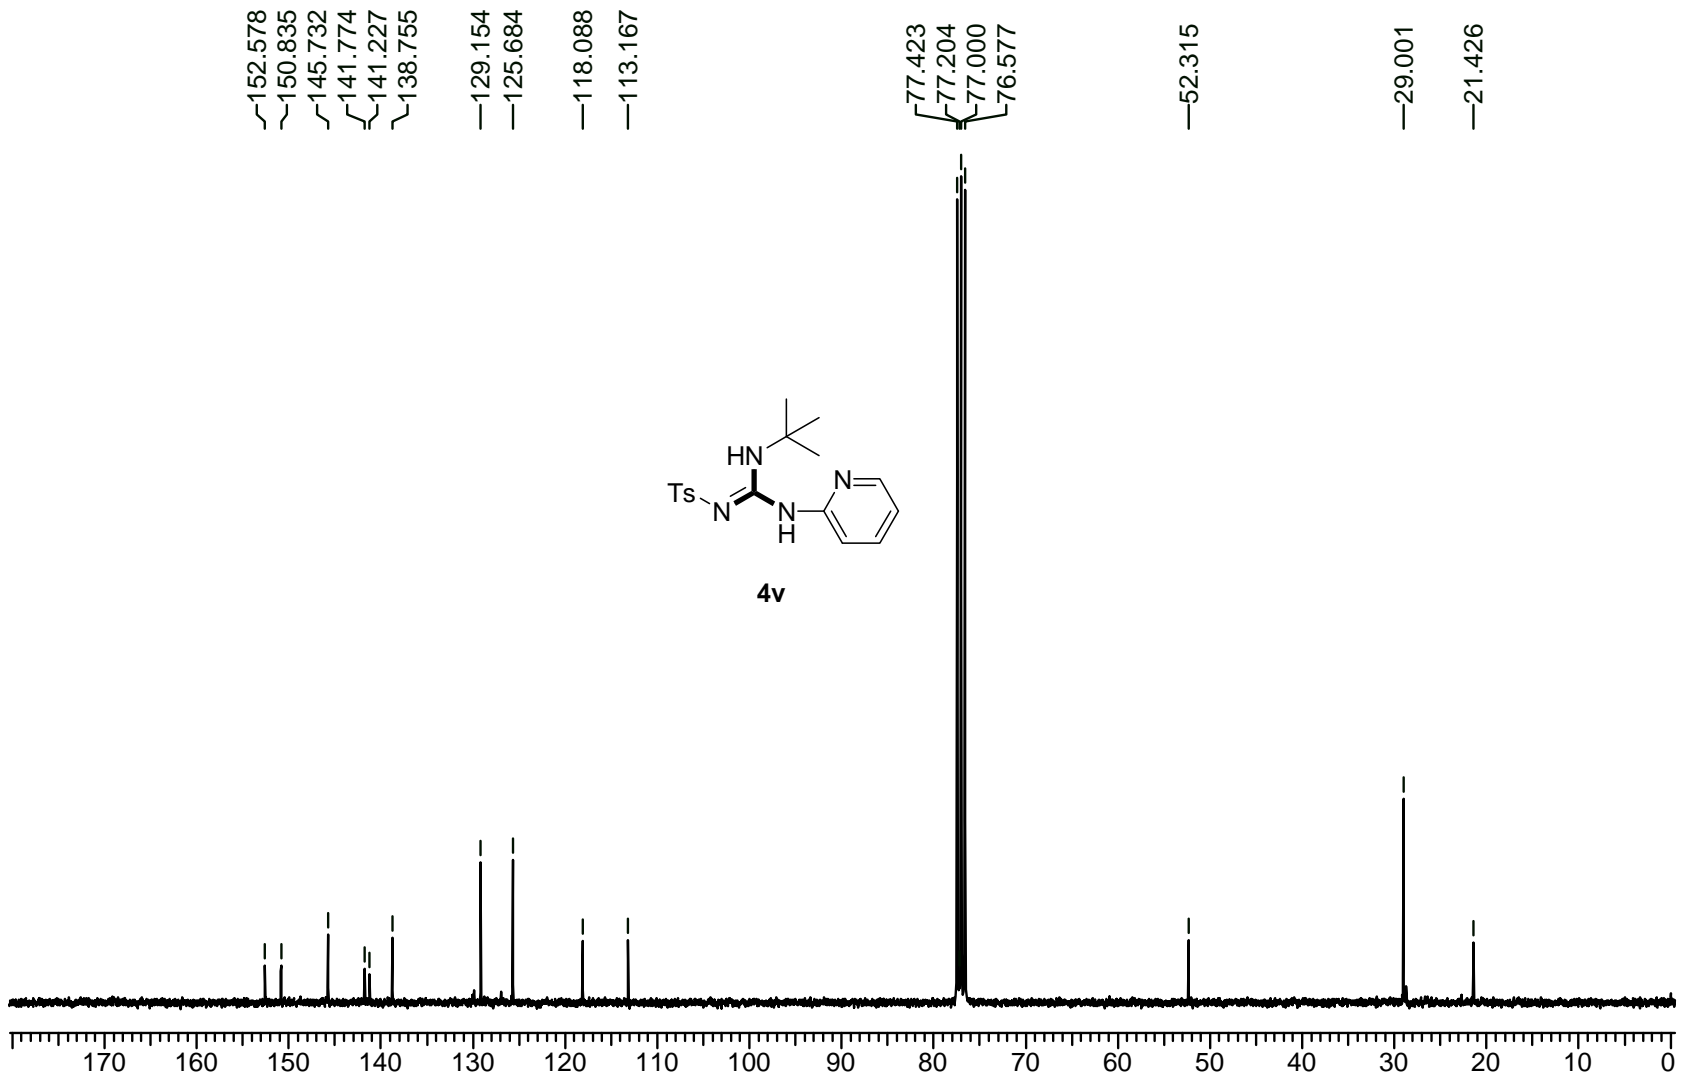

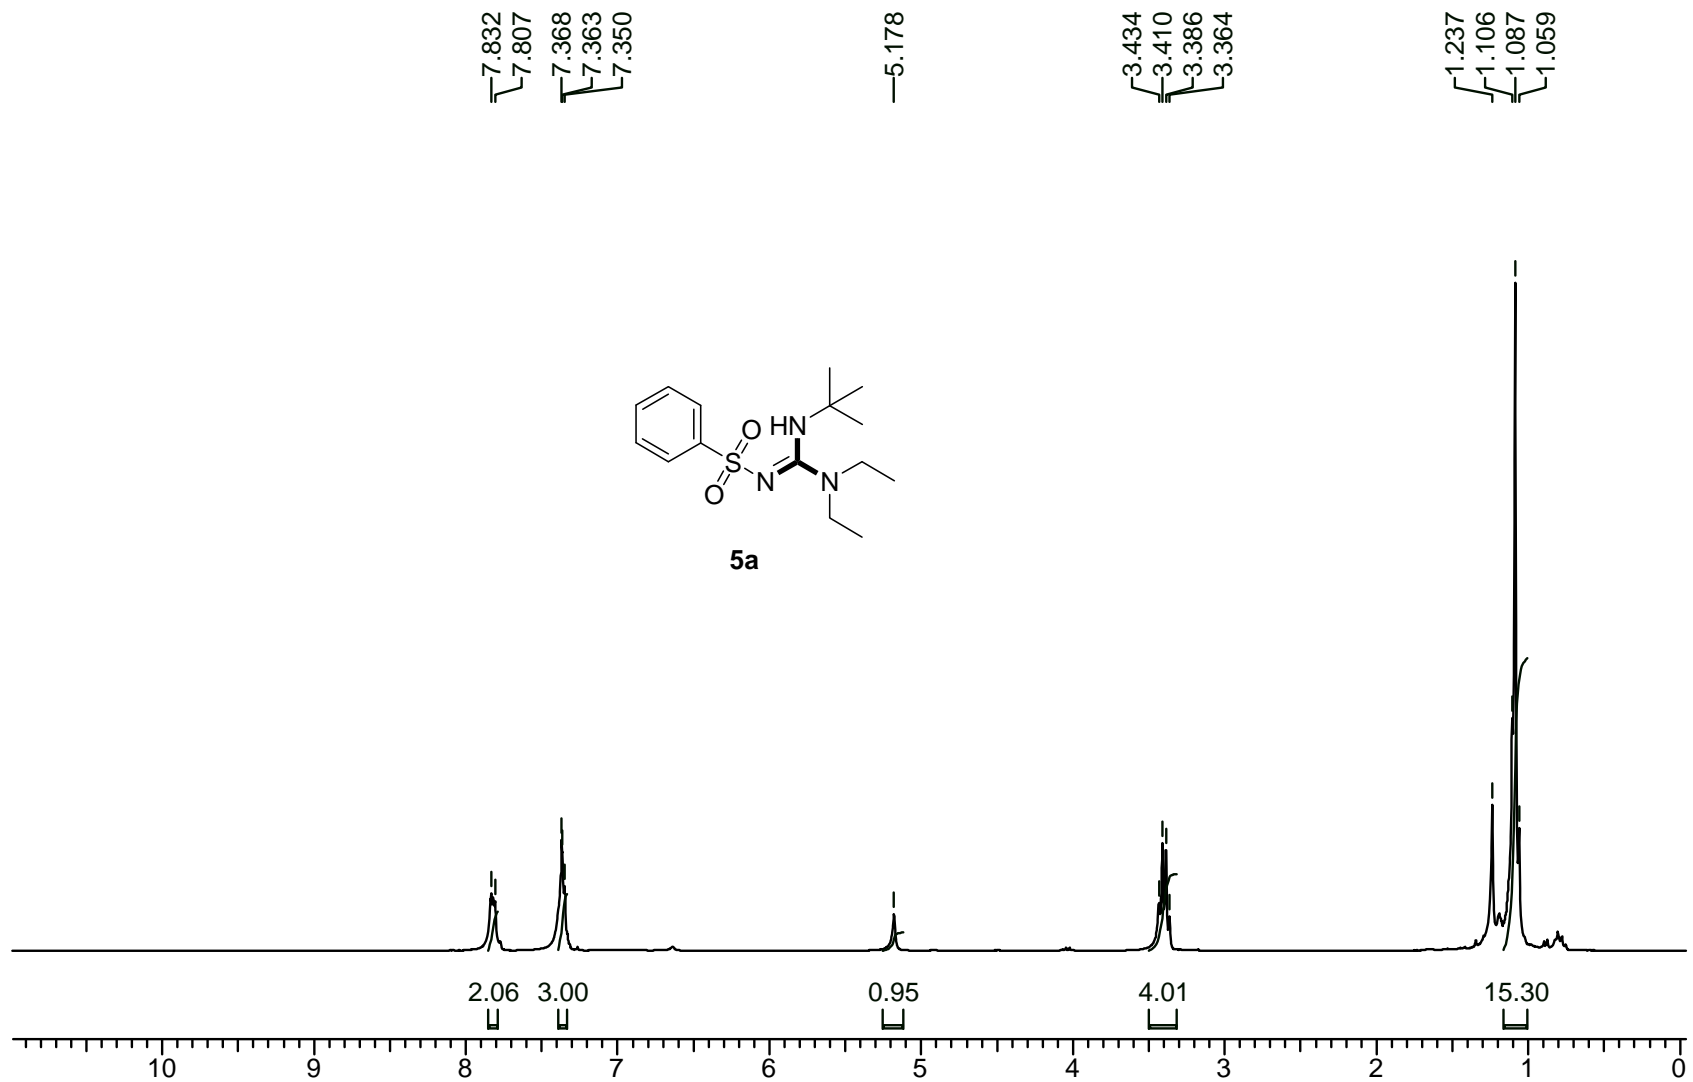

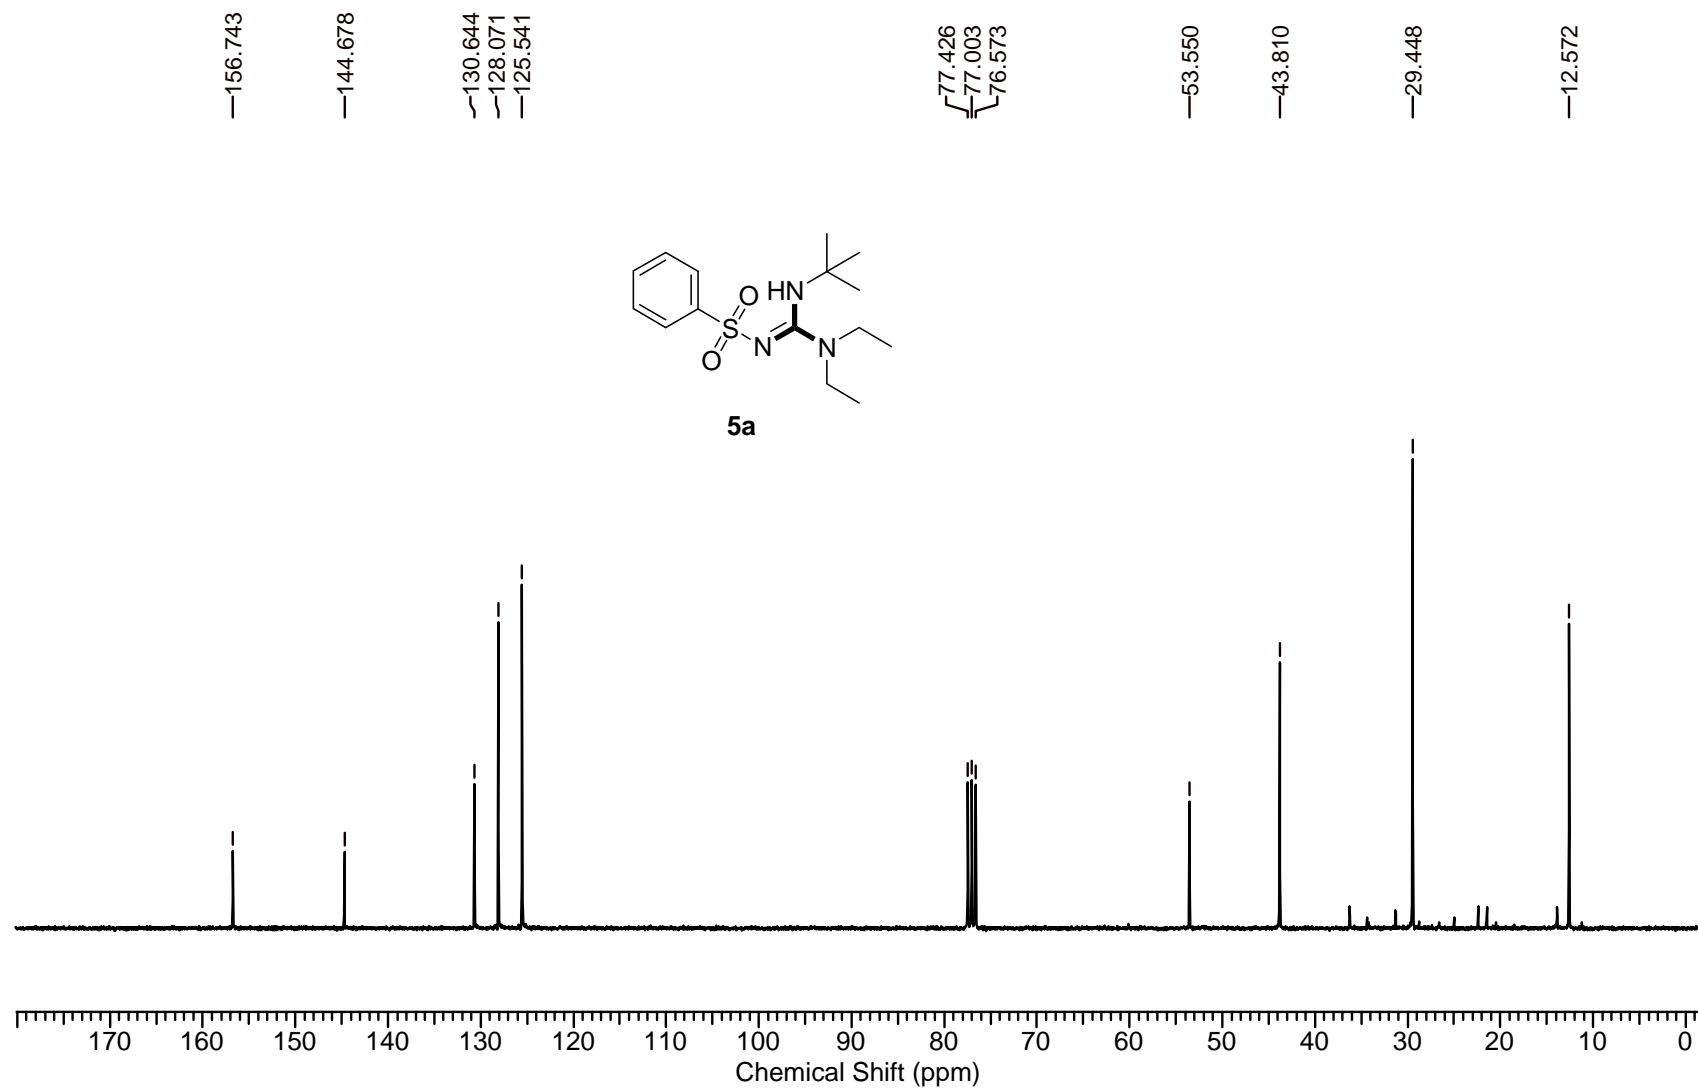

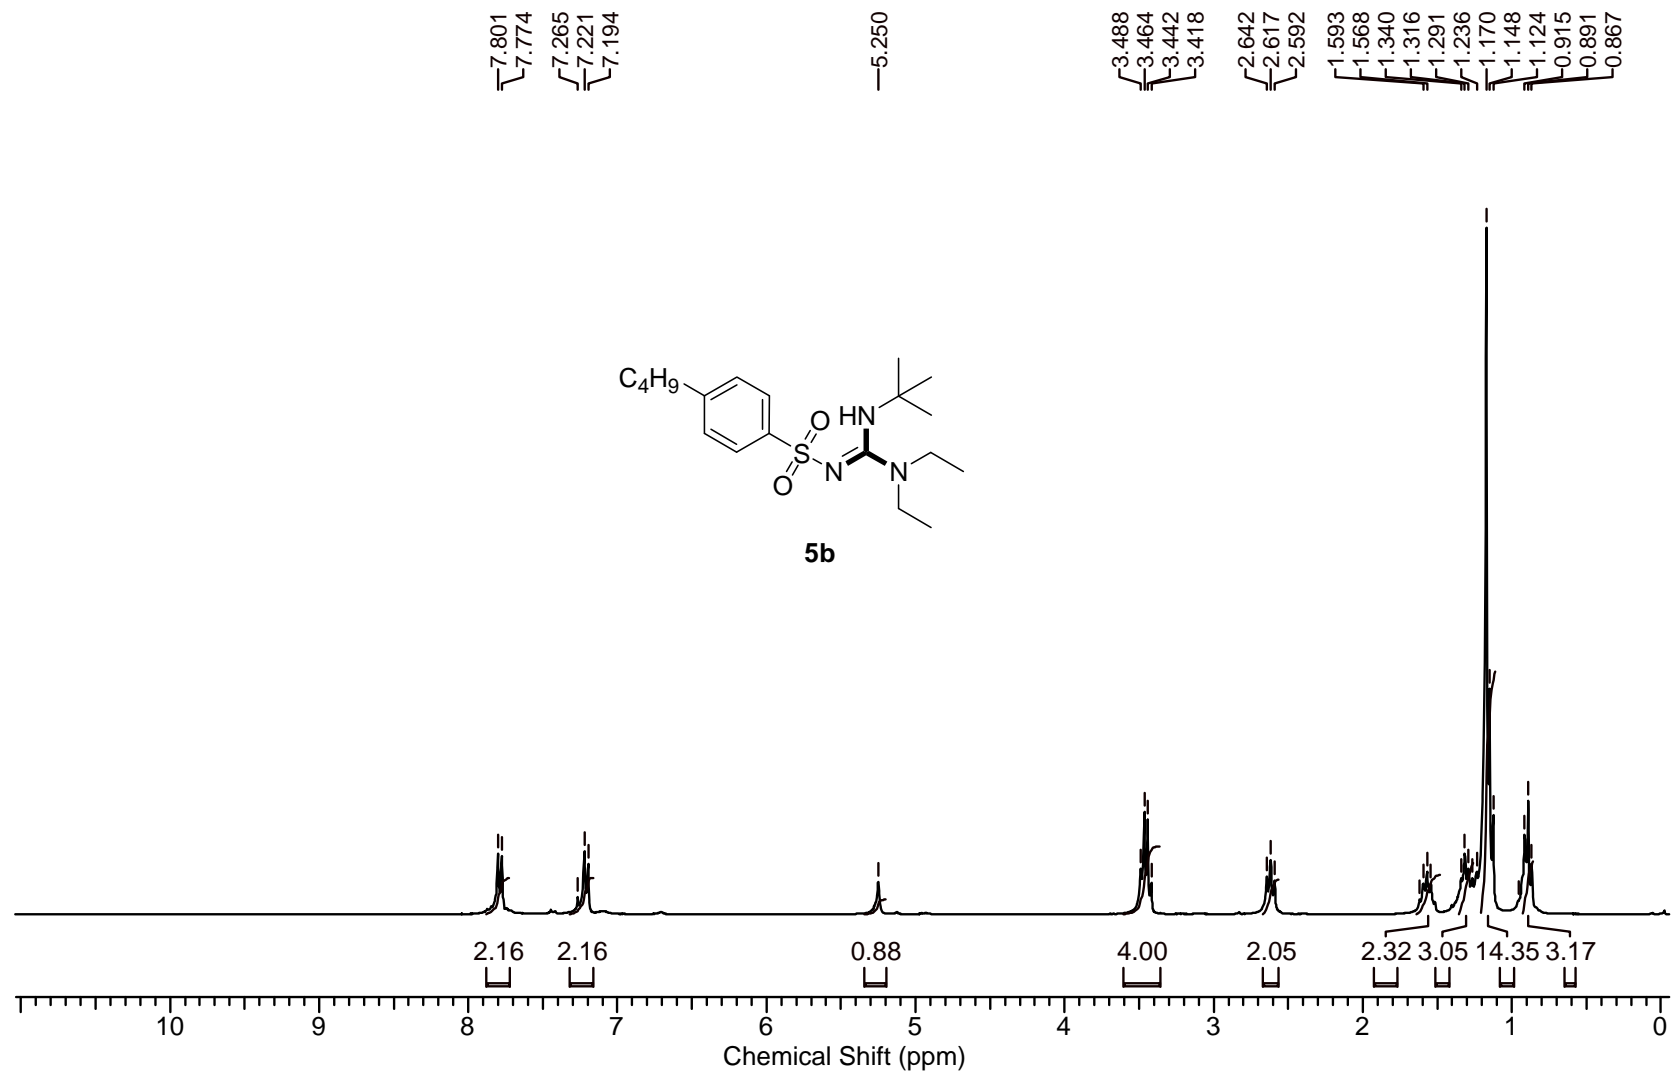

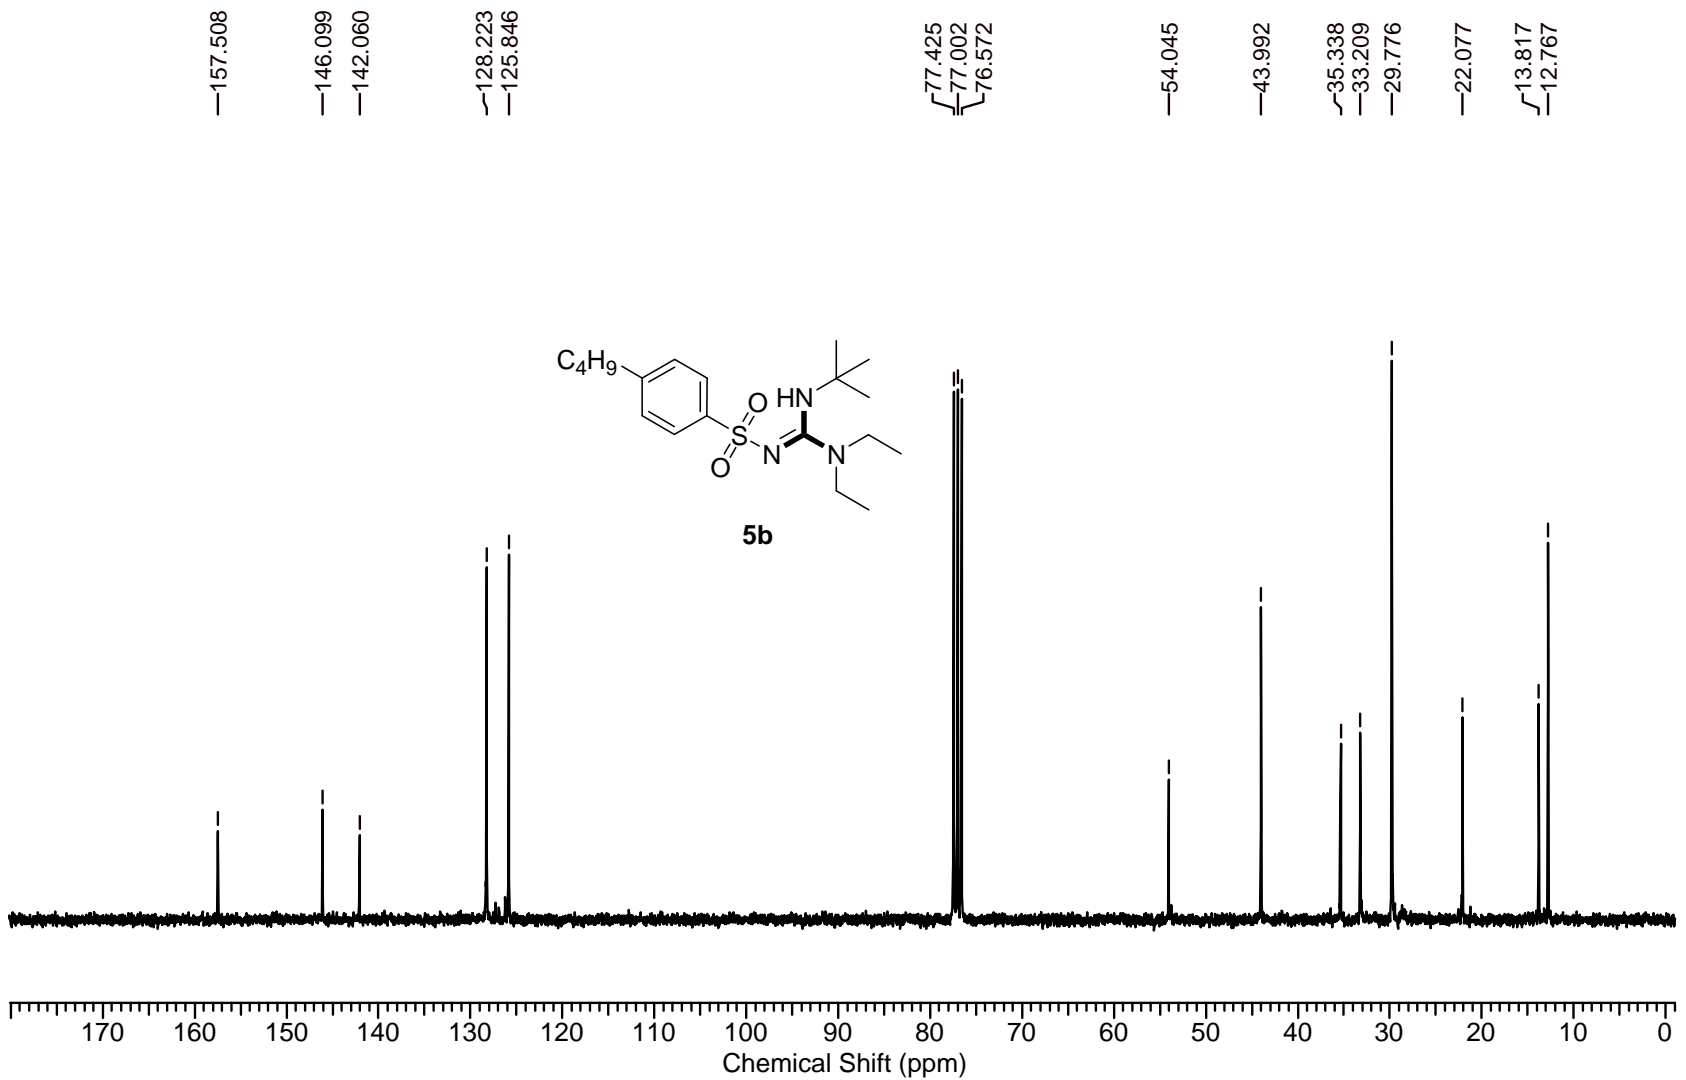

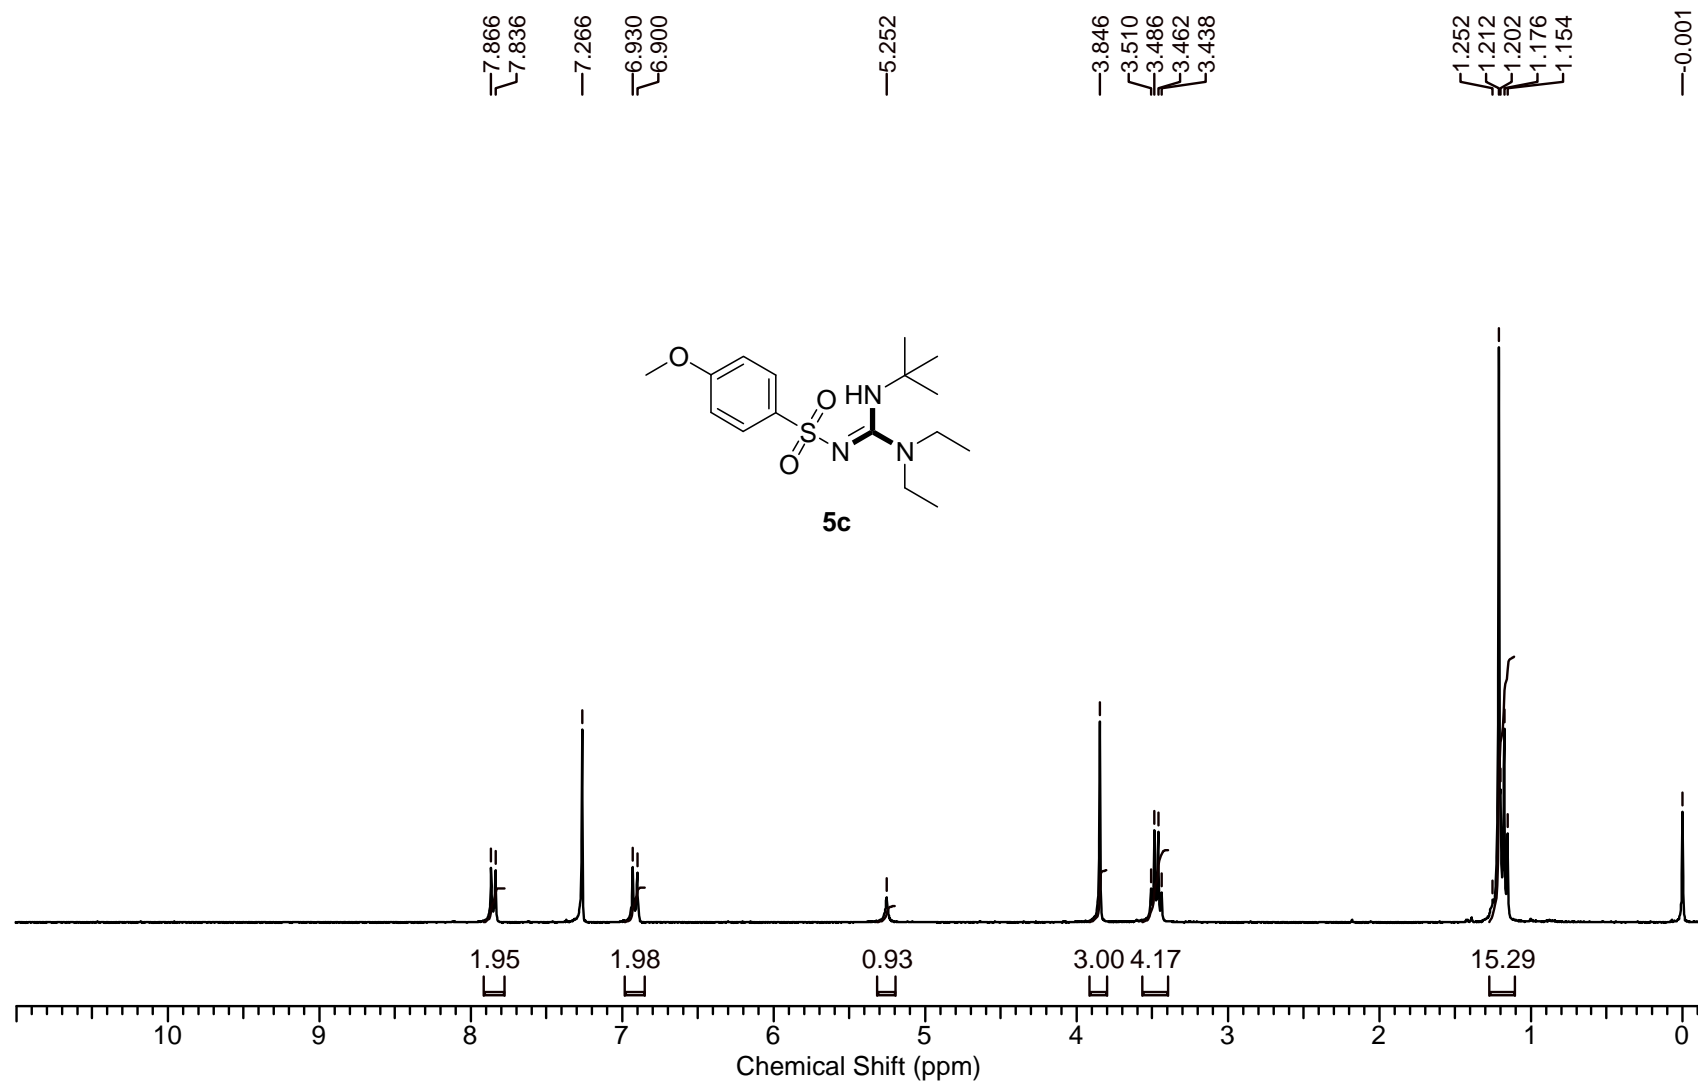



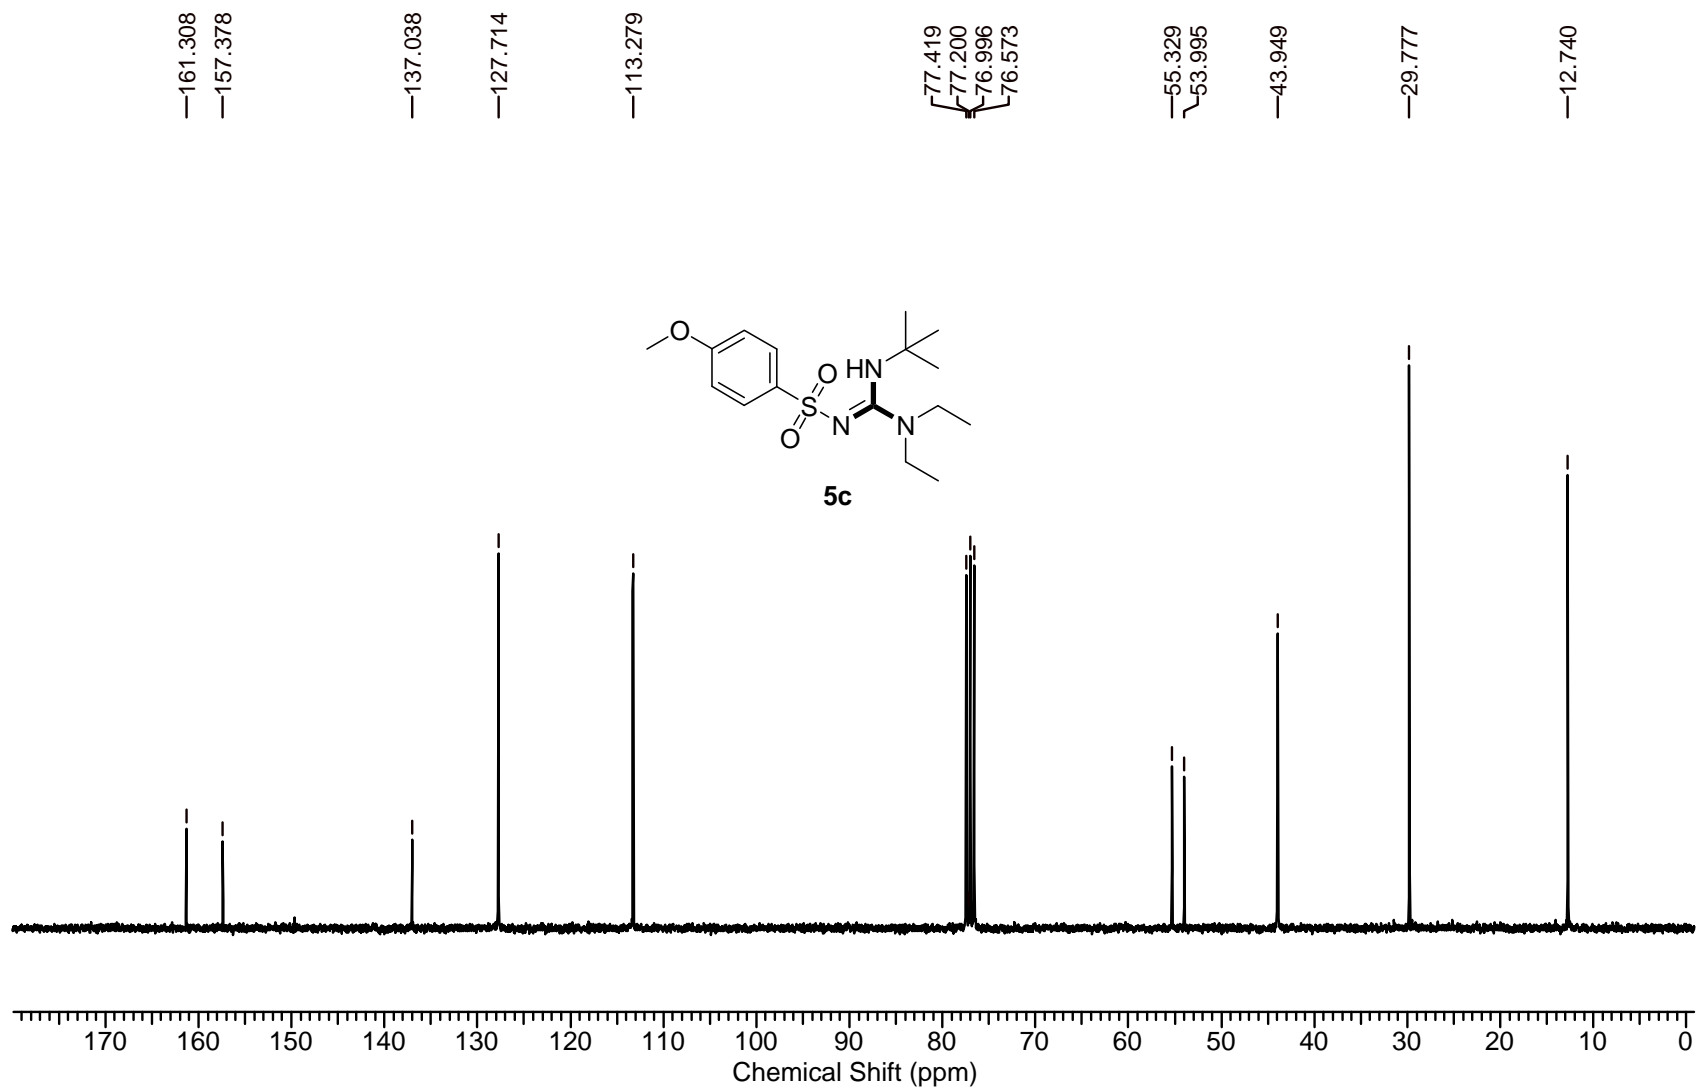

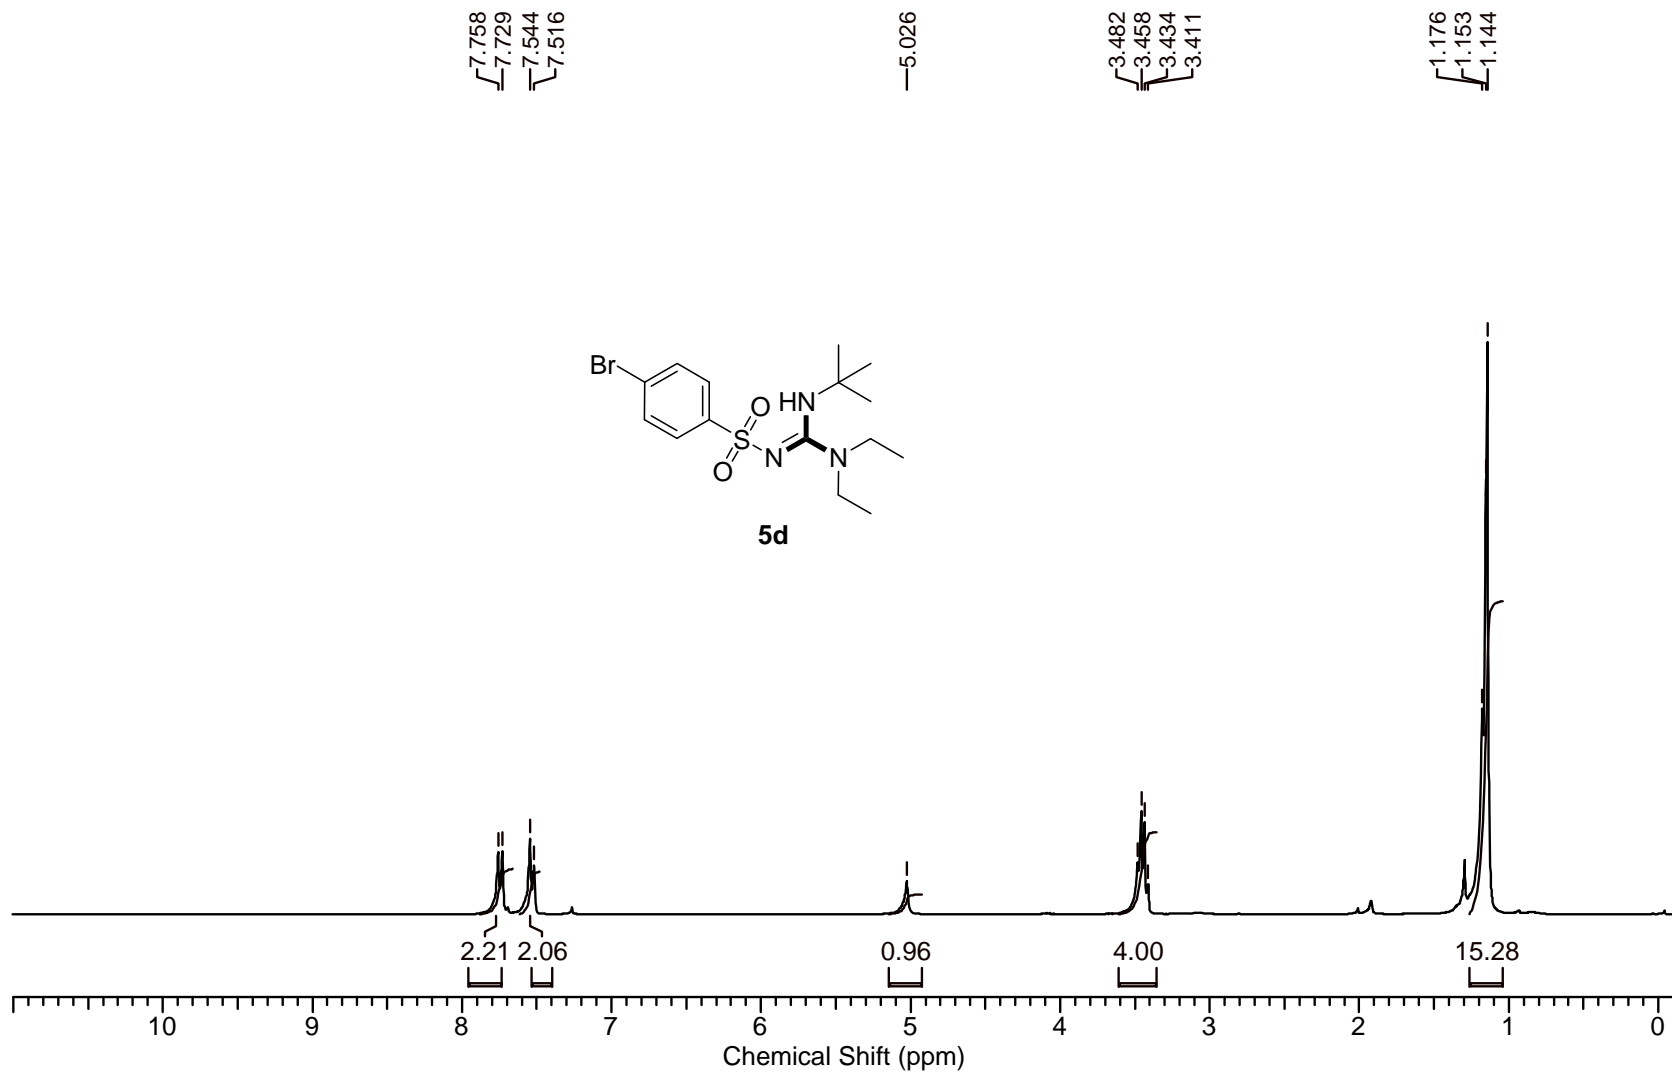

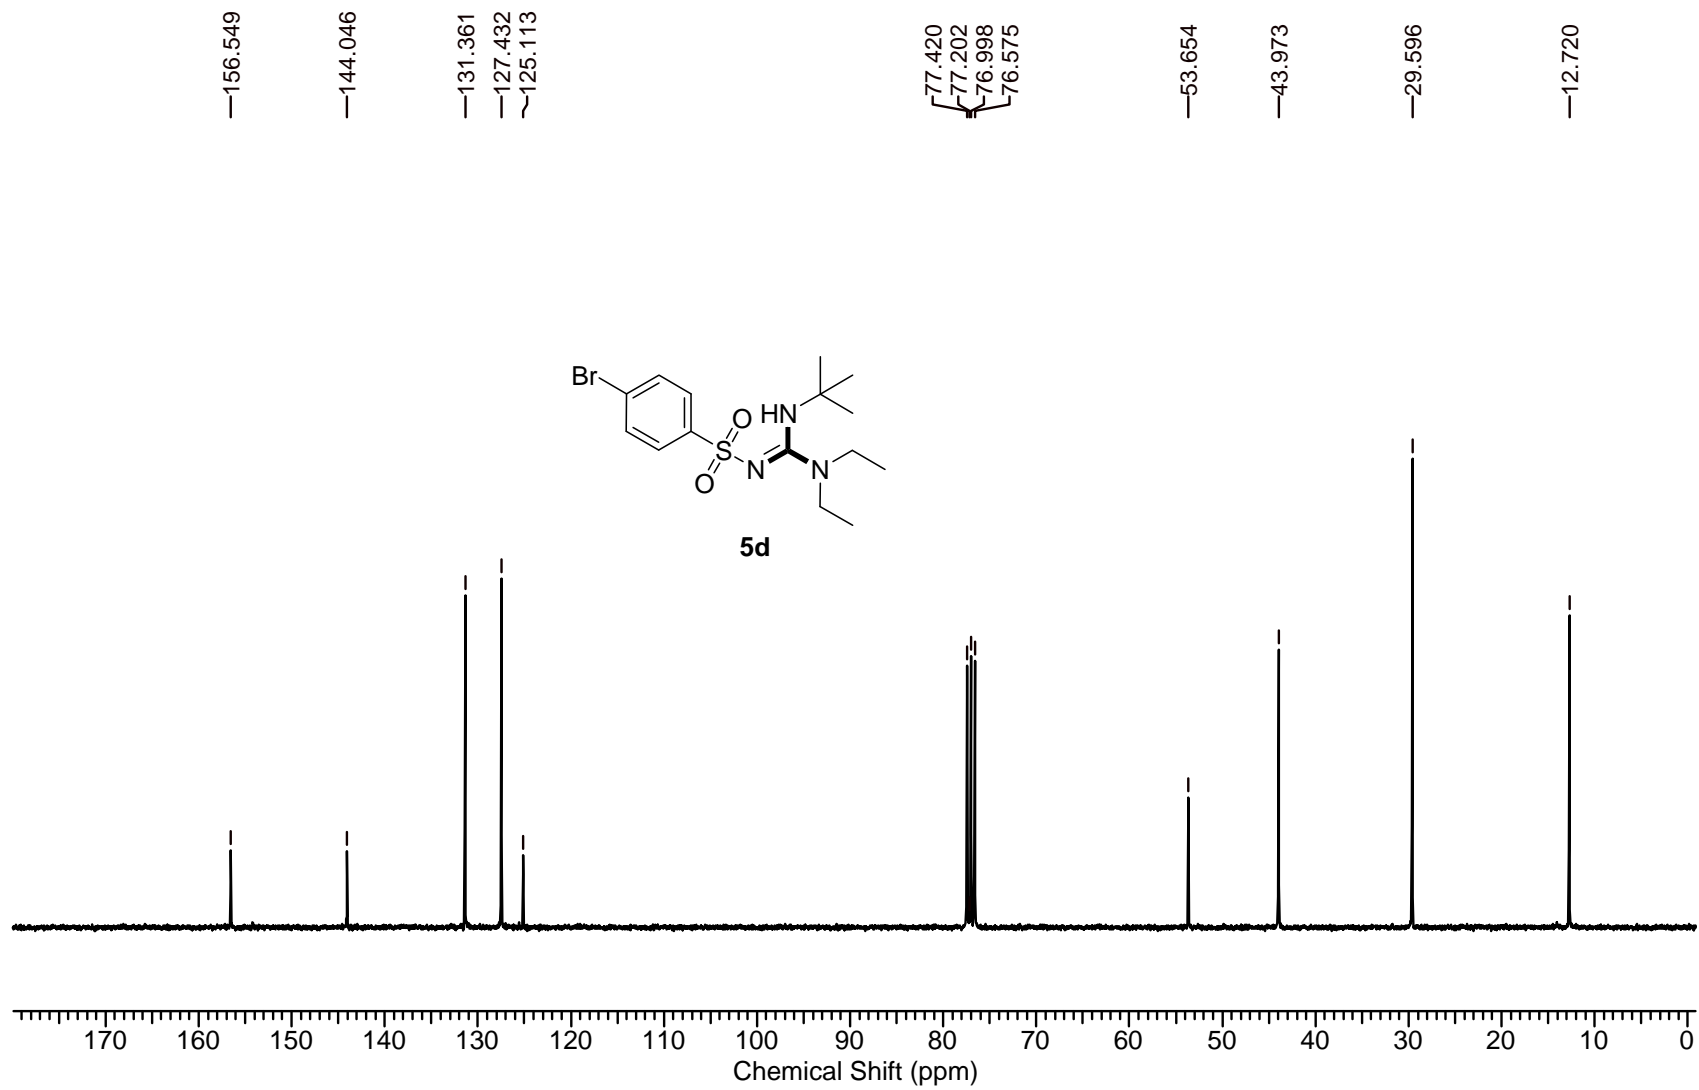

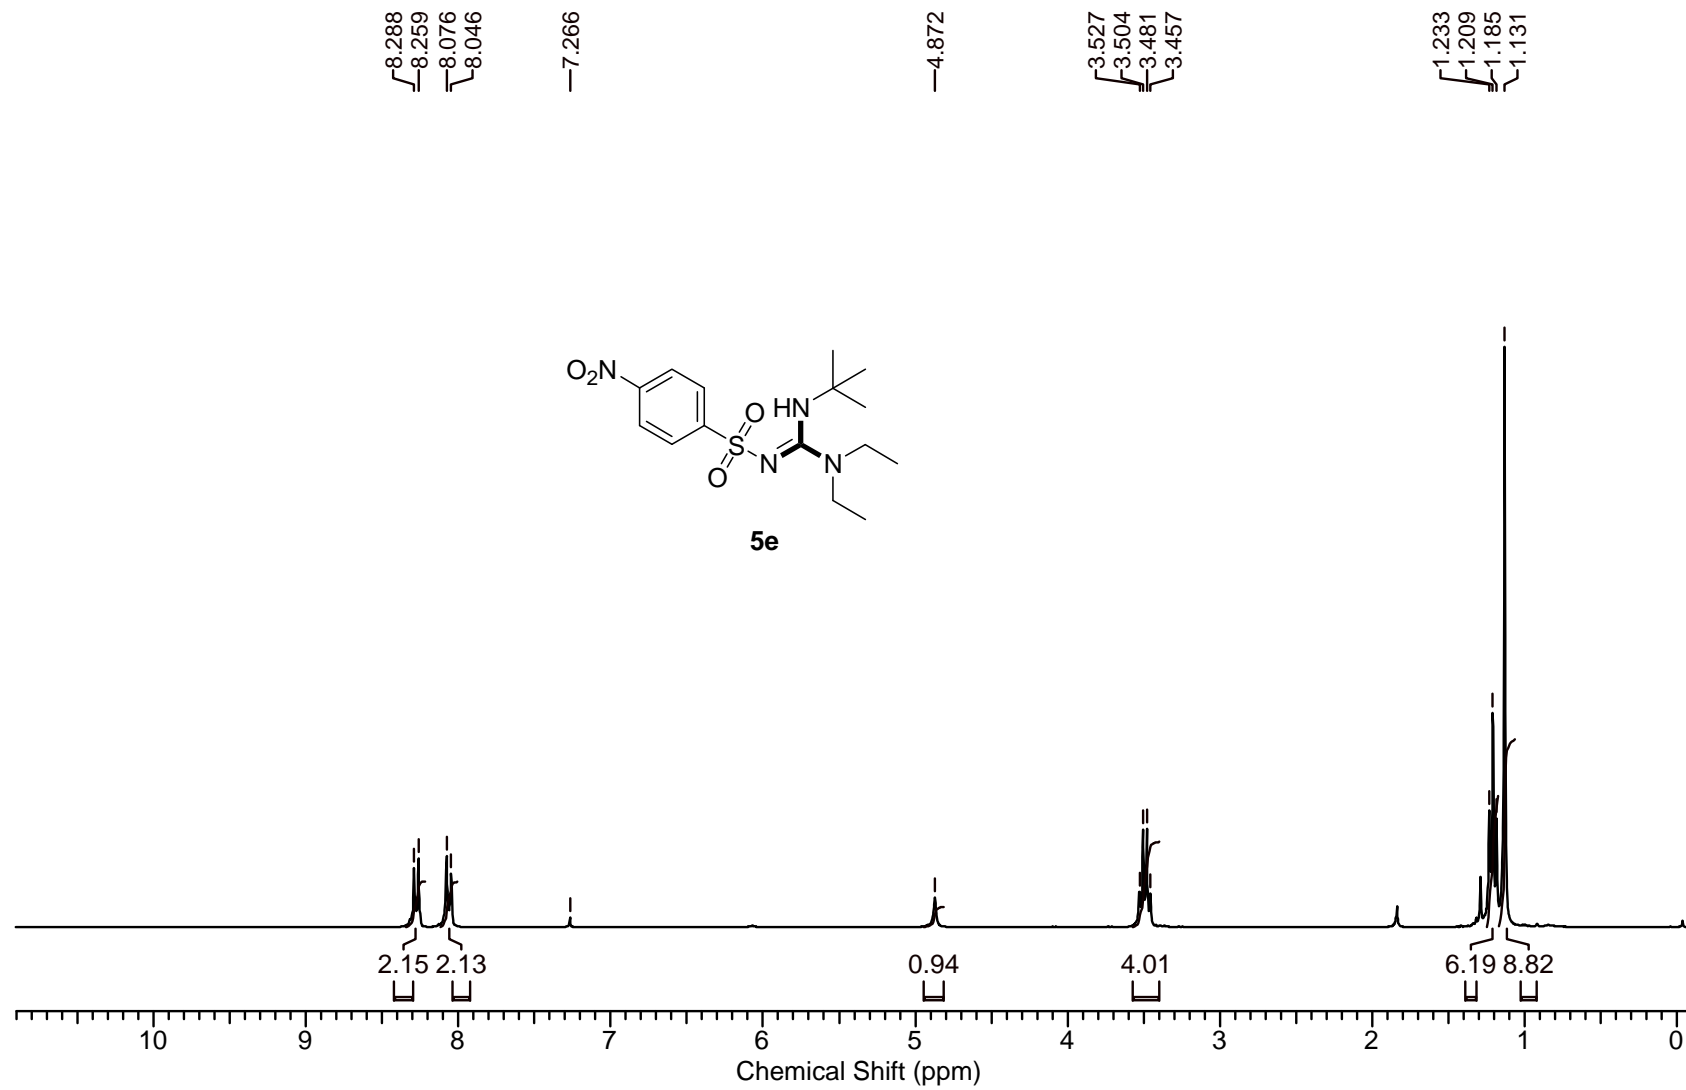

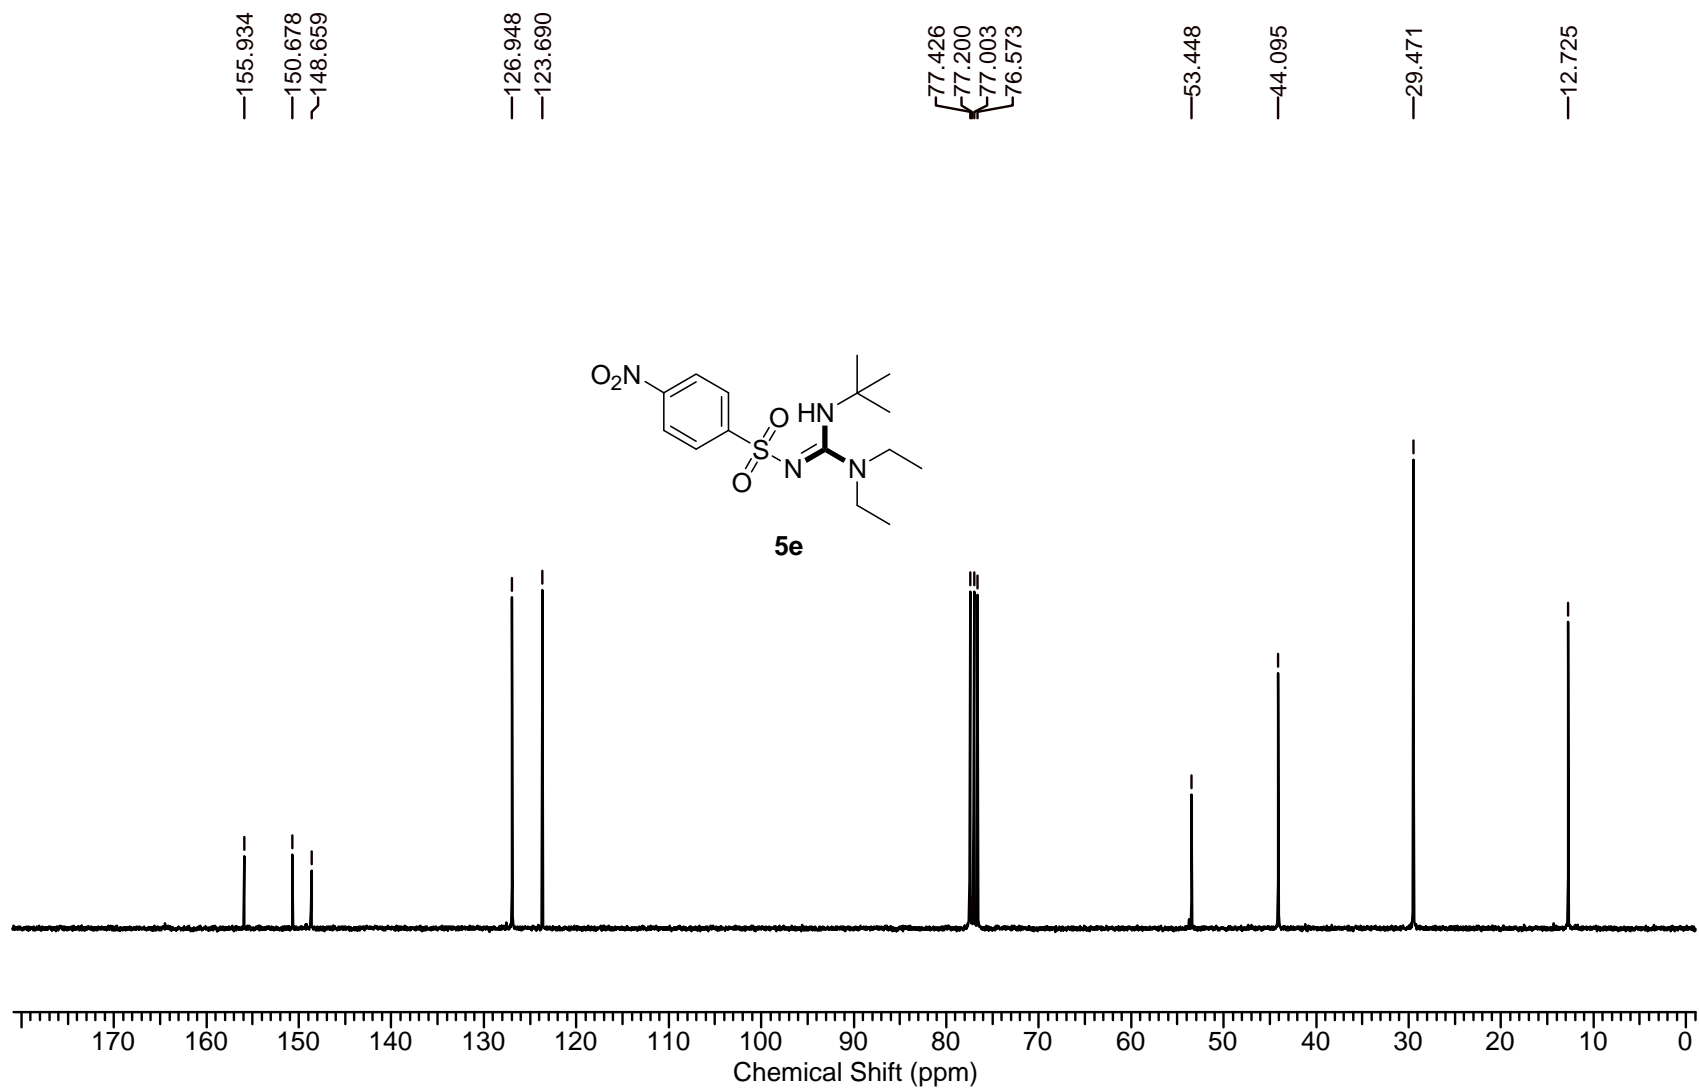

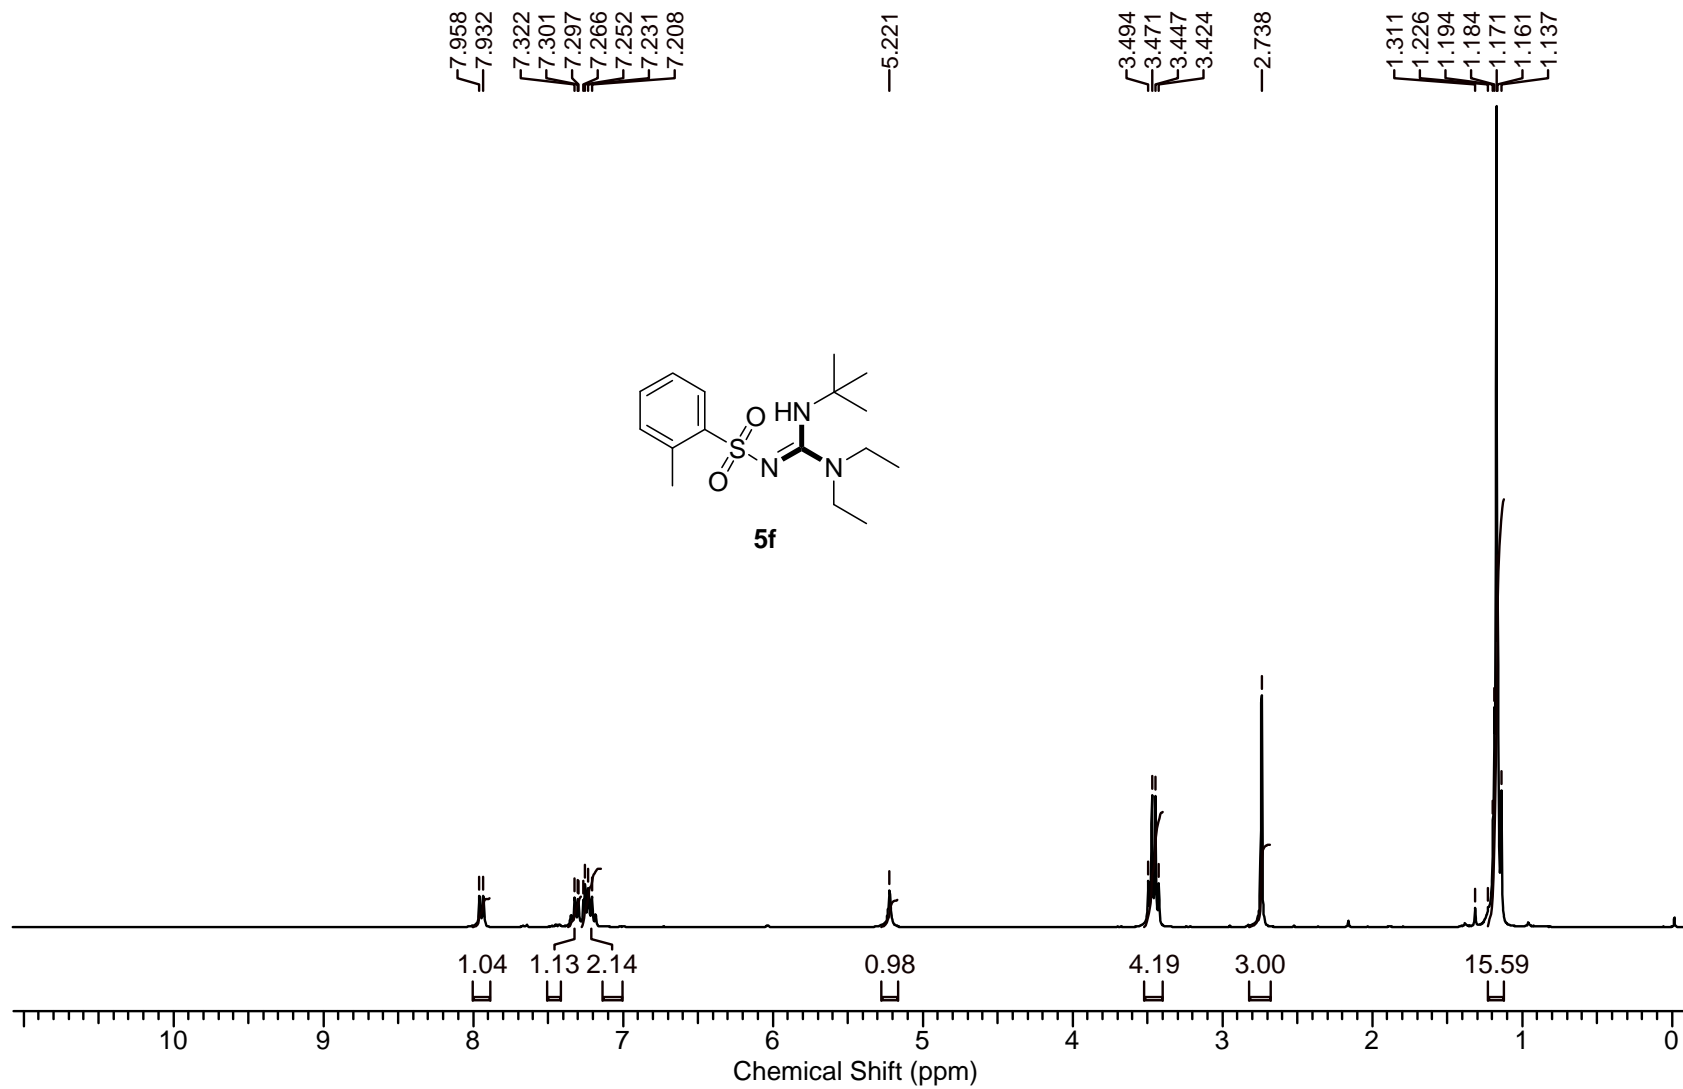

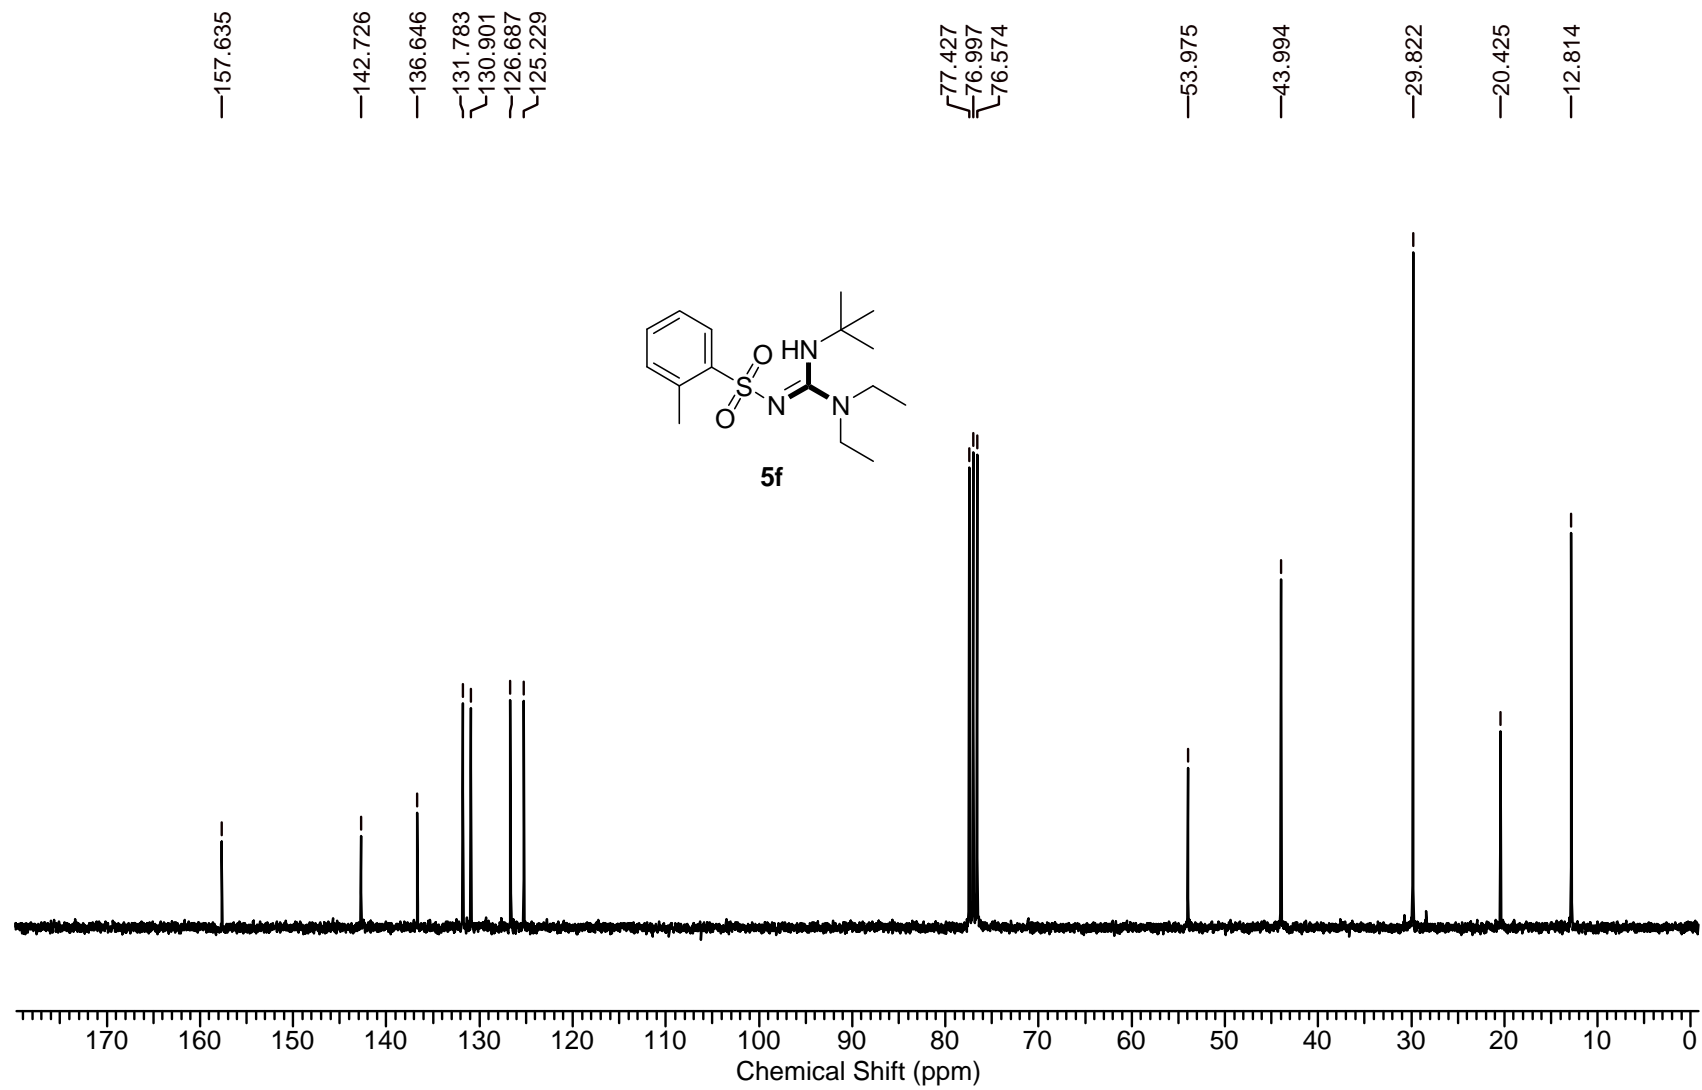

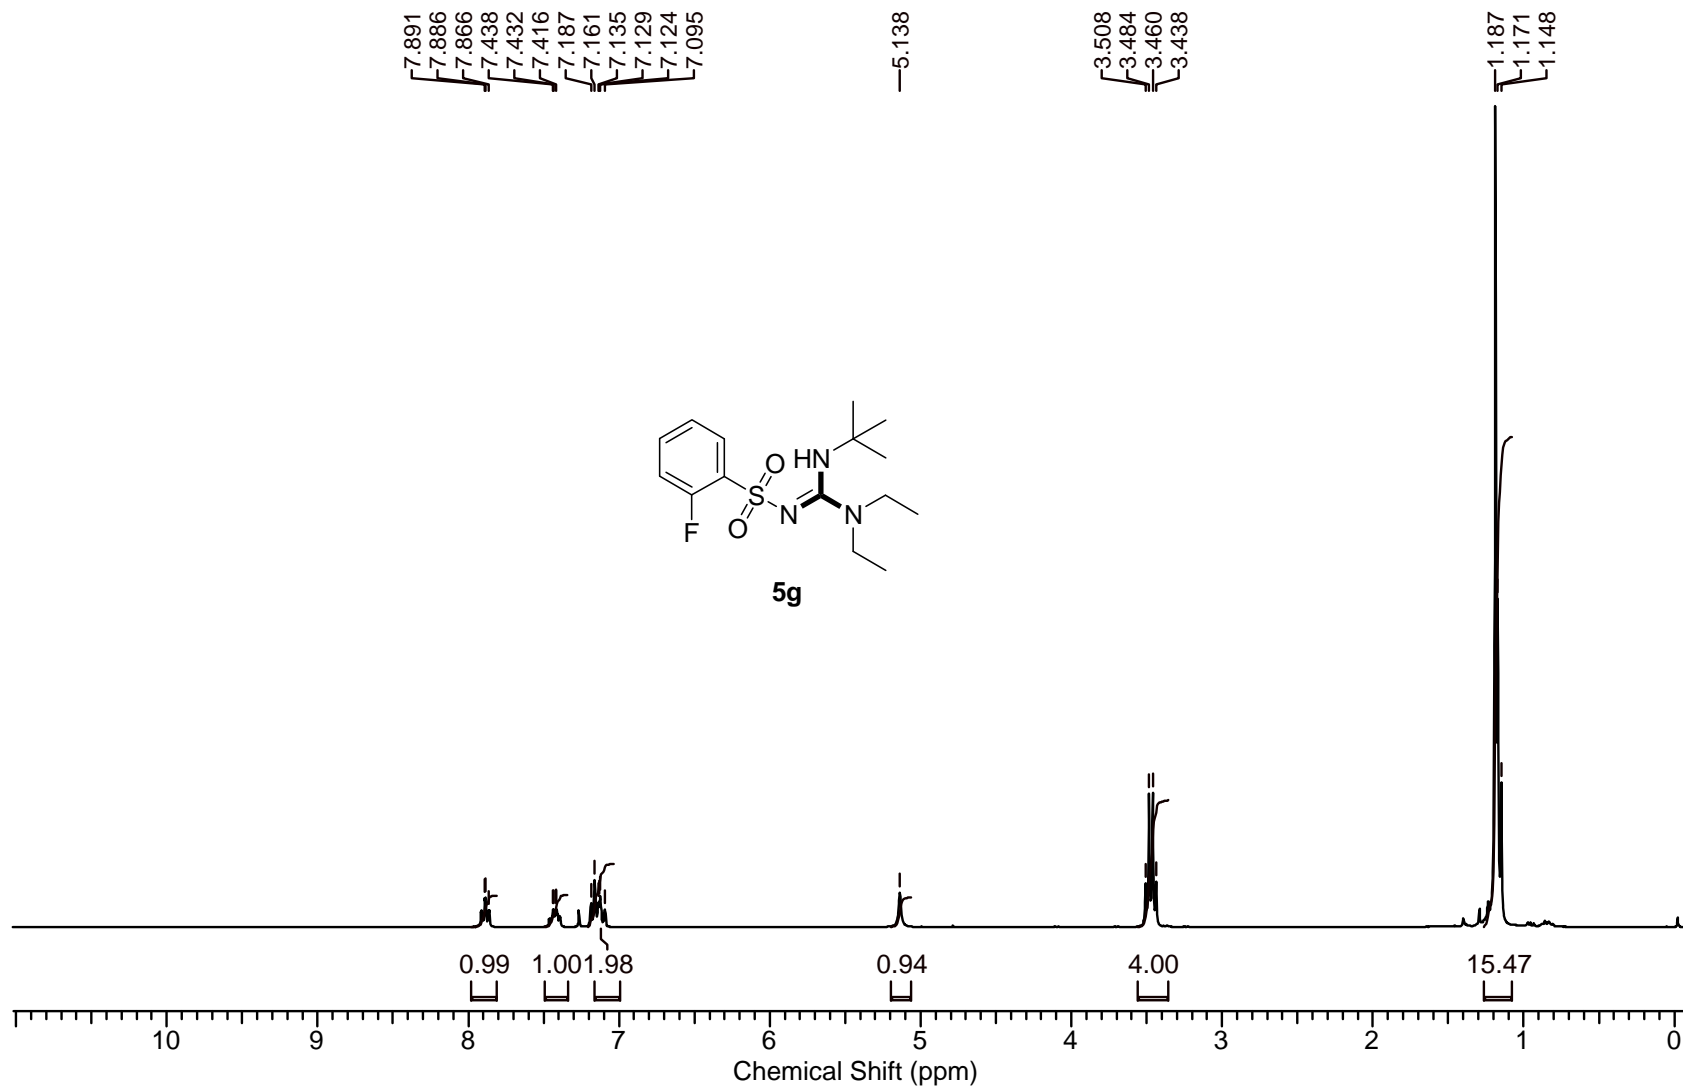



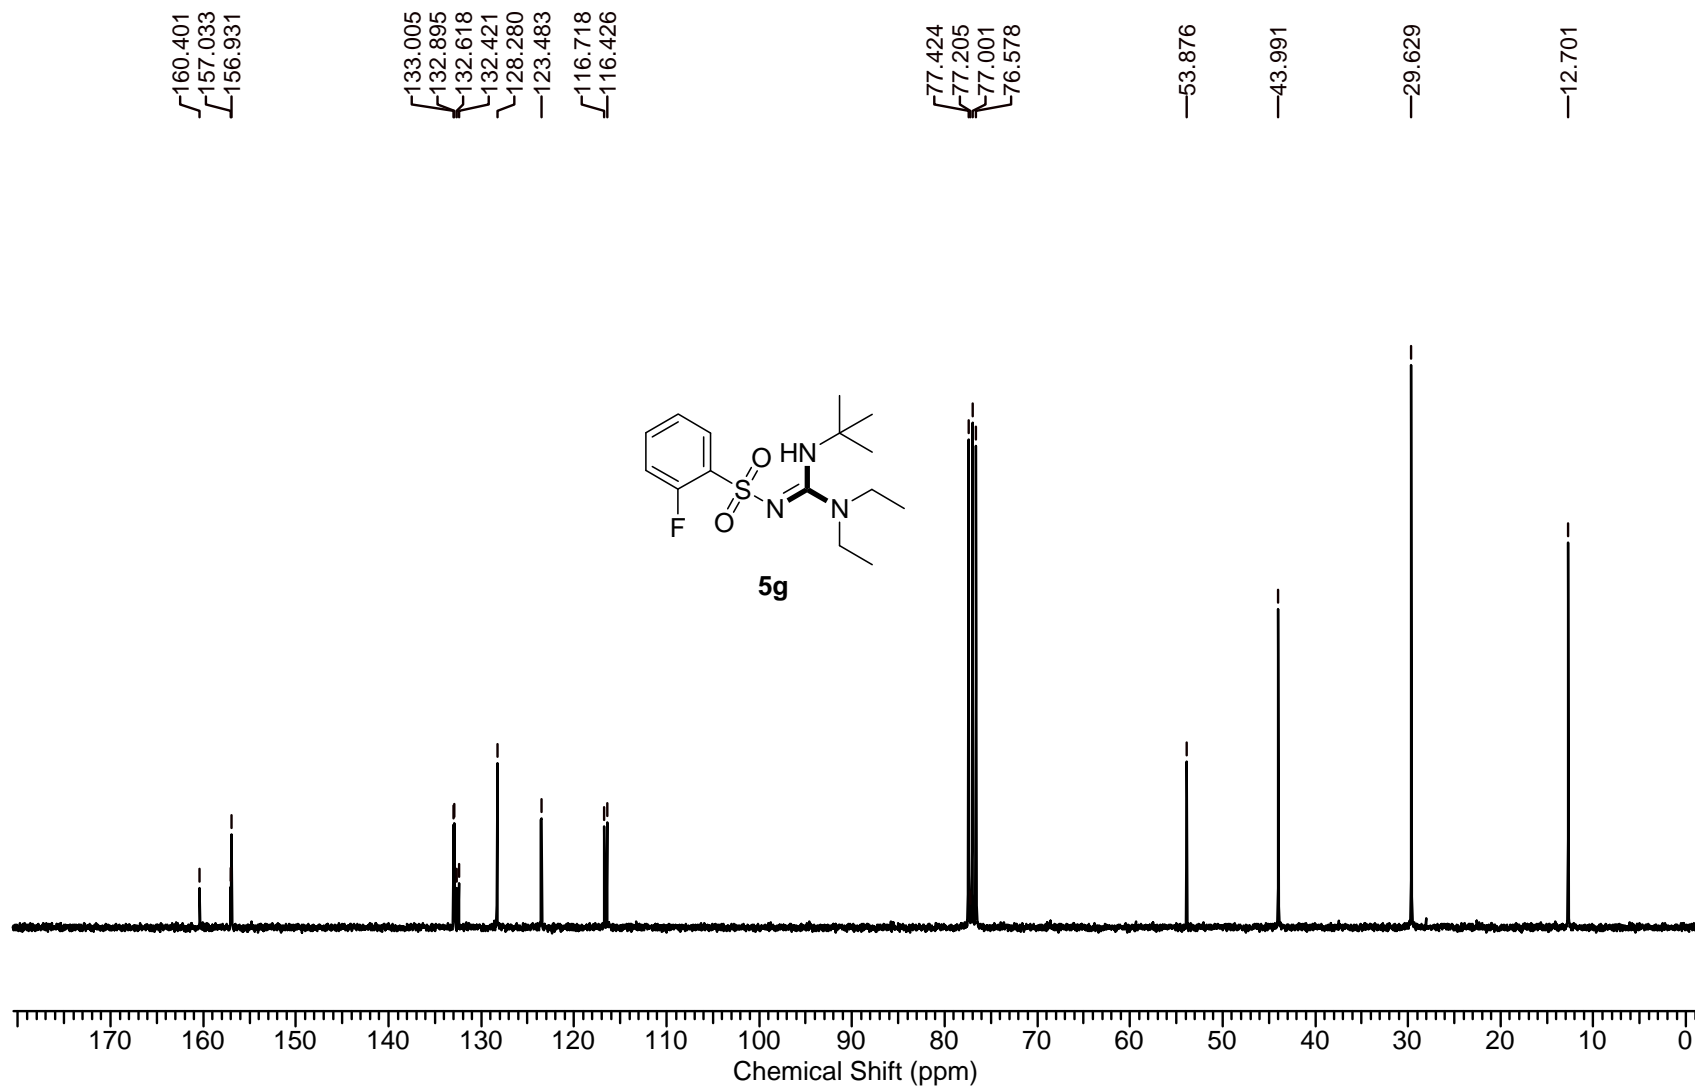

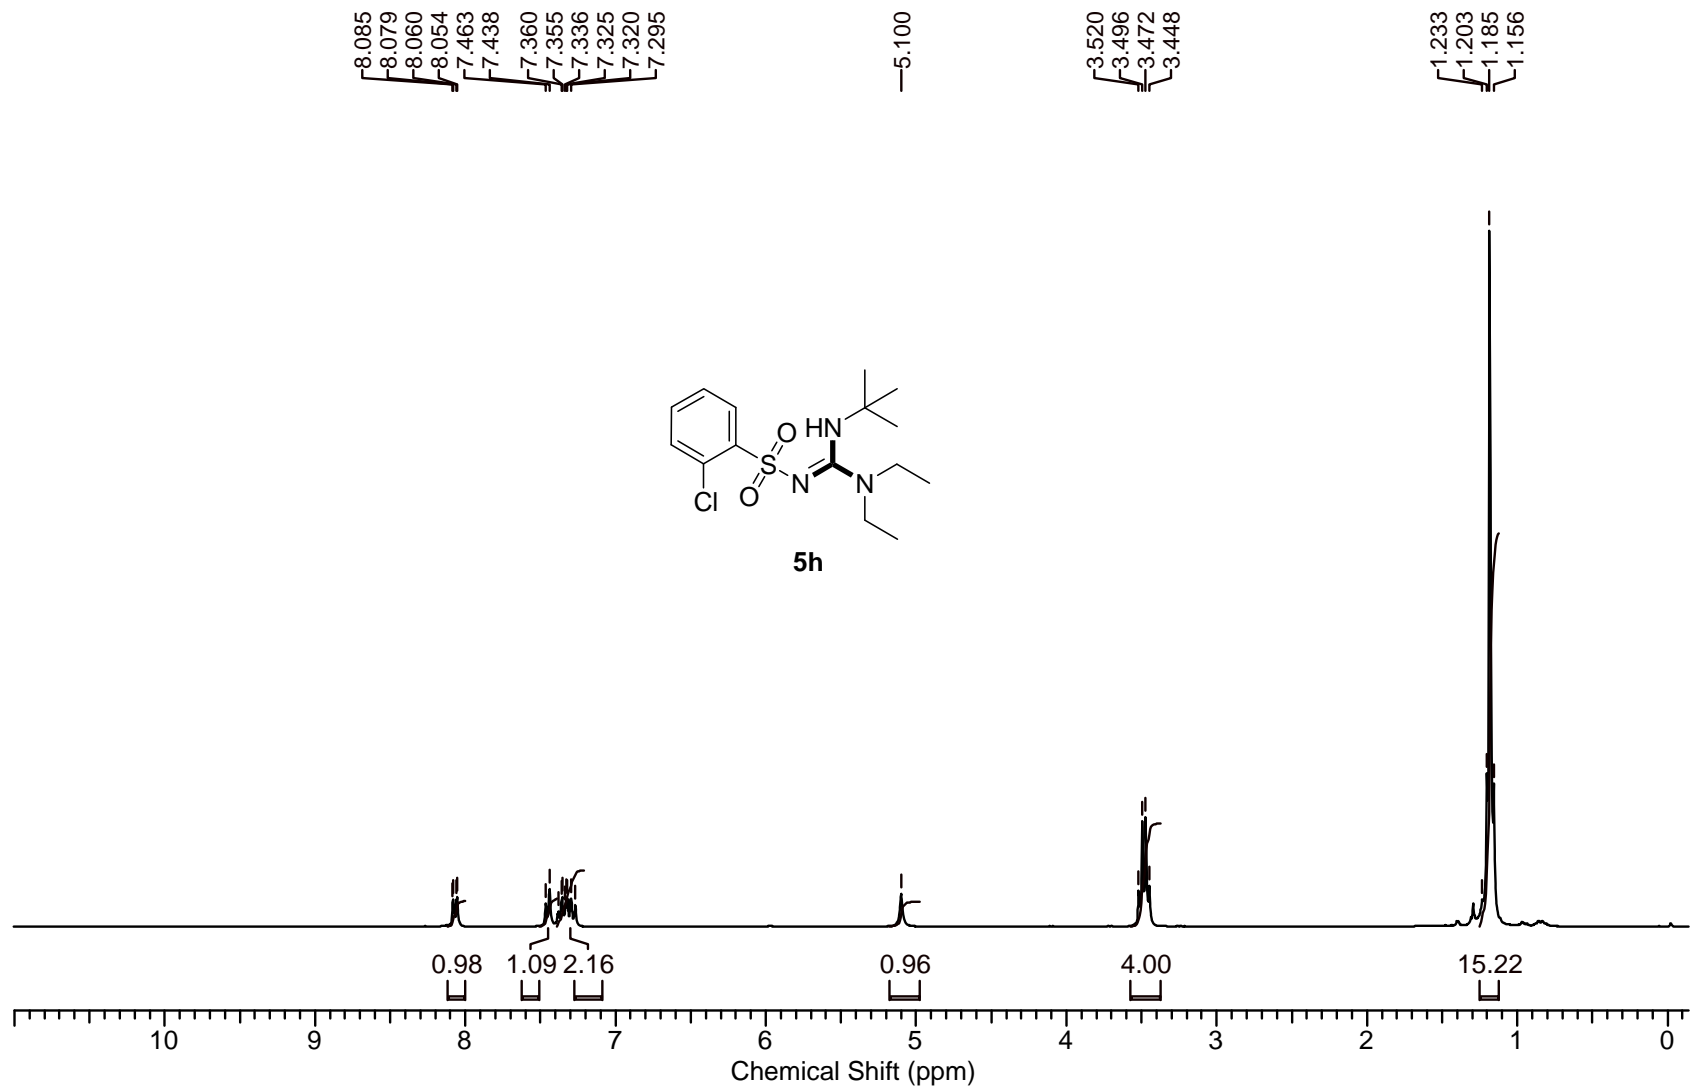

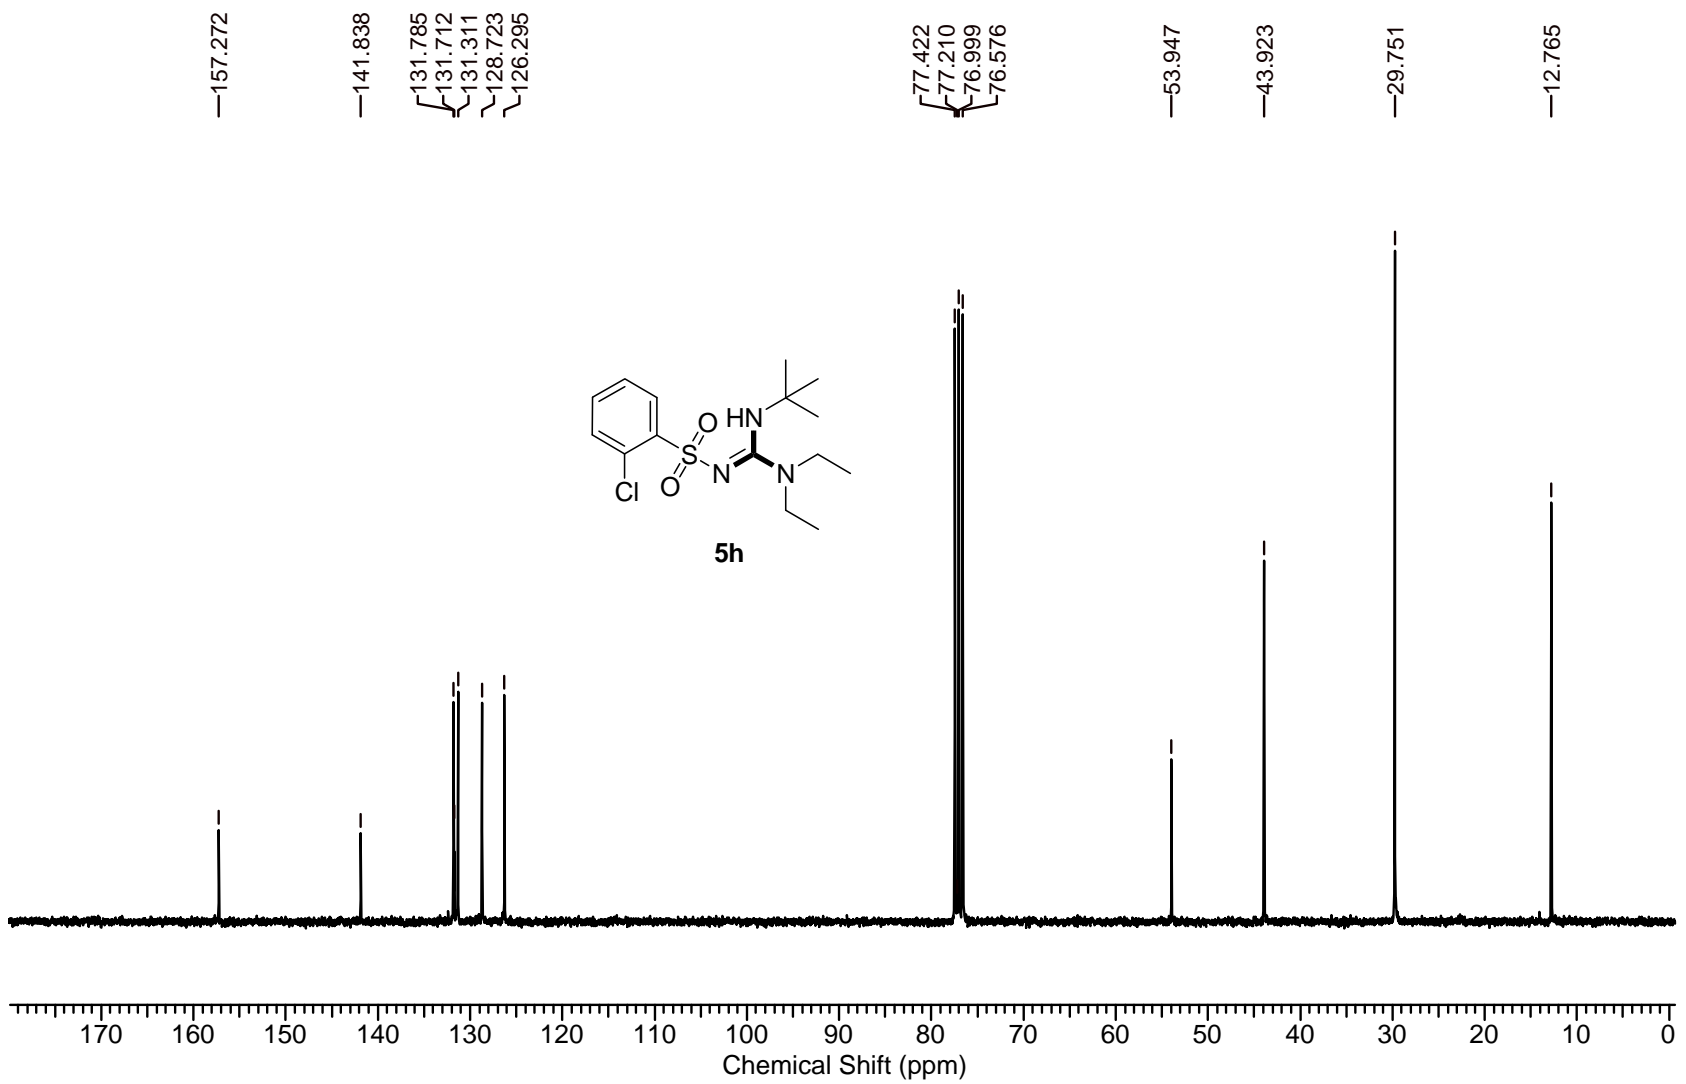

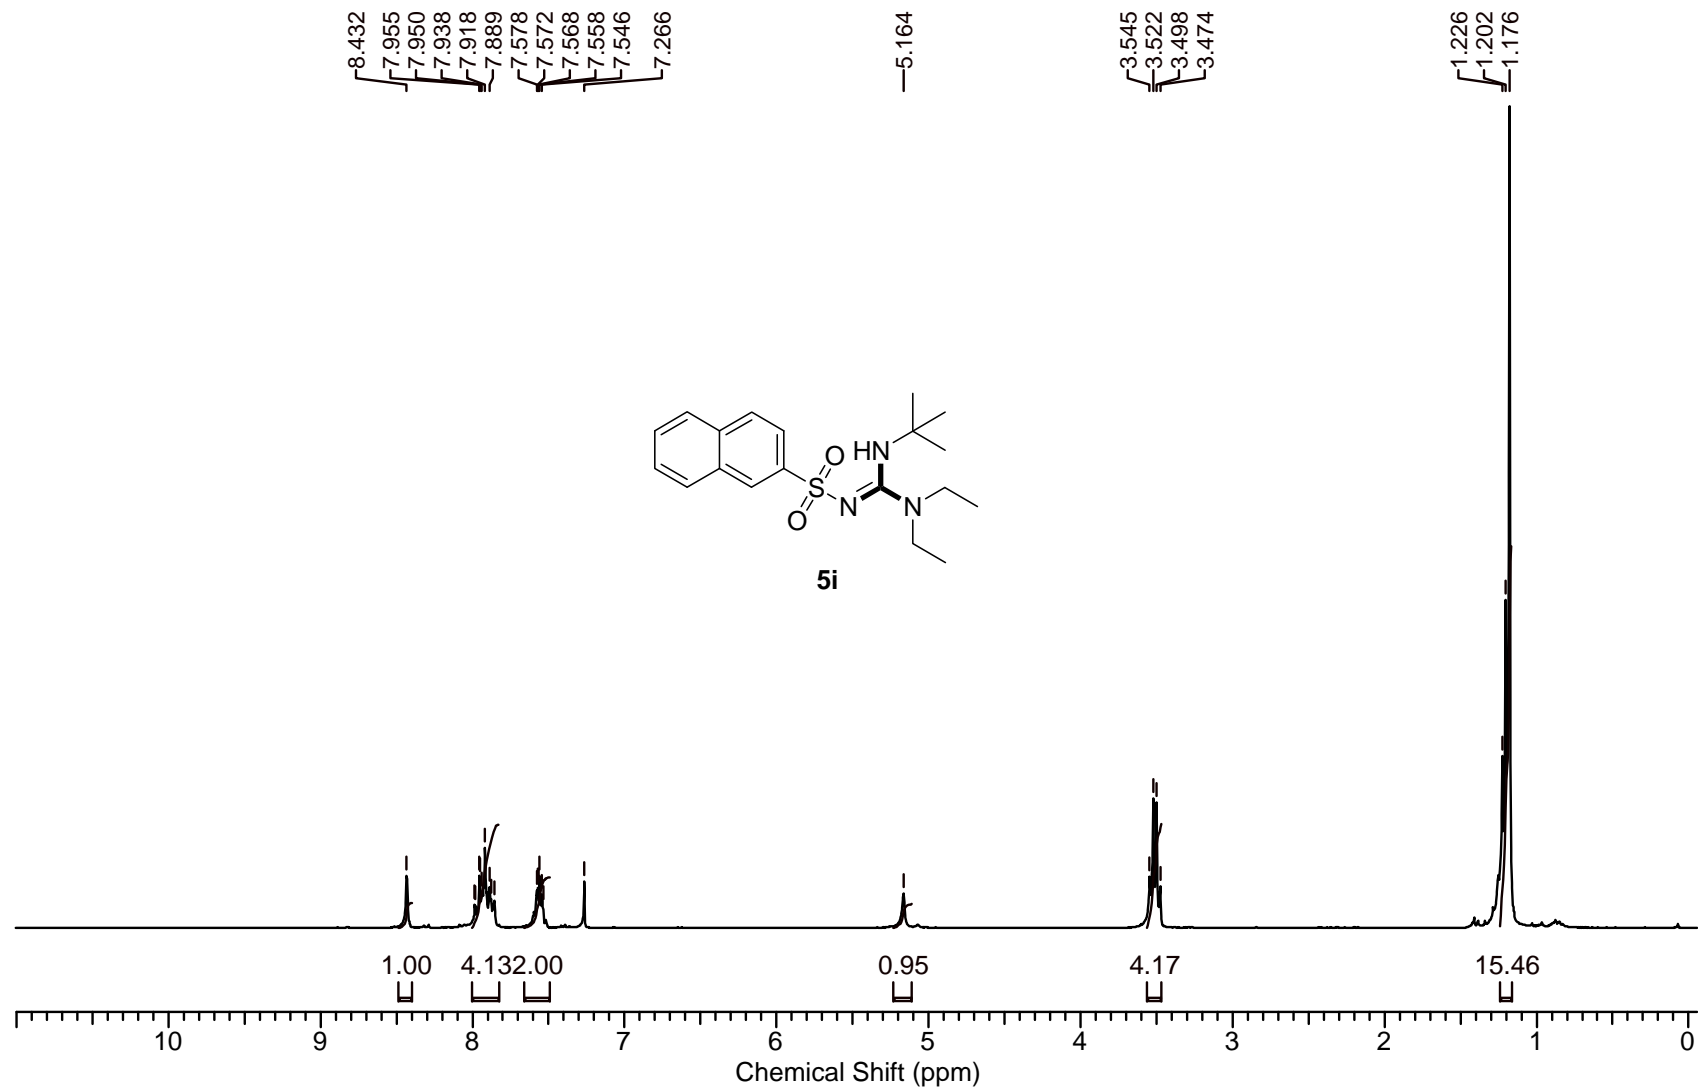

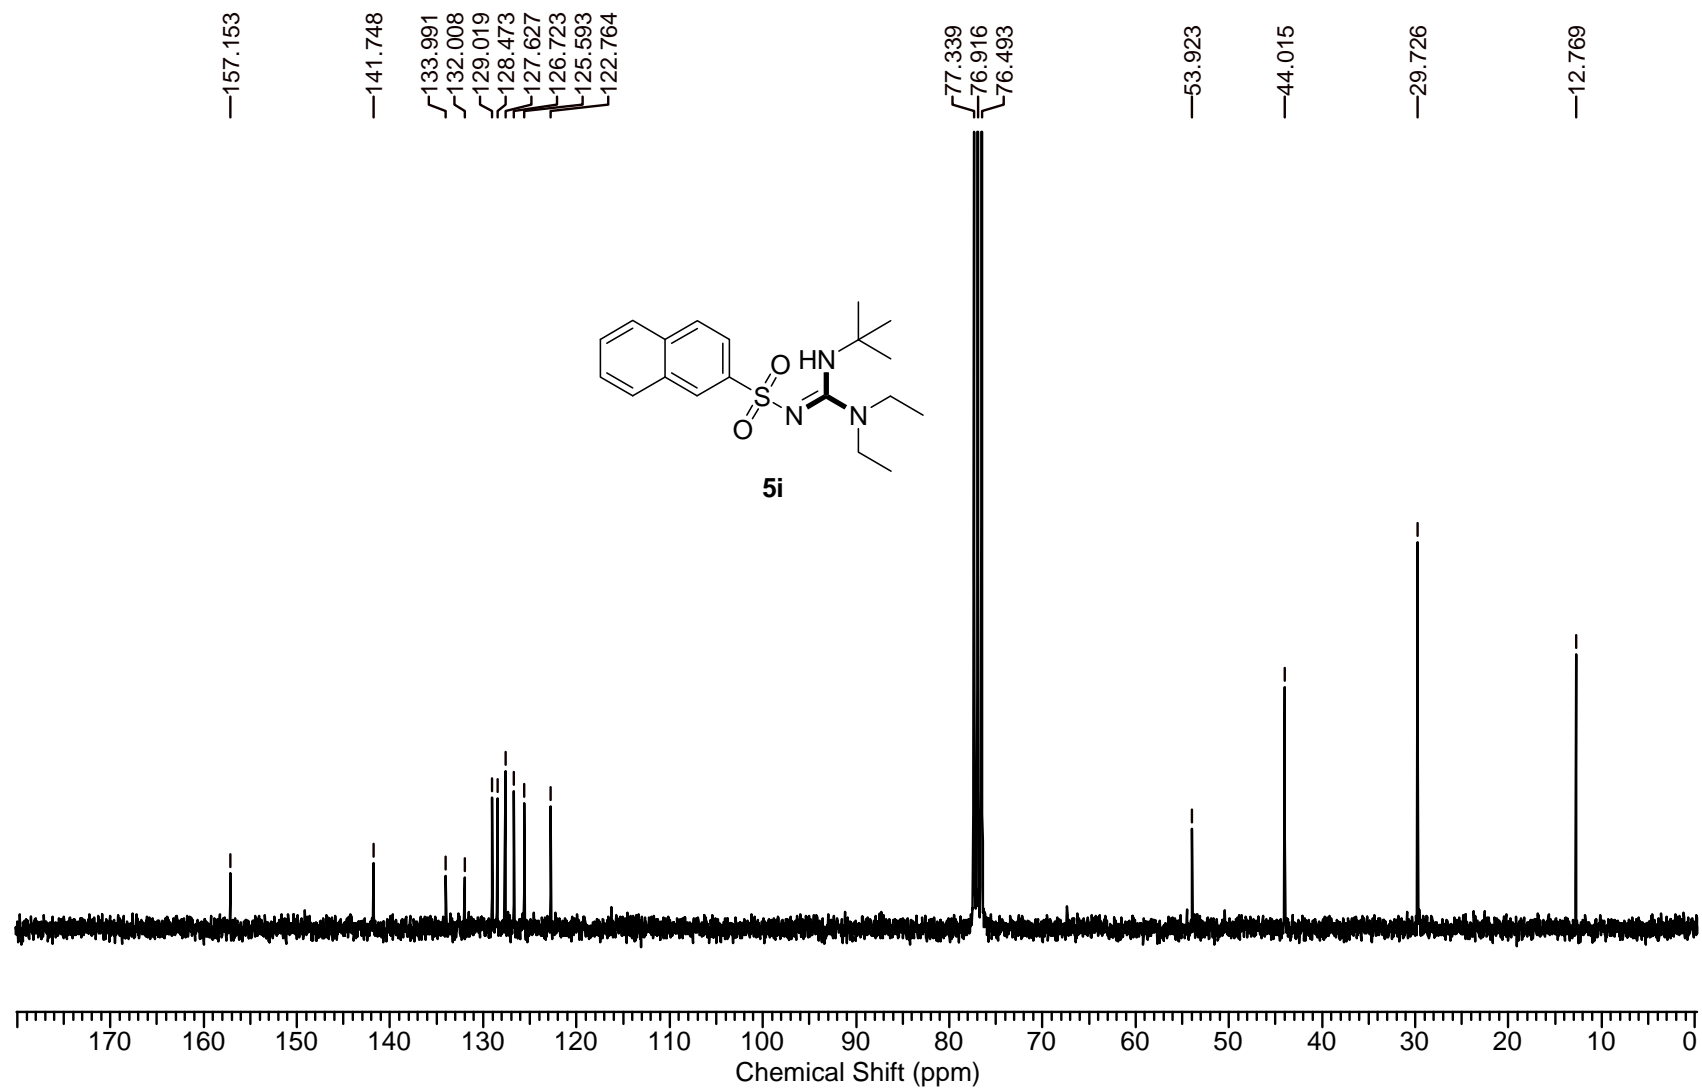

7.769  
7.743  
7.266  
7.232  
7.205  
6.628

3.303  
3.279  
3.255  
3.233  
3.085  
3.062  
3.044  
3.021  
2.373  
1.447  
1.434  
1.242  
1.112  
1.088  
1.077  
1.066  
0.857  
0.838  
0.011

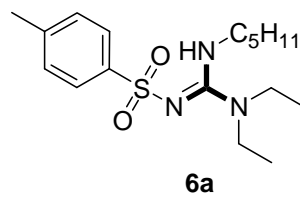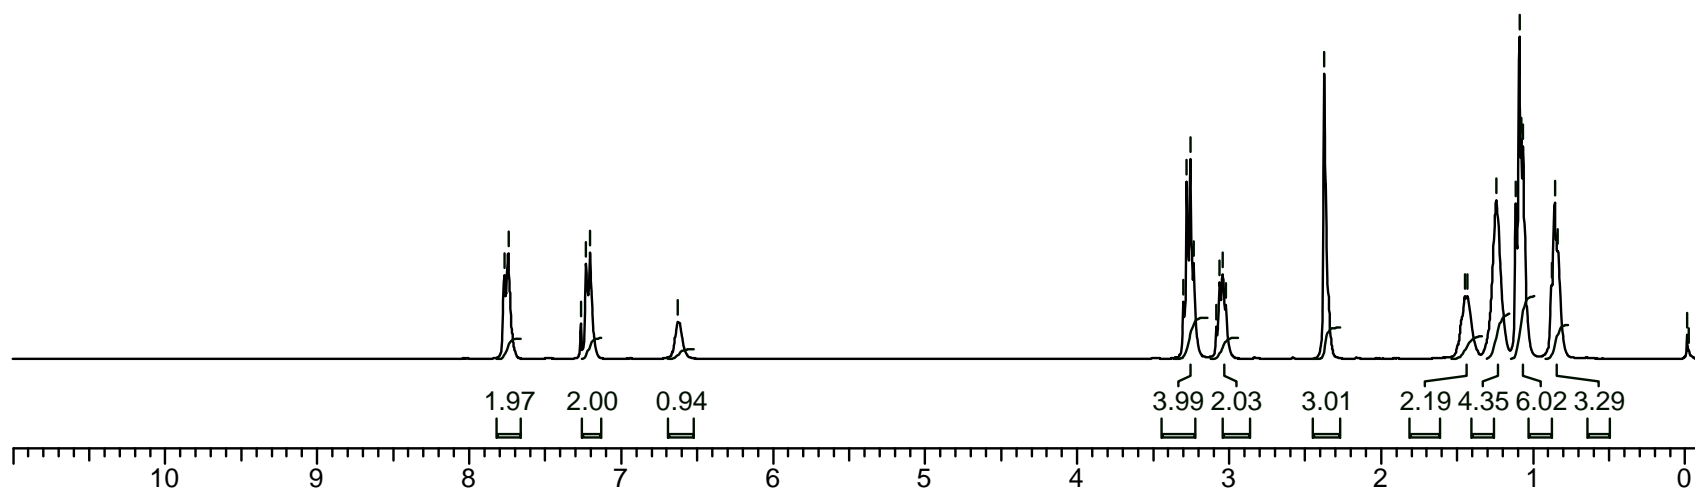

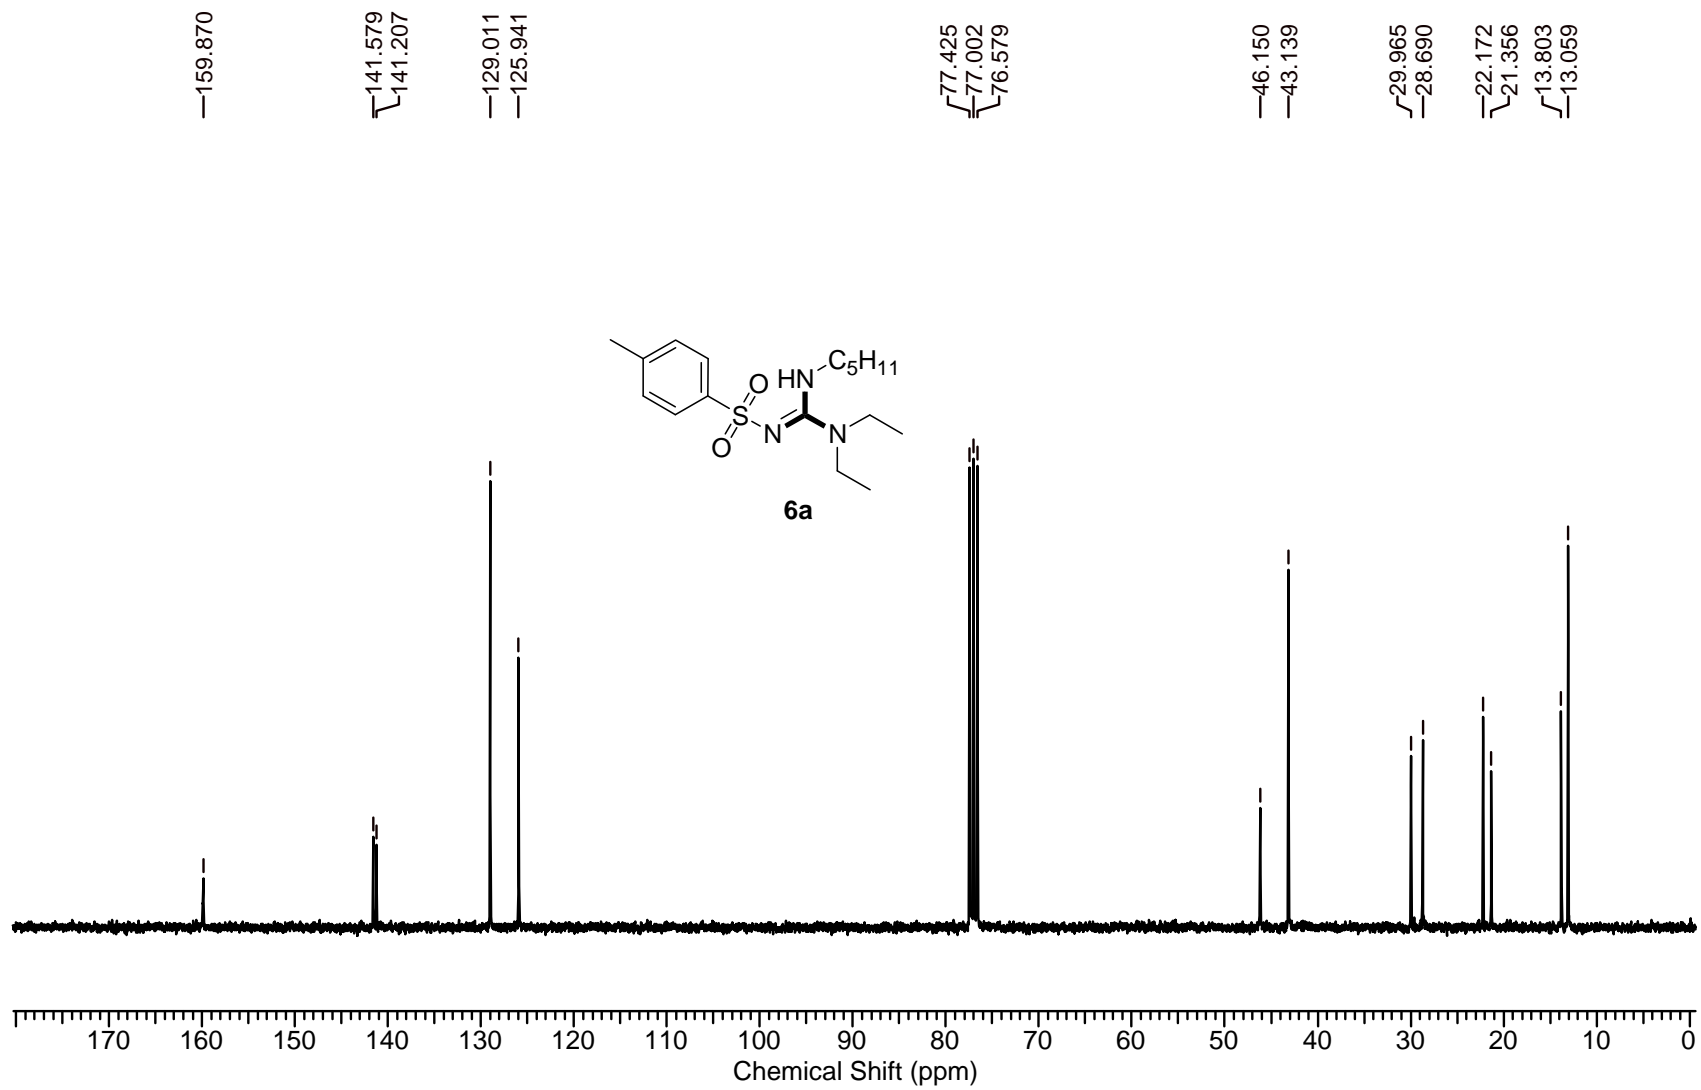

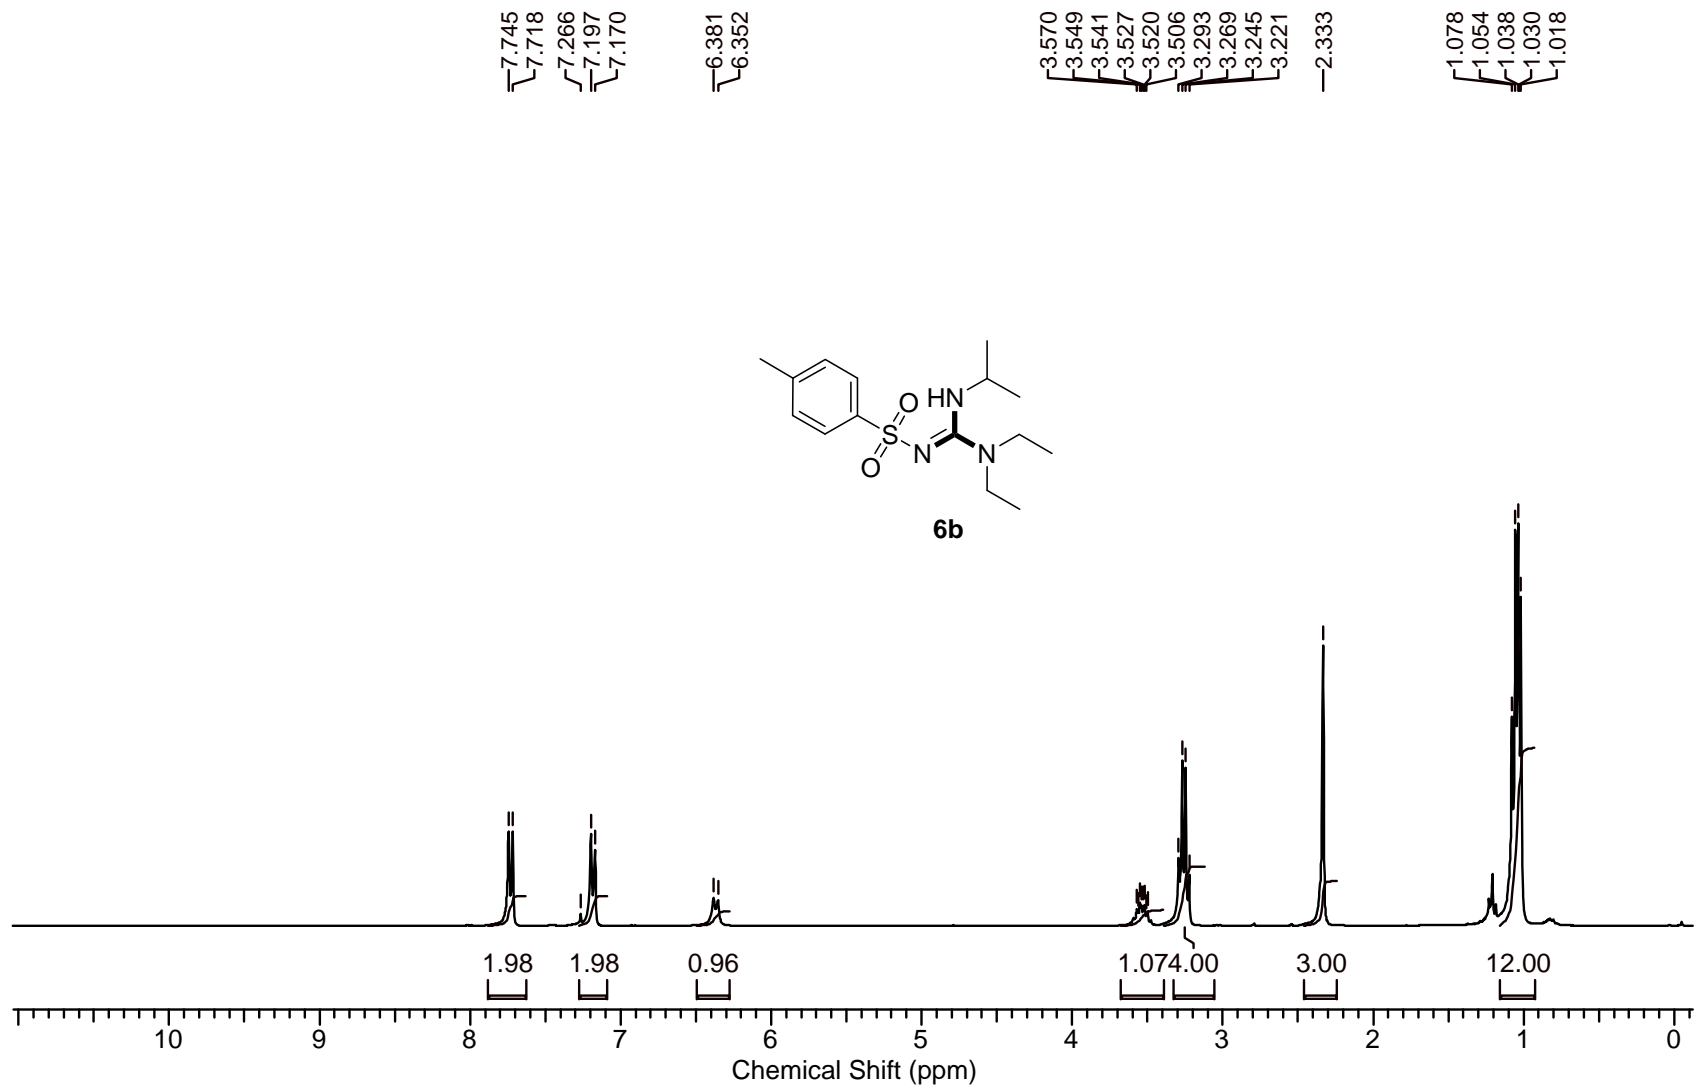



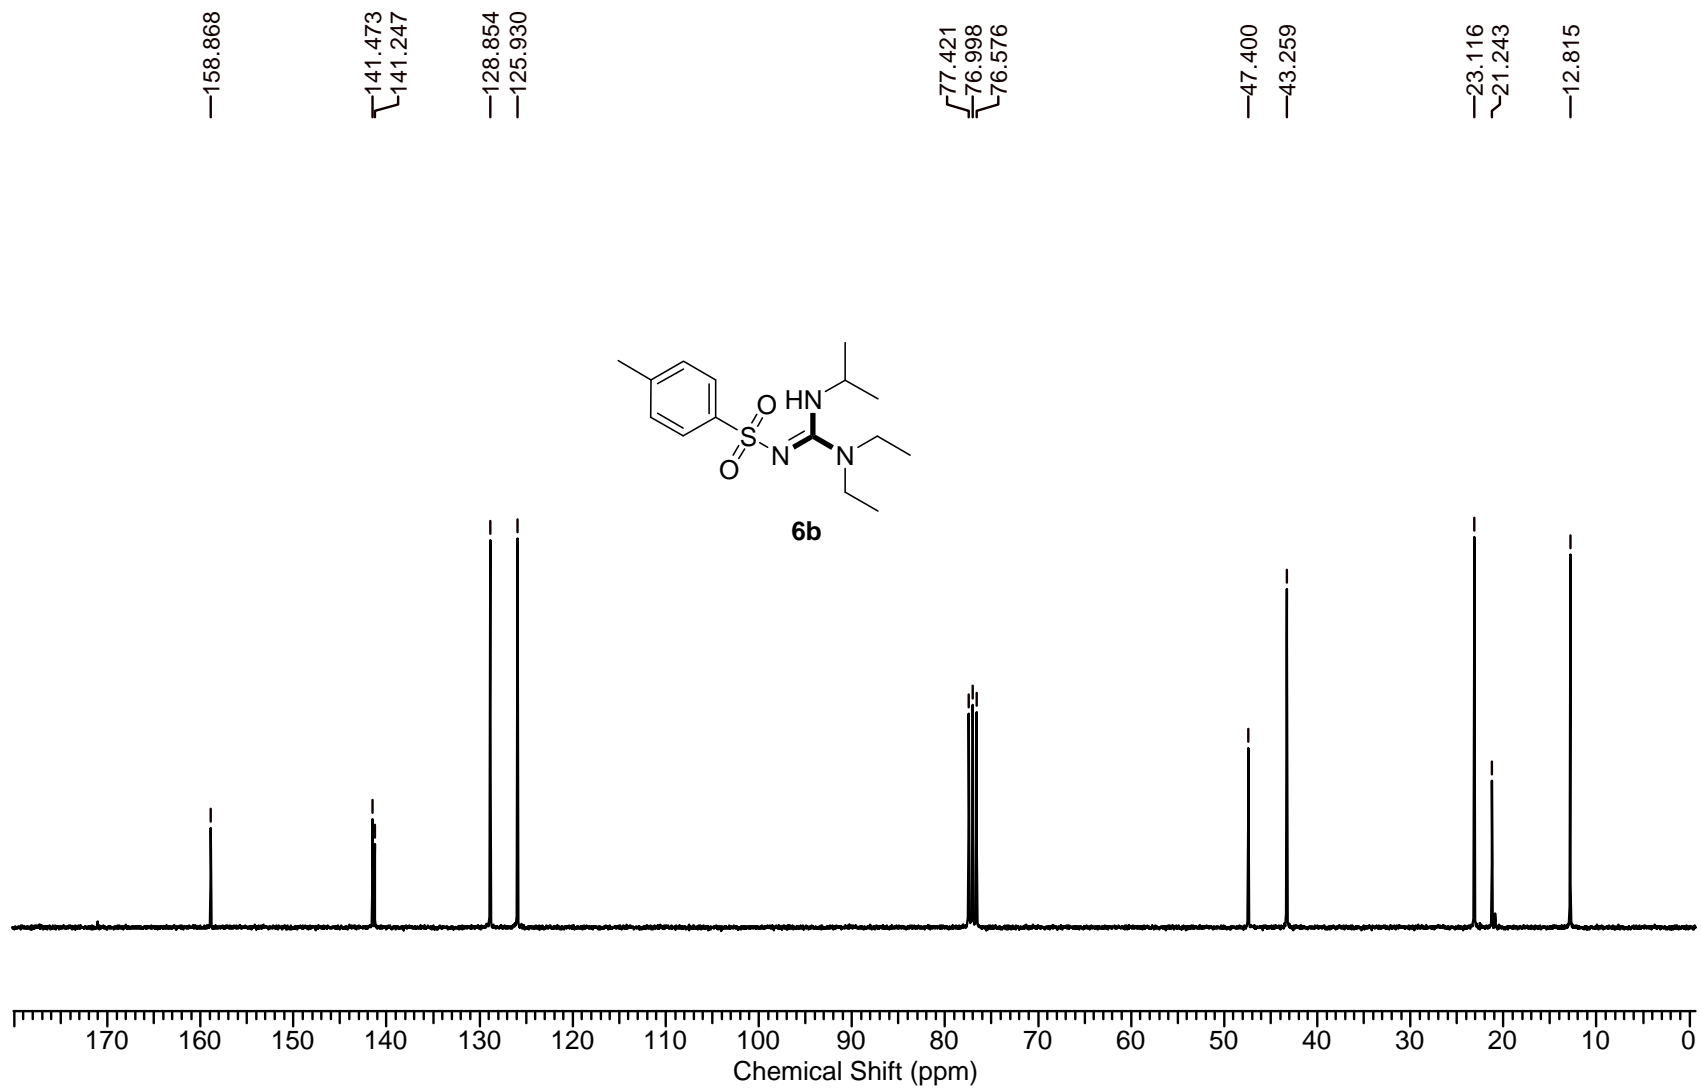

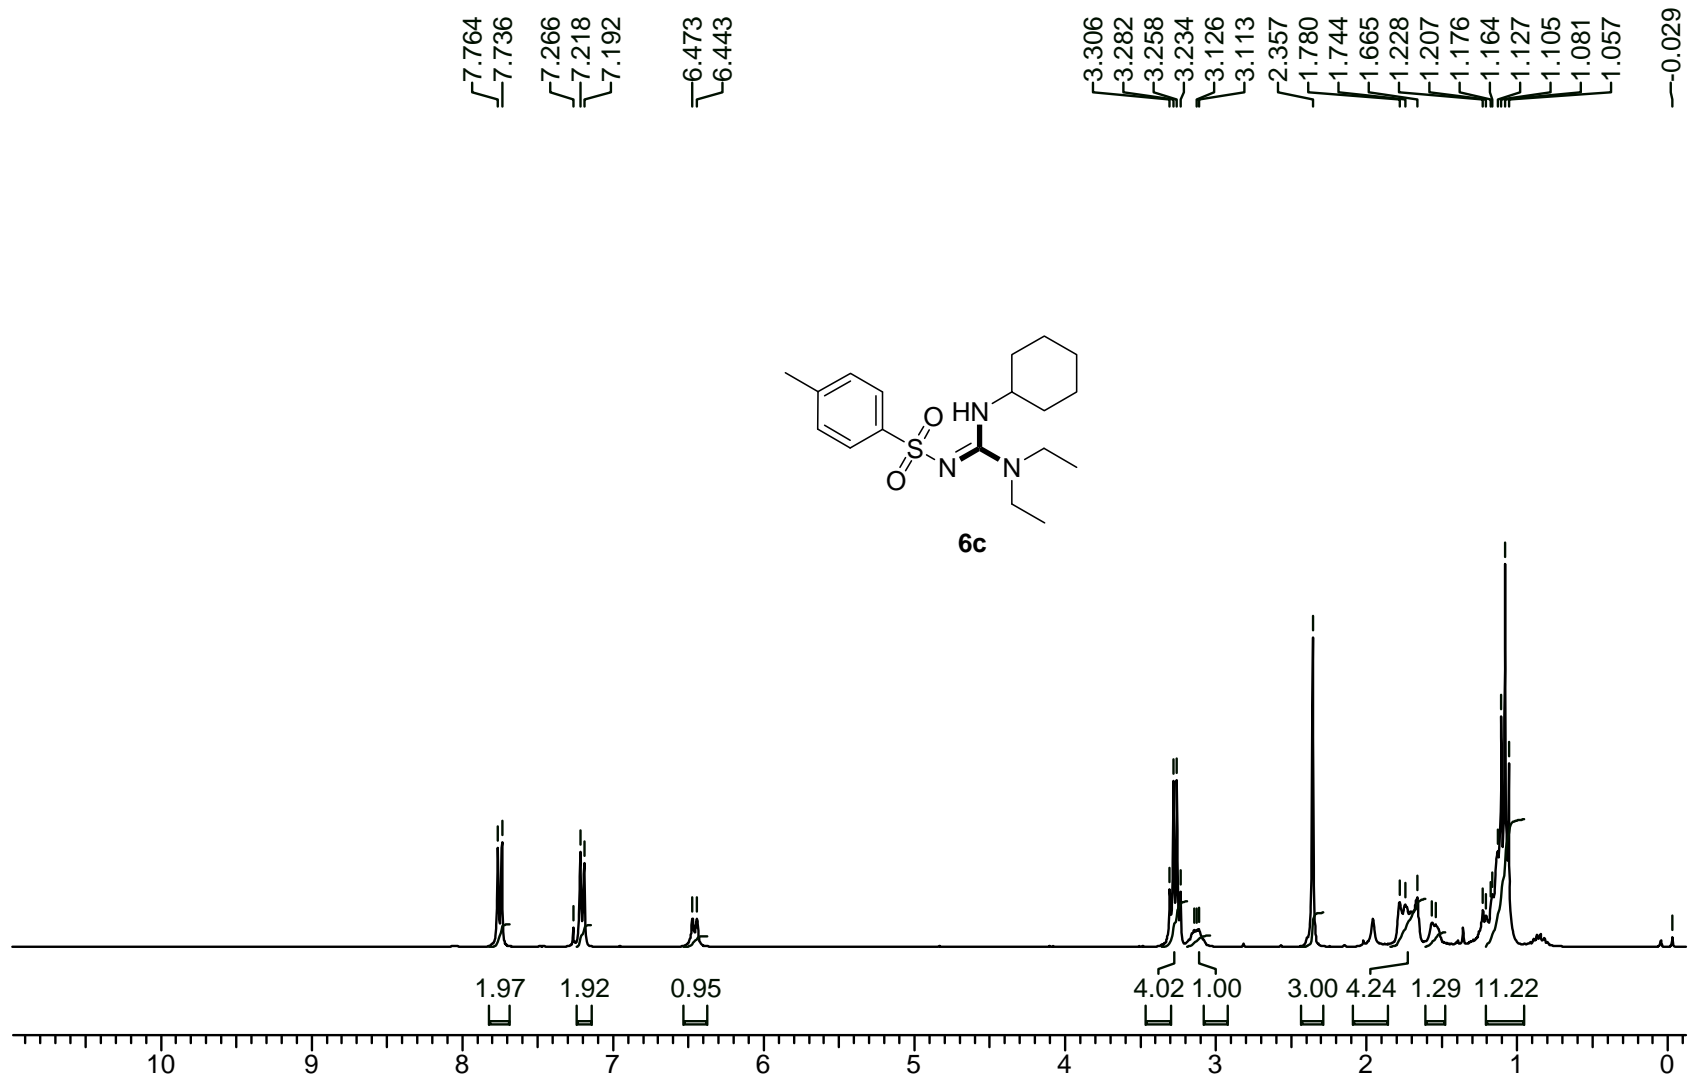

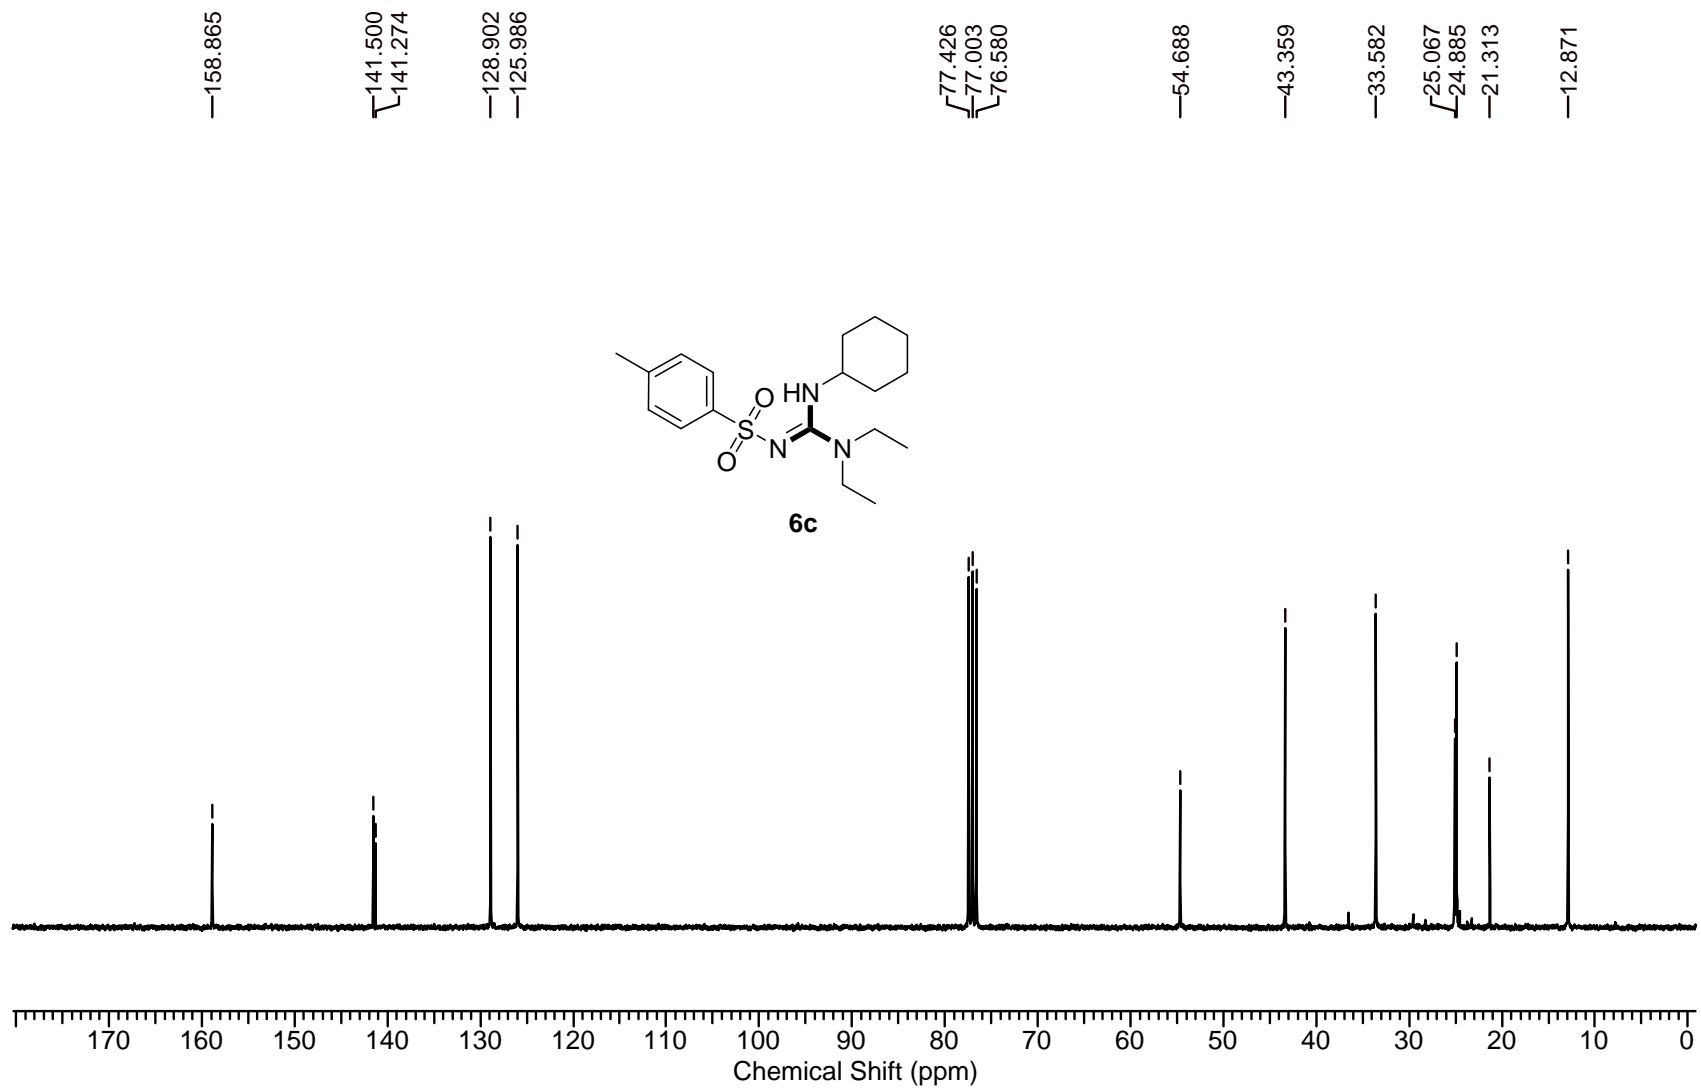

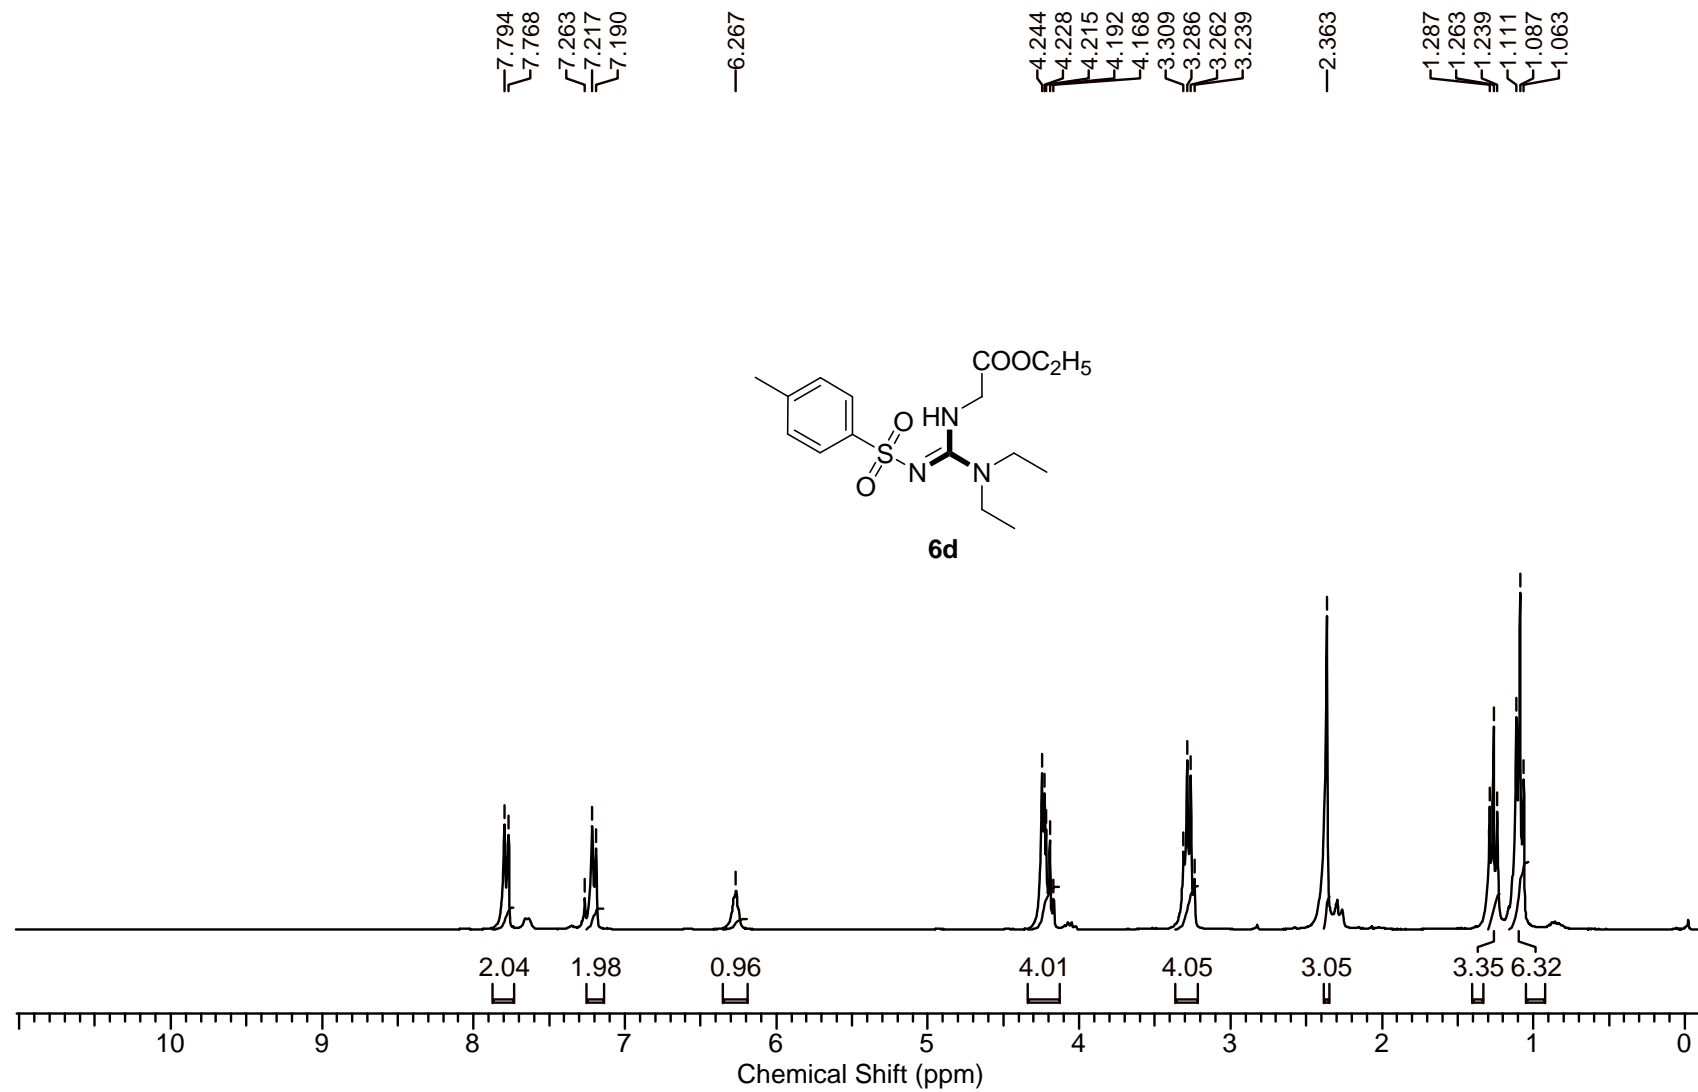

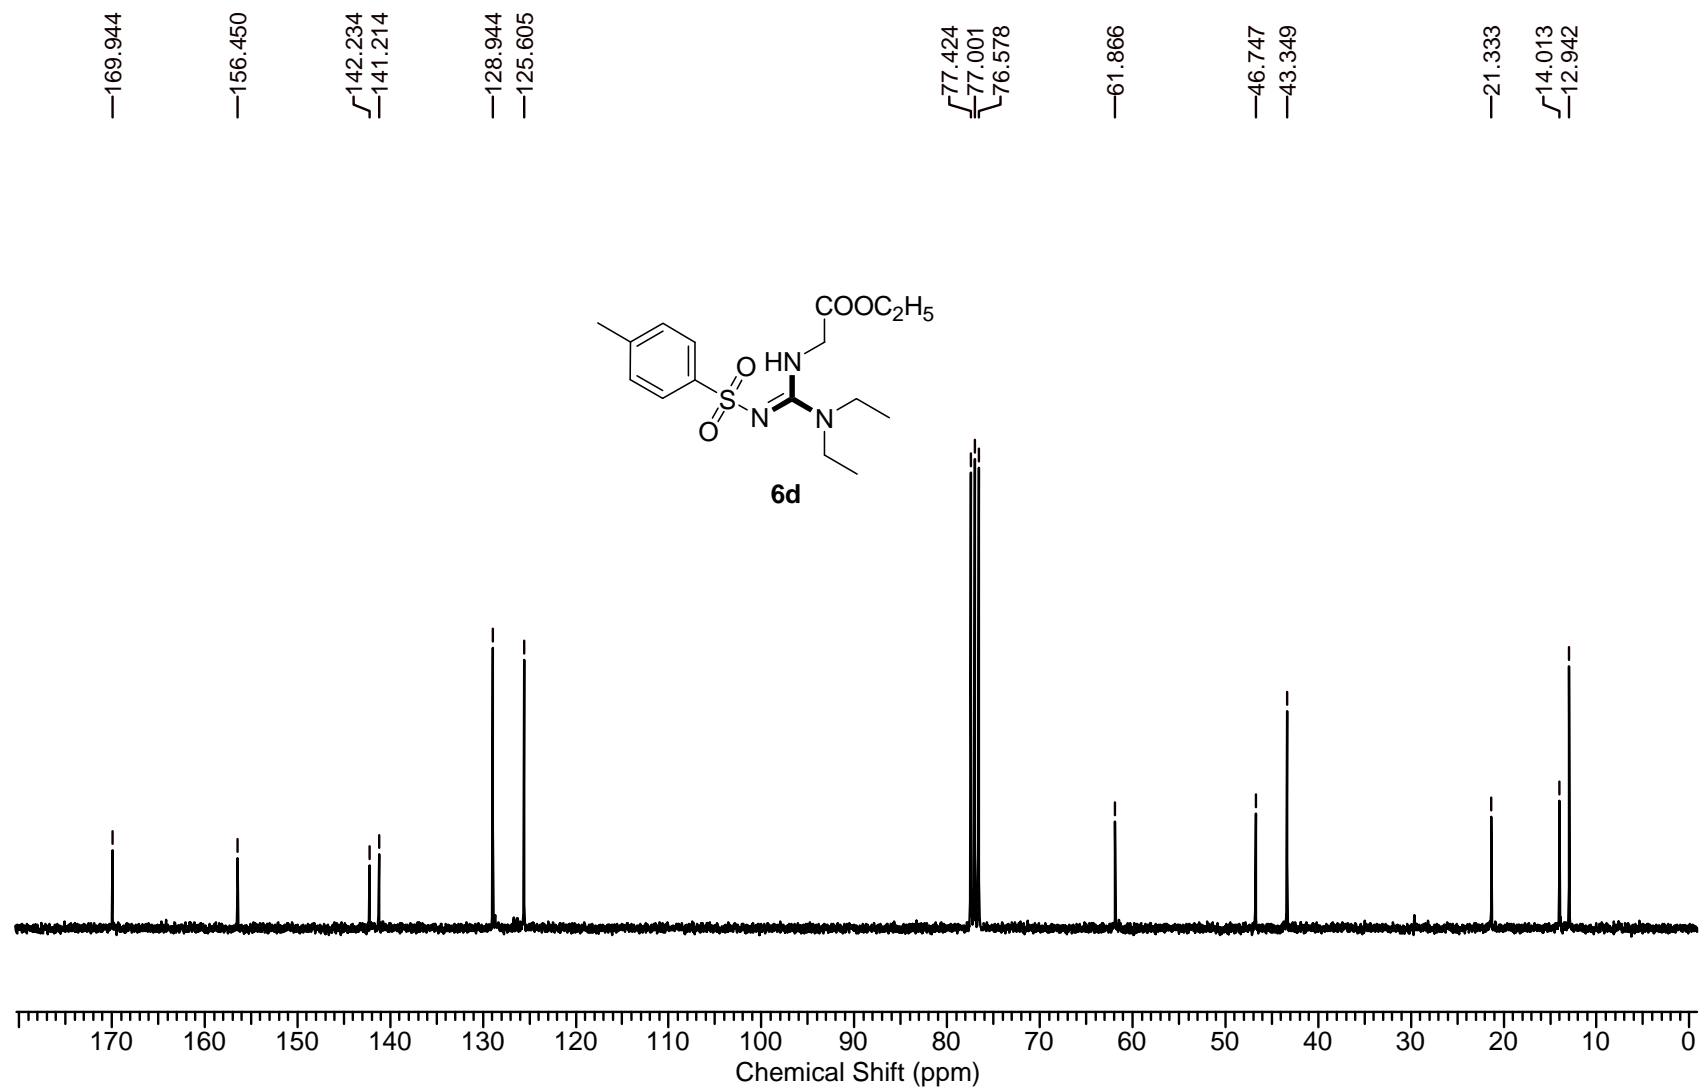

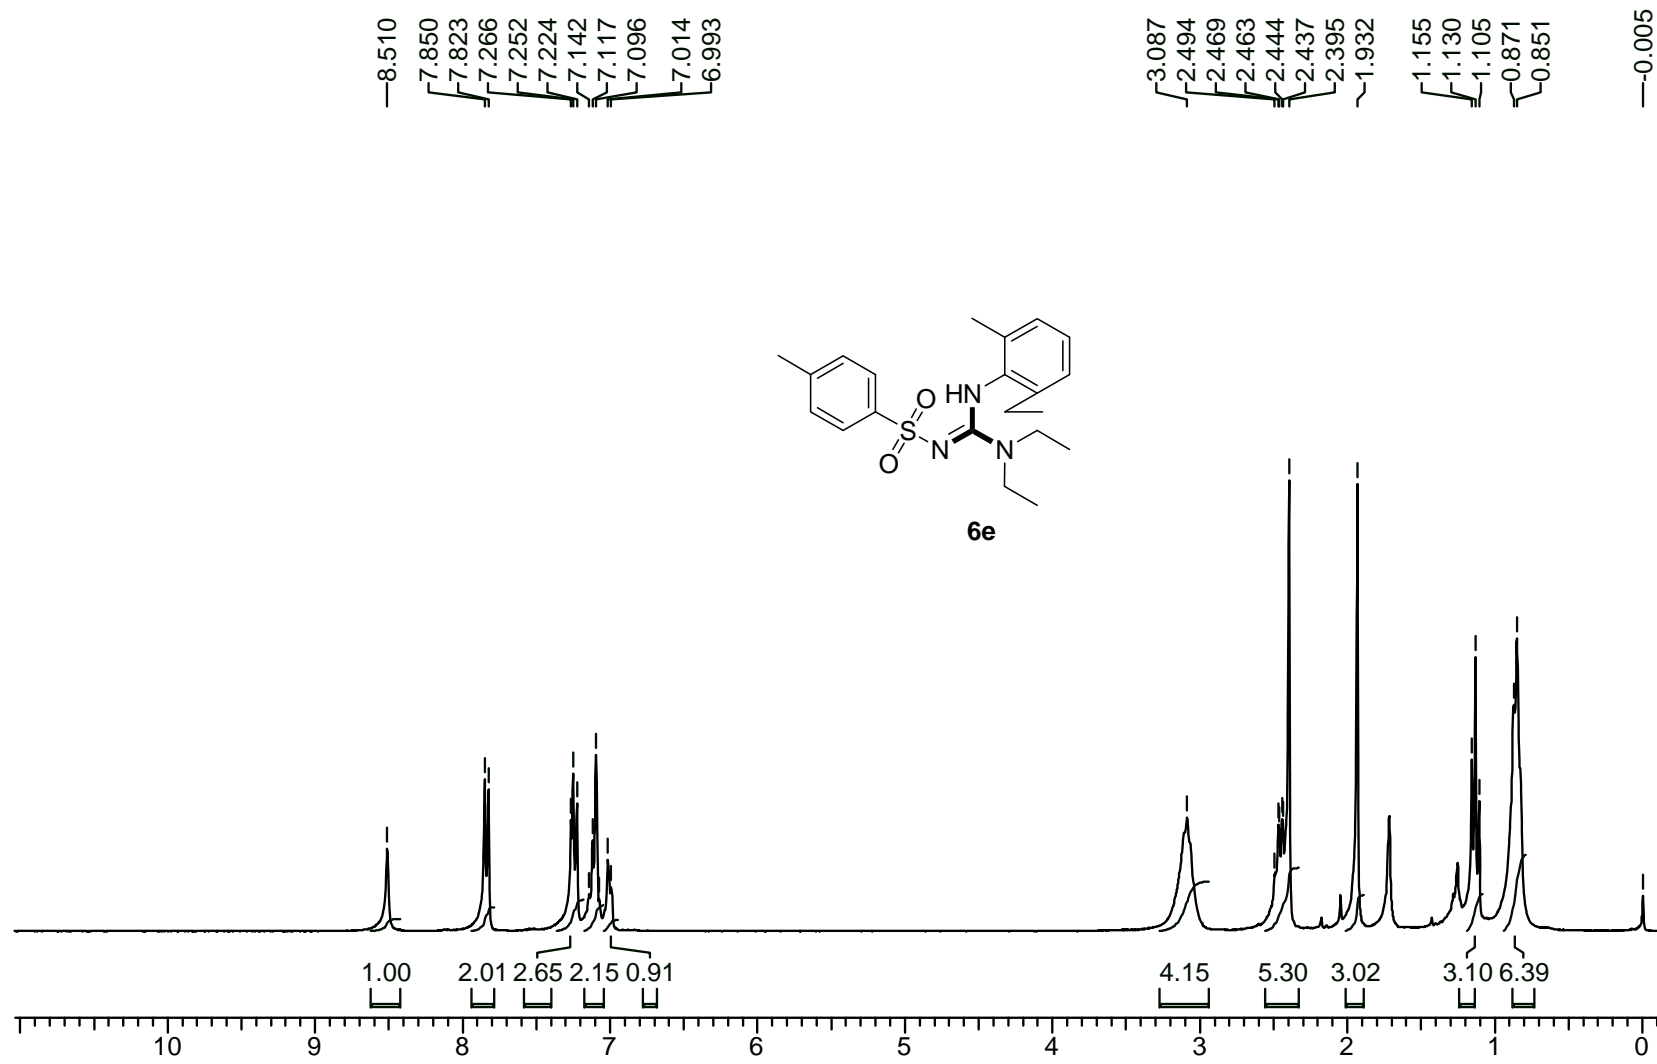

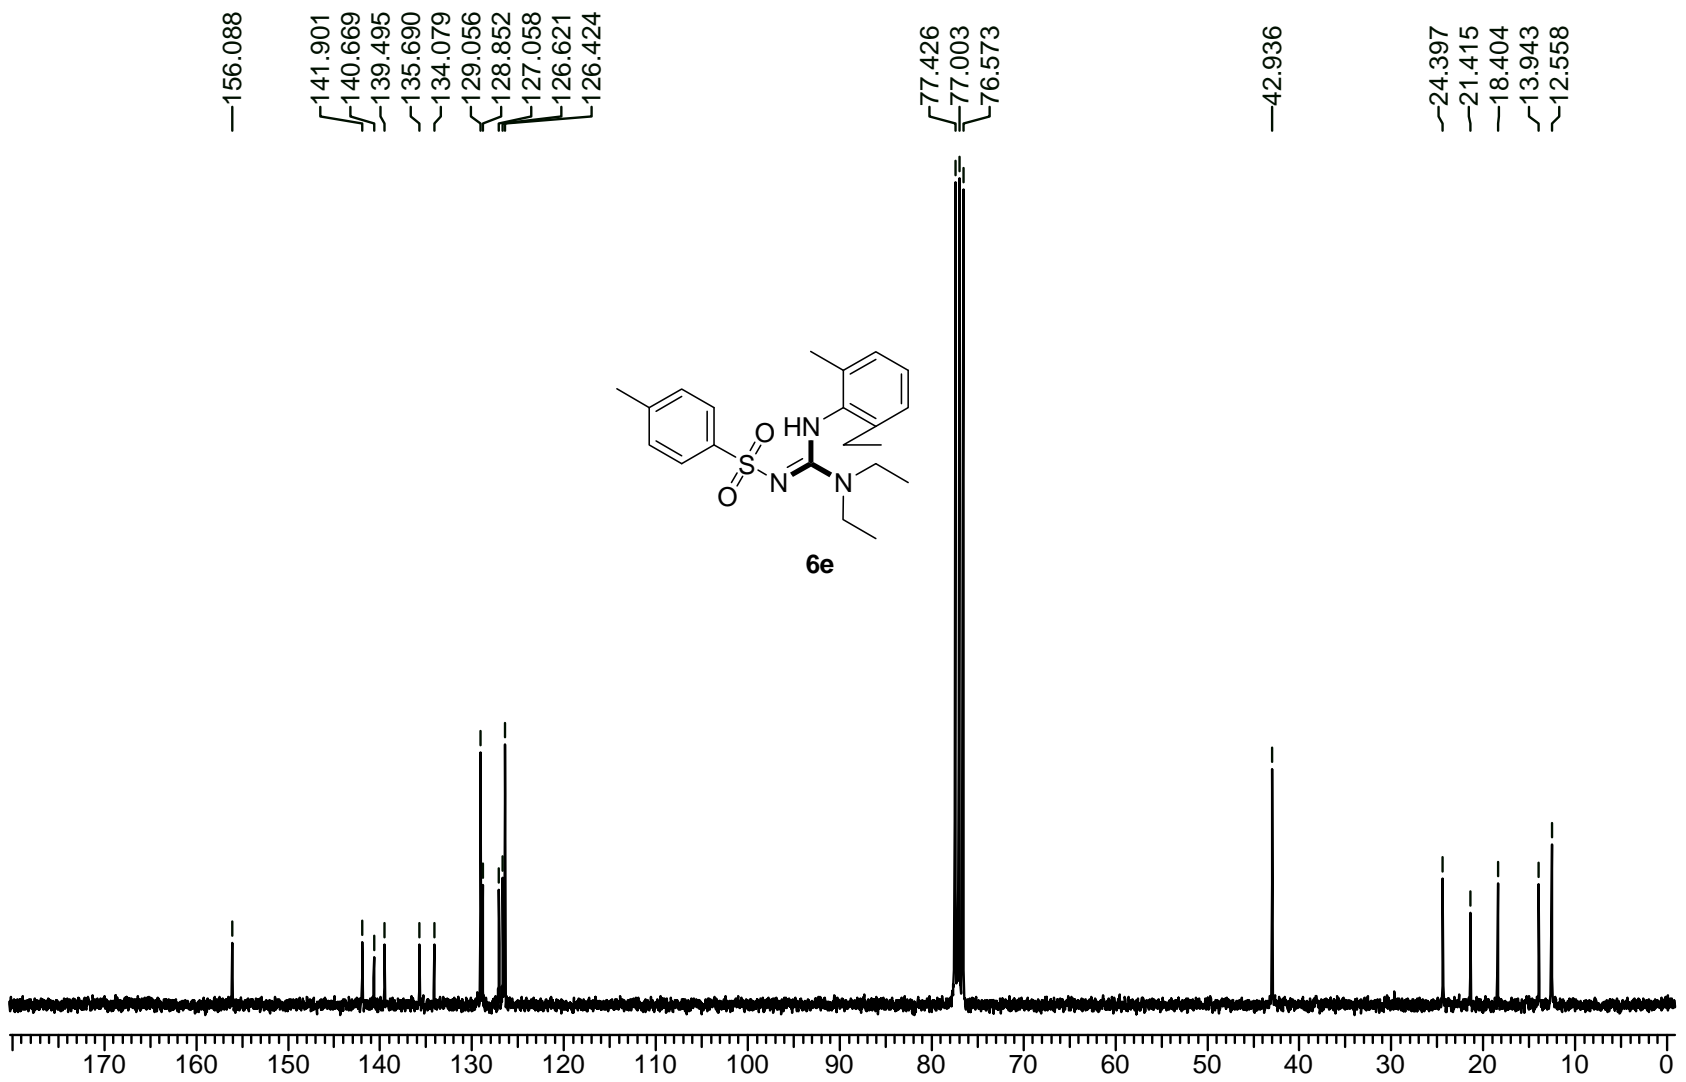

7.886  
7.882  
7.870  
7.857  
7.403  
7.387

5.280

3.371  
3.347  
3.322

1.529  
1.506  
1.480  
1.457  
1.294  
1.268  
1.243  
1.219  
1.161  
0.886  
0.861  
0.837

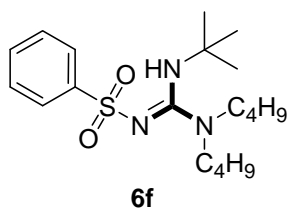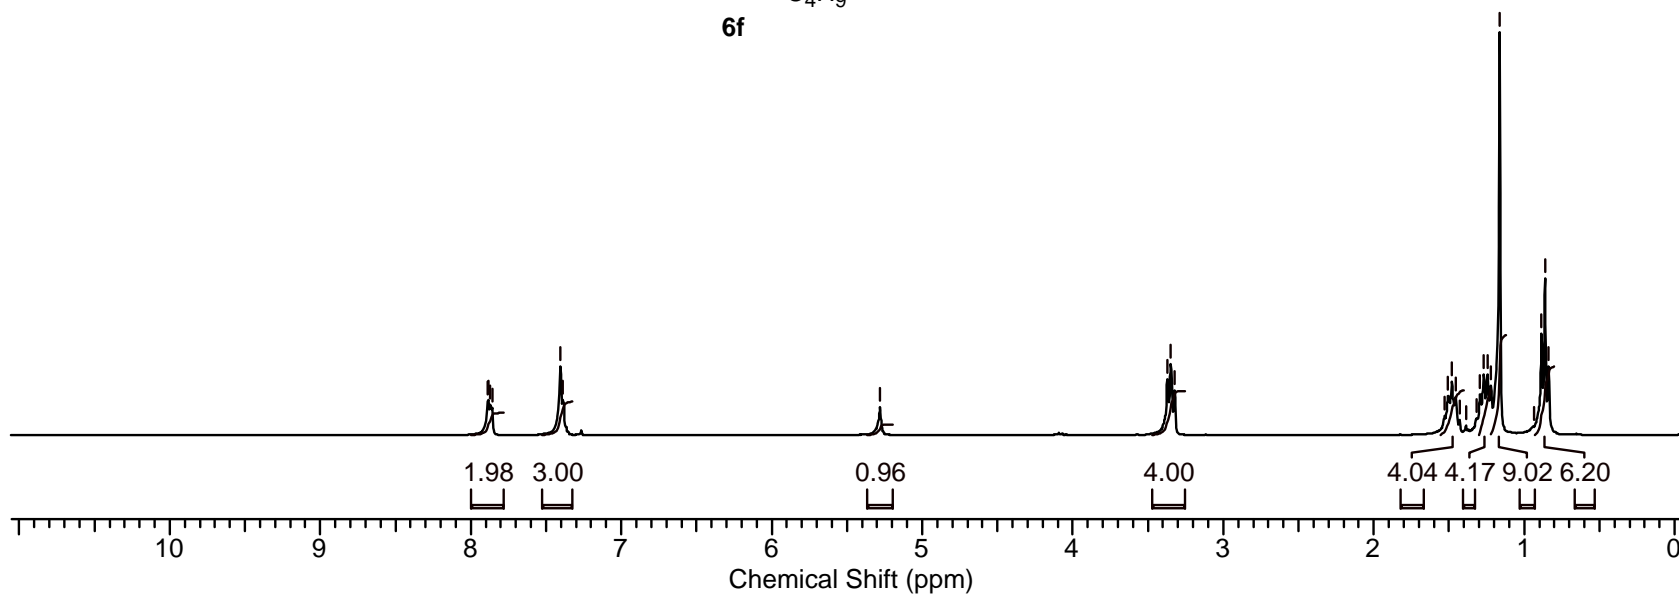



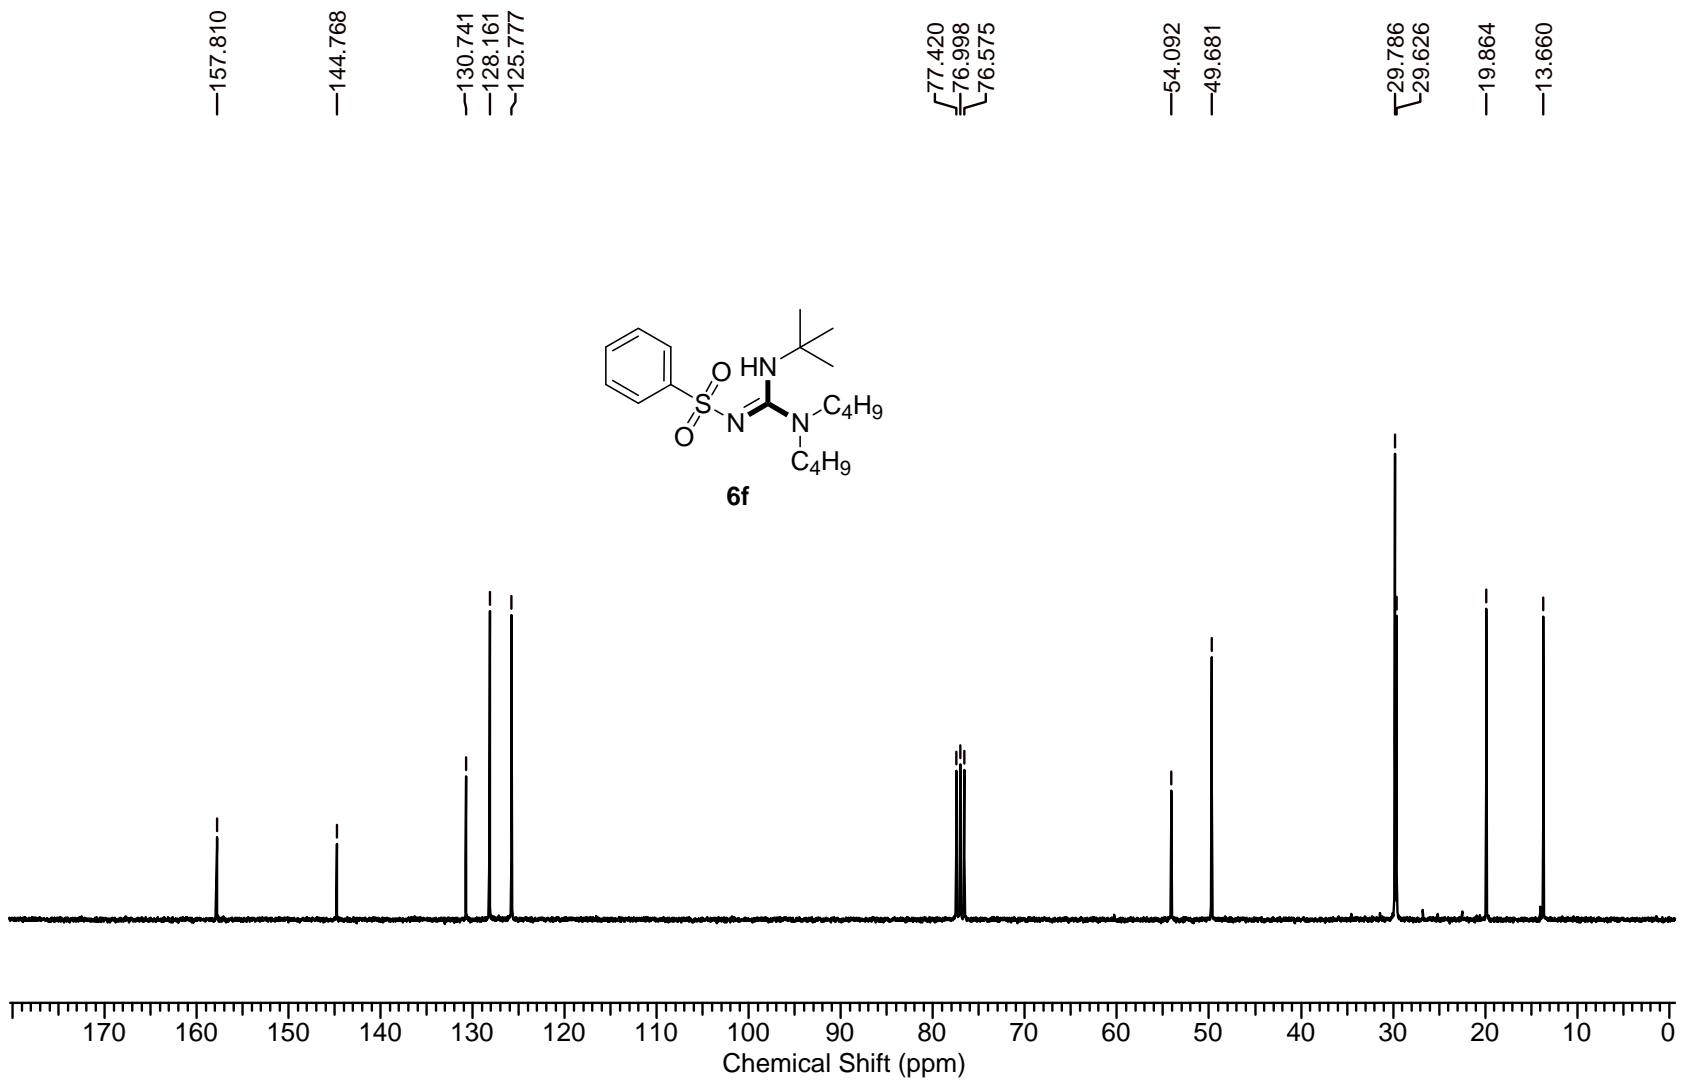

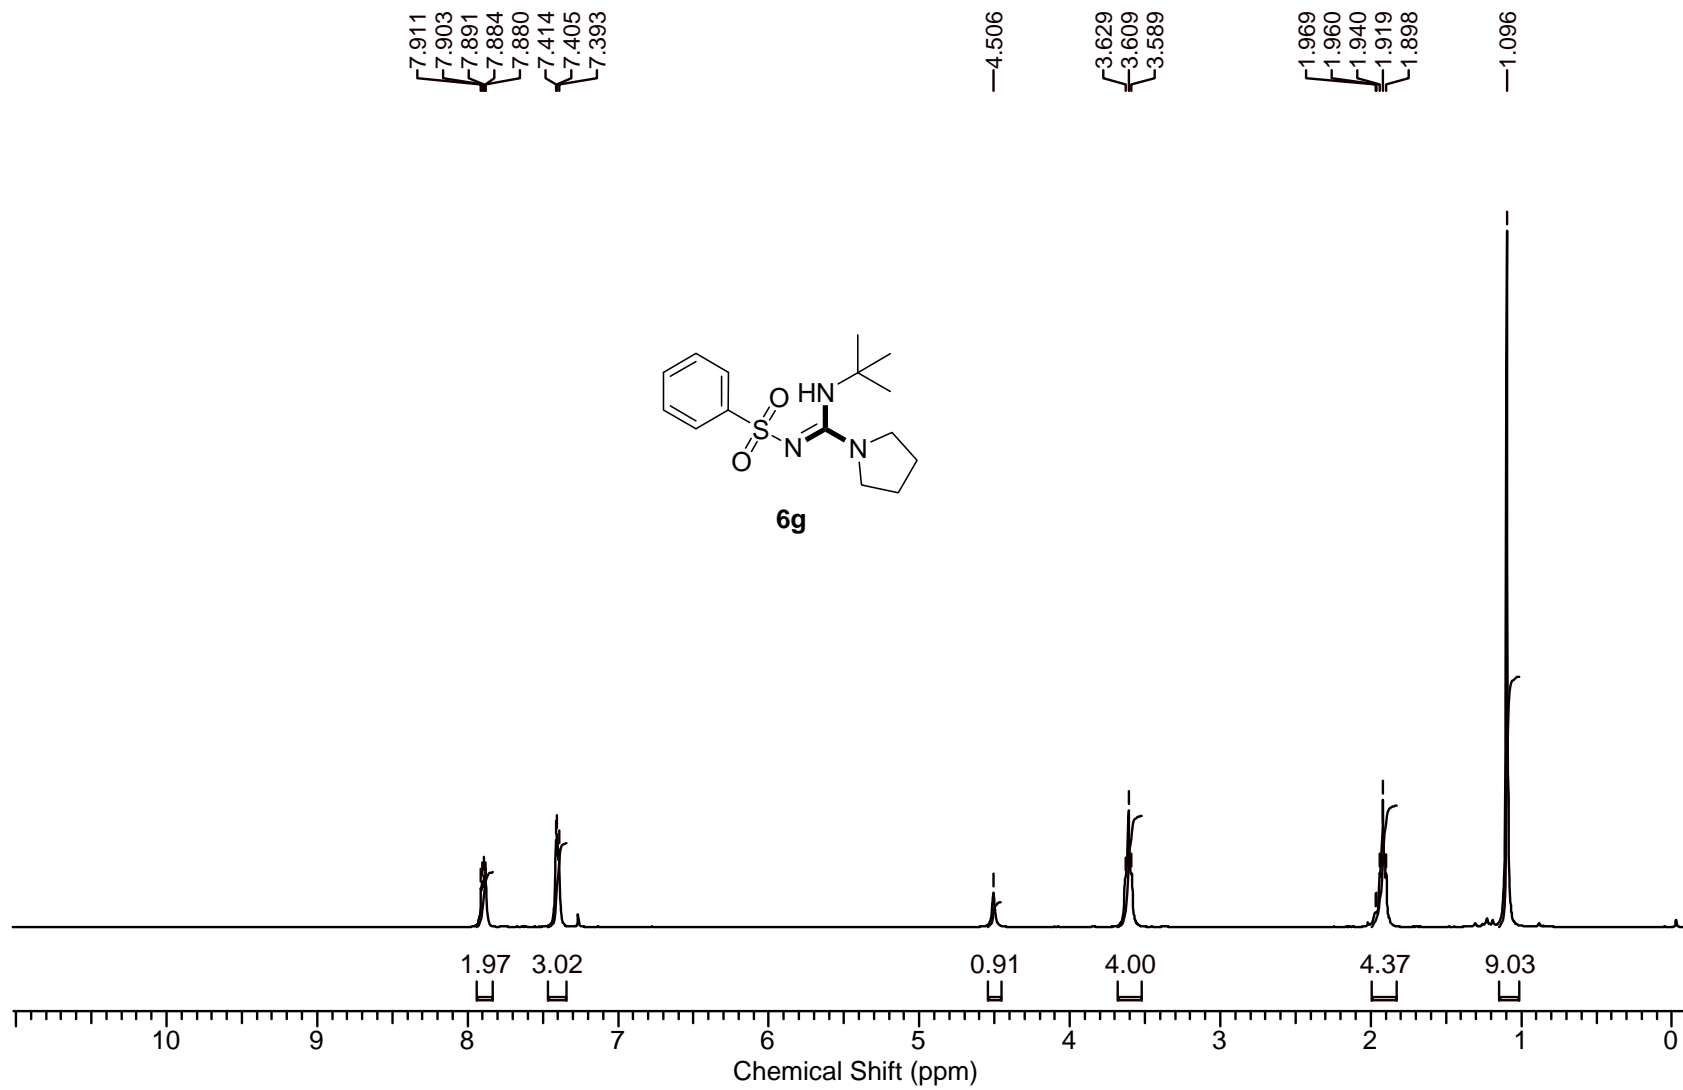

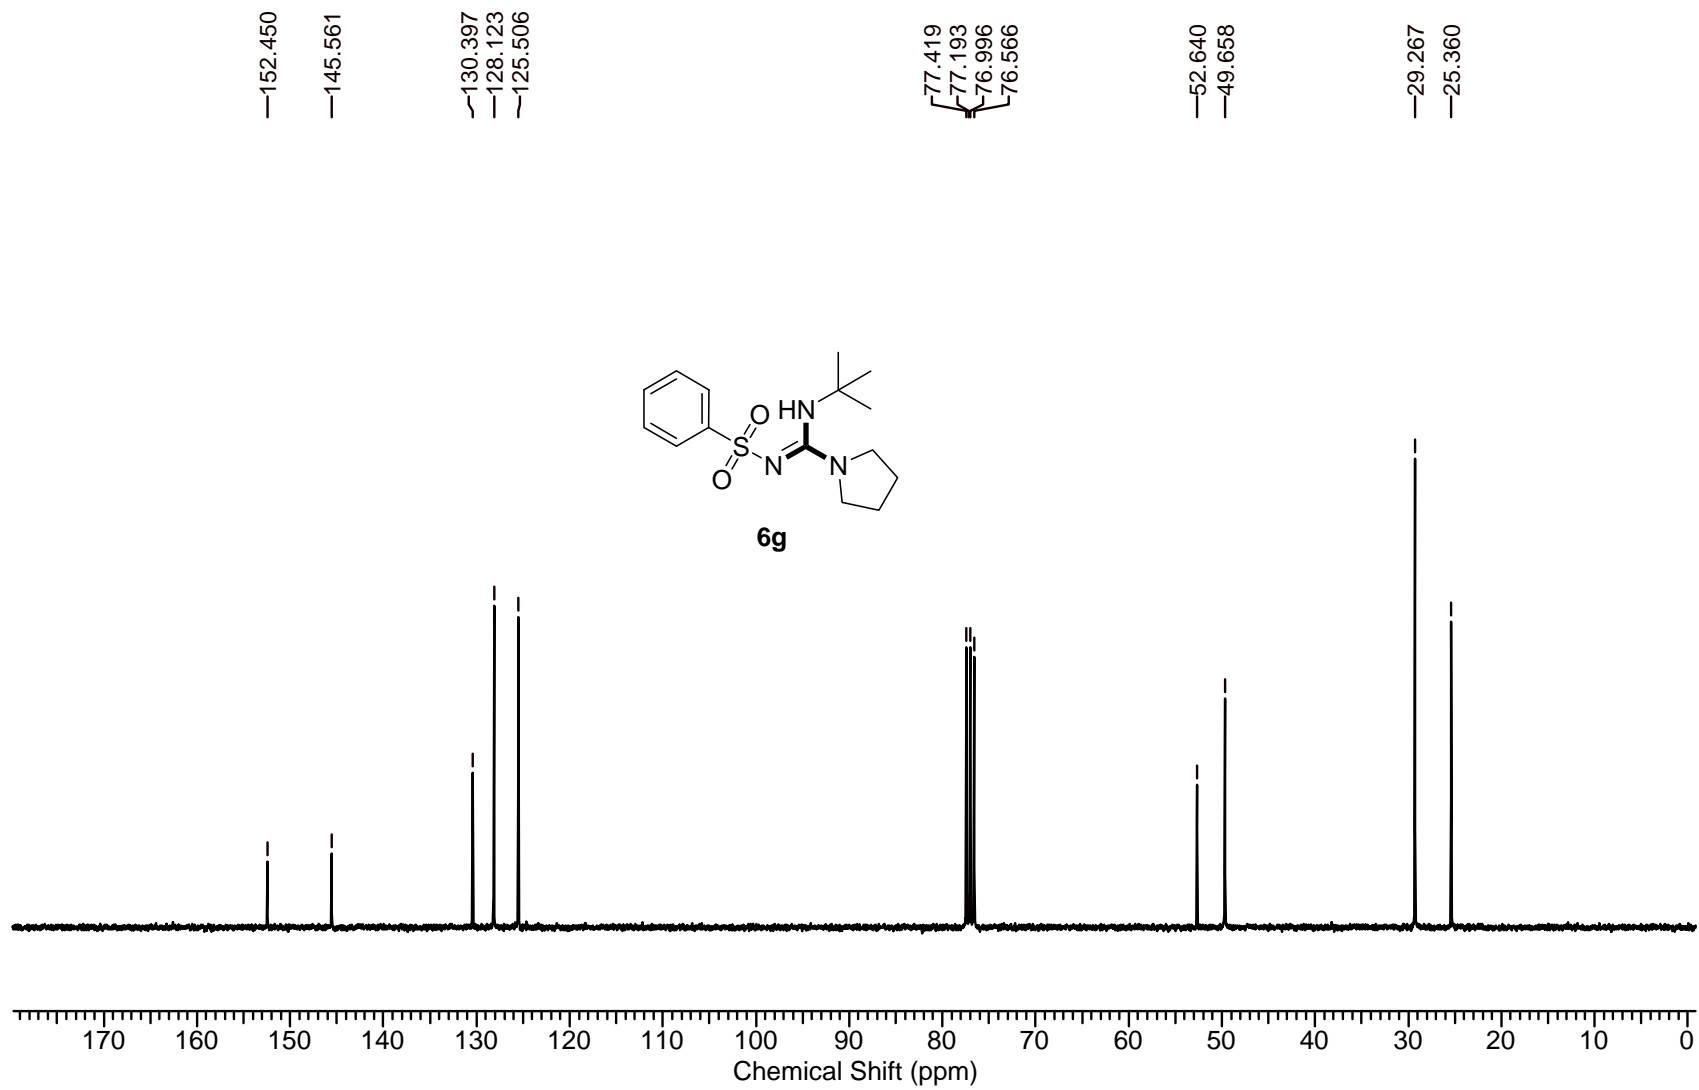

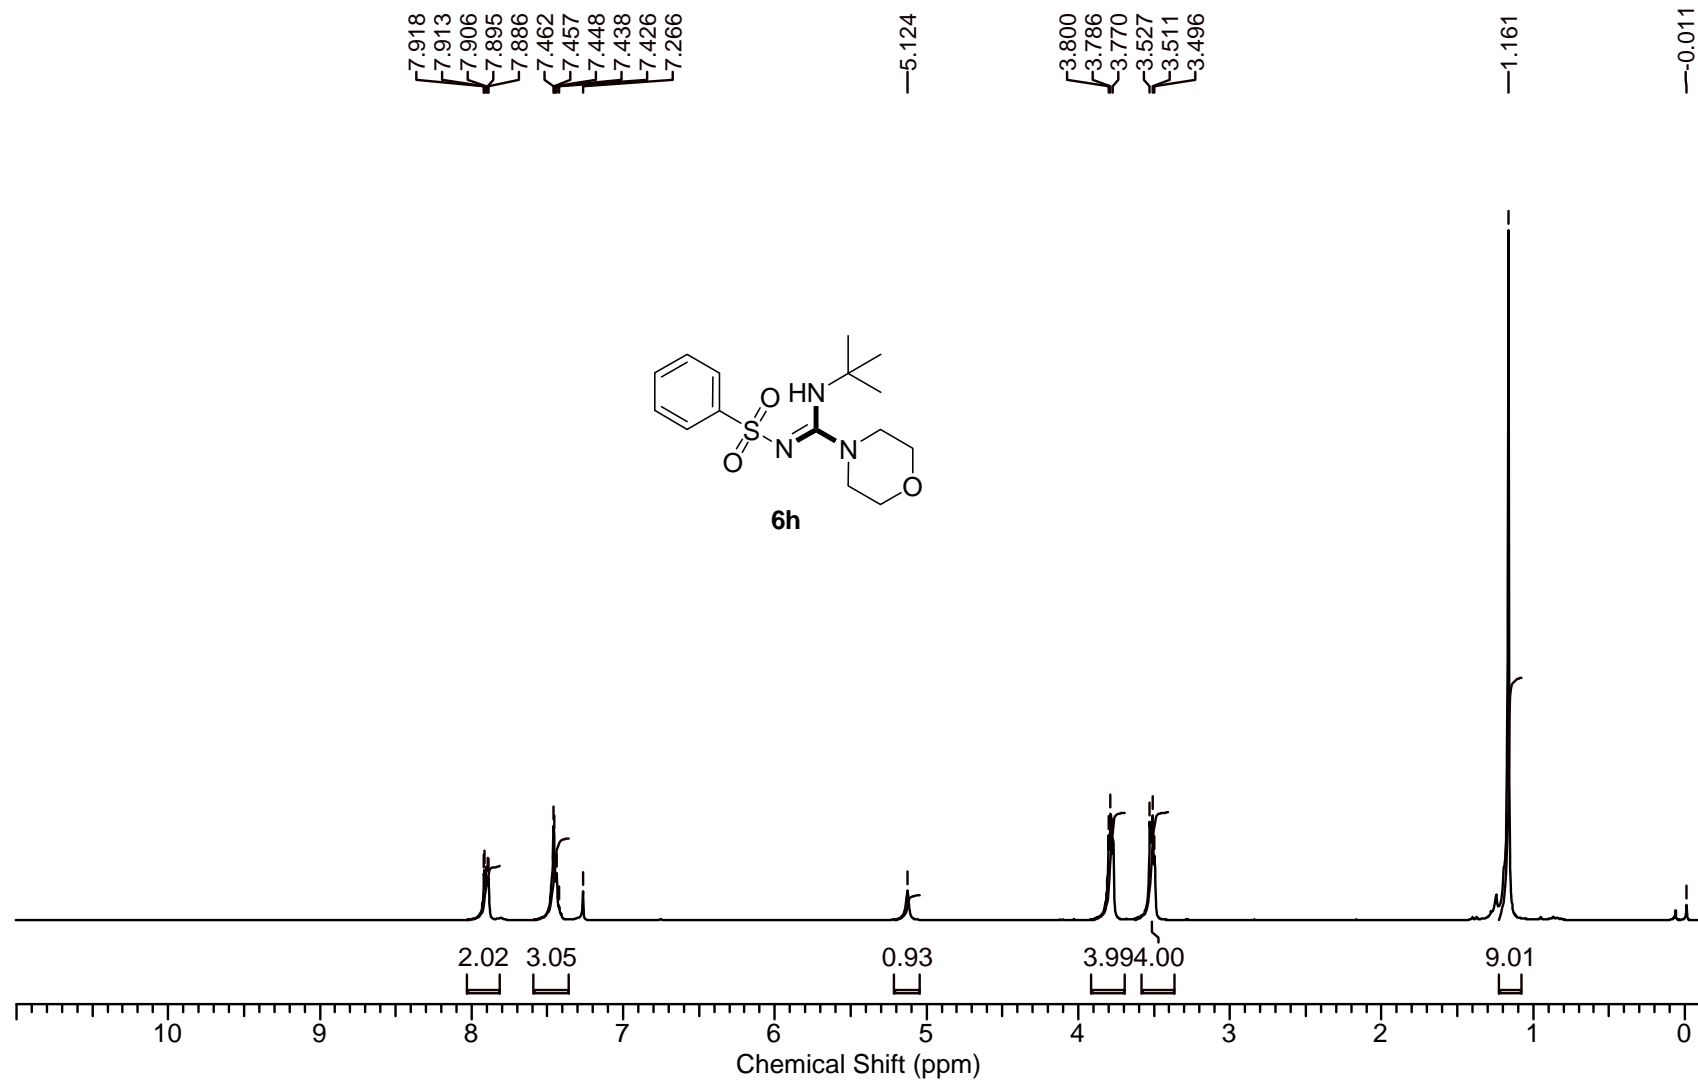

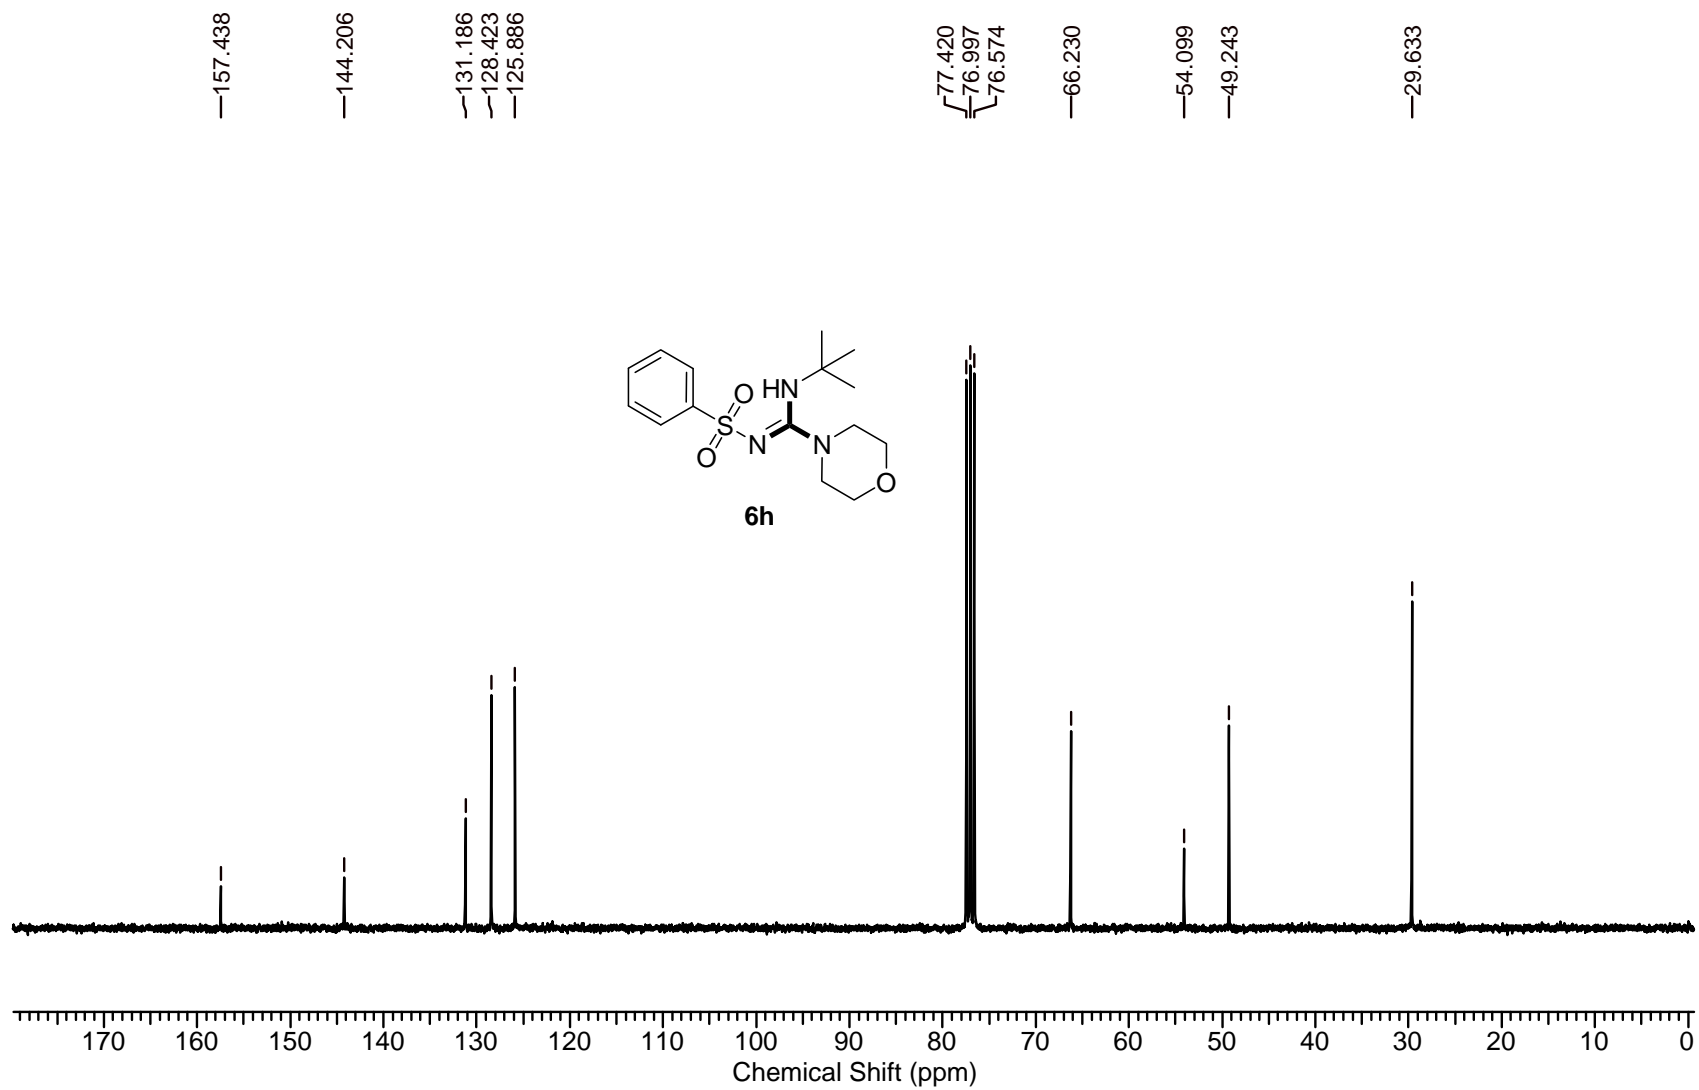

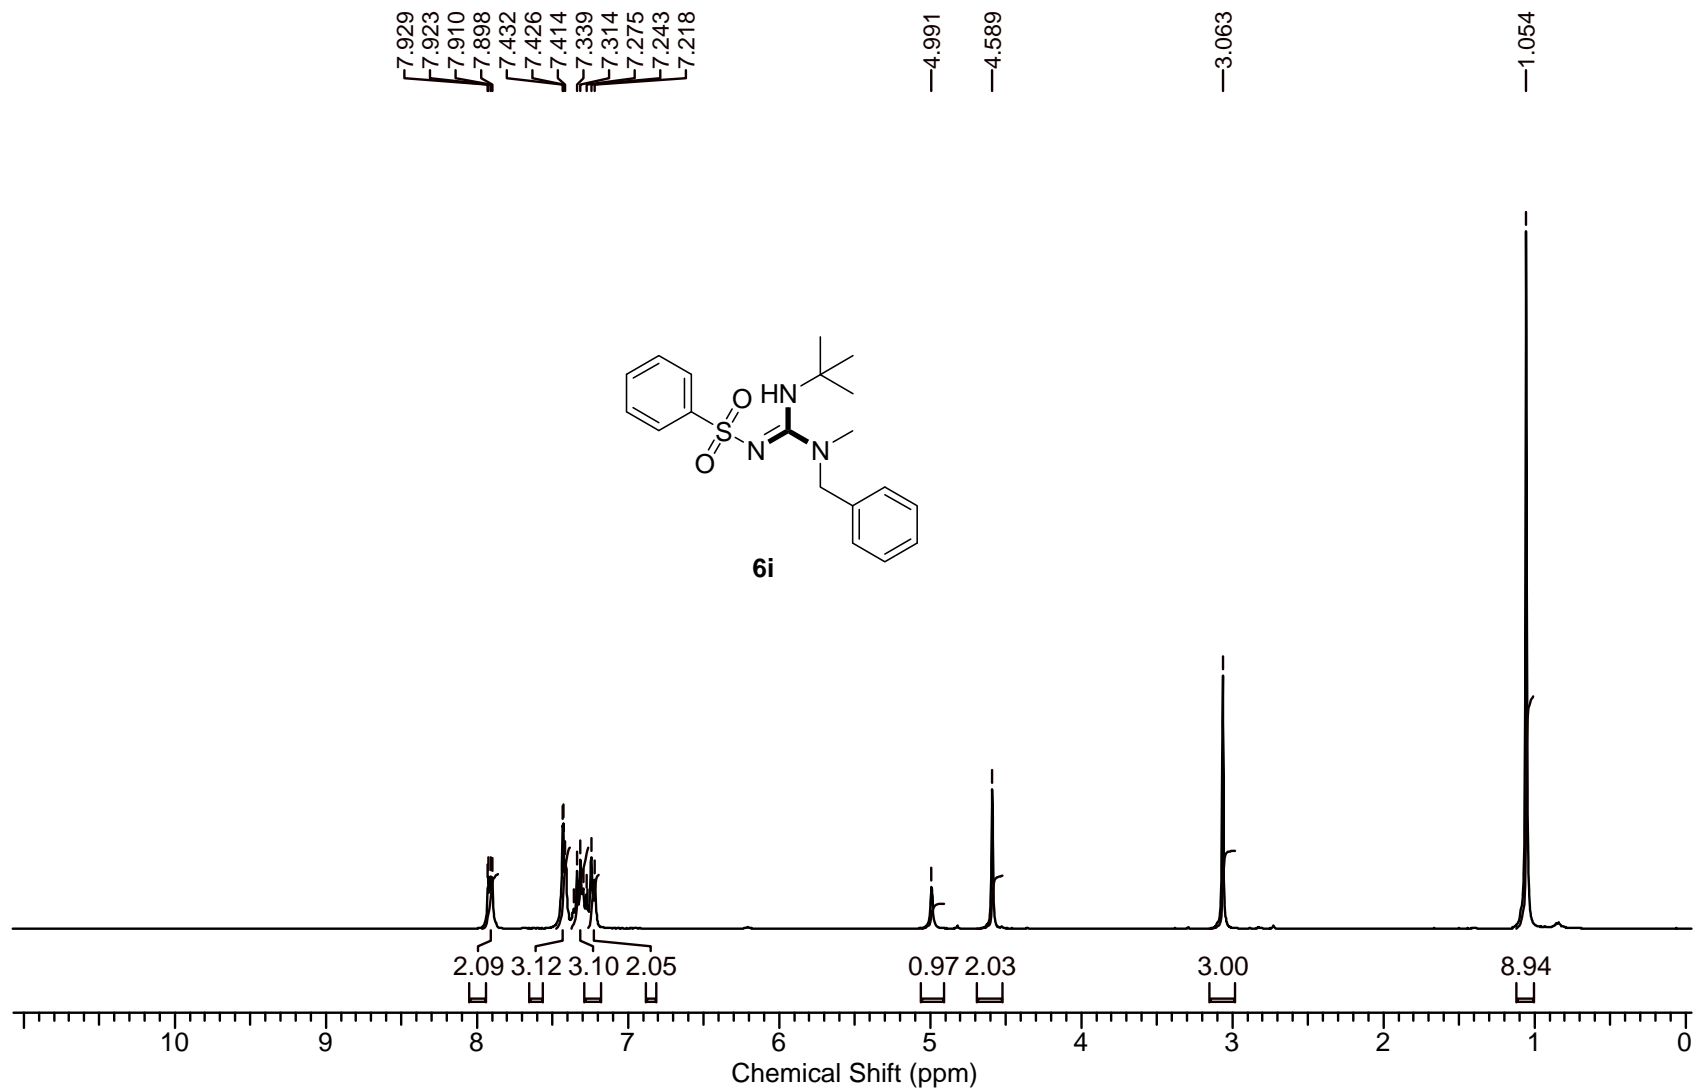

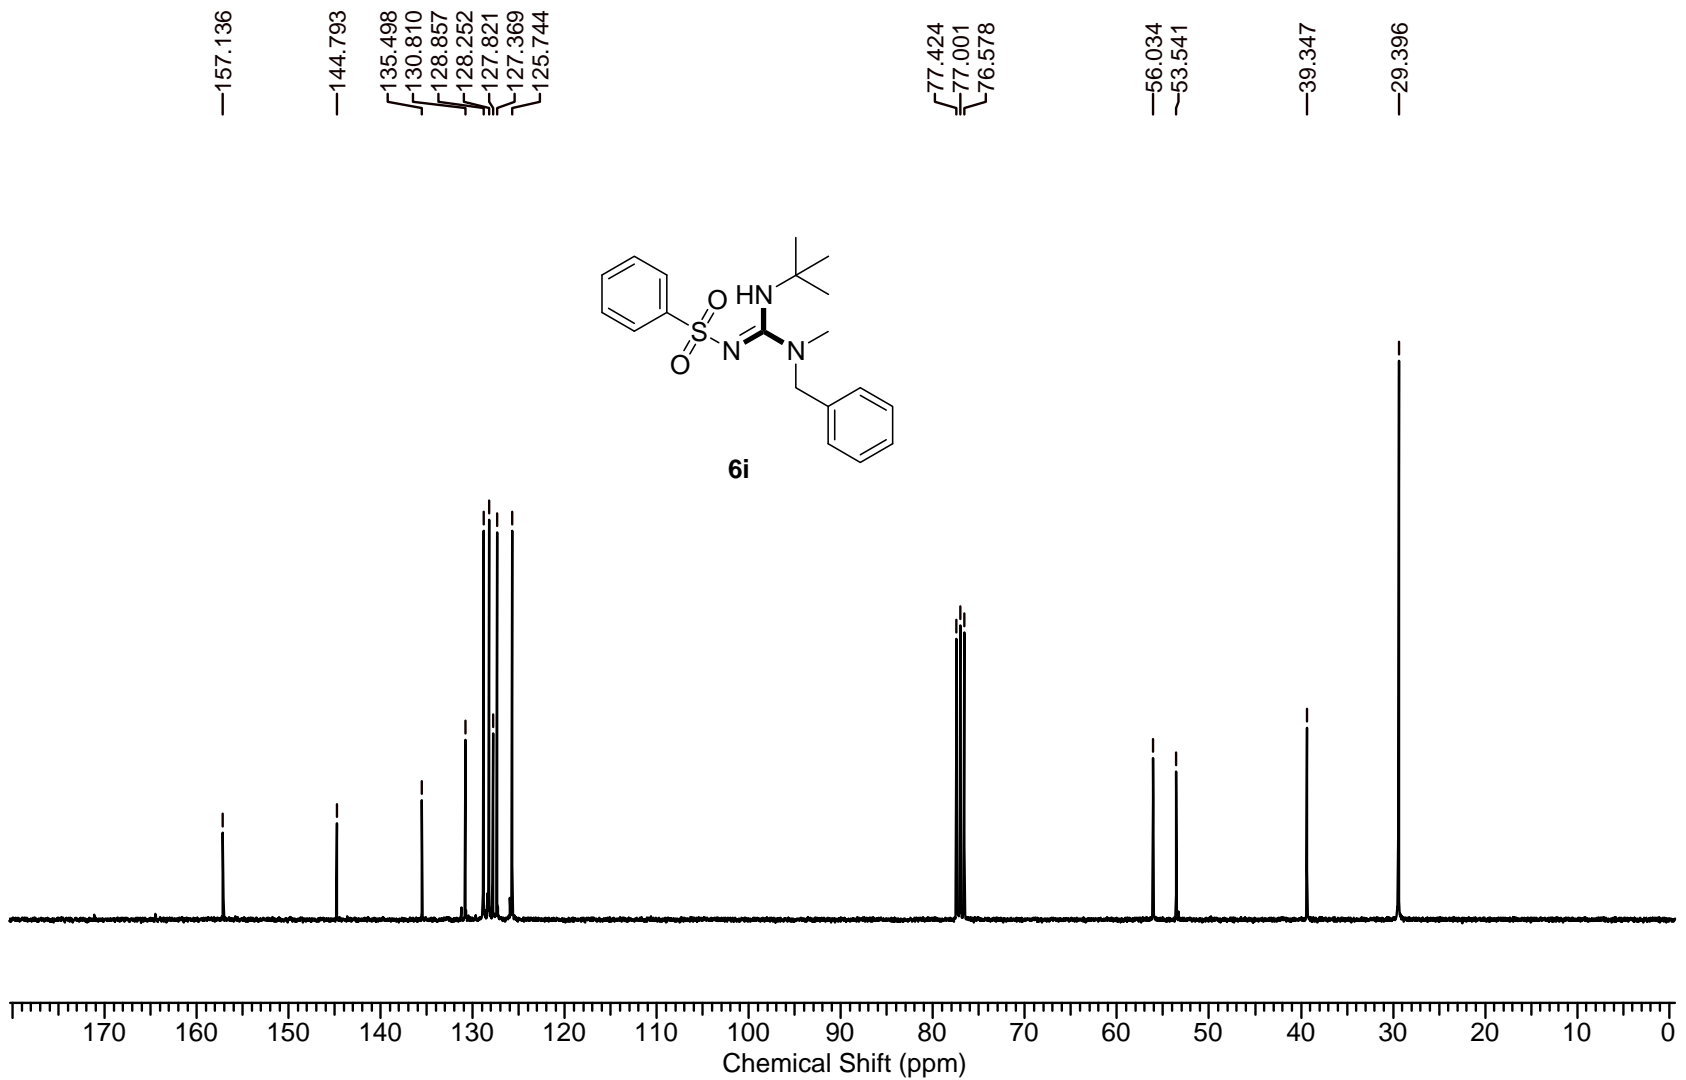

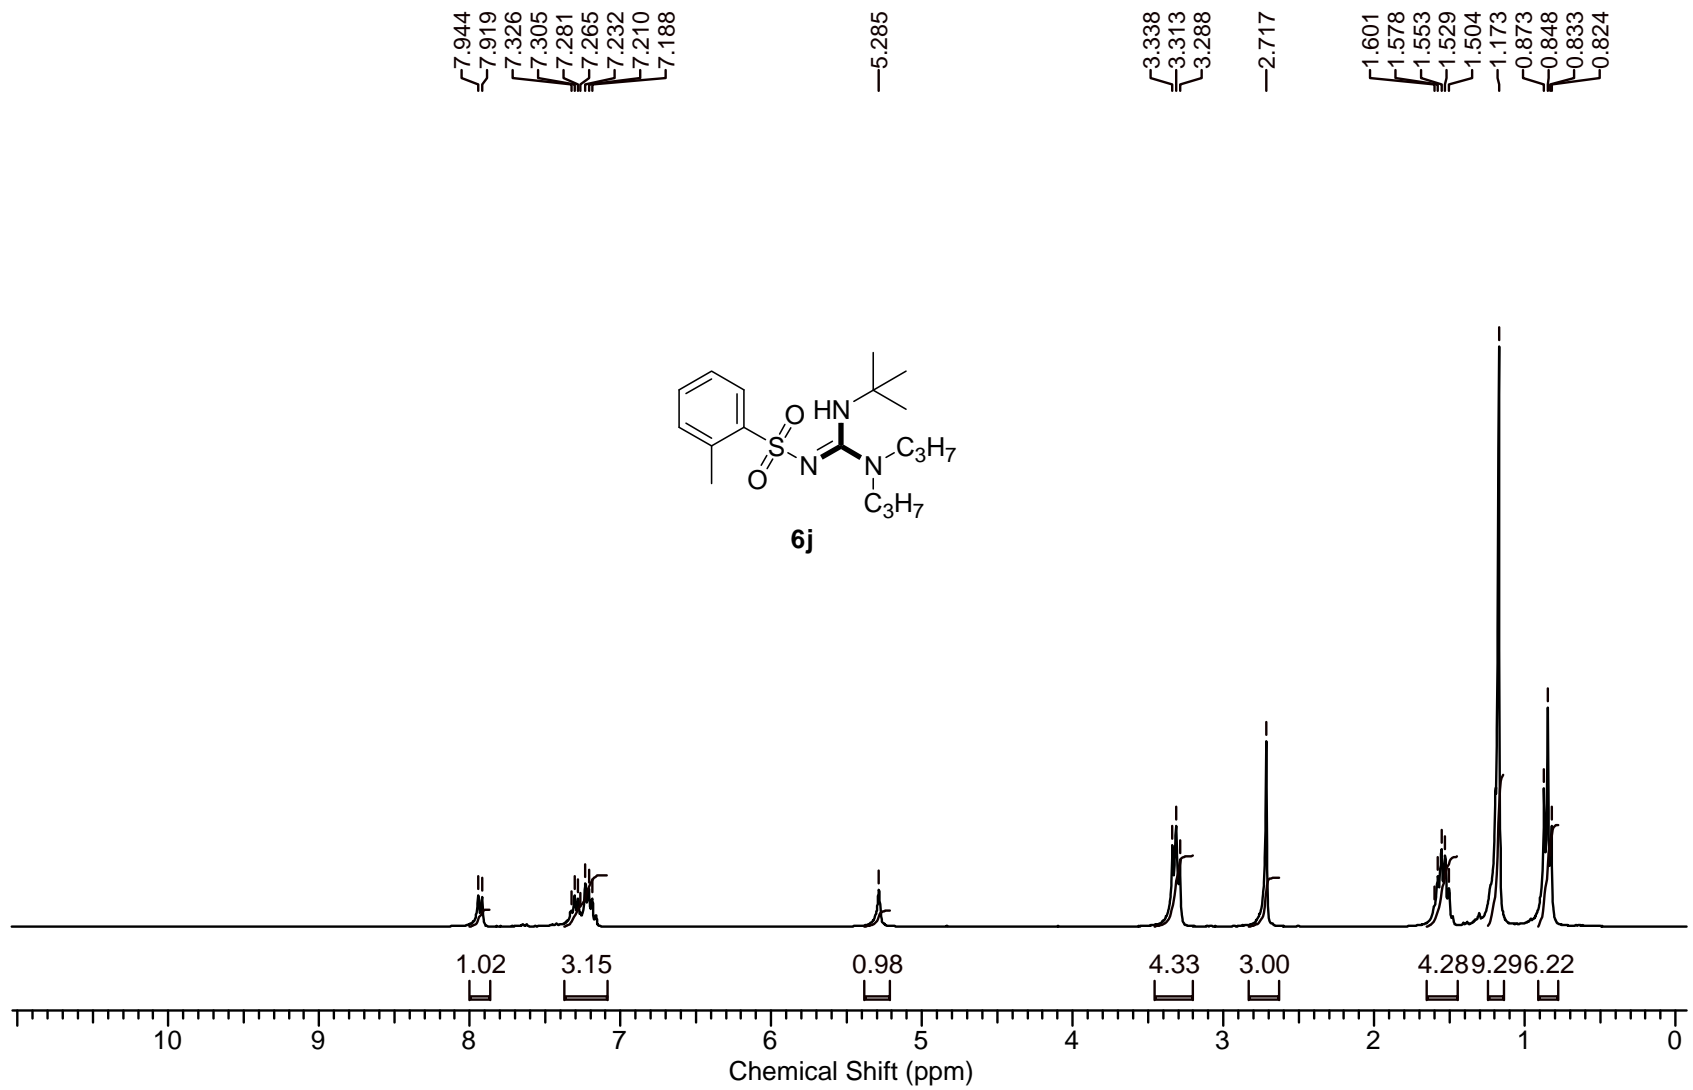



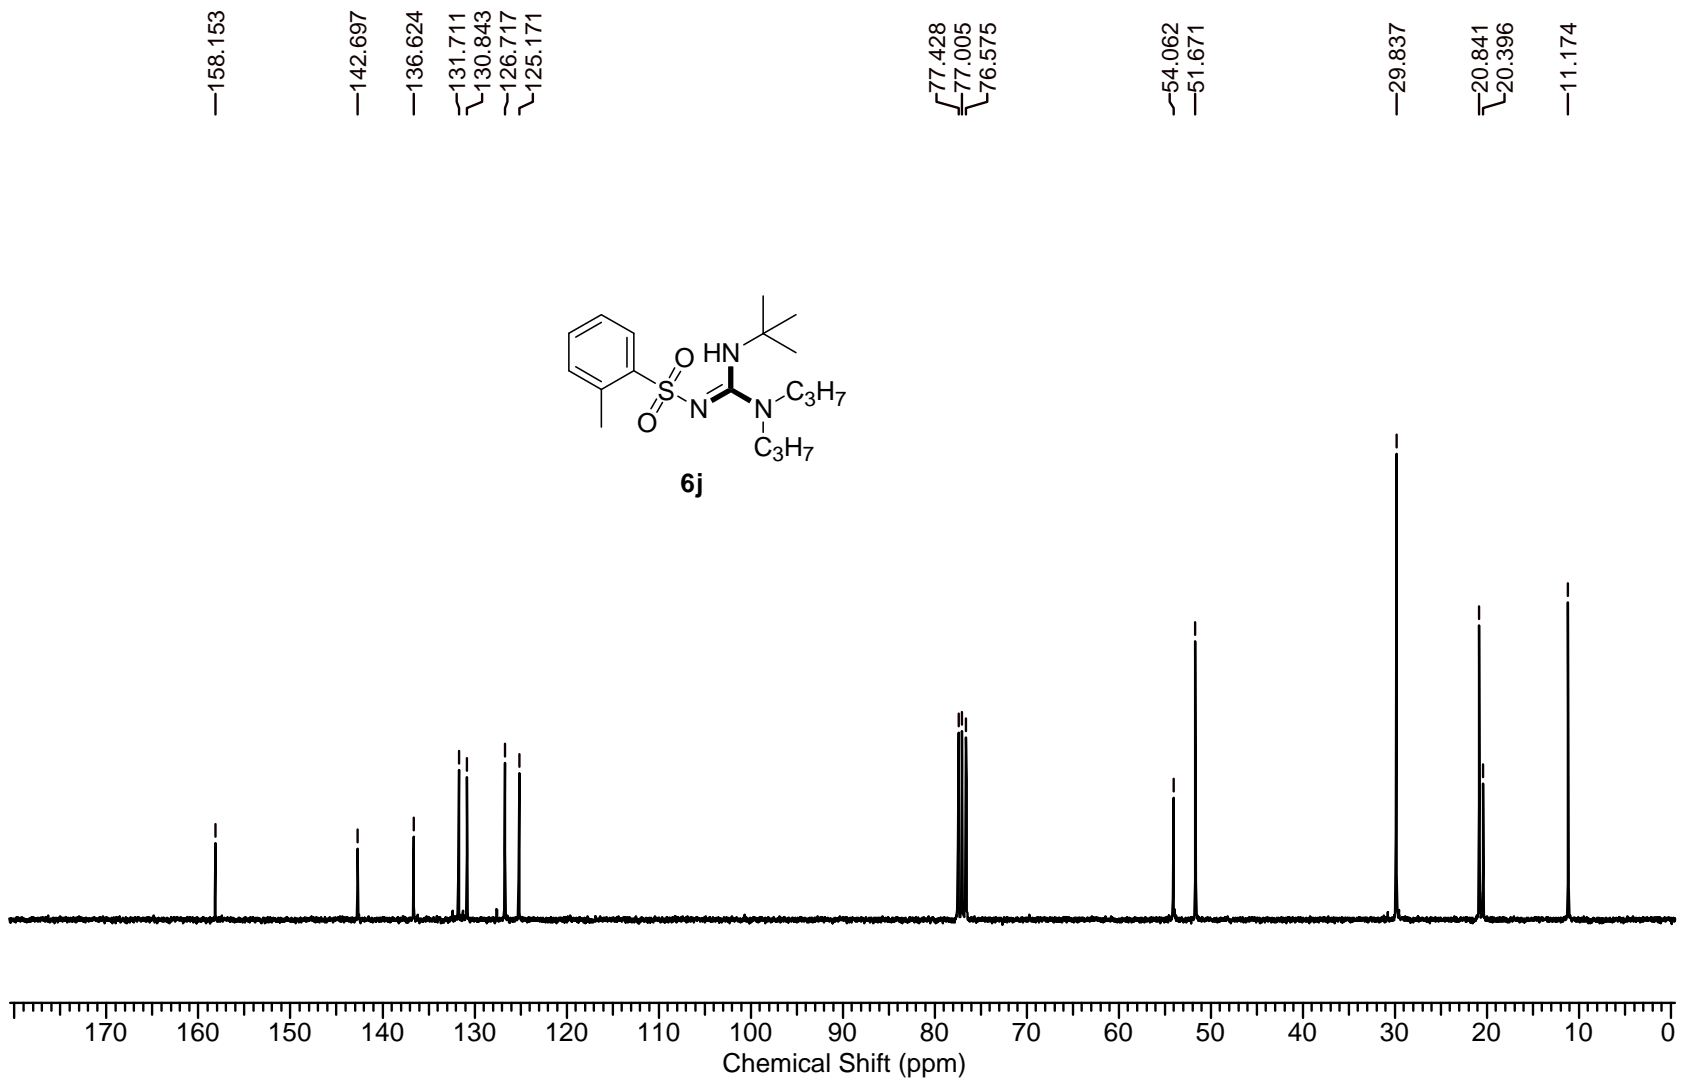

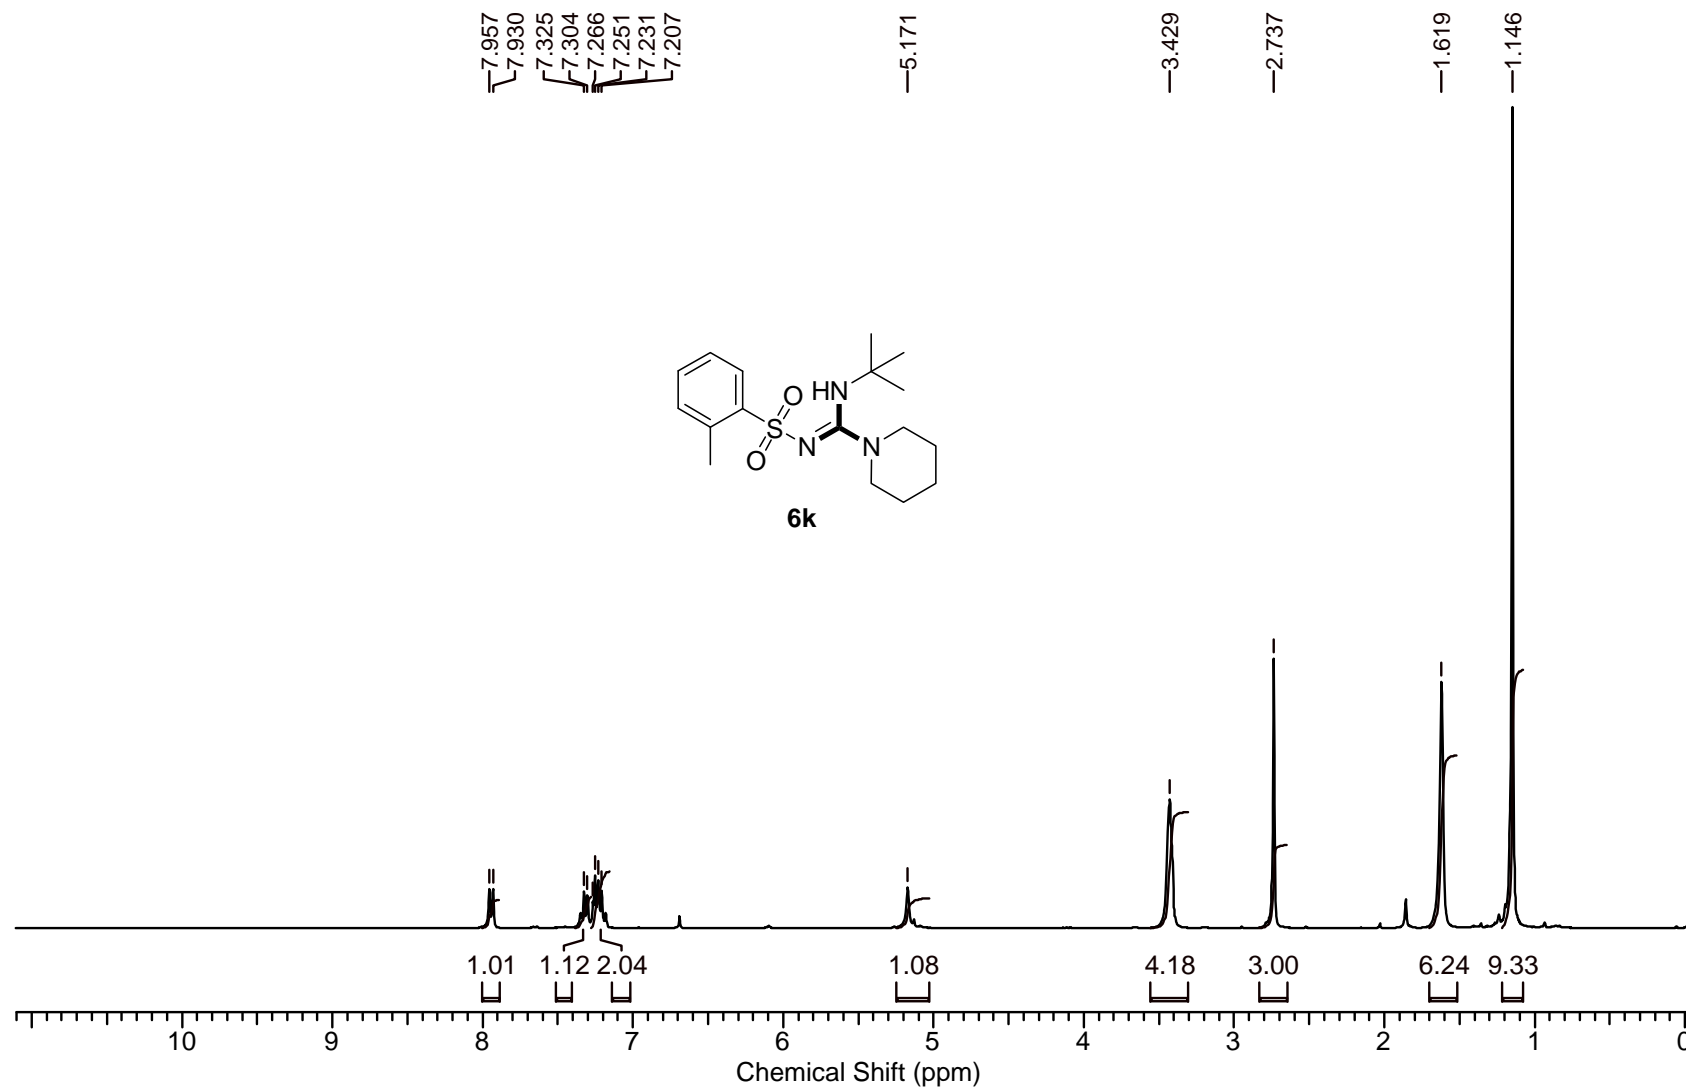

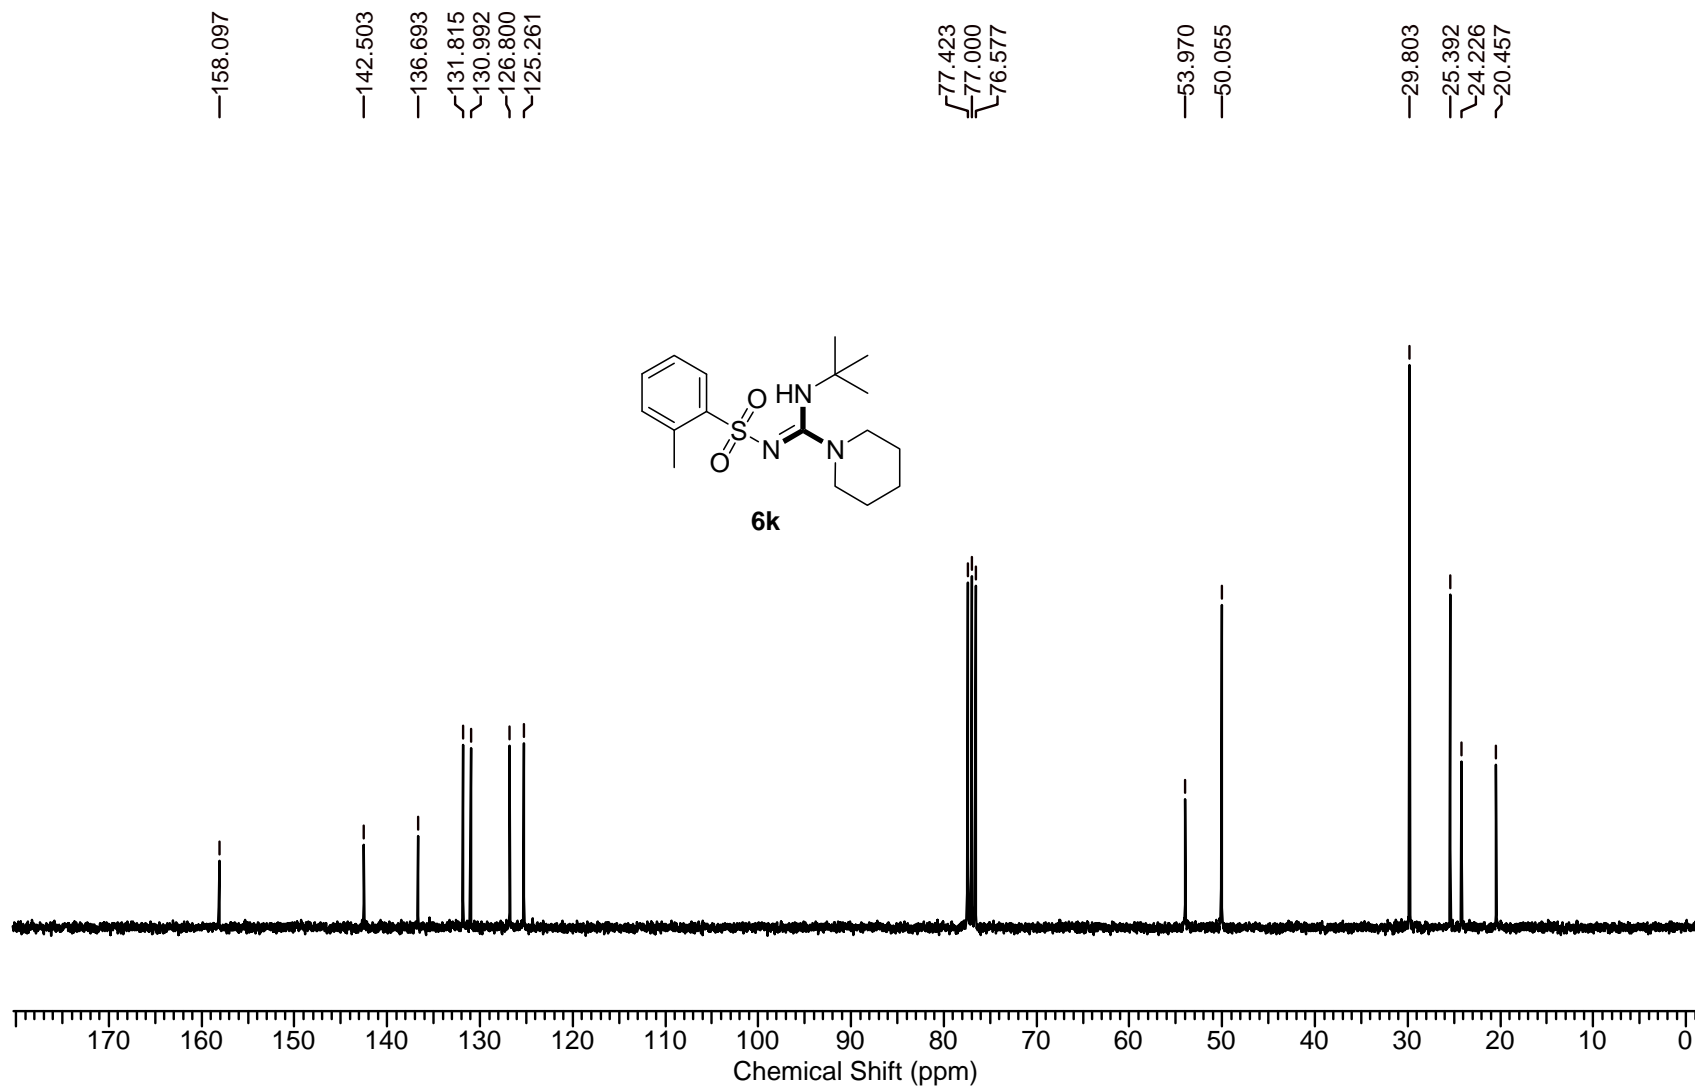

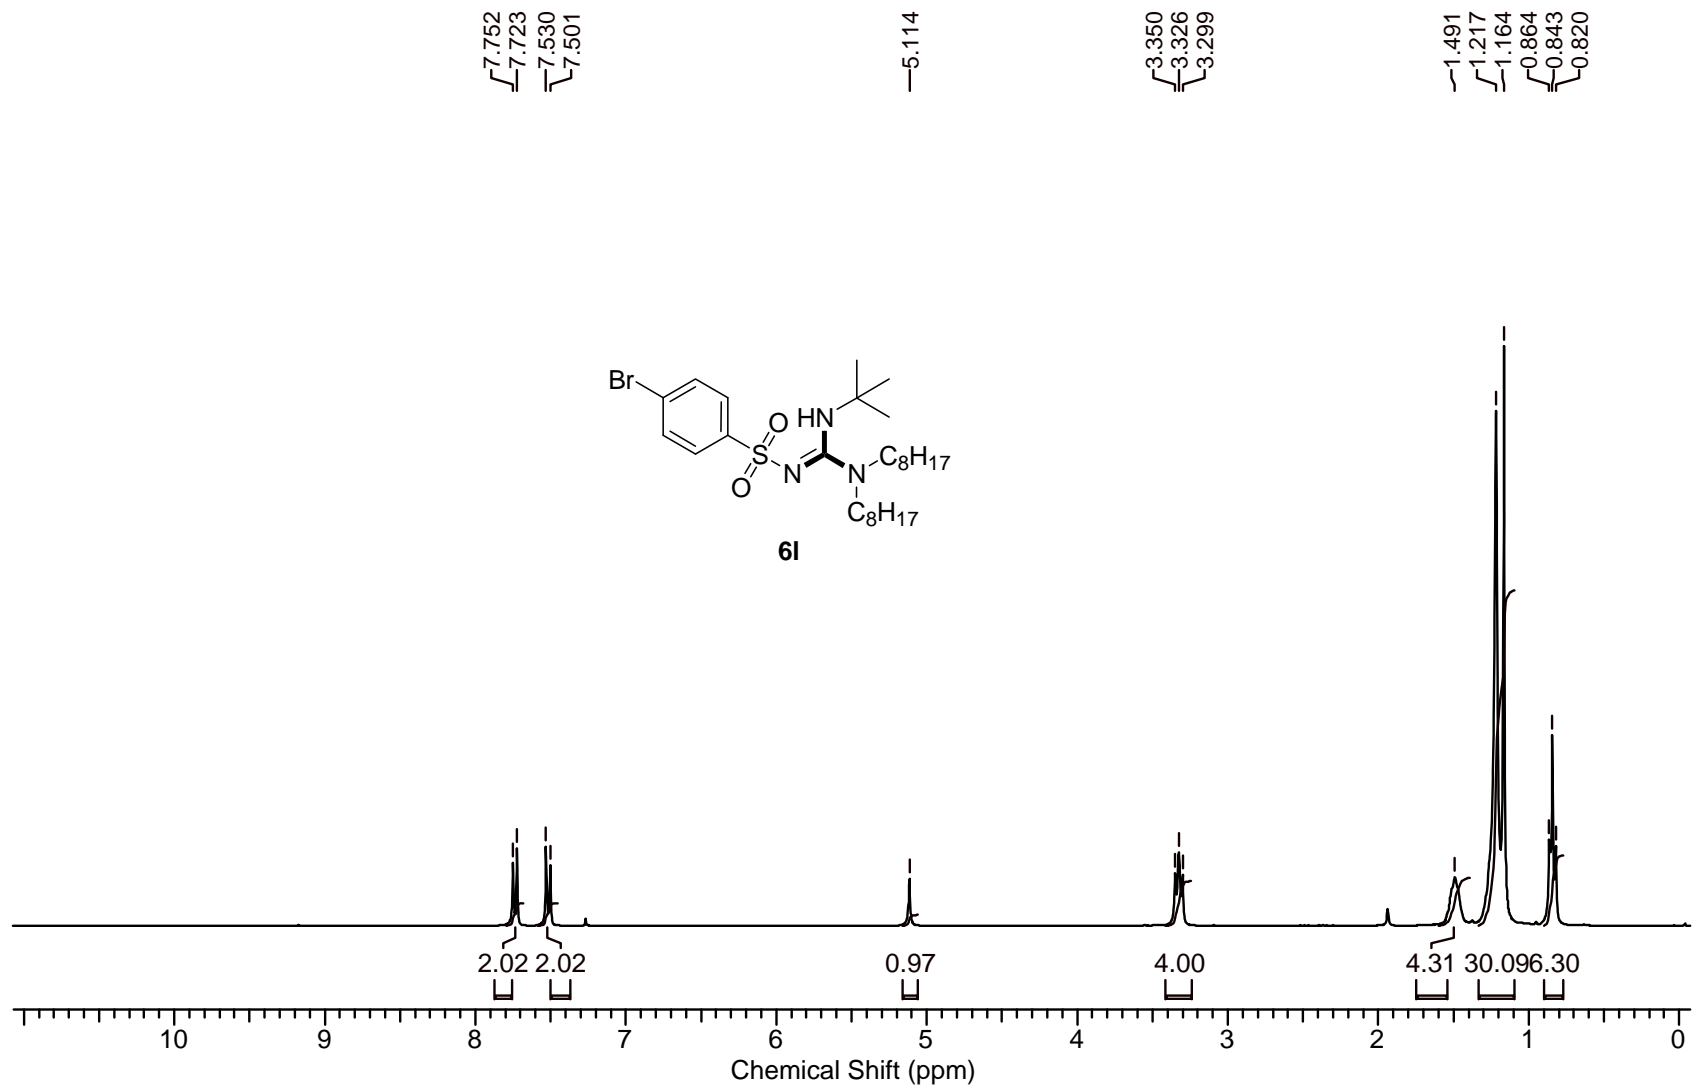

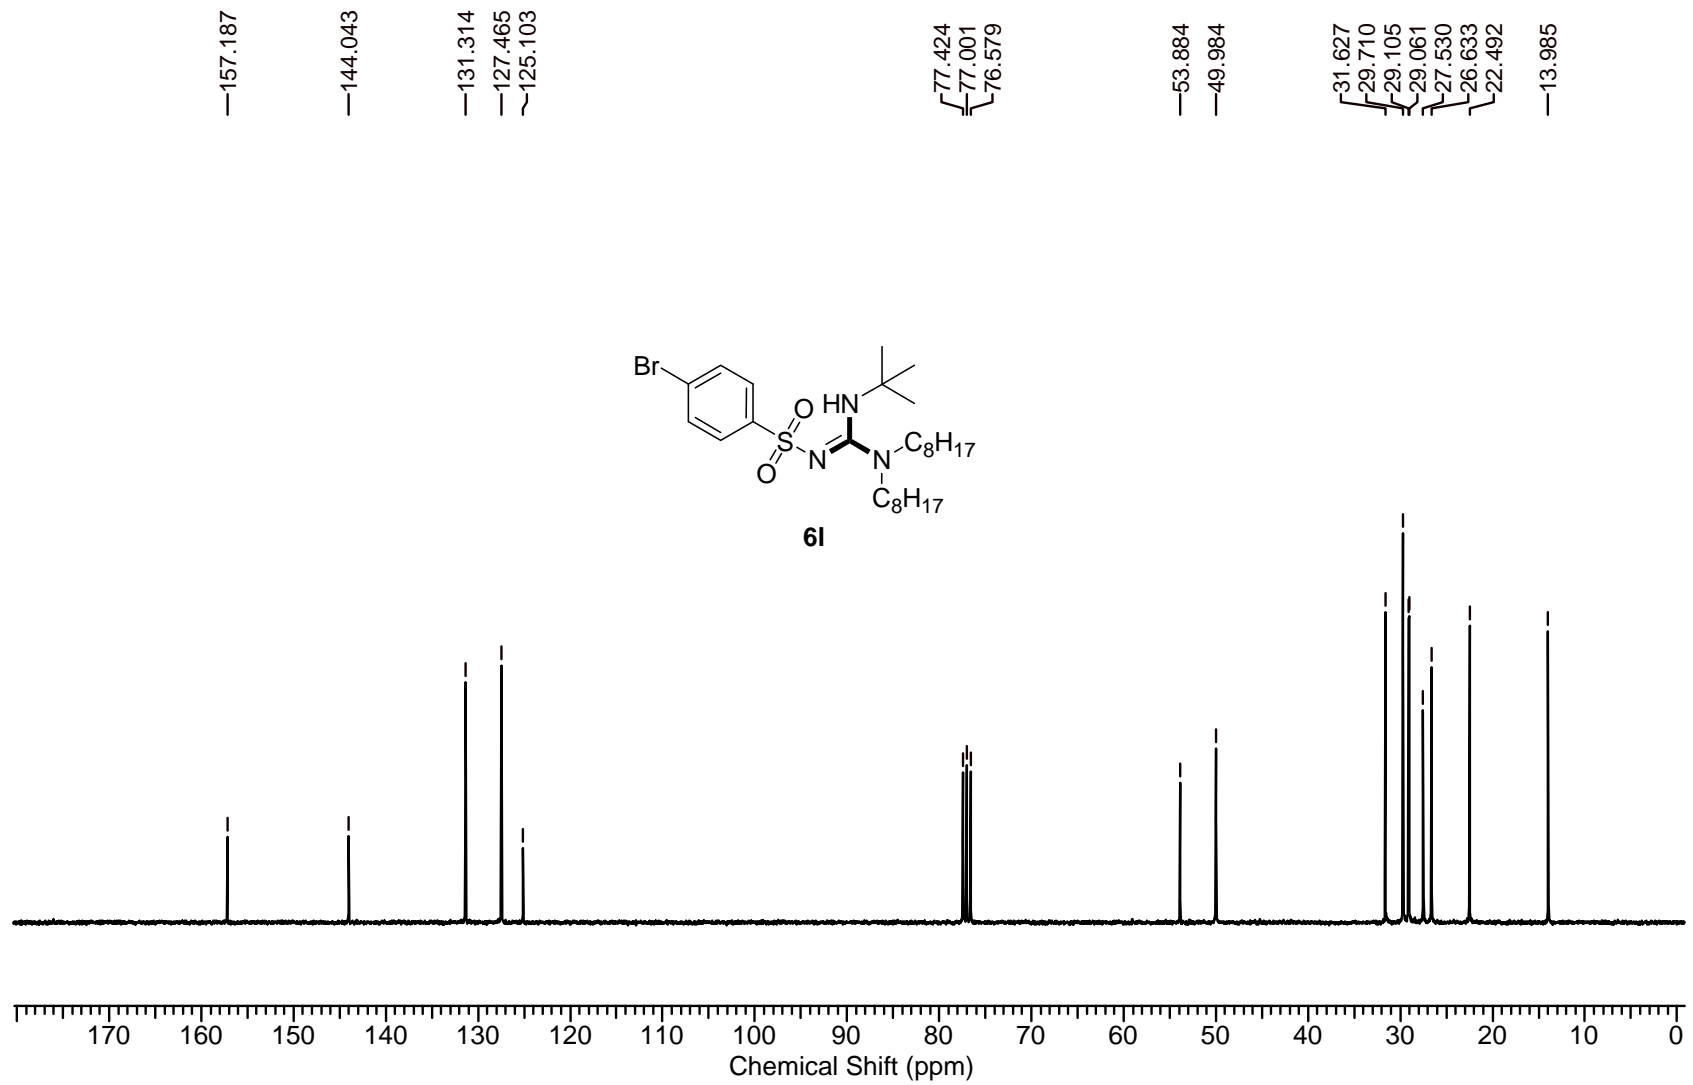

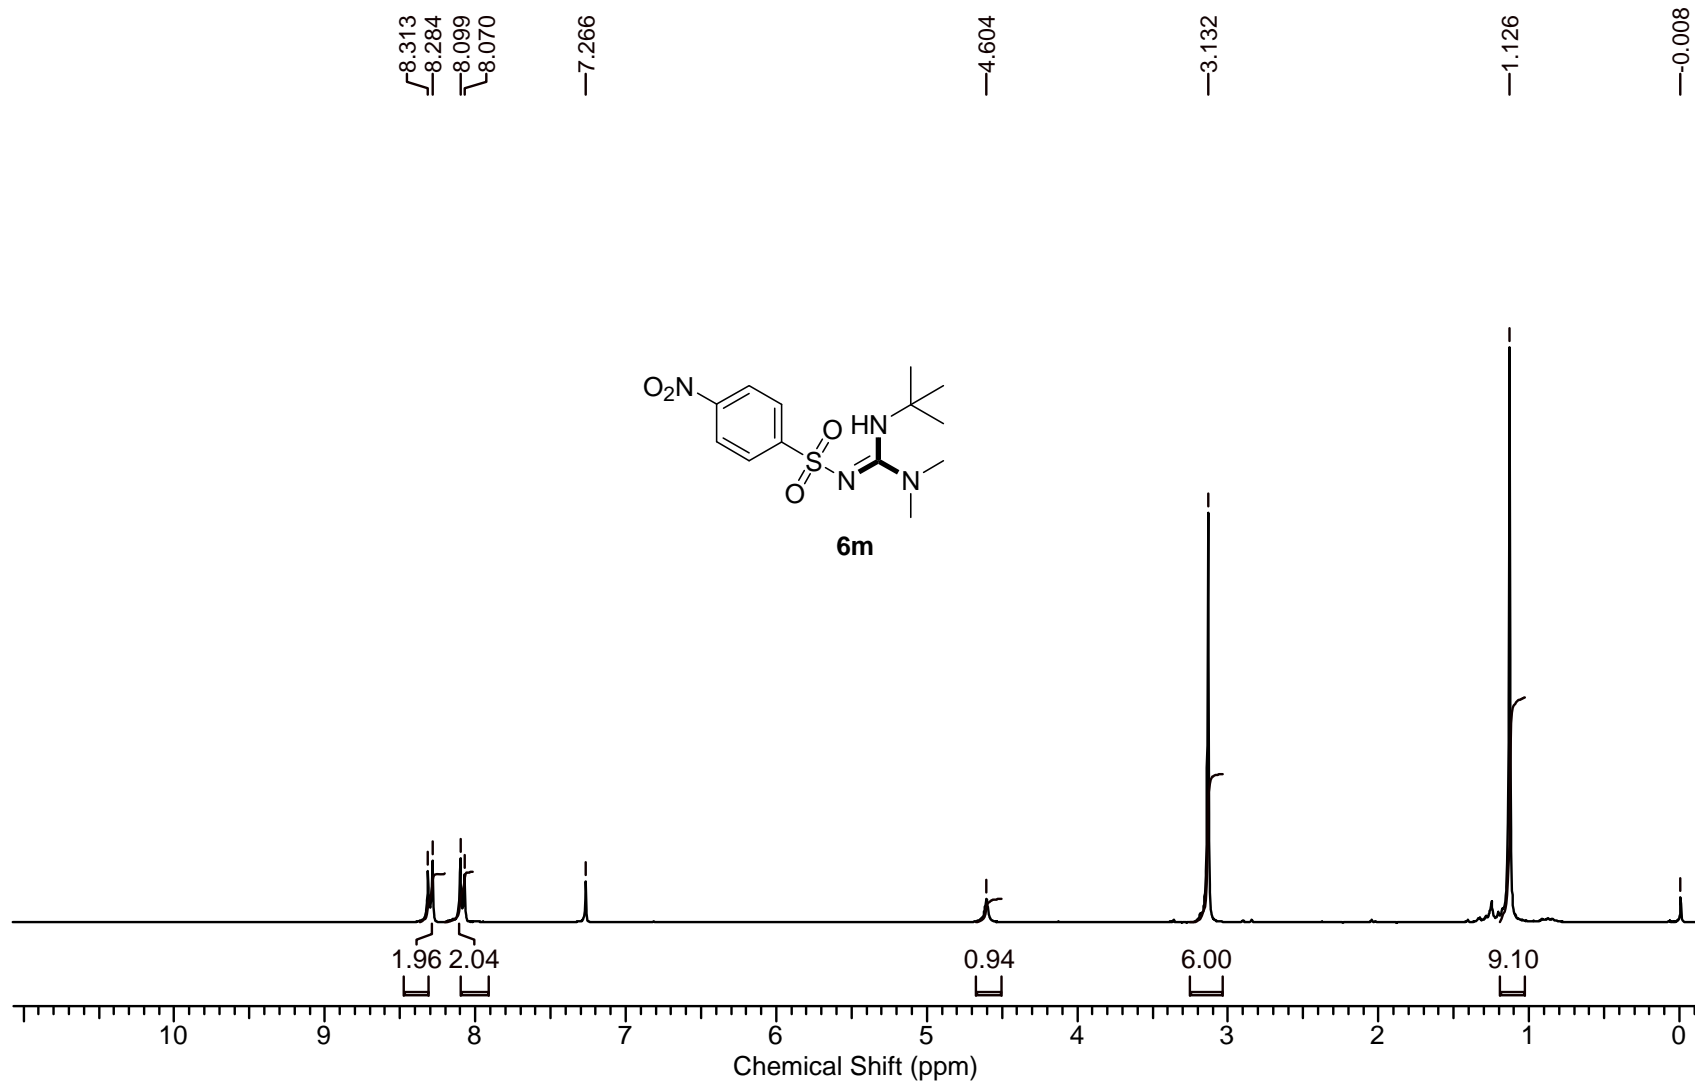

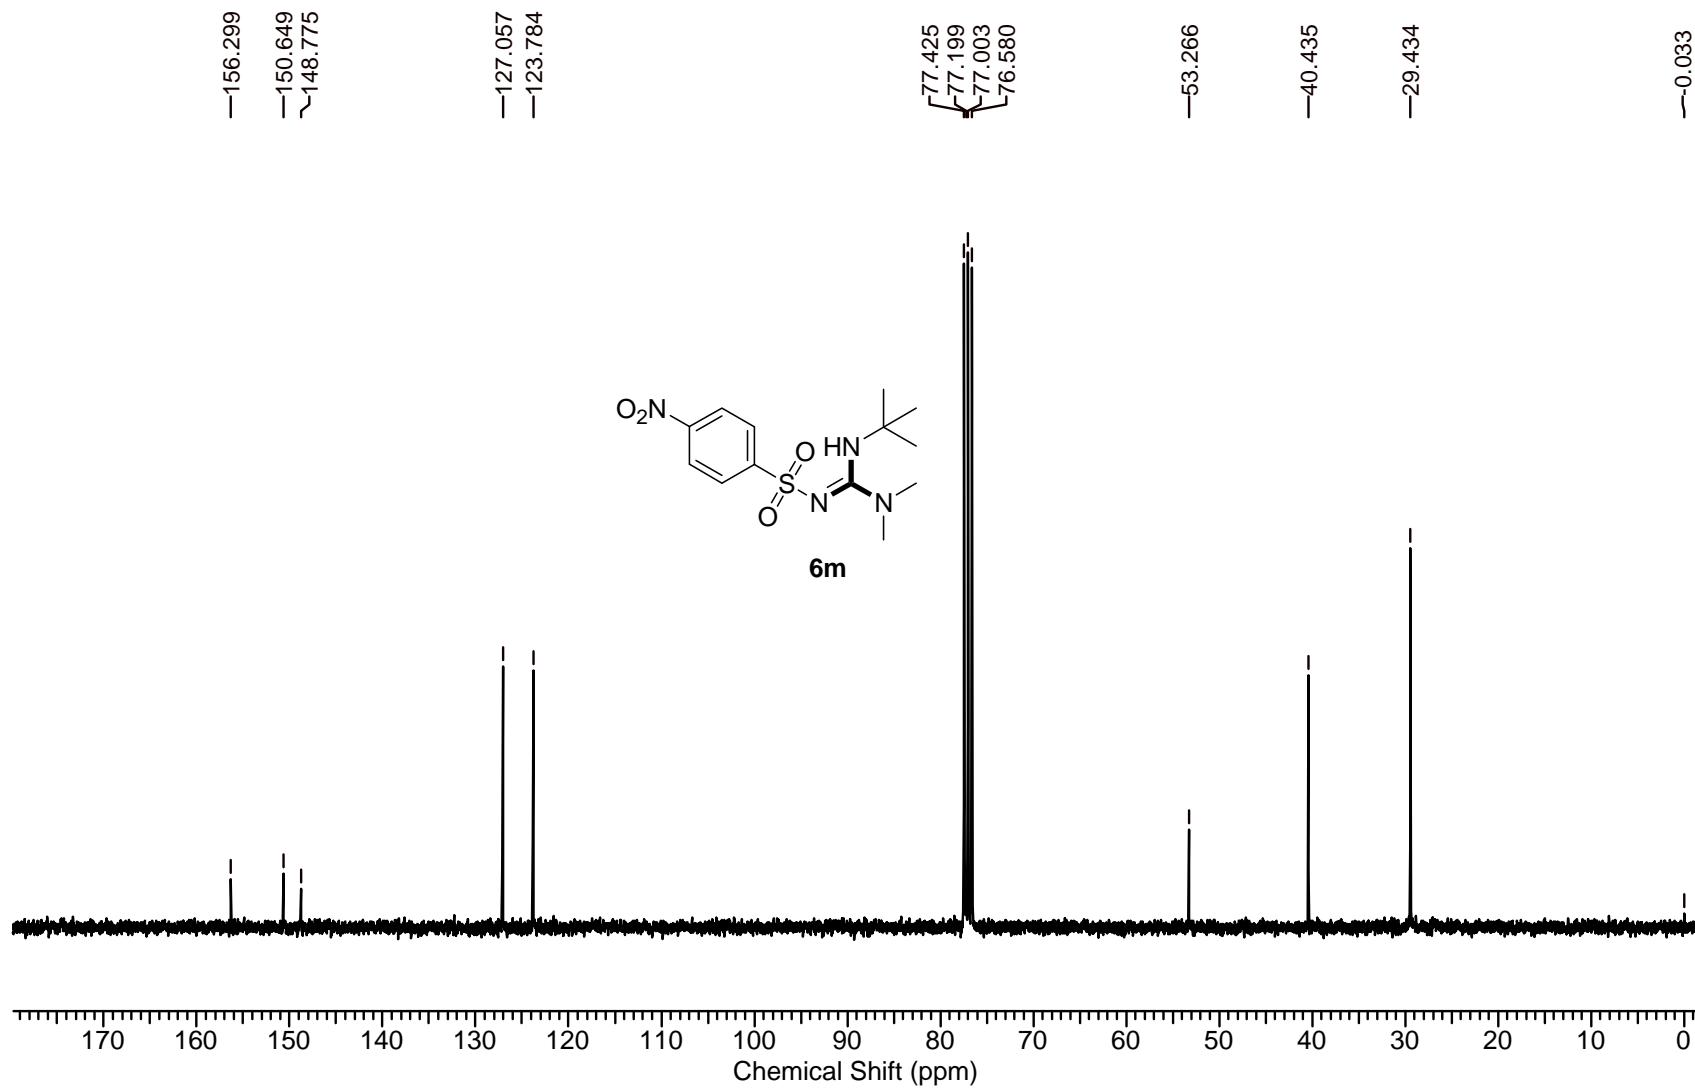

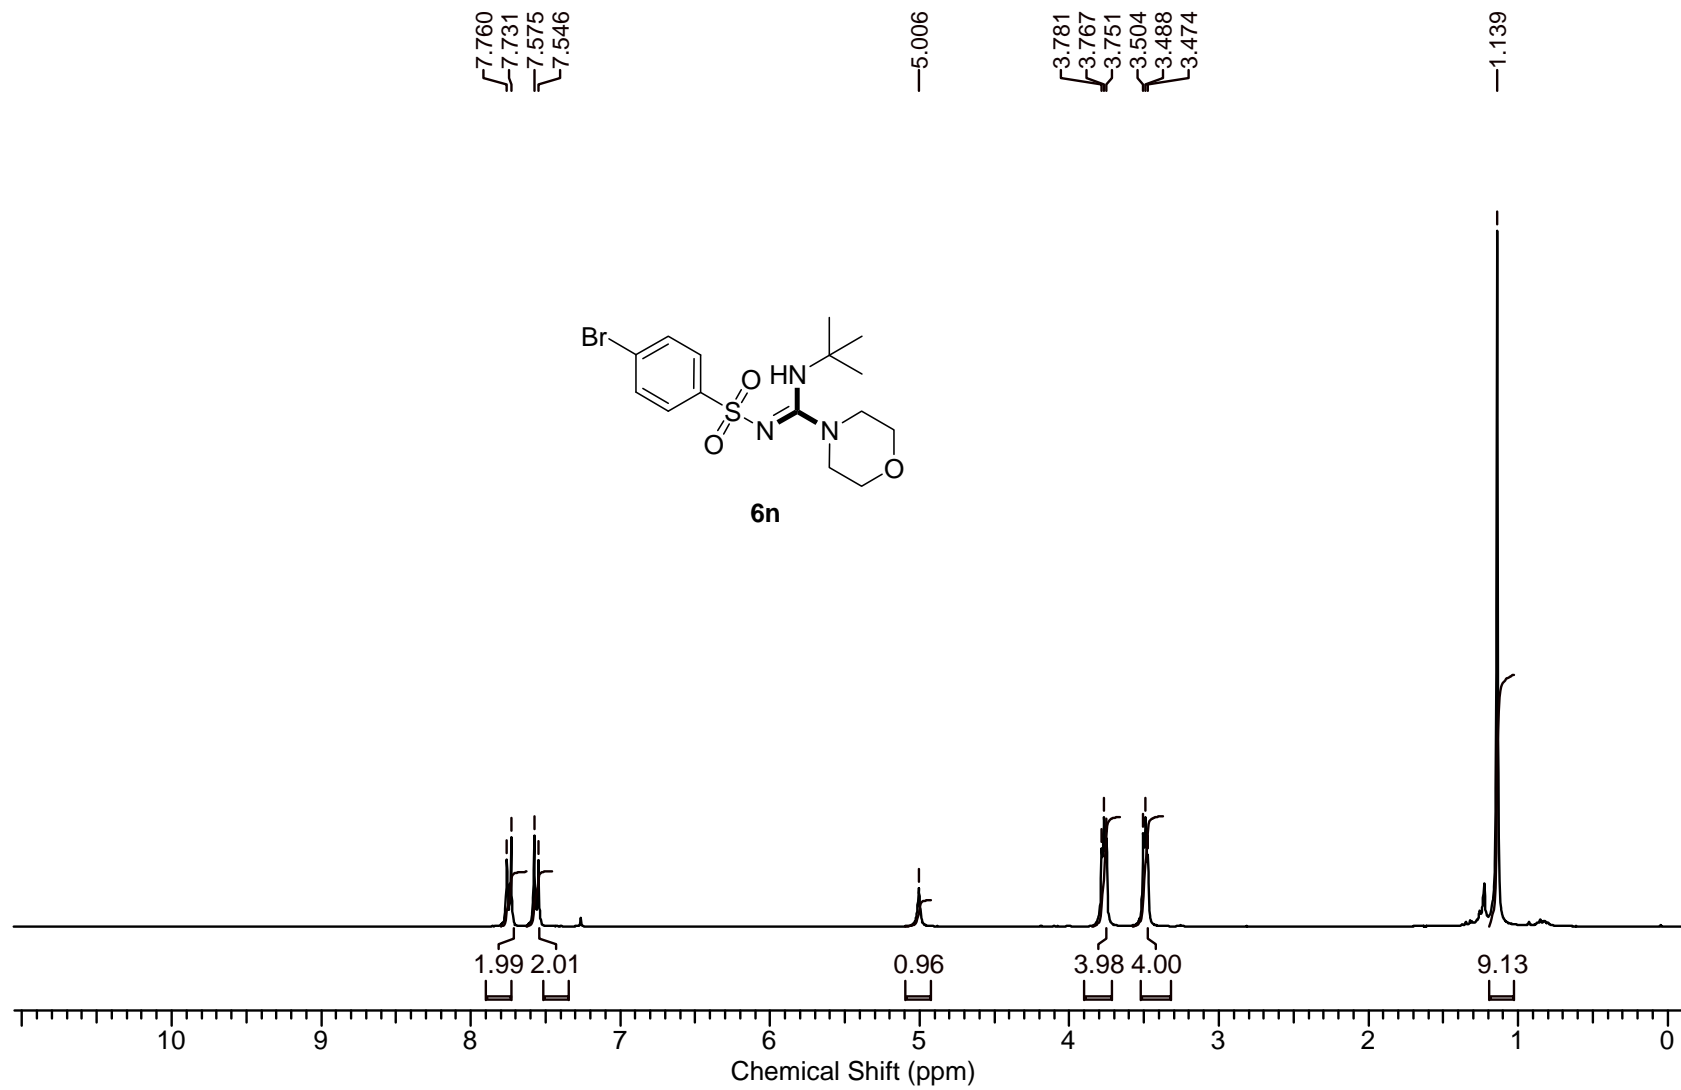



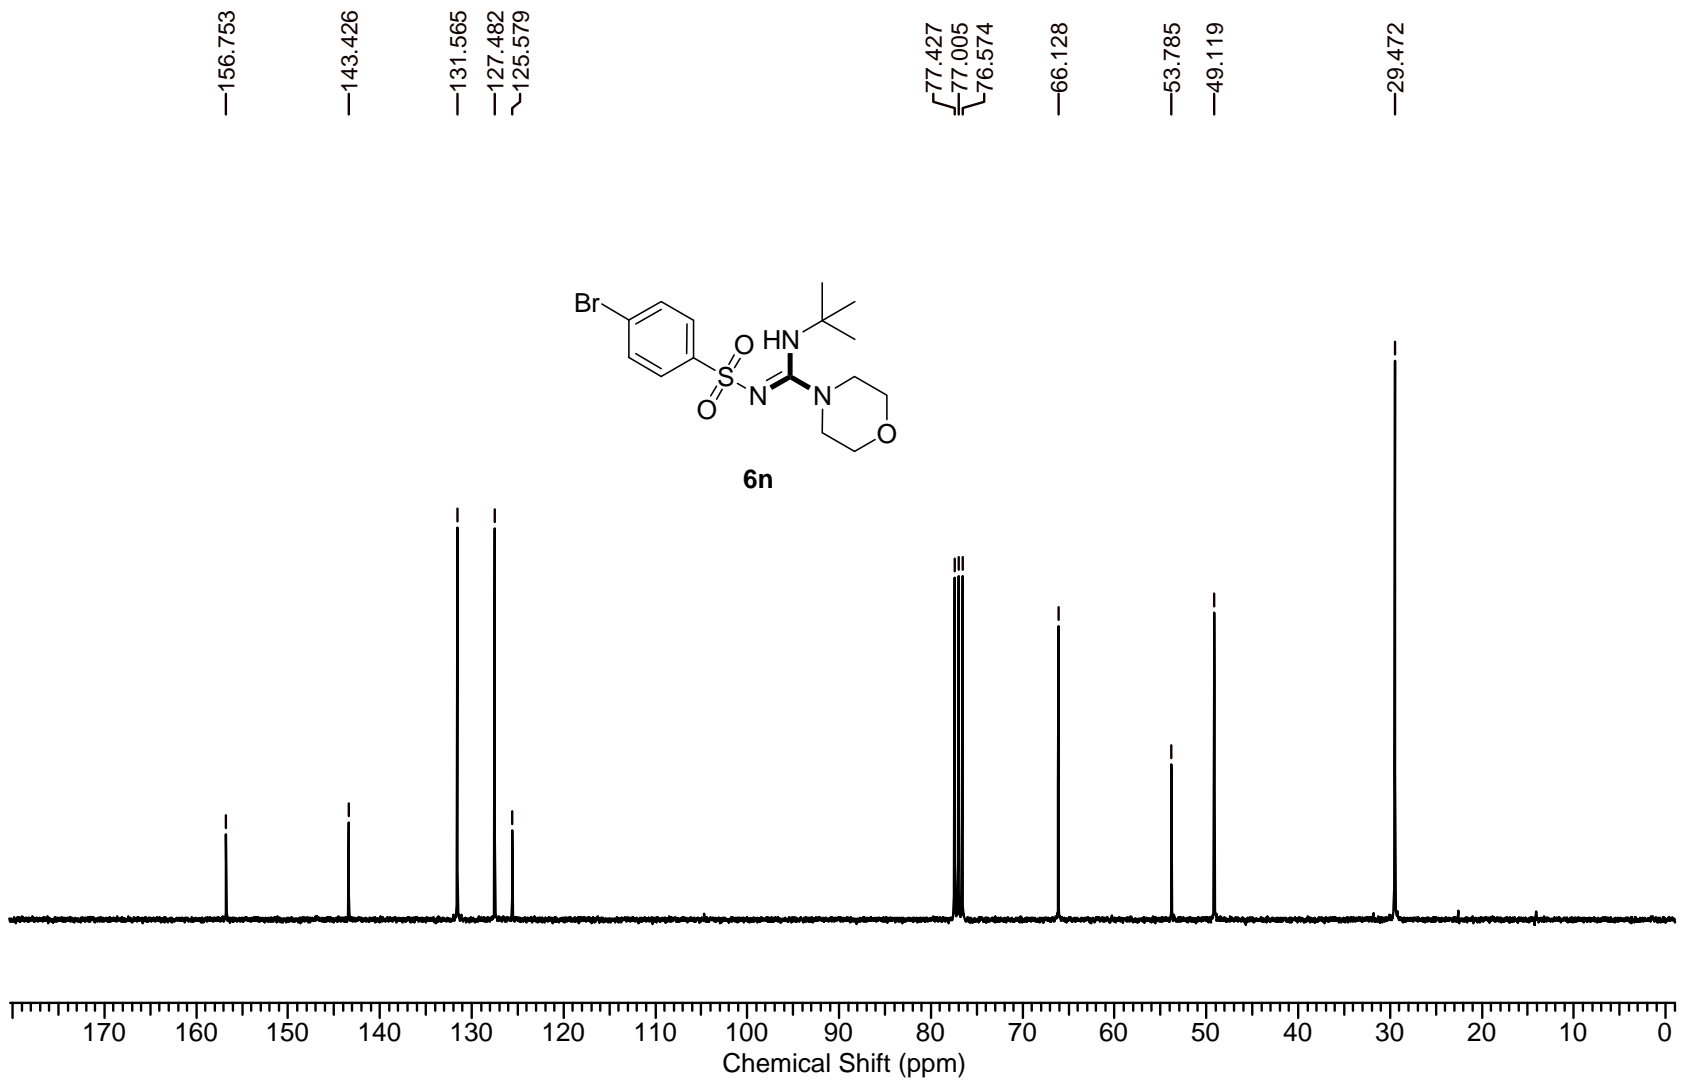

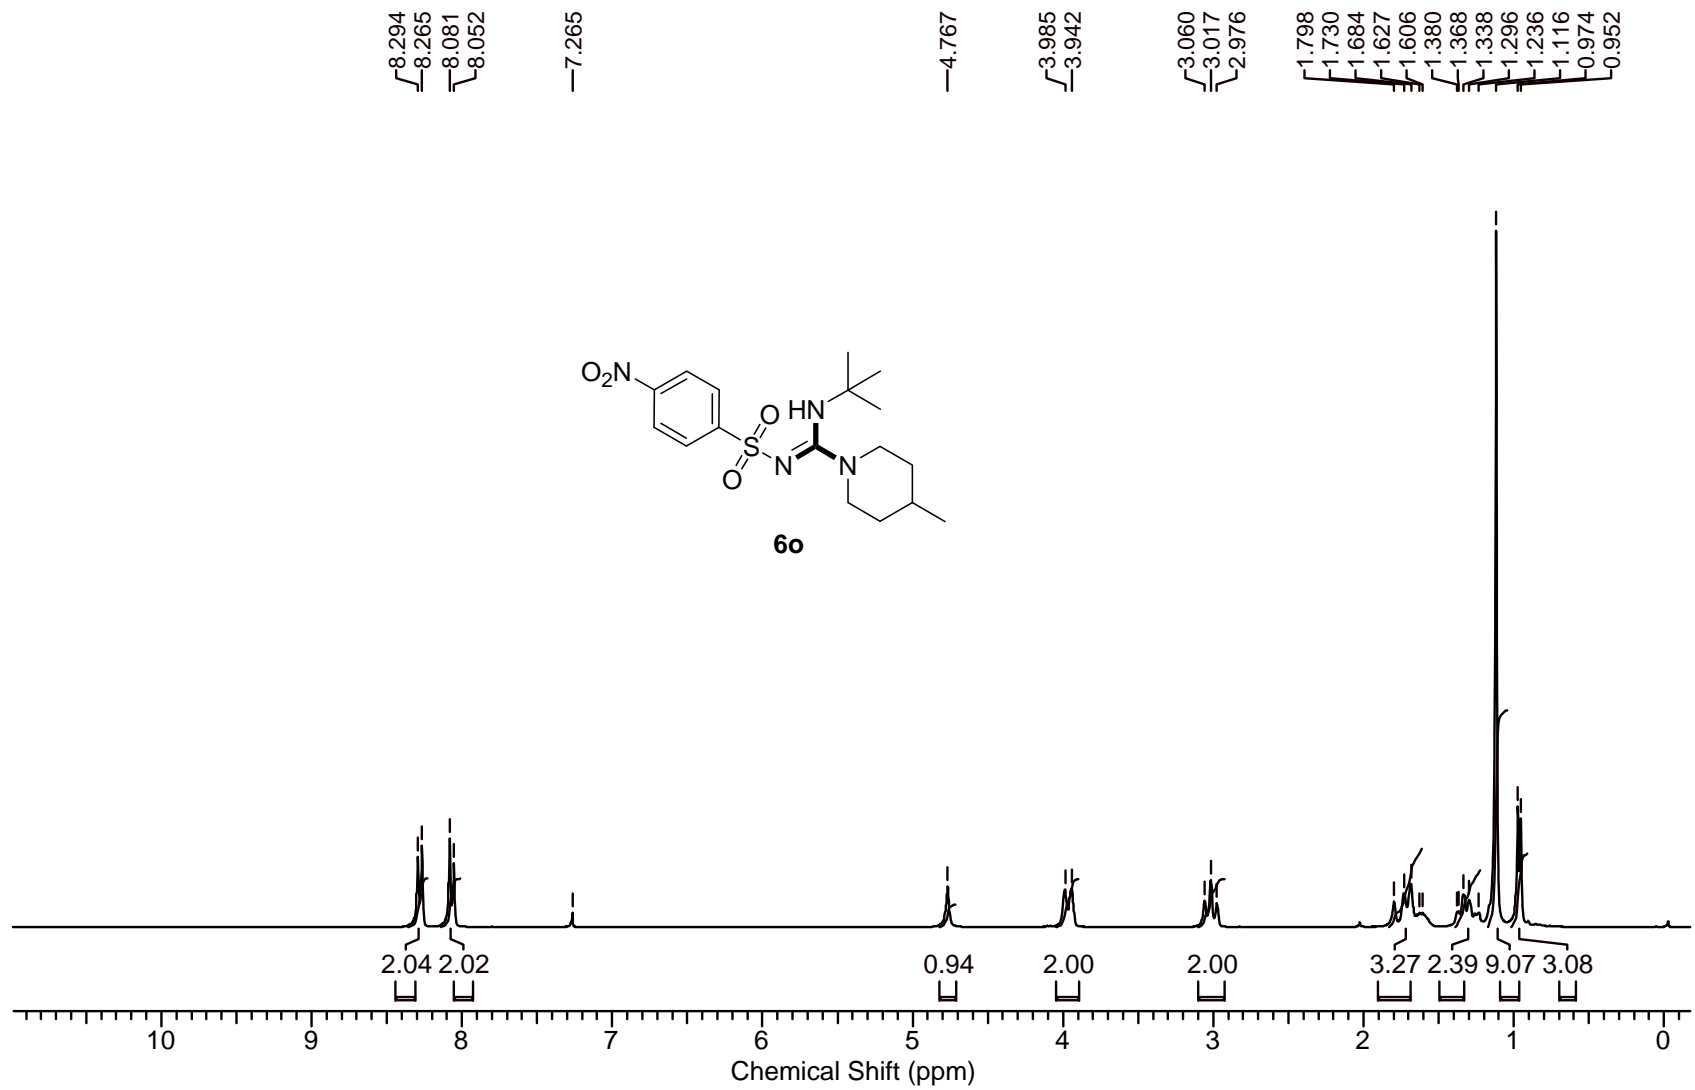

—156.243  
—150.476  
~148.749

—127.075  
—123.736

{77.421  
{77.202  
{76.998  
{76.575

—53.421  
—49.375

~33.504  
~30.814  
~29.473

—21.461

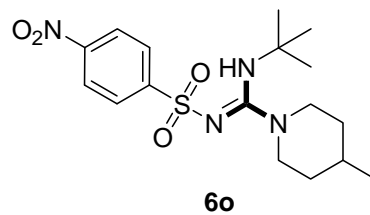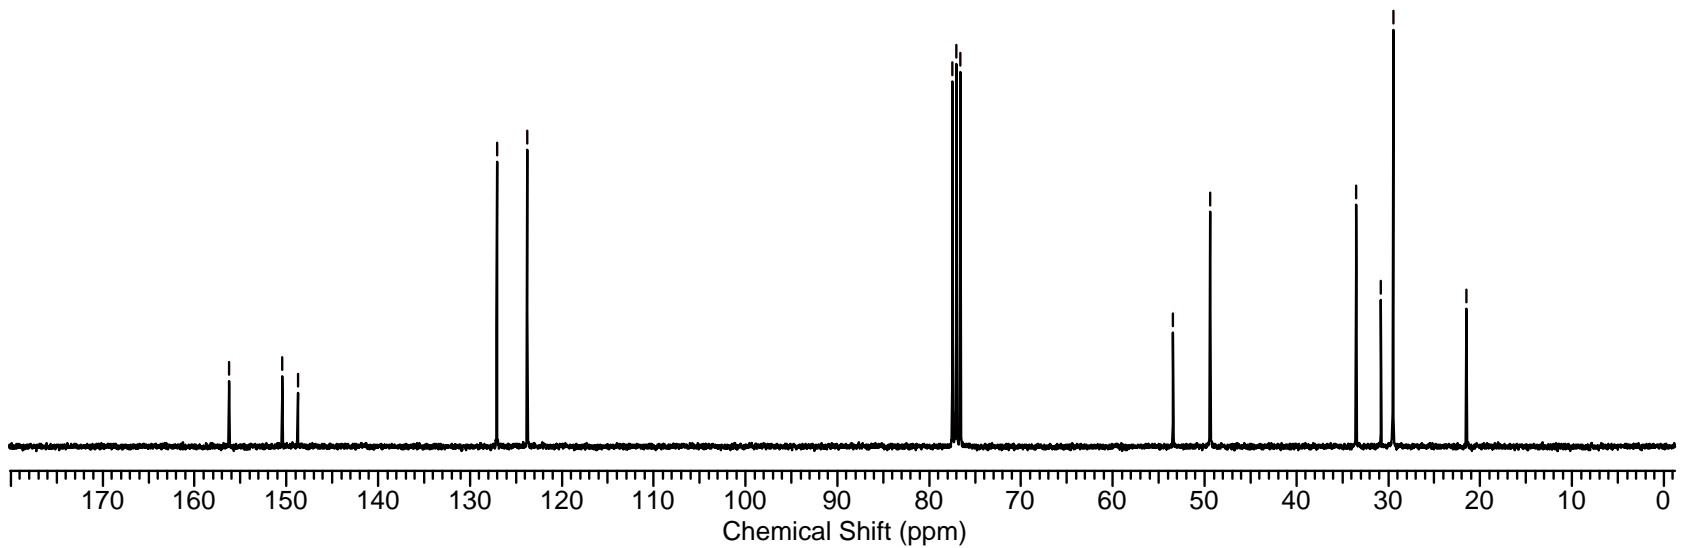

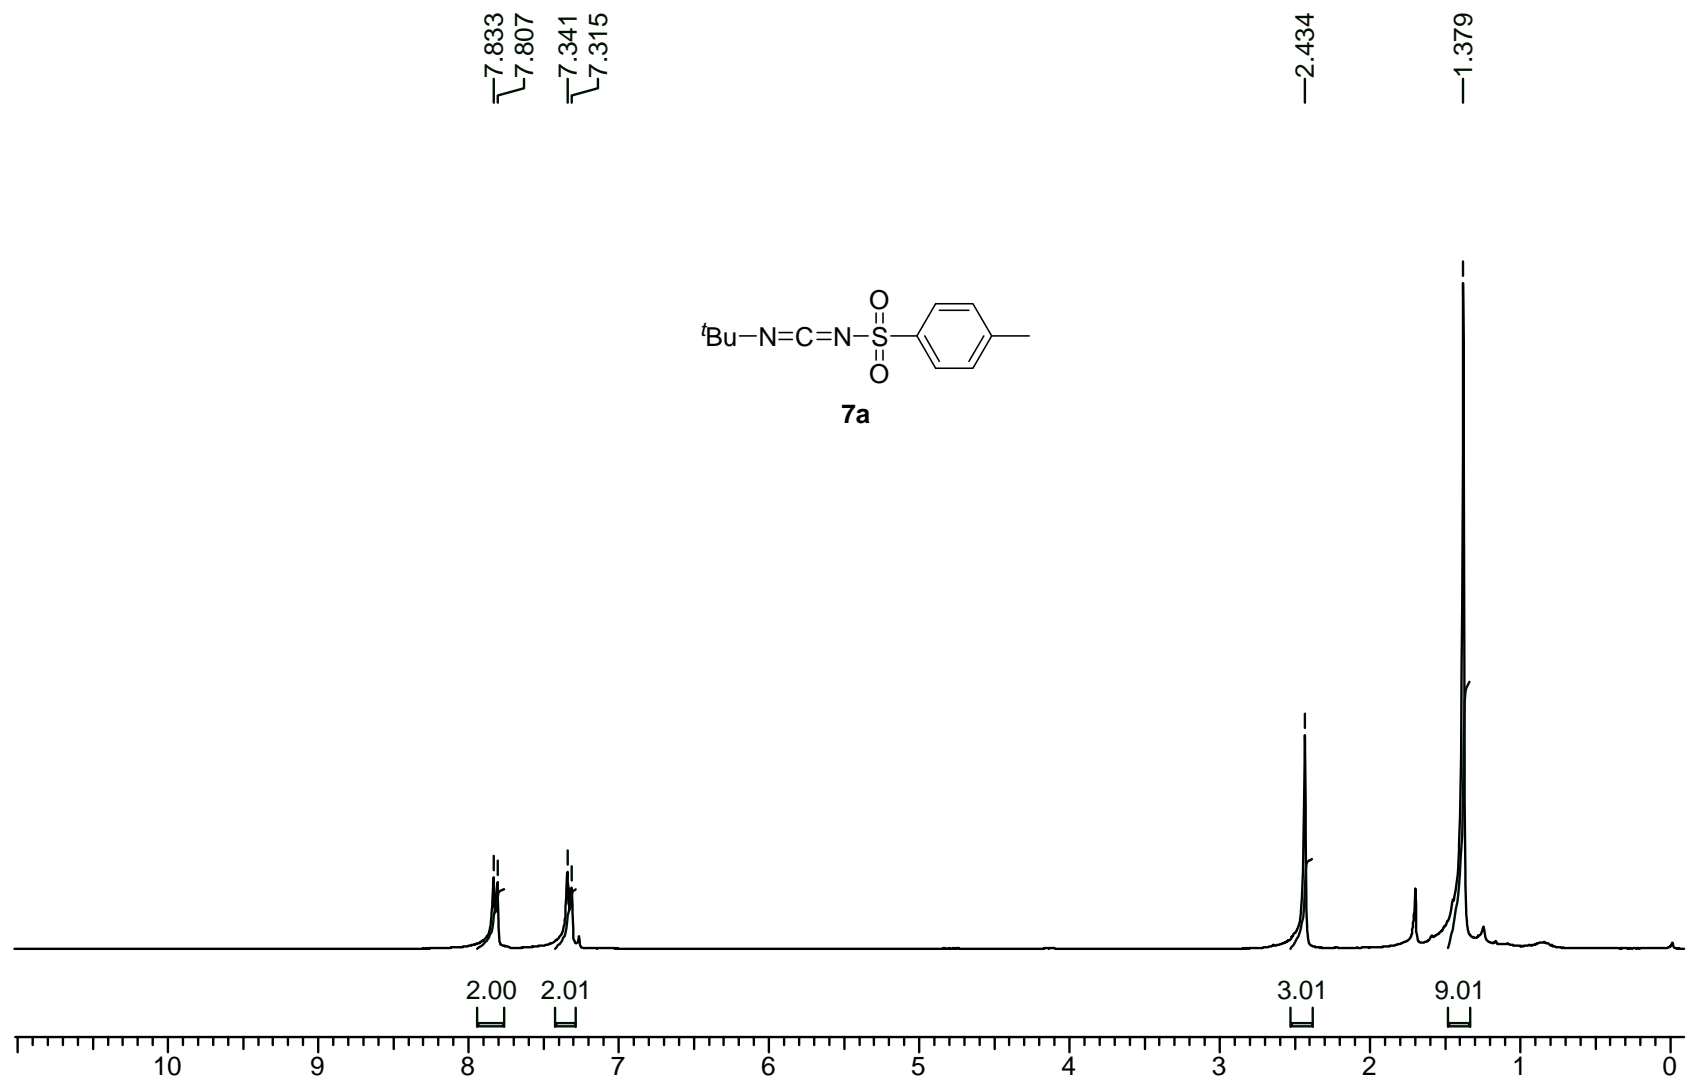

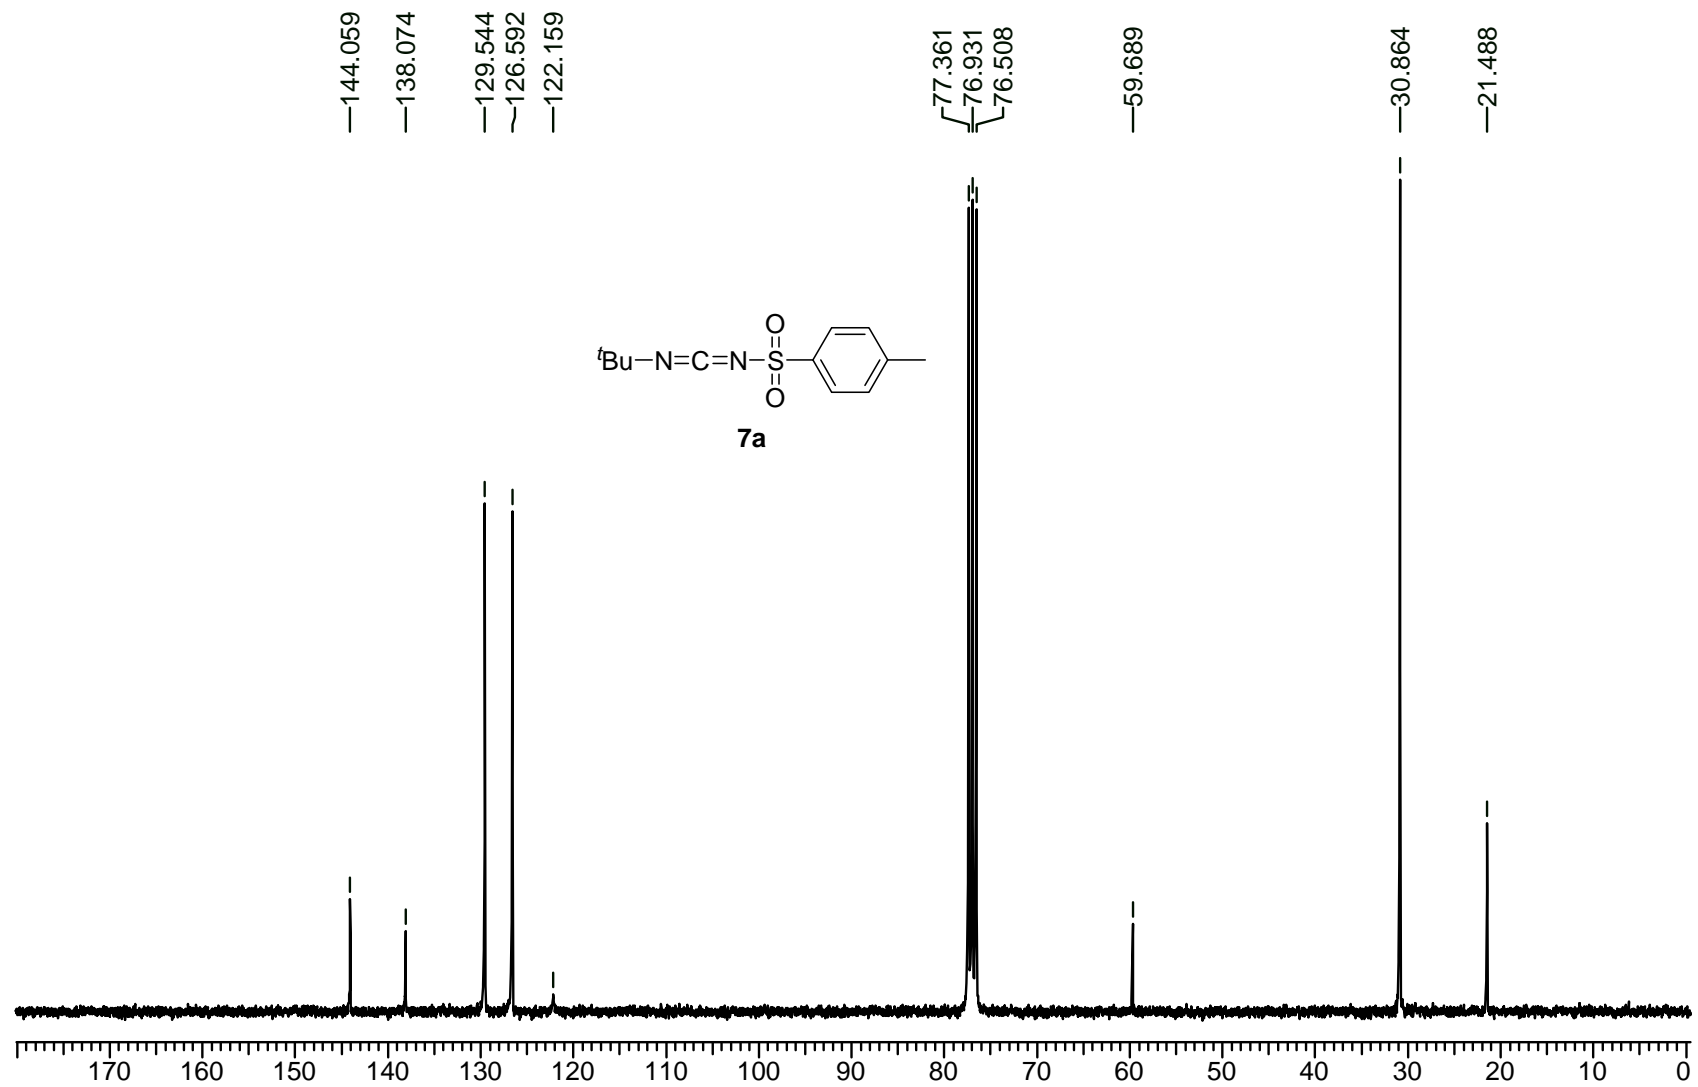

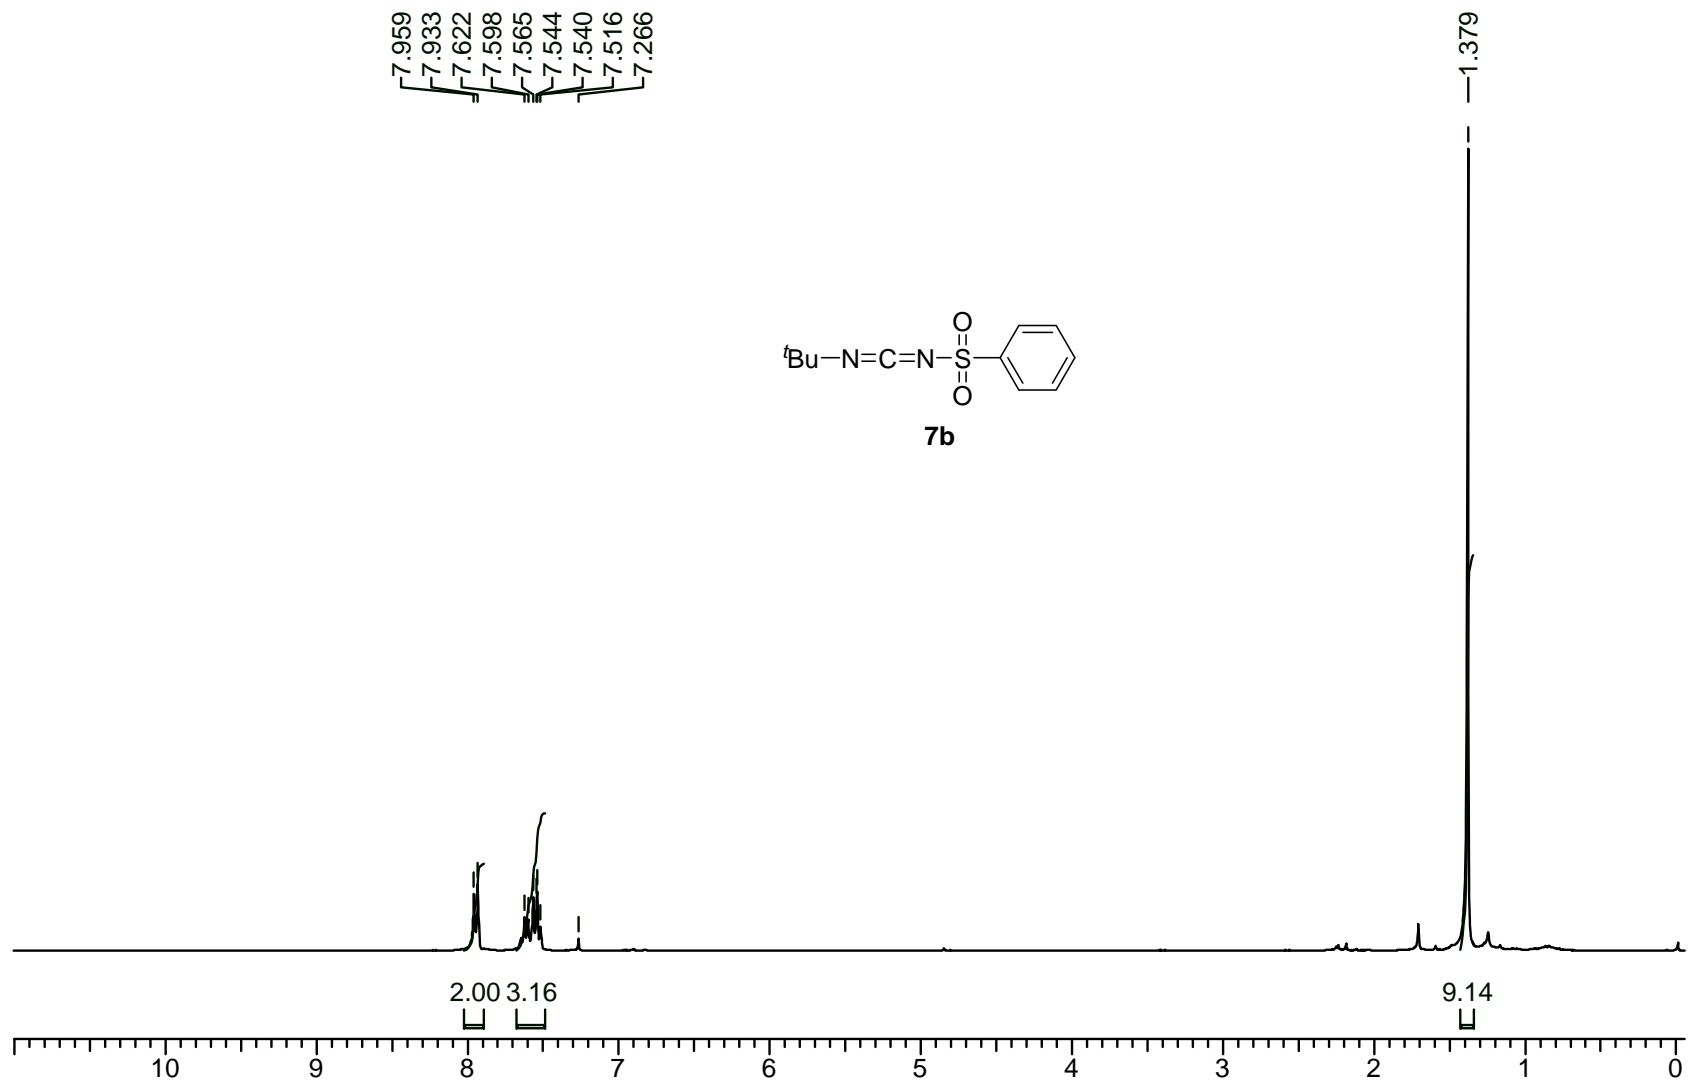

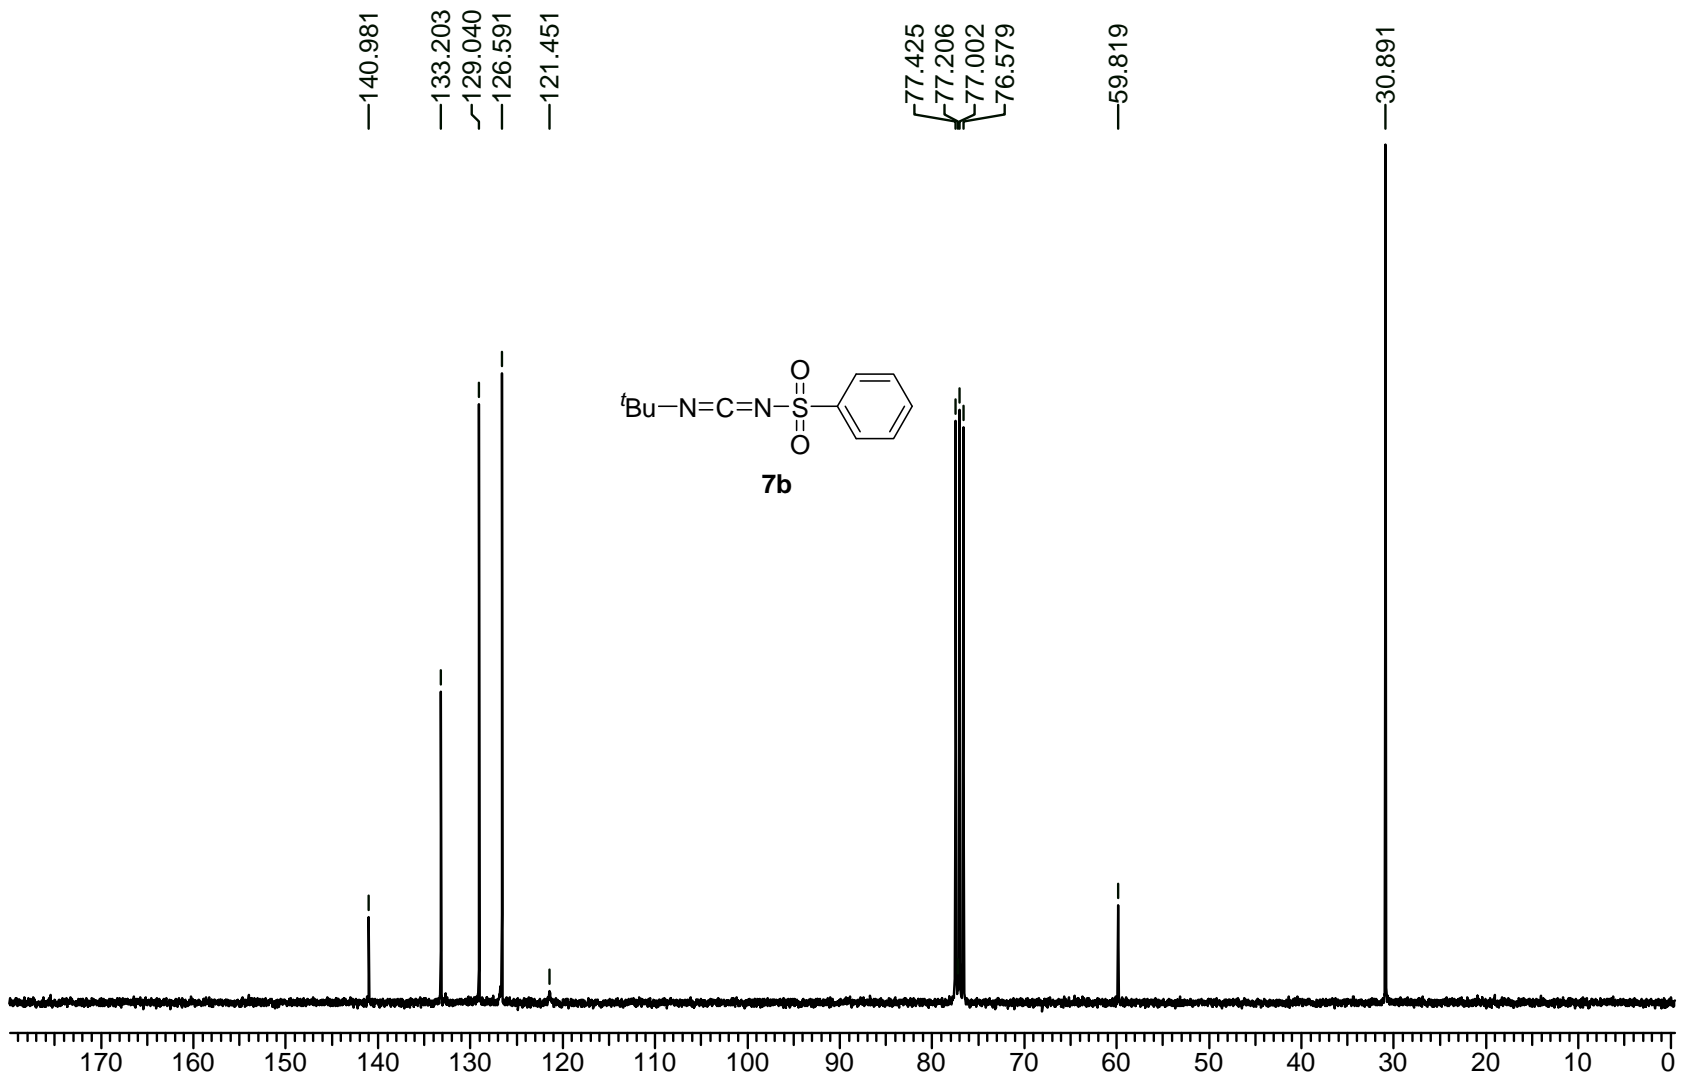

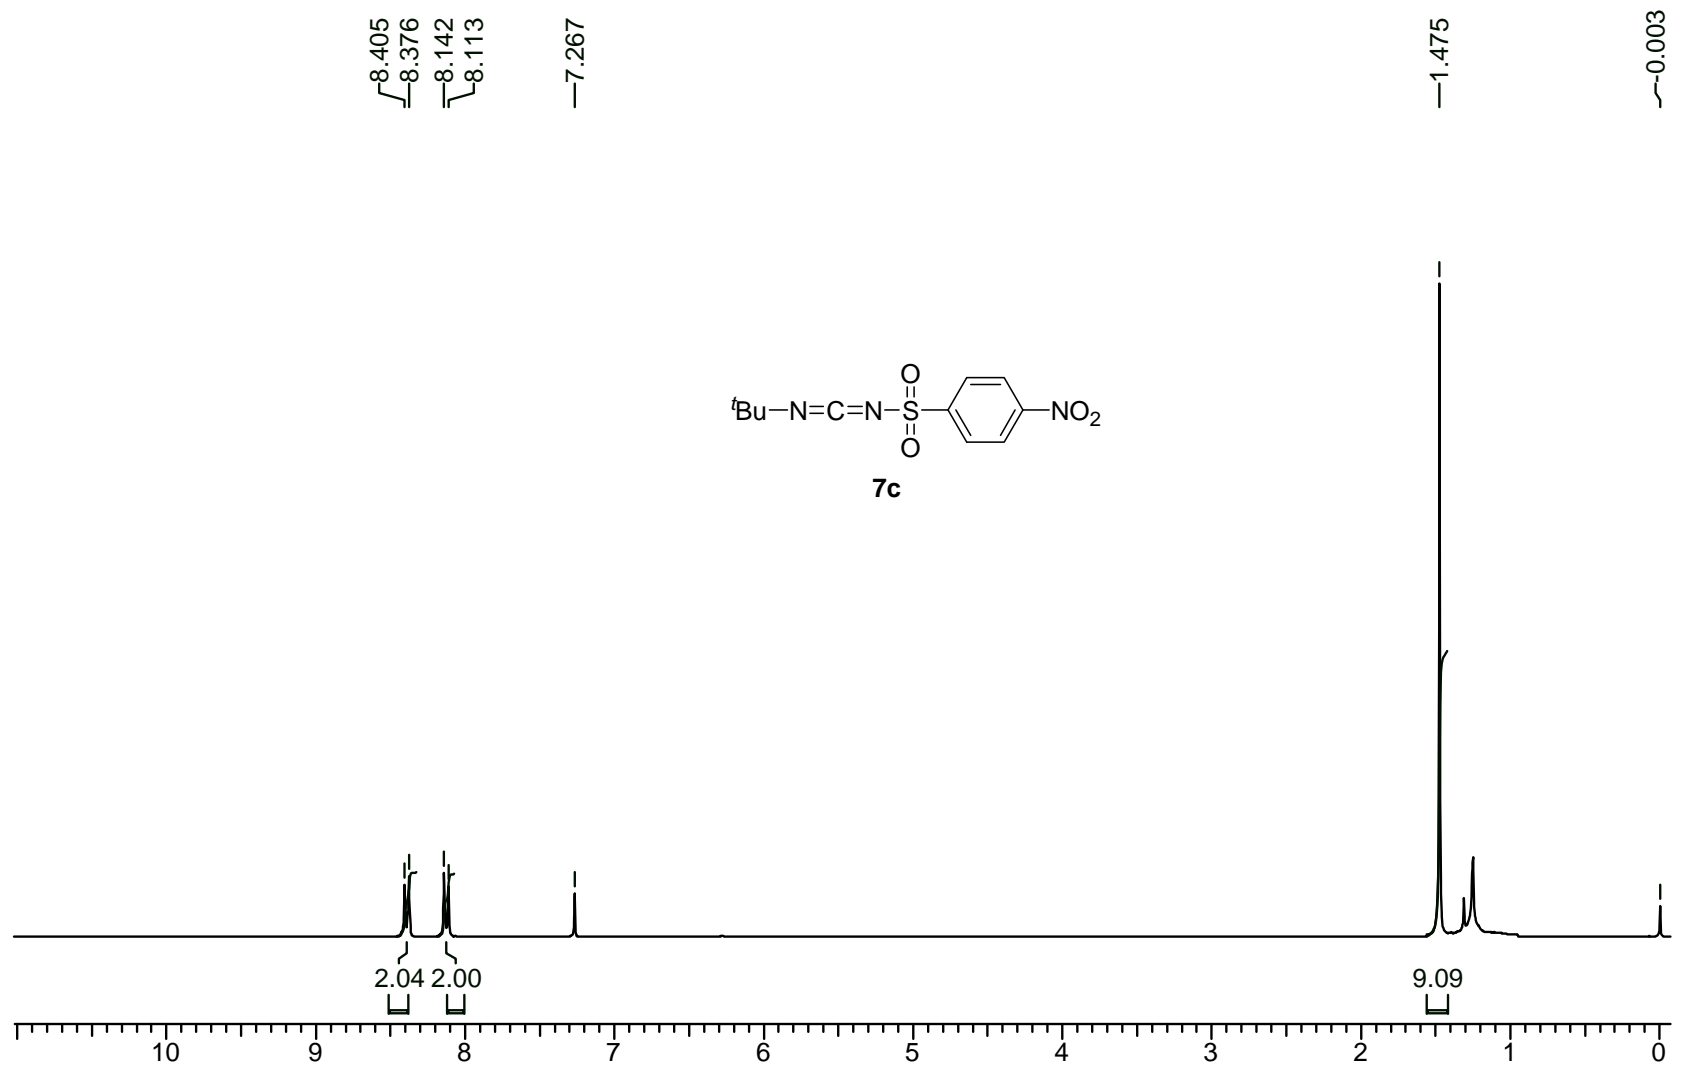



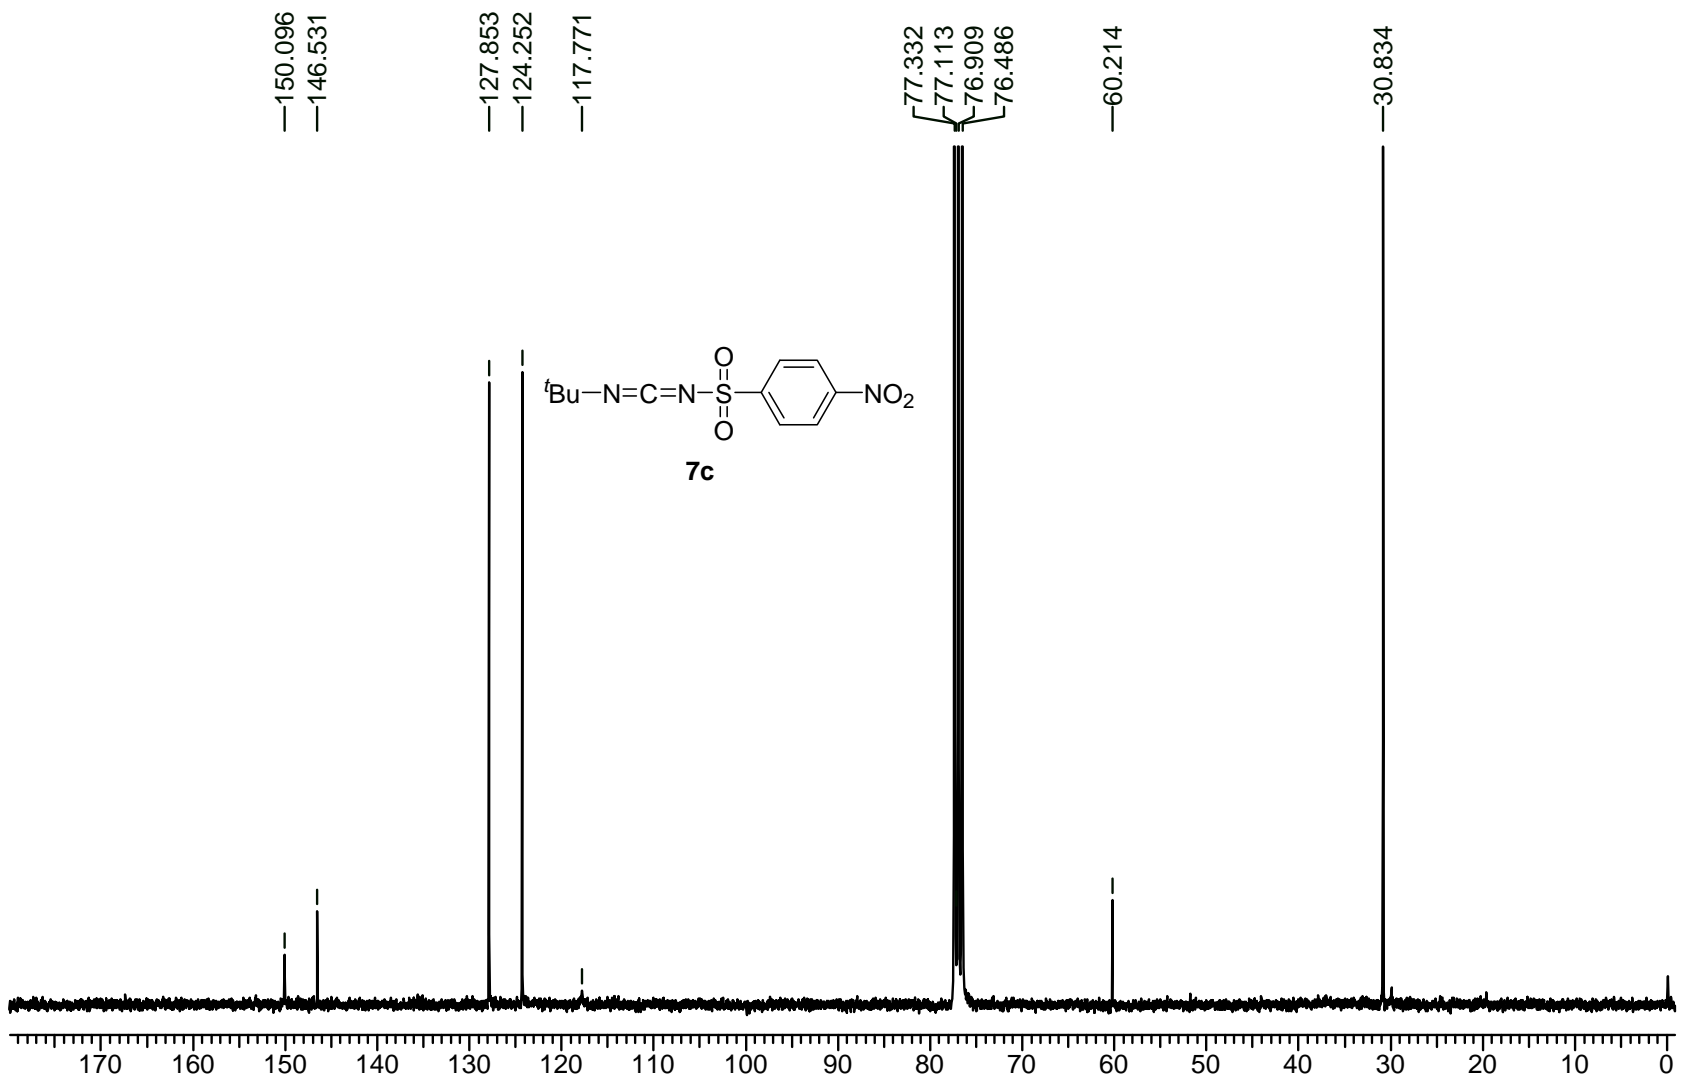

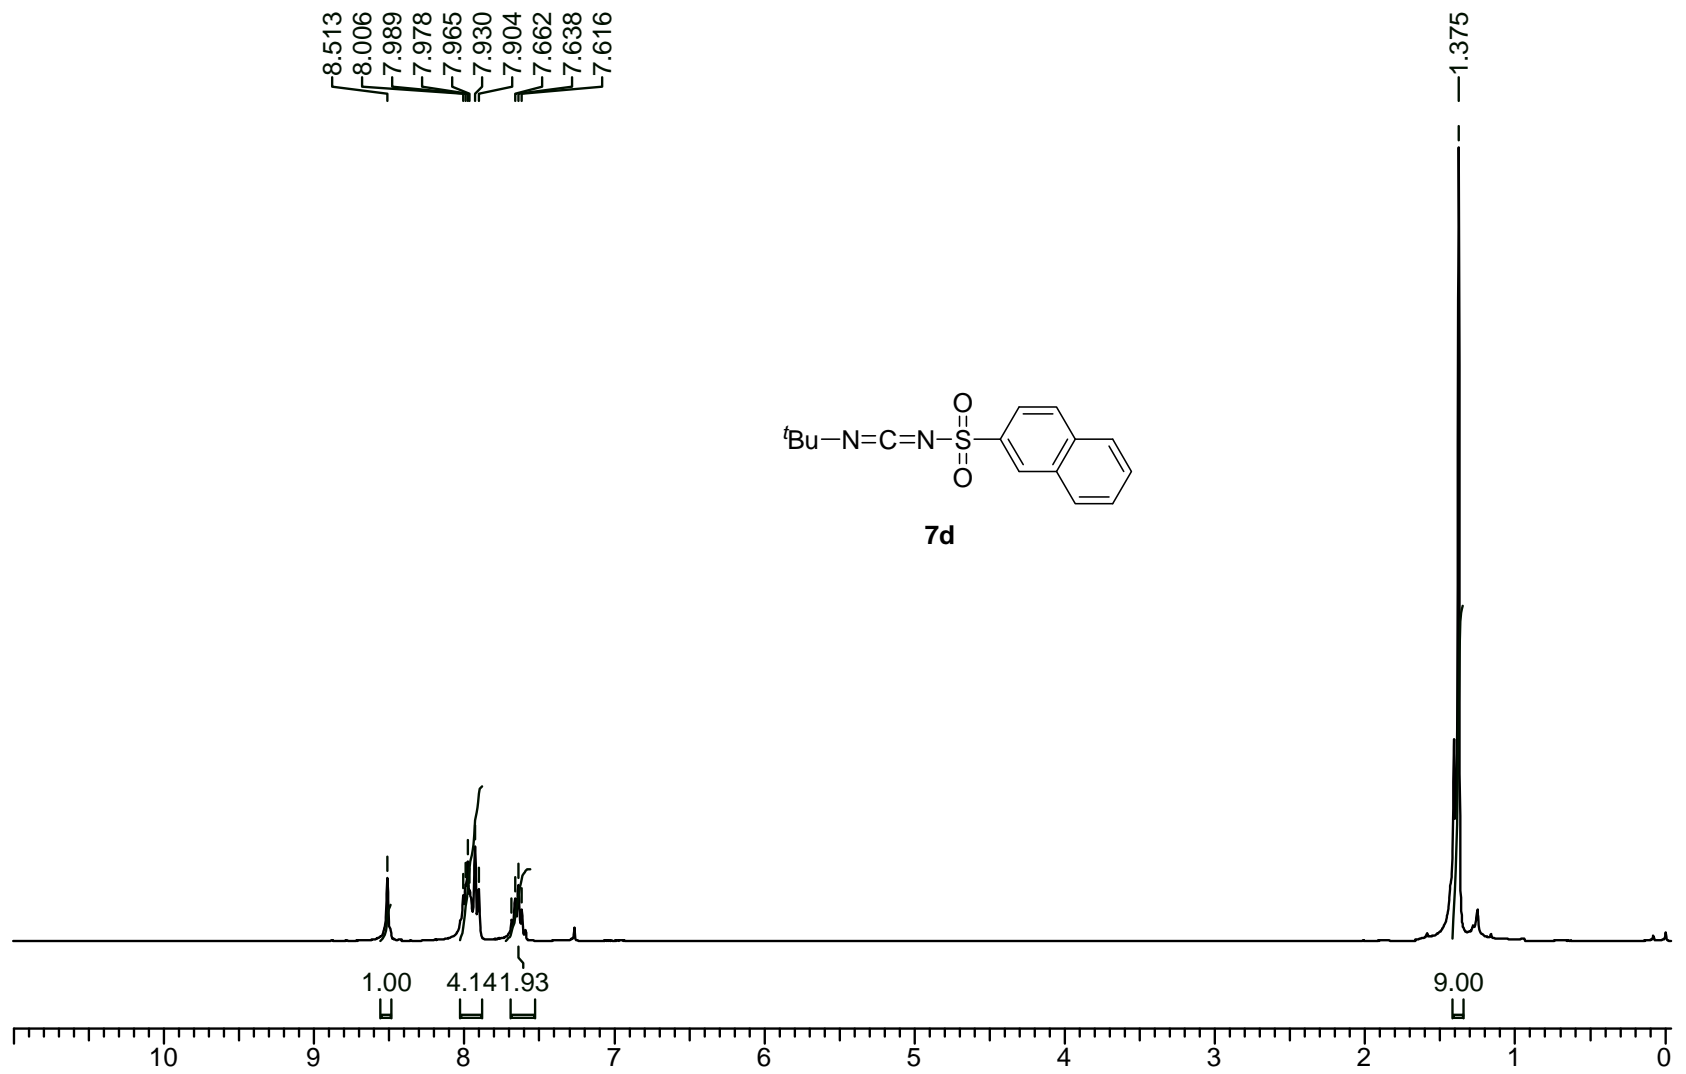

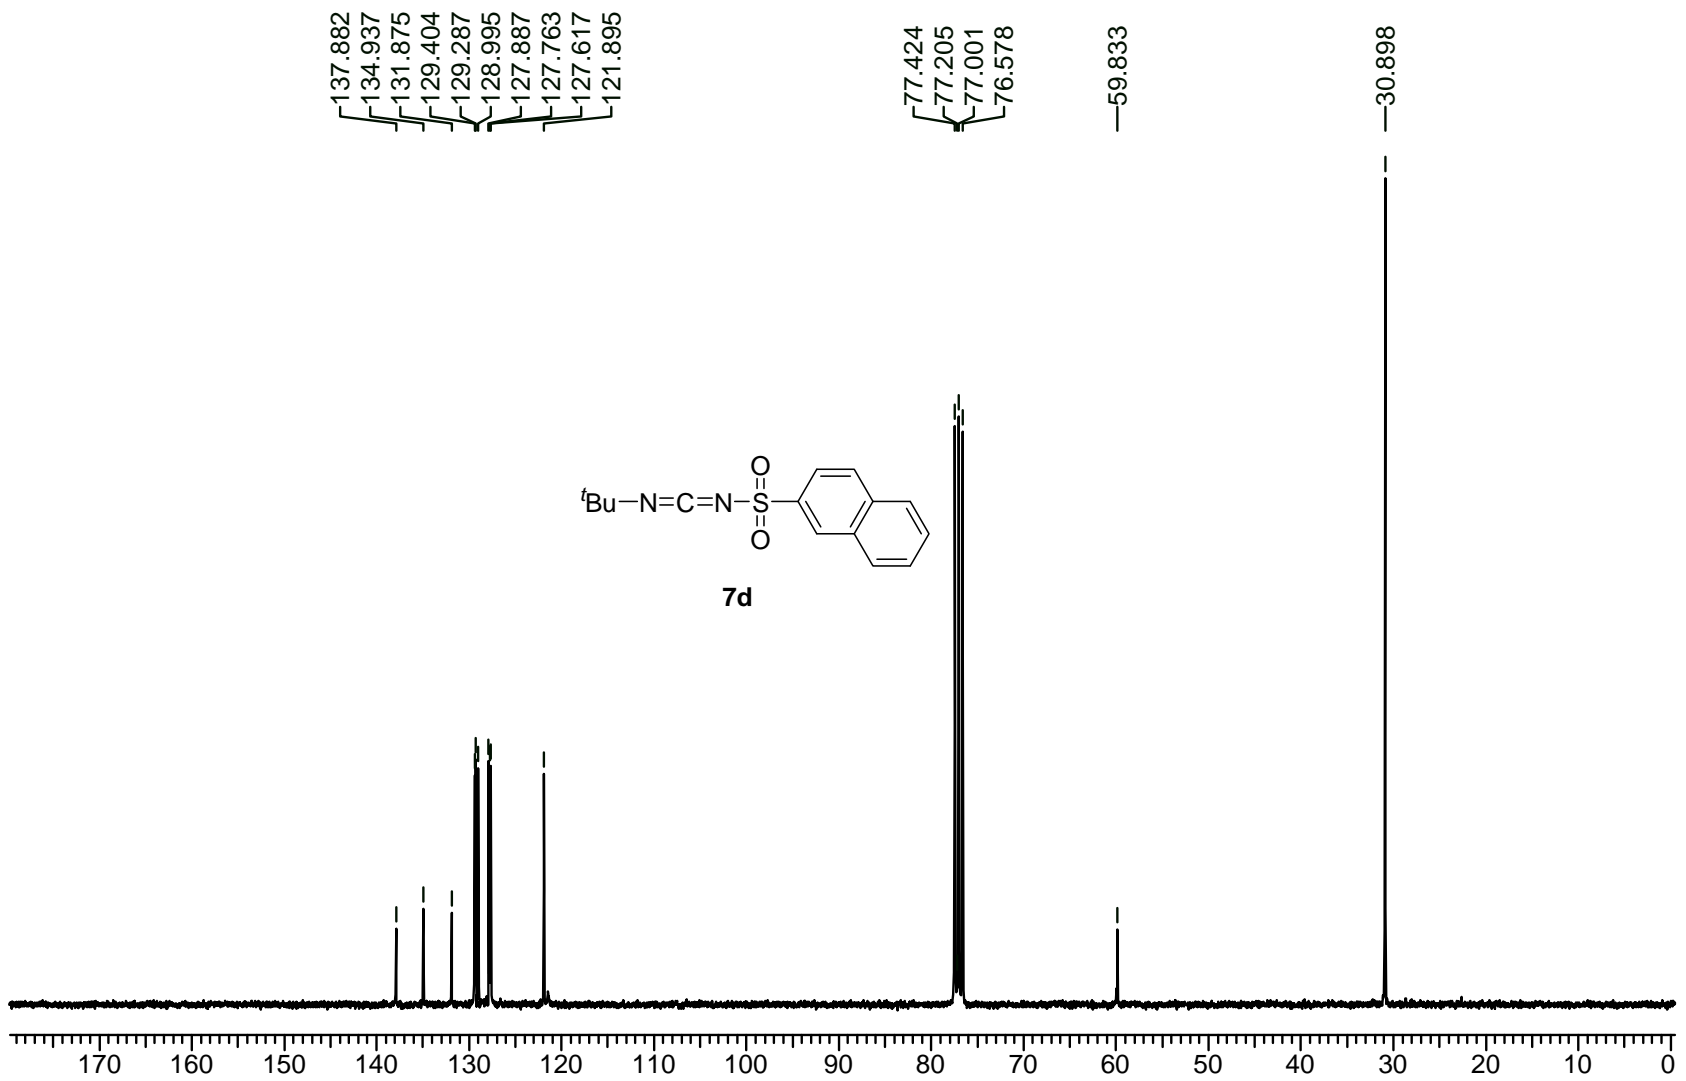

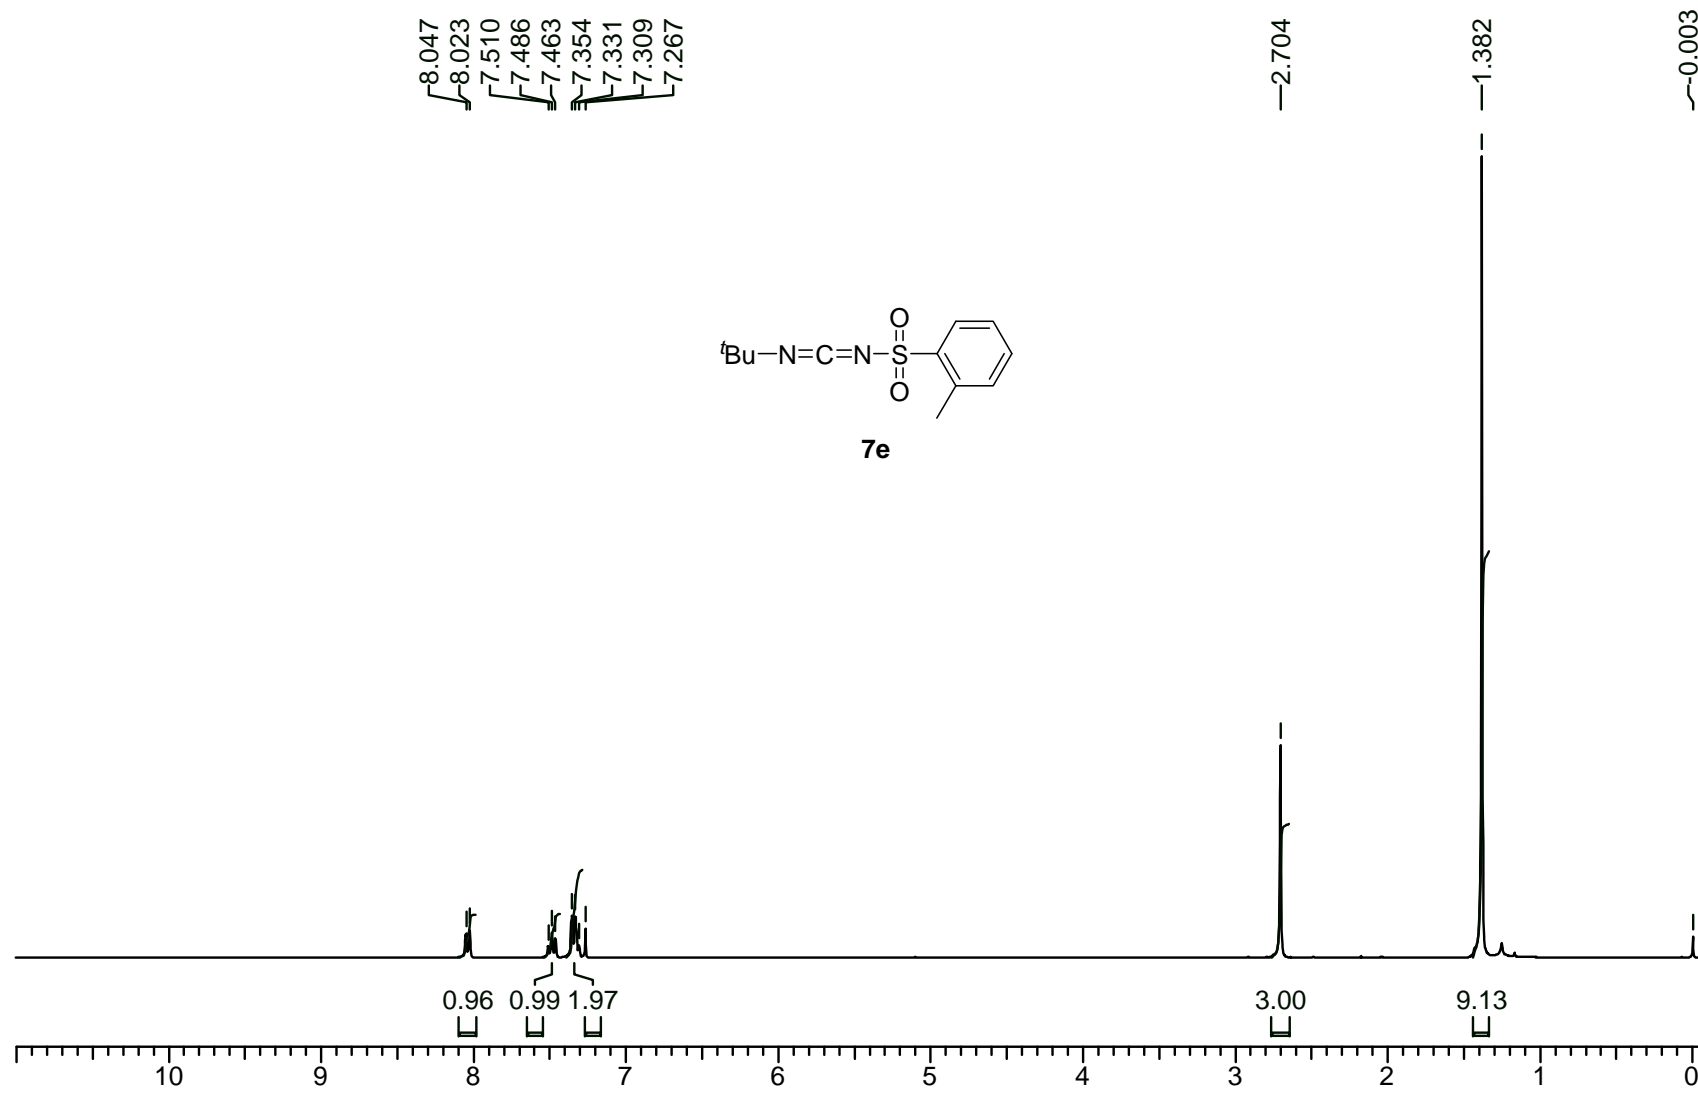

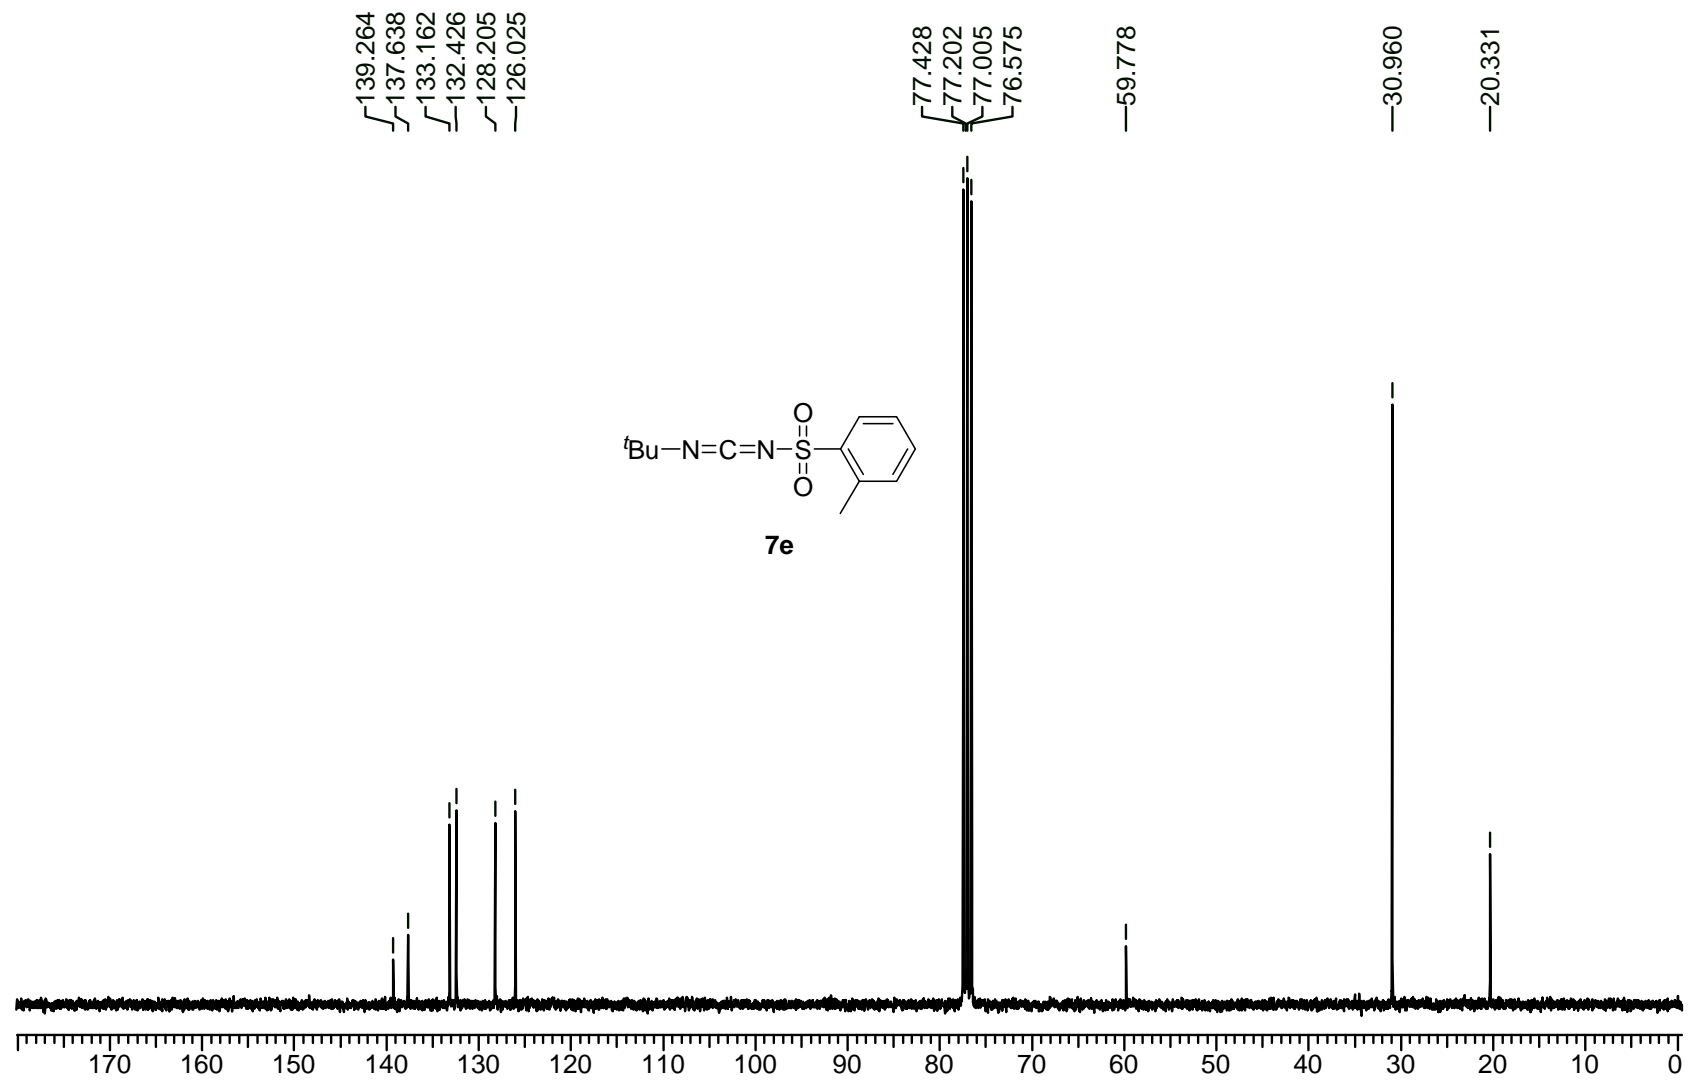

7.979  
7.954  
7.364  
7.338  
7.307  
7.293  
7.266  
7.149  
7.126  
—5.517  
4.437  
4.364  
—3.812  
—2.459

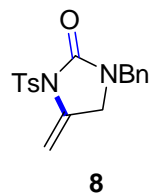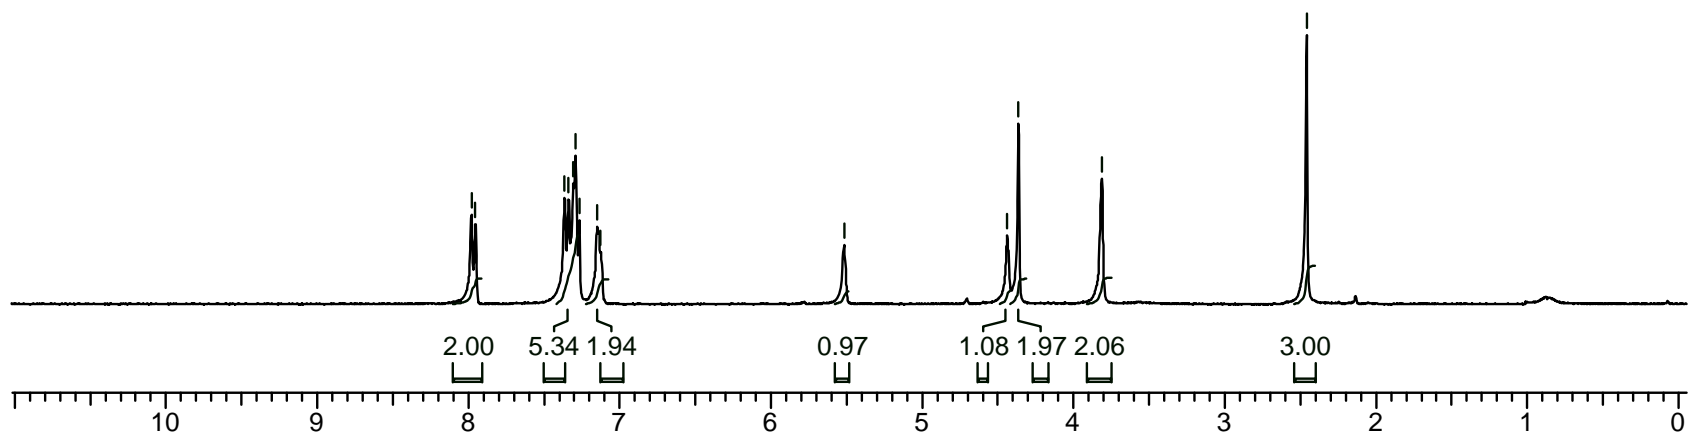

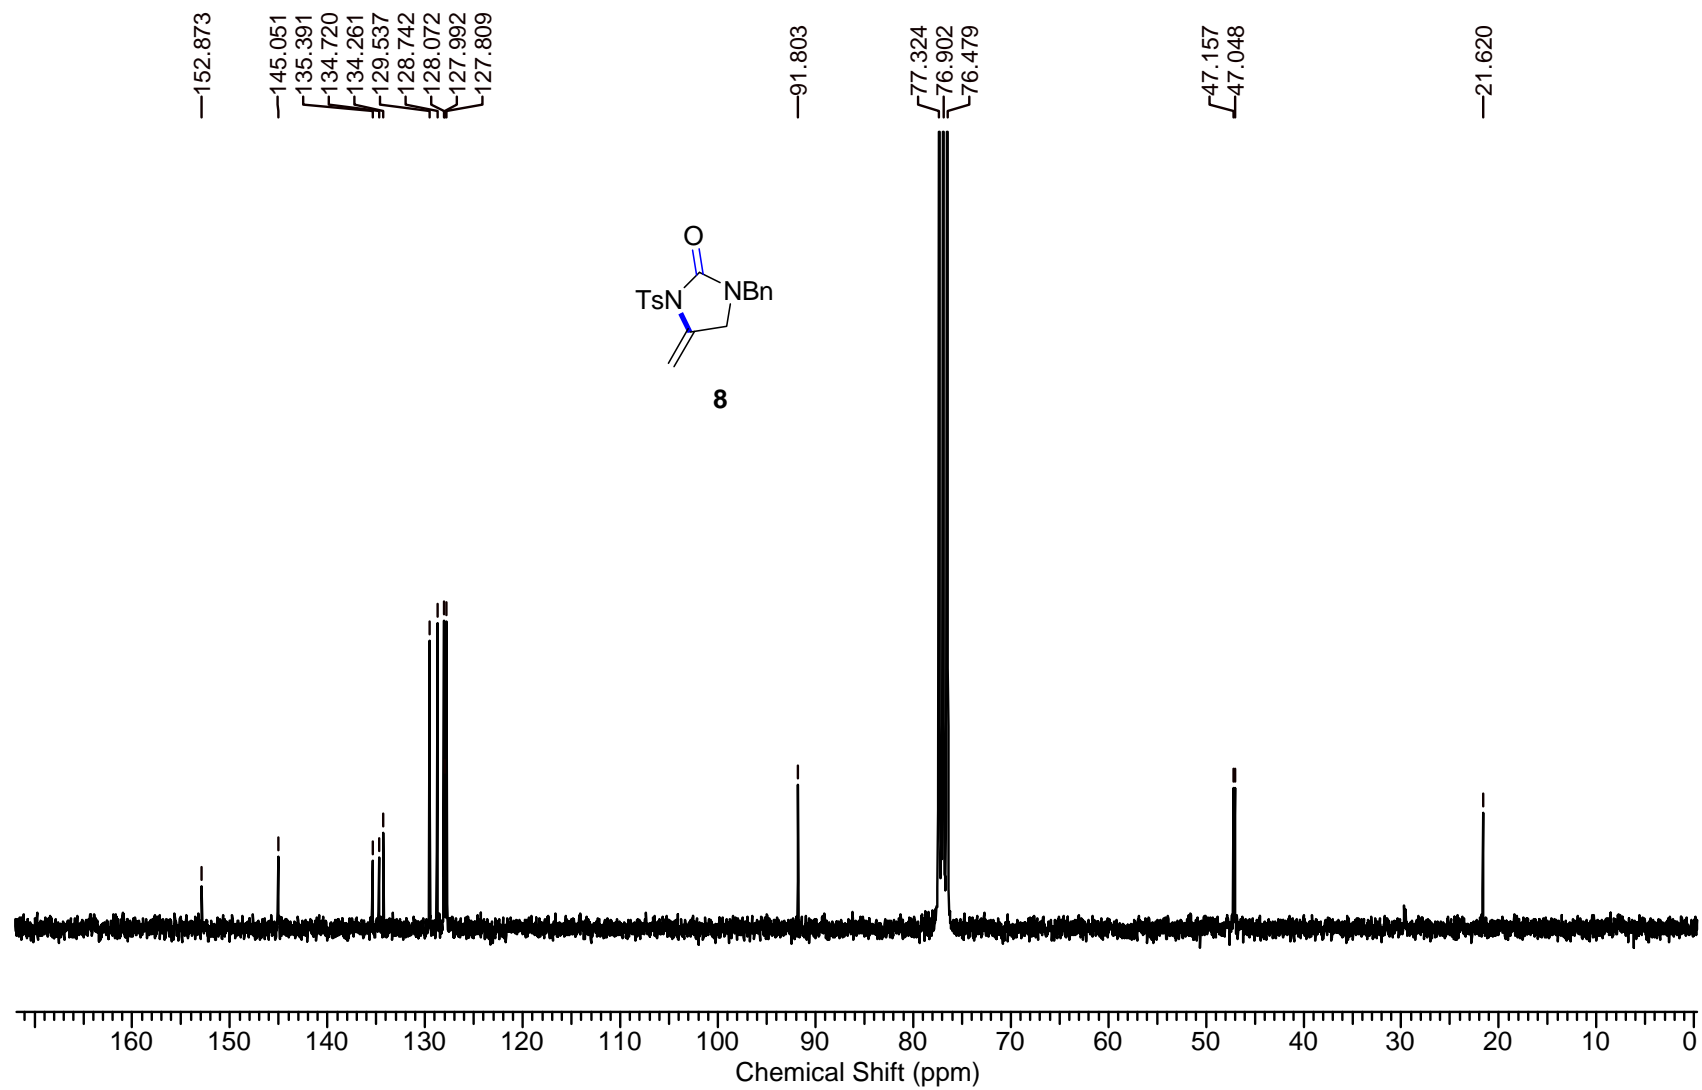

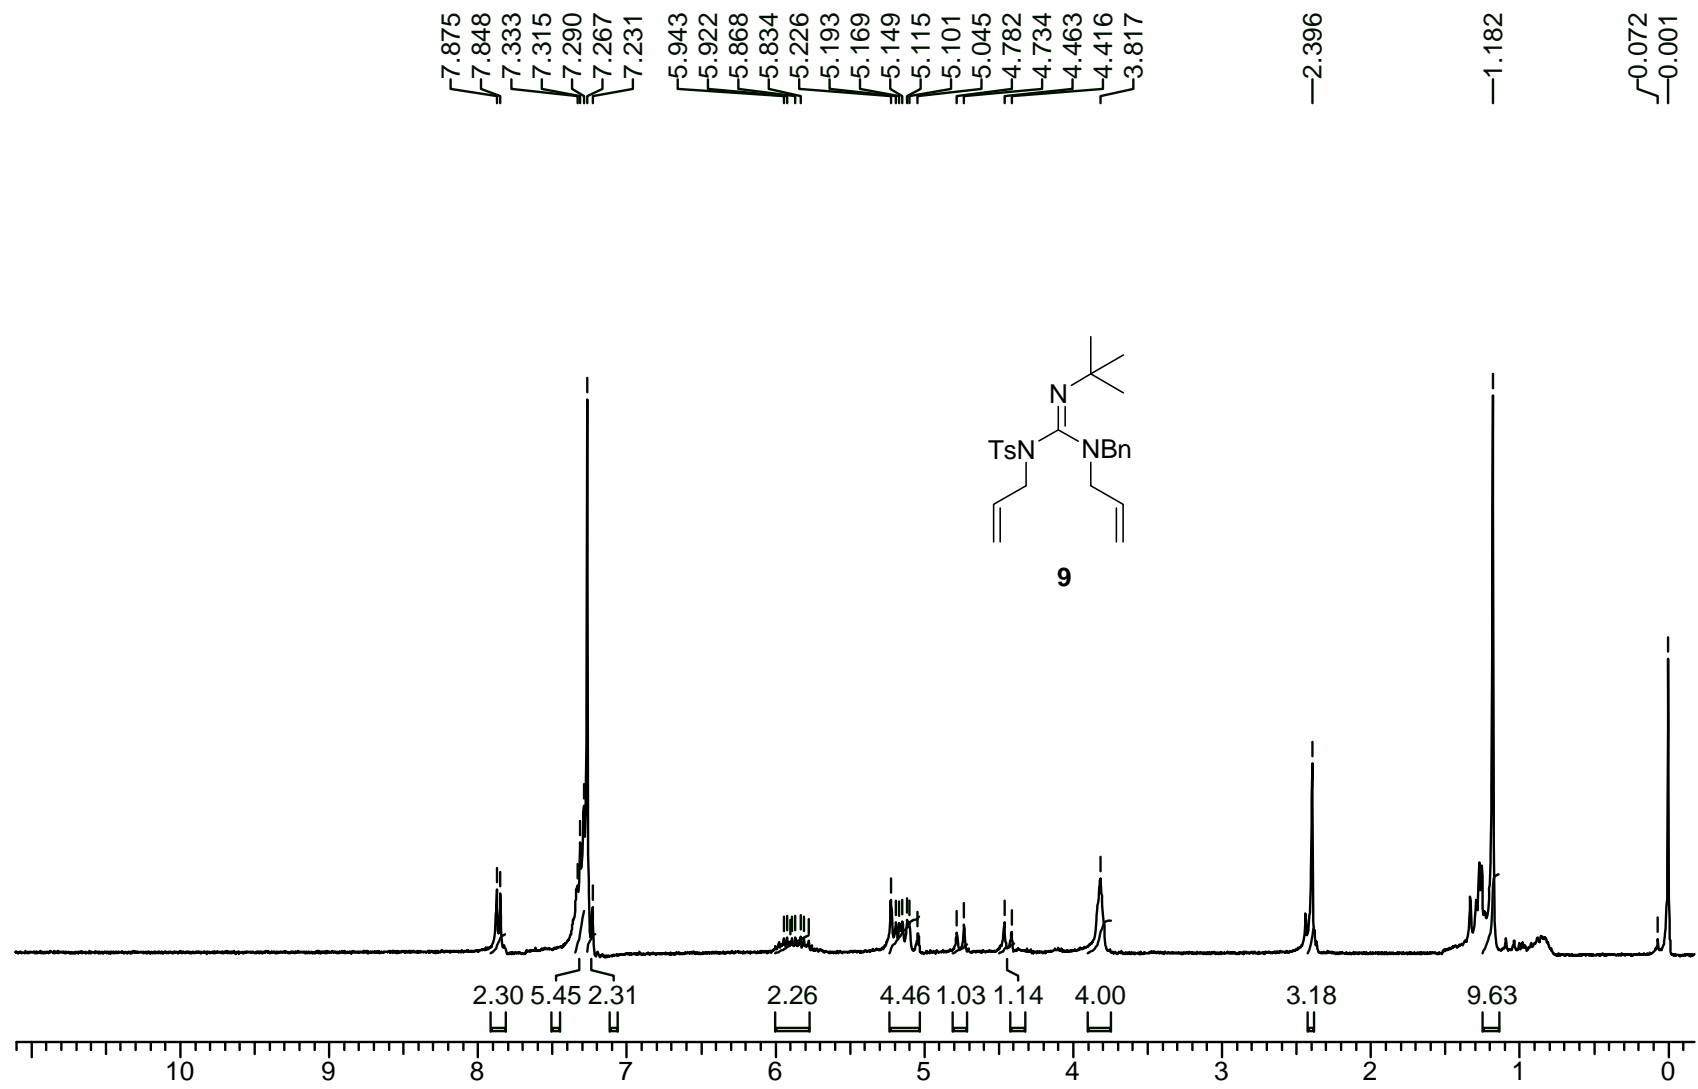



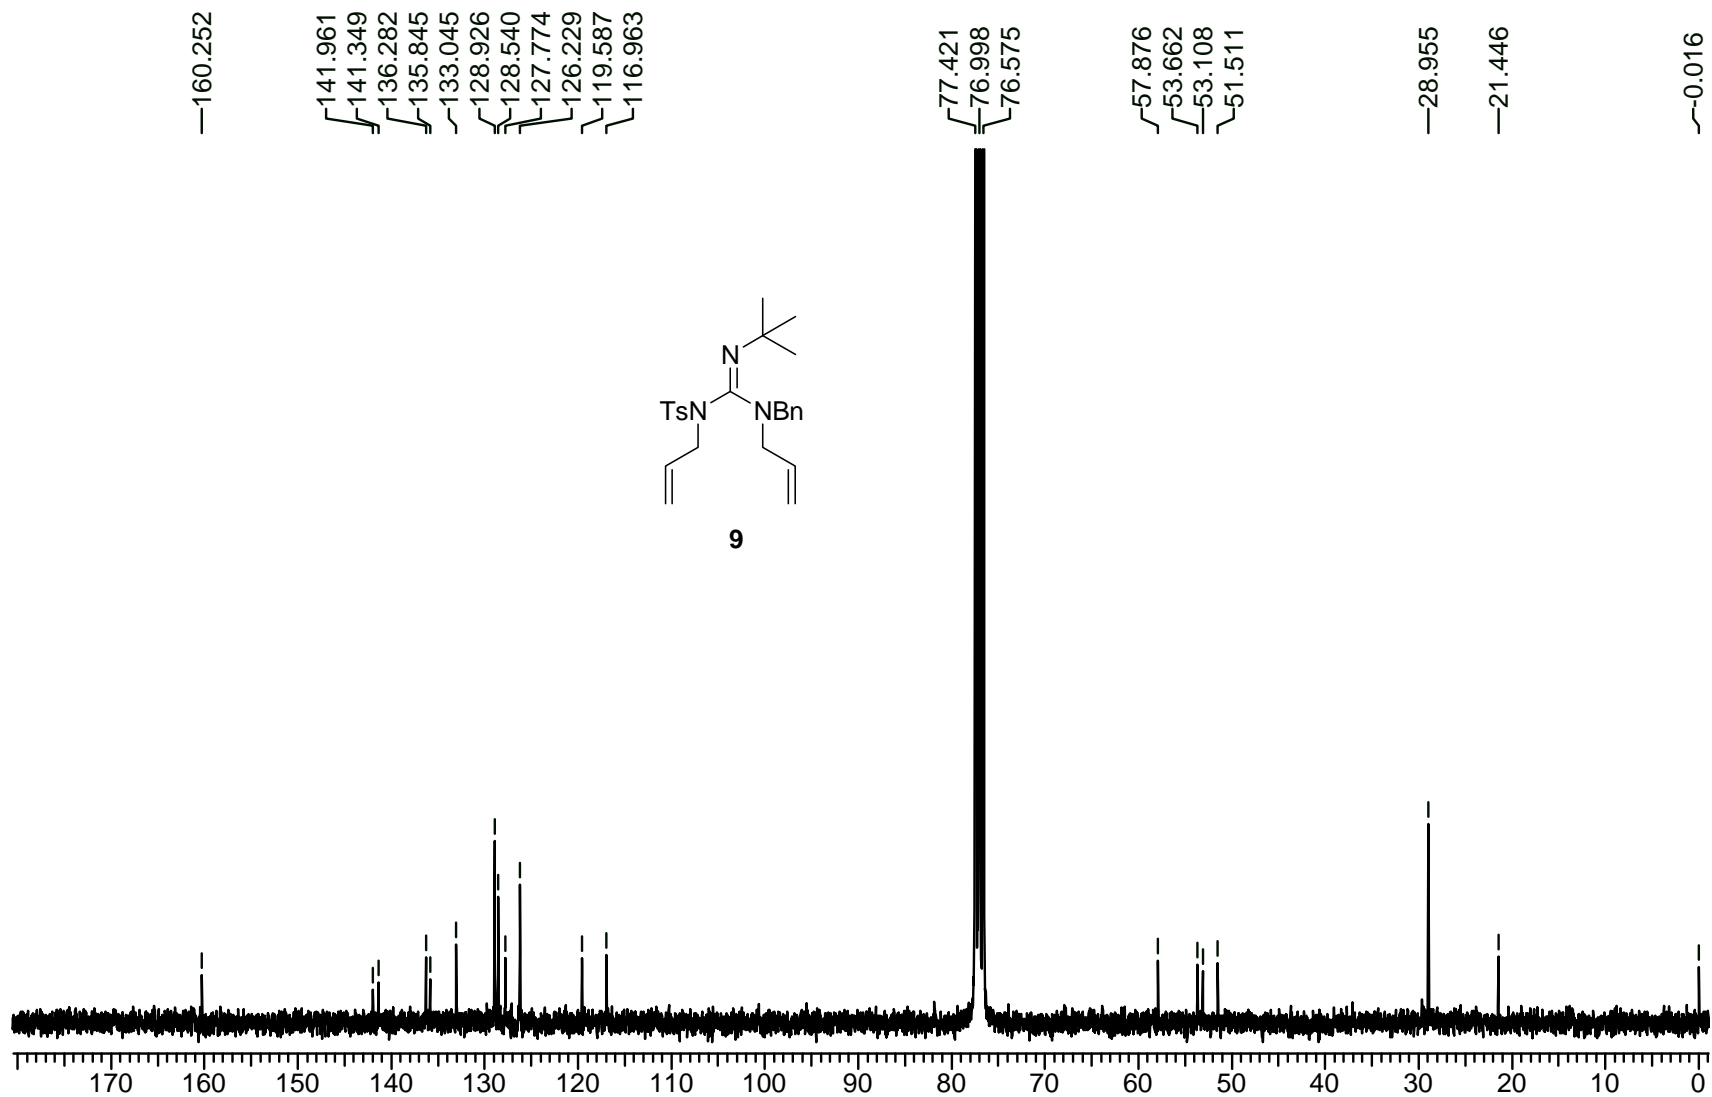

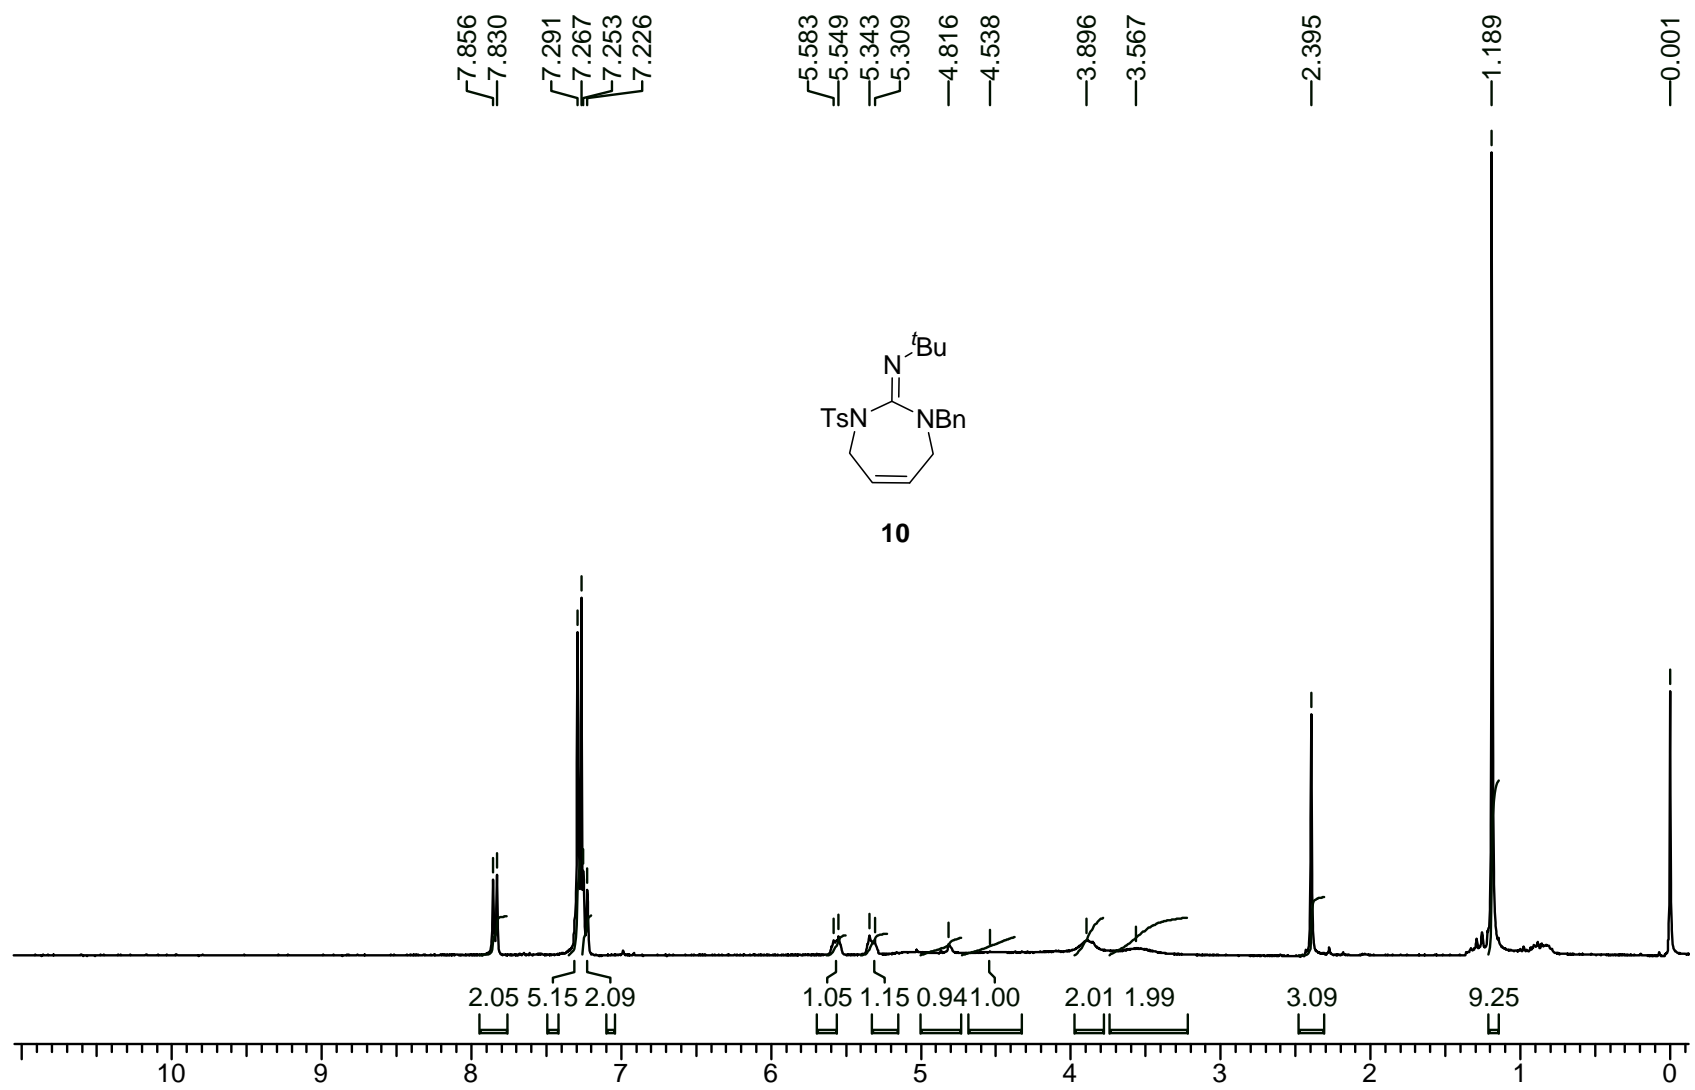

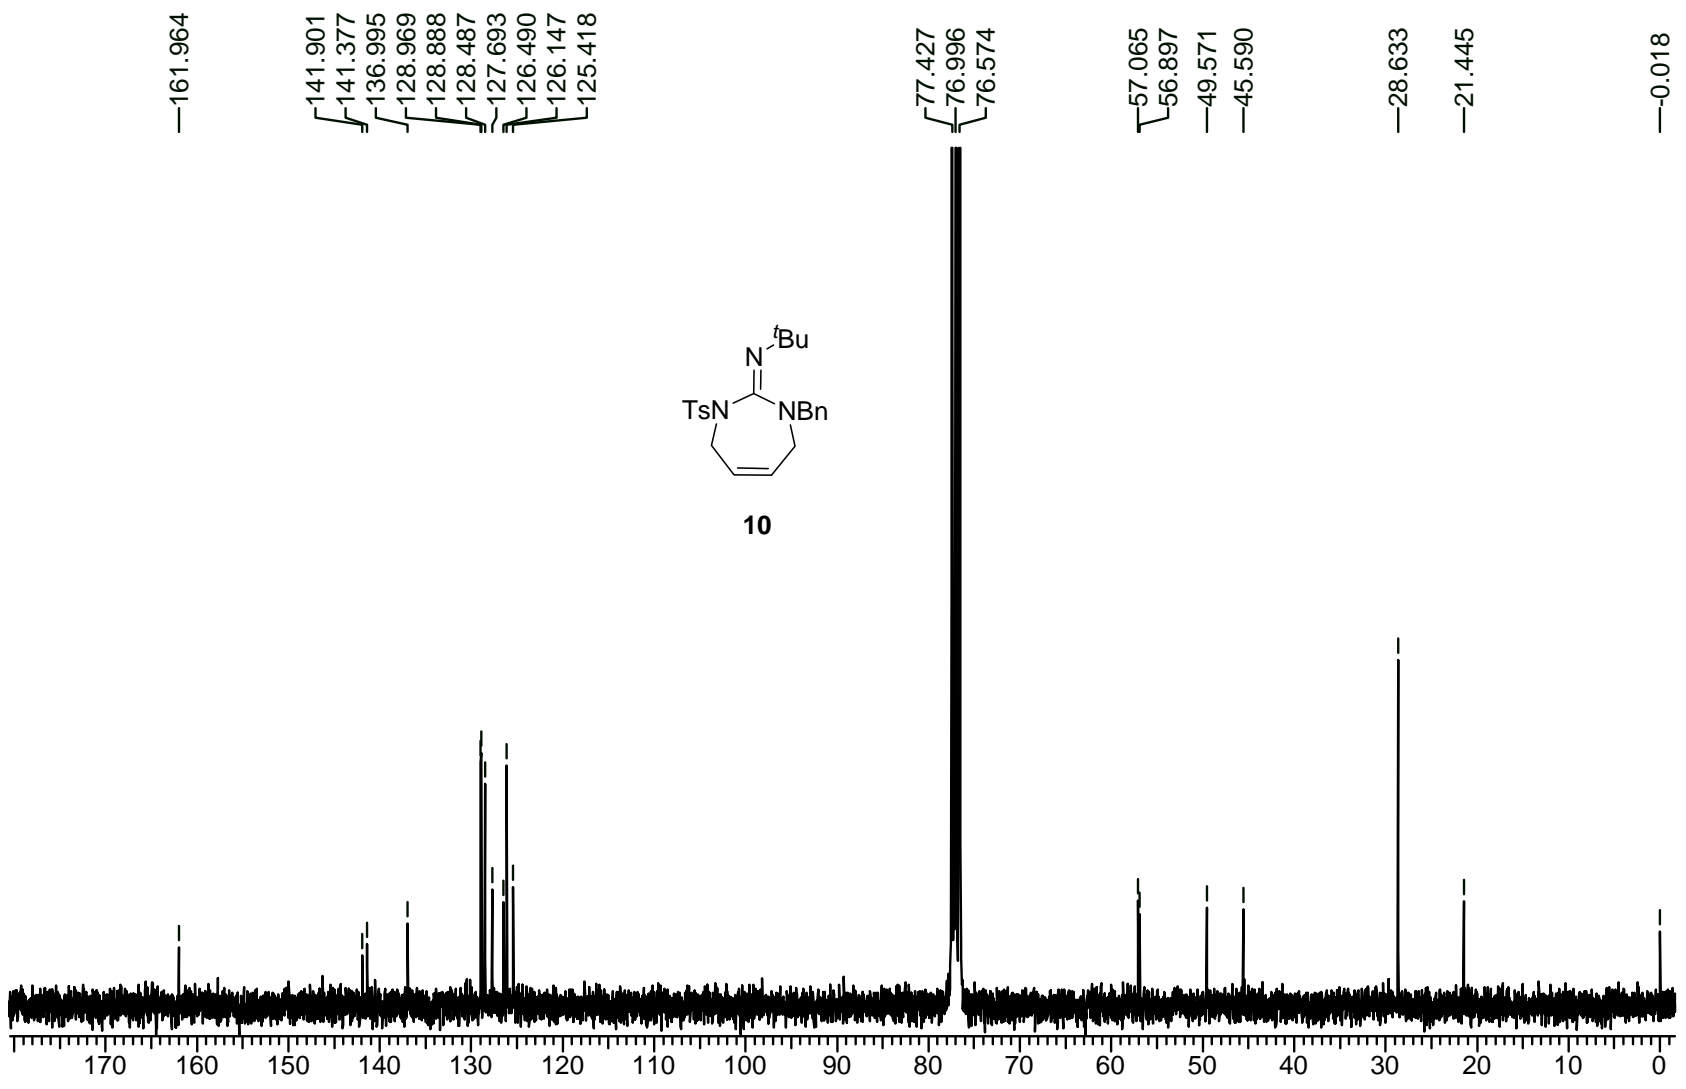

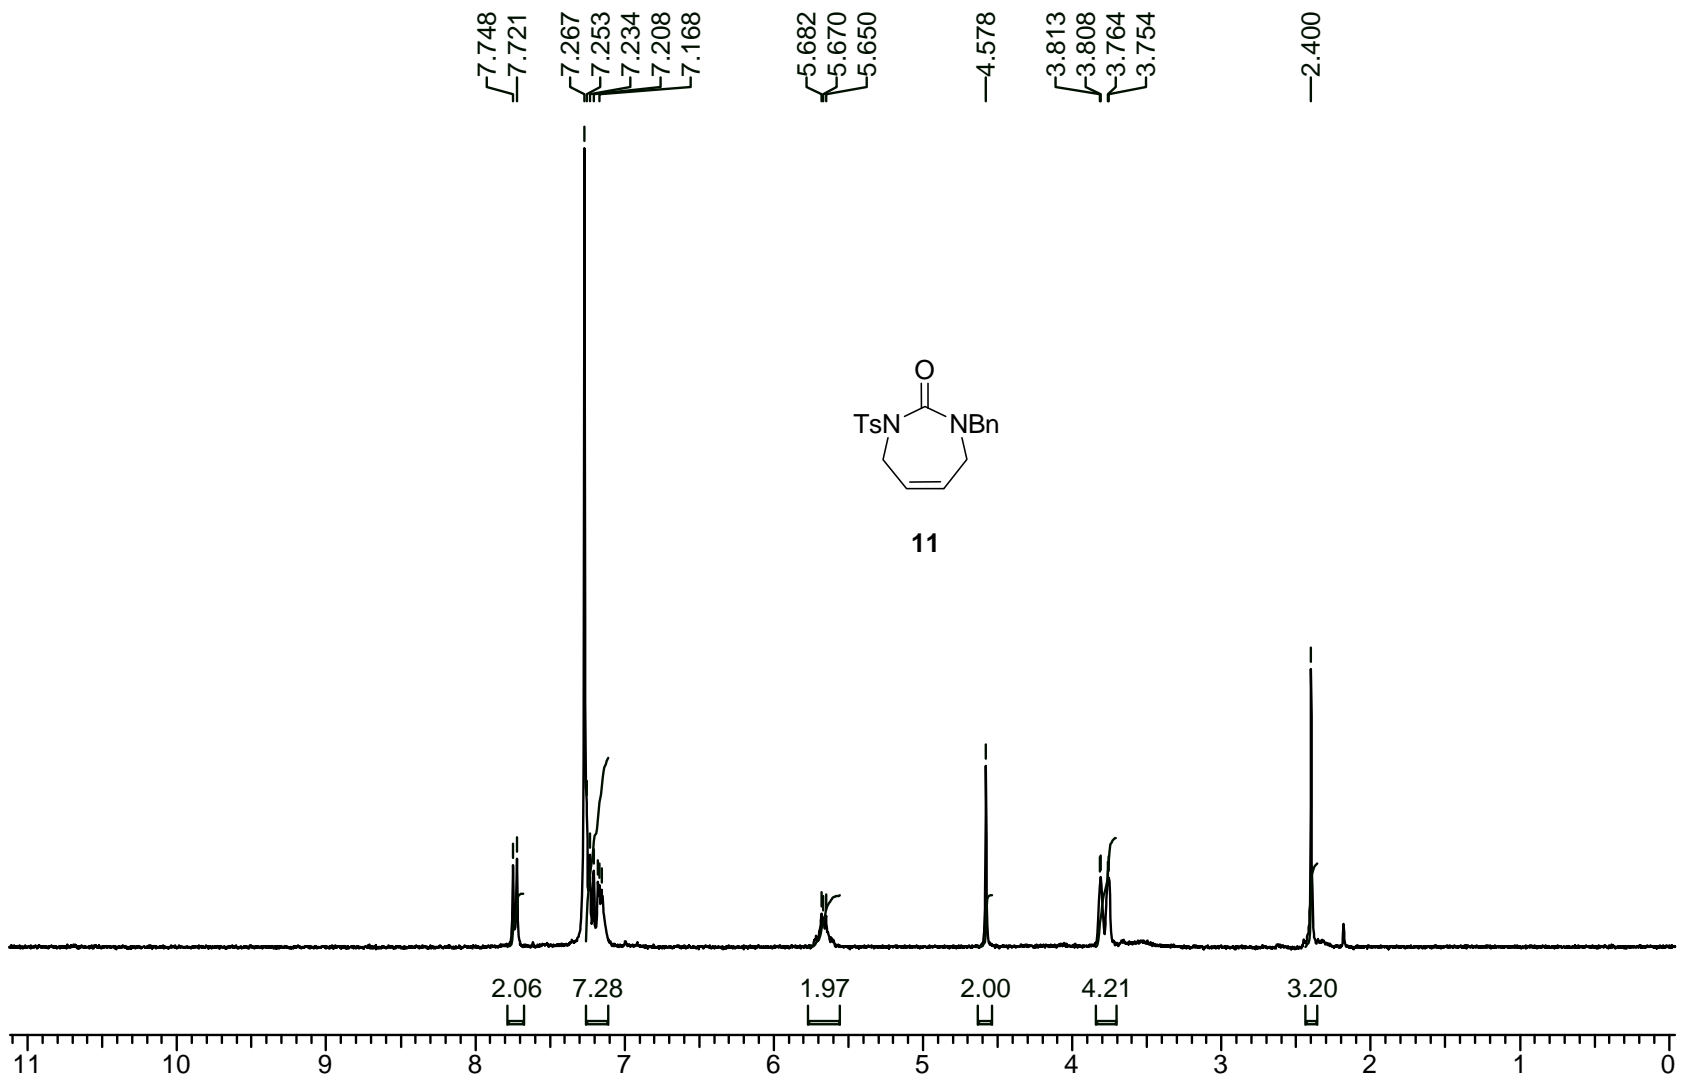

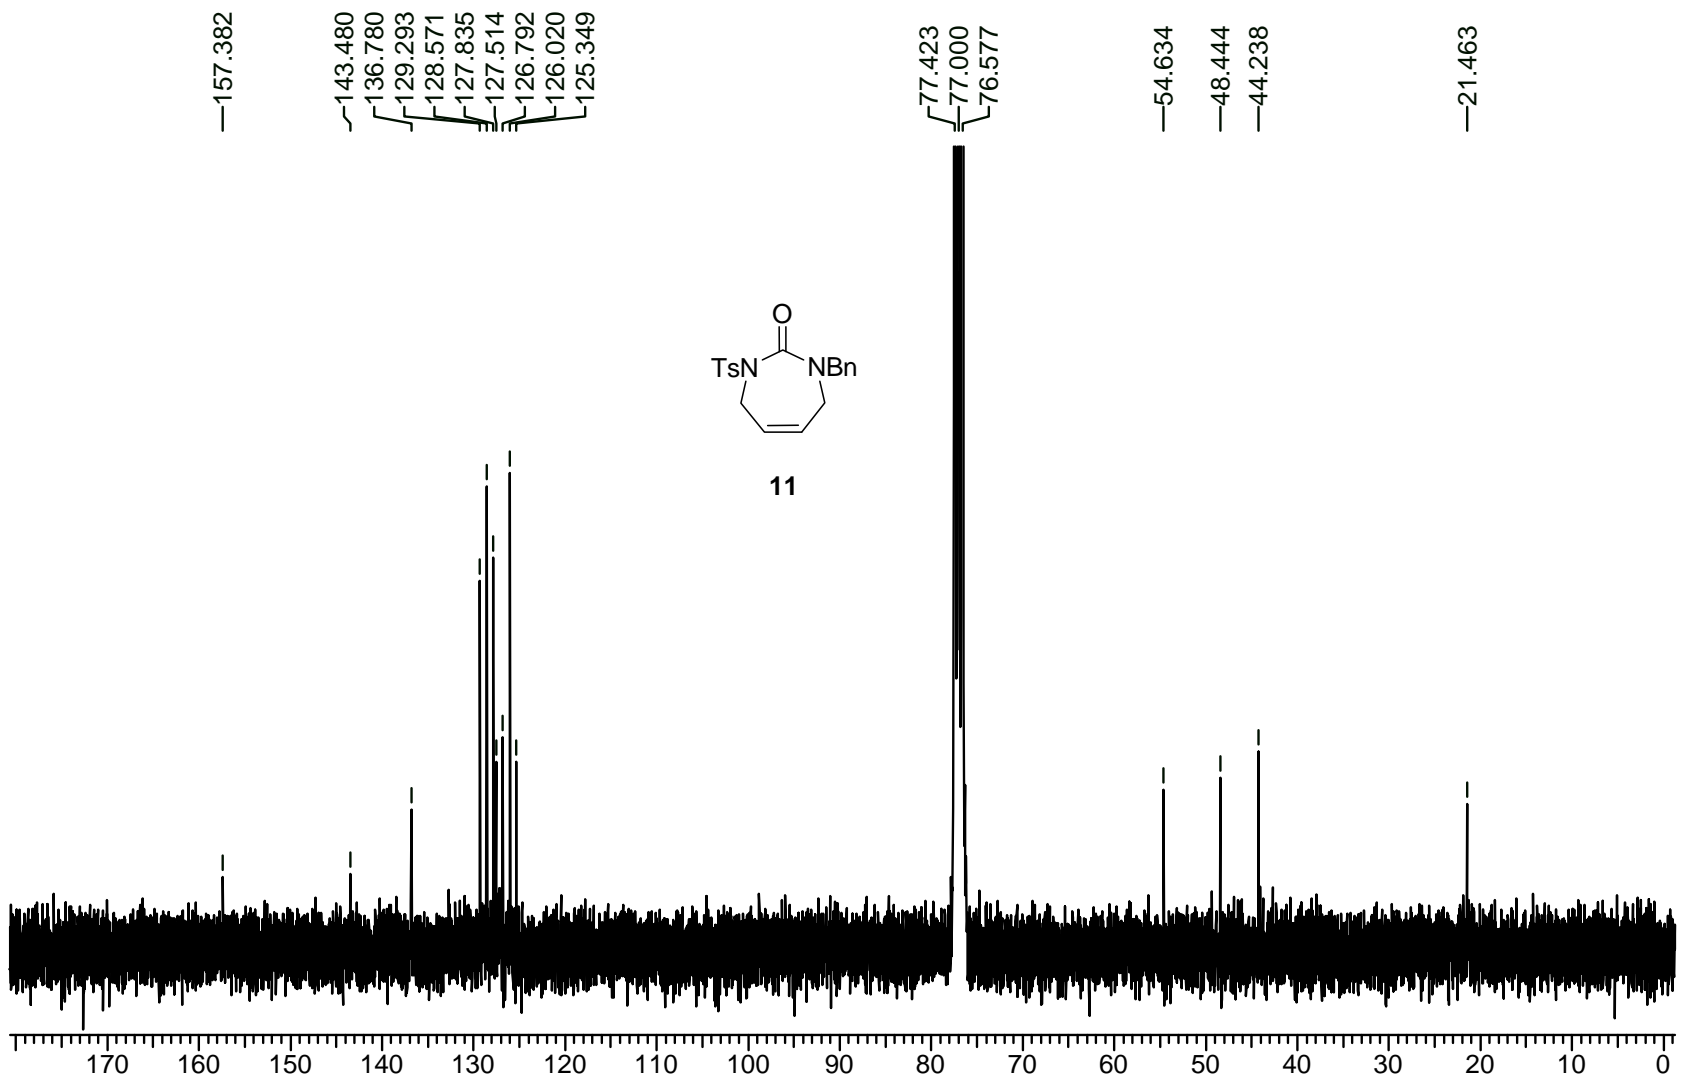

Supplement: c8cc08564a1.pdf [file c8cc08564a1.pdf]
